# Supplementary material for: Visible light-initiated manganese-catalyzed hydrosulfonylation of alkenes
Source: Royal Society of Chemistry journal article supplement (doi:10.1039/d3gc00712j), 2023-01-01

## *Supporting information*

### **Visible-Light-Initiated Manganese-Catalyzed Hydrosulfonylation of Alkenes**

Chun-Min Li, Xin-Xin Dong, Zhe Wang,\* and Bo Zhang\*

*State Key Laboratory of Natural Medicines, China Pharmaceutical University,  
24 Tongjia Xiang, Nanjing 210009, China*

*E-mail: zb3981444@cpu.edu.cn; wangzhe@cpu.edu.cn*

#### **Table of contents**

|                                                                |     |
|----------------------------------------------------------------|-----|
| General                                                        | S2  |
| Optimization of reaction conditions                            | S3  |
| General procedure for hydrosulfonylation of alkenes (GP)       | S8  |
| Physical data of the compounds                                 | S9  |
| Synthesis of an intermediate for the preparation of Eletriptan | S36 |
| Mechanistic studies                                            | S38 |
| References                                                     | S46 |
| NMR spectra                                                    | S47 |

## *General*

All manipulations were conducted with a standard *Schlenk* tube under a nitrogen atmosphere. Unless otherwise noted, materials obtained from commercial suppliers were used without further purification. Anhydrous decalin, cyclohexane, EtOAc, THF, CH<sub>3</sub>CN, and CH<sub>2</sub>Cl<sub>2</sub> were purchased from J&K Chemical or Energy Chemical and used as received. These solvents were dried and degassed by commercial suppliers.

Flash column chromatography was carried out on silica gel (200-300 mesh). Thin layer chromatography (TLC) was performed using silica gel 60 F<sub>254</sub> plates.

<sup>1</sup>H NMR spectra were recorded on a *Bruker AV-300 or AV-400* spectrometer at room temperature. Chemical shifts (in ppm) were referenced to tetramethylsilane ( $\delta = 0$  ppm) in CDCl<sub>3</sub> as an internal standard. <sup>13</sup>C NMR spectra were obtained by the same NMR spectrometer and were calibrated with CDCl<sub>3</sub> ( $\delta = 77.00$  ppm). <sup>19</sup>F NMR spectra were obtained by the same NMR spectrometer and using CFCI<sub>3</sub> as external standard. Data for <sup>1</sup>H NMR are reported as follows: chemical shifts ( $\delta$  ppm), multiplicity (s = singlet, d = doublet, t = triplet, q = quartet, m = multiplet or unresolved, br s = broad singlet), coupling constant (Hz) and integration. Data for <sup>13</sup>C NMR are reported in terms of chemical shift and multiplicity where appropriate. Mass spectra (MS) were performed on an *Aglient 5977A*. High-Resolution Mass Spectrometry (HRMS) were performed on an *Aglient 6545 Q-TOF*. The yields were determined on a *METTLER TOLEDO ME 104* balance (accuracy: 0.1 mg).

## Optimization of reaction conditions

**Table S1. Evaluation of ligand<sup>a,b</sup>**

| <p><b>L1, 64%</b></p>  | <p><b>L2, 46%</b></p>  | <p><b>L3, 60%</b></p>  | <p><b>L4, 39%</b></p>  |
|------------------------|------------------------|------------------------|------------------------|
| <p><b>L5, 54%</b></p>  | <p><b>L6, 25%</b></p>  | <p><b>L7, 31%</b></p>  | <p><b>L8, 42%</b></p>  |
| <p><b>L9, 32%</b></p>  | <p><b>L10, 36%</b></p> | <p><b>L11, 34%</b></p> | <p><b>L12, 45%</b></p> |
| <p><b>L13, 43%</b></p> | <p><b>L14, 32%</b></p> | <p><b>L15, 40%</b></p> | <p><b>L16, 28%</b></p> |
| <p><b>L17, 28%</b></p> | <p><b>L18, 24%</b></p> | <p><b>L19, 26%</b></p> | <p><b>L20, 26%</b></p> |

<sup>a</sup>Reaction conditions: **1** (0.5 mmol), **2** (0.2 mmol), (Me<sub>3</sub>Si)<sub>3</sub>SiH (0.3 mmol), Mn<sub>2</sub>(CO)<sub>10</sub> (10 mol%), and ligand (20 mol%) in CH<sub>2</sub>Cl<sub>2</sub> (2.0 mL) were irradiated with 6 W blue LEDs at room temperature under N<sub>2</sub> for 12 h. <sup>b</sup>Isolated yields.

**Table S2. Evaluation of H-atom donor<sup>a</sup>**

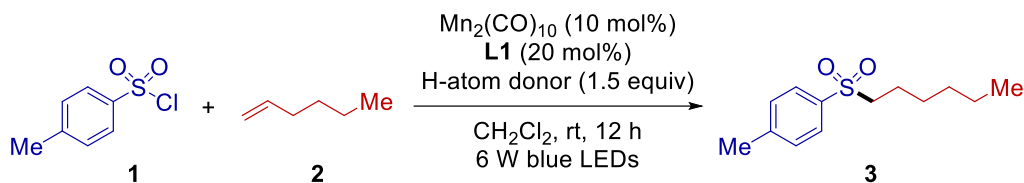

| entry | H-atom donor (equiv)                              | solvent                  | yield <sup>b</sup> (%) |
|-------|---------------------------------------------------|--------------------------|------------------------|
| 1     | ( $\text{Me}_3\text{Si}$ ) <sub>3</sub> SiH (1.5) | $\text{CH}_2\text{Cl}_2$ | 64                     |
| 2     | $\text{Et}_3\text{SiH}$ (1.5)                     | $\text{CH}_2\text{Cl}_2$ | trace                  |
| 3     | $\text{Ph}_3\text{SiH}$ (1.5)                     | $\text{CH}_2\text{Cl}_2$ | trace                  |
| 4     | ( <i>i</i> Pr) <sub>3</sub> SiH (1.5)             | $\text{CH}_2\text{Cl}_2$ | trace                  |
| 5     | (EtO) <sub>3</sub> SiH (1.5)                      | $\text{CH}_2\text{Cl}_2$ | trace                  |
| 6     | (MeO) <sub>3</sub> SiH (1.5)                      | $\text{CH}_2\text{Cl}_2$ | trace                  |
| 7     | Hantzsch ester (1.5)                              | $\text{CH}_2\text{Cl}_2$ | 0                      |
| 8     | <i>n</i> Bu <sub>3</sub> SnH (1.5)                | $\text{CH}_2\text{Cl}_2$ | 0                      |

<sup>a</sup>Reaction conditions: **1** (0.5 mmol), **2** (0.2 mmol), H-atom donor (0.3 mmol),  $\text{Mn}_2(\text{CO})_{10}$  (10 mol%), and **L1** (20 mol%) in  $\text{CH}_2\text{Cl}_2$  (2.0 mL) were irradiated with 6 W blue LEDs at room temperature under  $\text{N}_2$  for 12 h. <sup>b</sup>Isolated yields.

**Table S3. Evaluation of solvent<sup>a</sup>**

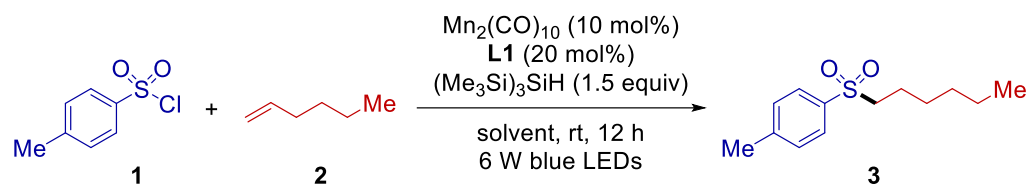

| entry | H-atom donor (equiv)                       | solvent                  | yield <sup>b</sup> (%) |
|-------|--------------------------------------------|--------------------------|------------------------|
| 1     | $(\text{Me}_3\text{Si})_3\text{SiH}$ (1.5) | $\text{CH}_2\text{Cl}_2$ | 64                     |
| 2     | $(\text{Me}_3\text{Si})_3\text{SiH}$ (1.5) | decalin                  | trace                  |
| 3     | $(\text{Me}_3\text{Si})_3\text{SiH}$ (1.5) | cyclohexane              | trace                  |
| 4     | $(\text{Me}_3\text{Si})_3\text{SiH}$ (1.5) | EtOAc                    | 30                     |
| 5     | $(\text{Me}_3\text{Si})_3\text{SiH}$ (1.5) | THF                      | 50                     |
| 6     | $(\text{Me}_3\text{Si})_3\text{SiH}$ (1.5) | $\text{CH}_3\text{CN}$   | 43                     |

<sup>a</sup>Reaction conditions: **1** (0.5 mmol), **2** (0.2 mmol),  $(\text{Me}_3\text{Si})_3\text{SiH}$  (0.3 mmol),  $\text{Mn}_2(\text{CO})_{10}$  (10 mol%), and **L1** (20 mol%) in solvent (2.0 mL) were irradiated with 6 W blue LEDs at room temperature under  $\text{N}_2$  for 12 h. <sup>b</sup>Isolated yields.

**Table S4. Evaluation of different reaction parameters<sup>a</sup>**

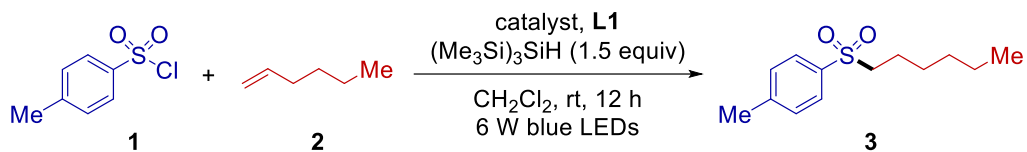

| entry           | catalyst (mol%)                        | ligand (mol%)  | H-atom donor (equiv)                       | <b>1</b> (equiv) | yield <sup>b</sup> (%) |
|-----------------|----------------------------------------|----------------|--------------------------------------------|------------------|------------------------|
| 1               | $\text{Mn}_2(\text{CO})_{10}$ (10)     | <b>L1</b> (20) | $(\text{Me}_3\text{Si})_3\text{SiH}$ (1.5) | 3.0              | 62                     |
| 2               | $\text{Mn}_2(\text{CO})_{10}$ (10)     | <b>L1</b> (20) | $(\text{Me}_3\text{Si})_3\text{SiH}$ (1.5) | 2.5              | 64                     |
| 3               | $\text{Mn}_2(\text{CO})_{10}$ (10)     | <b>L1</b> (20) | $(\text{Me}_3\text{Si})_3\text{SiH}$ (1.5) | 2.0              | 66                     |
| 4               | $\text{Mn}_2(\text{CO})_{10}$ (10)     | <b>L1</b> (20) | $(\text{Me}_3\text{Si})_3\text{SiH}$ (1.5) | 1.5              | 72                     |
| 5               | $\text{Mn}_2(\text{CO})_{10}$ (10)     | <b>L1</b> (20) | $(\text{Me}_3\text{Si})_3\text{SiH}$ (1.5) | 1.2              | 55                     |
| 6               | $\text{Mn}_2(\text{CO})_{10}$ (10)     | <b>L1</b> (20) | $(\text{Me}_3\text{Si})_3\text{SiH}$ (1.2) | 1.5              | 65                     |
| 7               | $\text{Mn}_2(\text{CO})_{10}$ (10)     | <b>L1</b> (20) | $(\text{Me}_3\text{Si})_3\text{SiH}$ (2.0) | 1.5              | 62                     |
| 8               | $\text{Mn}_2(\text{CO})_{10}$ (5)      | <b>L1</b> (10) | $(\text{Me}_3\text{Si})_3\text{SiH}$ (1.5) | 1.5              | 46                     |
| 9               | $\text{Mn}_2(\text{CO})_{10}$ (15)     | <b>L1</b> (30) | $(\text{Me}_3\text{Si})_3\text{SiH}$ (1.5) | 1.5              | 52                     |
| 10              | $\text{Mn}(\text{CO})_5\text{Br}$ (10) | <b>L1</b> (10) | $(\text{Me}_3\text{Si})_3\text{SiH}$ (1.5) | 1.5              | 51                     |
| 11 <sup>c</sup> | $\text{Mn}_2(\text{CO})_{10}$ (10)     | <b>L1</b> (20) | $(\text{Me}_3\text{Si})_3\text{SiH}$ (1.5) | 1.5              | 55                     |

<sup>a</sup>Reaction conditions: **1**, **2** (0.2 mmol),  $(\text{Me}_3\text{Si})_3\text{SiH}$ ,  $\text{Mn}_2(\text{CO})_{10}$ , and **L1** in  $\text{CH}_2\text{Cl}_2$  (2.0 mL) were irradiated with 6 W blue LEDs at room temperature under  $\text{N}_2$  for 12 h. <sup>b</sup>Isolated yields. <sup>c</sup>The reaction was conducted under the irradiation of 6 W 390 nm LED source.

**Table S5. Control experiments<sup>a</sup>**

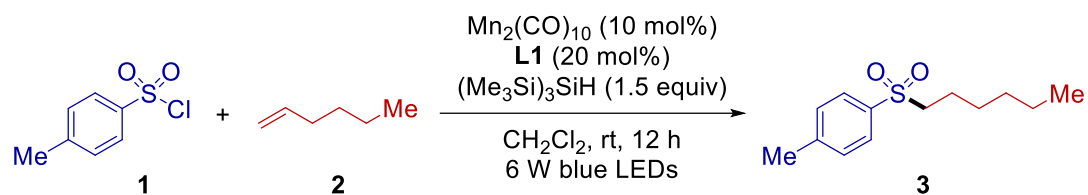

| entry          | catalyst (mol%)                    | ligand (mol%)  | H-atom donor (equiv)                       | yield <sup>b</sup> (%) |
|----------------|------------------------------------|----------------|--------------------------------------------|------------------------|
| 1 <sup>c</sup> | $\text{Mn}_2(\text{CO})_{10}$ (10) | <b>L1</b> (20) | $(\text{Me}_3\text{Si})_3\text{SiH}$ (1.5) | 0                      |
| 2              | $\text{Mn}_2(\text{CO})_{10}$ (10) | none           | $(\text{Me}_3\text{Si})_3\text{SiH}$ (1.5) | 19                     |
| 3              | $\text{Mn}_2(\text{CO})_{10}$ (10) | <b>L1</b> (20) | none                                       | 0                      |
| 4              | none                               | <b>L1</b> (20) | $(\text{Me}_3\text{Si})_3\text{SiH}$ (1.5) | 23                     |
| 5              | none                               | none           | $(\text{Me}_3\text{Si})_3\text{SiH}$ (1.5) | 0                      |
| 6 <sup>d</sup> | $\text{Mn}_2(\text{CO})_{10}$ (10) | <b>L1</b> (20) | $(\text{Me}_3\text{Si})_3\text{SiH}$ (1.5) | trace                  |

<sup>a</sup>Reaction conditions: **1** (0.3 mmol), **2** (0.2 mmol),  $(\text{Me}_3\text{Si})_3\text{SiH}$  (0.3 mmol),  $\text{Mn}_2(\text{CO})_{10}$  (10 mol%), and **L1** (20 mol%) in  $\text{CH}_2\text{Cl}_2$  (2.0 mL) were irradiated with 6 W blue LEDs at room temperature under  $\text{N}_2$  for 12 h. <sup>b</sup>Isolated yields. <sup>c</sup>The reaction was conducted in the dark. <sup>d</sup>The reaction was conducted under air.

***General procedure for hydrosulfonylation of alkenes (GP):***

Alkene (0.2 mmol, 1.0 equiv), sulfonyl chloride (0.3 mmol, 1.5 equiv),  $(\text{Me}_3\text{Si})_3\text{SiH}$  (0.3 mmol, 1.5 equiv), 1,3-bis(diphenylphosphanyl)propane (0.04 mmol, 0.2 equiv), and  $\text{Mn}_2(\text{CO})_{10}$  (0.02 mmol, 0.1 equiv) were placed in a dry 10 mL Schlenk tube under a nitrogen atmosphere. Then anhydrous  $\text{CH}_2\text{Cl}_2$  (2.0 mL) was added with a syringe. The reaction mixture was stirred and irradiated by using 6 W blue LEDs at room temperature for 12 h. After completion of the reaction, the solvent was removed under reduced pressure and the residue was purified by flash column chromatography on silica gel to afford the product.

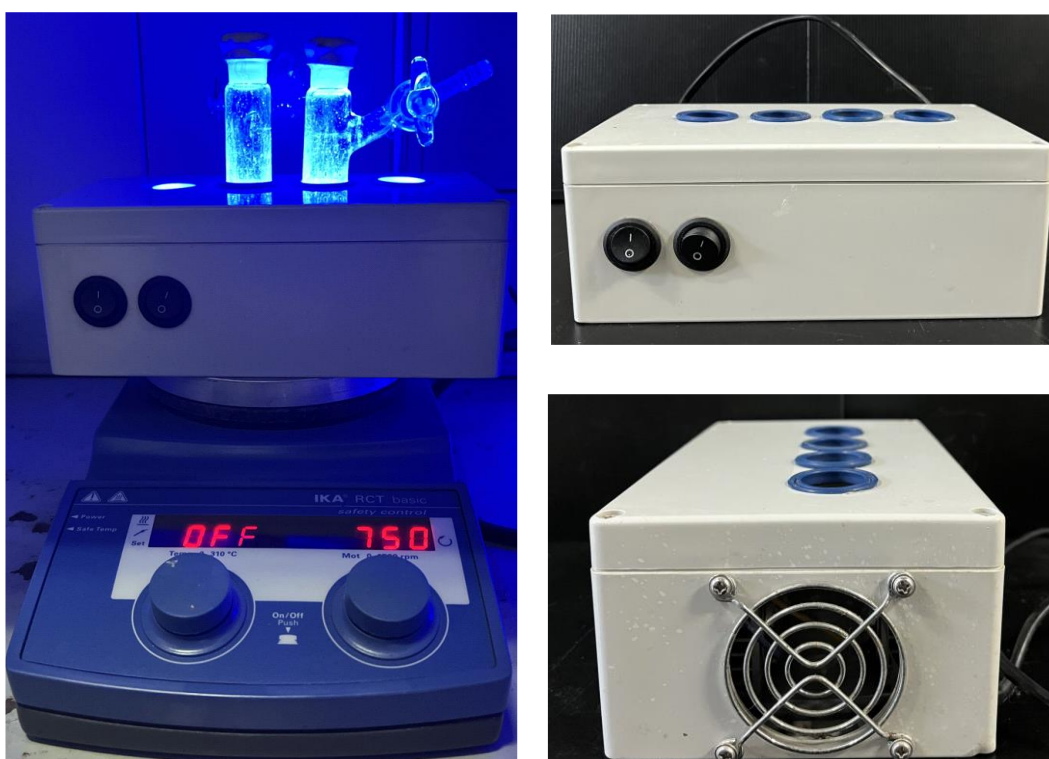

Reaction setup (4x6 W blue LEDs)



## Physical data of the compounds

### 1-(Hexylsulfonyl)-4-methylbenzene (**3**)<sup>[1]</sup>

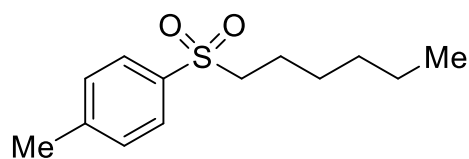

According to **GP** with hex-1-ene (25  $\mu$ L, 0.2 mmol, 1.0 equiv), 4-methylbenzenesulfonyl chloride (57.5 mg, 0.3 mmol, 1.5 equiv),  $(\text{Me}_3\text{Si})_3\text{SiH}$  (93  $\mu$ L, 0.3 mmol, 1.5 equiv), 1,3-bis(diphenylphosphanyl)propane (16.8 mg, 0.04 mmol, 0.2 equiv), and  $\text{Mn}_2(\text{CO})_{10}$  (8.1 mg, 0.02 mmol, 0.1 equiv). The crude reaction mixture was purified by flash silica gel column chromatography (petroleum ether/EtOAc = 30:1) to afford the desired product **3** as pale yellow oil (34.7 mg, 72%). **<sup>1</sup>H NMR** (400 MHz,  $\text{CDCl}_3$ )  $\delta$  7.74-7.67 (m, 2H), 7.32-7.24 (m, 2H), 3.00-2.96 (m, 2H), 2.37 (s, 3H), 1.65-1.57 (m, 2H), 1.30-1.23 (m, 2H), 1.21-1.14 (m, 4H), 0.77 (t,  $J$  = 6.9 Hz, 3H); **<sup>13</sup>C NMR** (100 MHz,  $\text{CDCl}_3$ )  $\delta$  144.4, 136.2, 129.8, 128.0, 56.3, 31.1, 27.8, 22.6, 22.2, 21.5, 13.8. **MS** (ESI)  $m/z$  241.2  $[\text{M}+\text{H}]^+$ .

### 1-((2-Cyclohexylethyl)sulfonyl)-4-methylbenzene (**4**)<sup>[2]</sup>

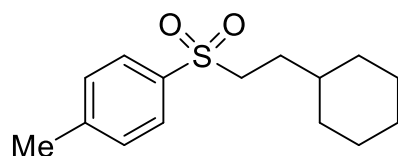

According to **GP** with vinylcyclohexane (28  $\mu$ L, 0.2 mmol, 1.0 equiv), 4-methylbenzenesulfonyl chloride (57.9 mg, 0.3 mmol, 1.5 equiv),  $(\text{Me}_3\text{Si})_3\text{SiH}$  (93  $\mu$ L, 0.3 mmol, 1.5 equiv), 1,3-bis(diphenylphosphanyl)propane (16.9 mg, 0.04 mmol, 0.2 equiv), and  $\text{Mn}_2(\text{CO})_{10}$  (8.4 mg, 0.02 mmol, 0.1 equiv). The crude reaction mixture was purified by flash silica gel column chromatography (petroleum ether/EtOAc = 30:1) to afford the desired product **4** as white solid (43.4 mg, 81%). **<sup>1</sup>H NMR** (400 MHz,  $\text{CDCl}_3$ )  $\delta$  7.81-7.74 (m, 2H), 7.38-7.32 (m, 2H), 3.09-3.05 (m, 2H), 2.45 (s, 3H), 1.69-1.57 (m, 7H), 1.32-1.07 (m, 4H), 0.90-0.81 (m, 2H); **<sup>13</sup>C NMR** (75 MHz,  $\text{CDCl}_3$ )  $\delta$  144.5, 136.2, 129.8, 128.0, 54.4, 36.6, 32.8, 29.7, 26.2, 26.0, 21.6. **MS** (ESI)  $m/z$  267.1  $[\text{M}+\text{H}]^+$ .

### 1-((3-cyclopentylpropyl)sulfonyl)-4-methylbenzene (**5**)

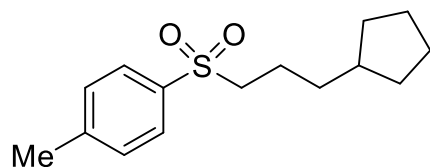

According to **GP** with allylcyclopentane (28  $\mu\text{L}$ , 0.2 mmol, 1.0 equiv), 4-methylbenzenesulfonyl chloride (57.4 mg, 0.3 mmol, 1.5 equiv),  $(\text{Me}_3\text{Si})_3\text{SiH}$  (93  $\mu\text{L}$ , 0.3 mmol, 1.5 equiv), 1,3-bis(diphenylphosphanyl)propane (16.9 mg, 0.04 mmol, 0.2 equiv), and  $\text{Mn}_2(\text{CO})_{10}$  (8.6 mg, 0.02 mmol, 0.1 equiv). The crude reaction mixture was purified by flash silica gel column chromatography (petroleum ether/EtOAc = 30:1) to afford the desired product **5** as pale yellow oil (37.3 mg, 70%).  $^1\text{H NMR}$  (400 MHz,  $\text{CDCl}_3$ )  $\delta$  7.81-7.75 (m, 2H), 7.39-7.33 (m, 2H), 3.08-3.04 (m, 2H), 2.45 (s, 3H), 1.75-1.67 (m, 5H), 1.59-1.45 (m, 4H), 1.37-1.32 (m, 2H), 1.07-0.96 (m, 2H);  $^{13}\text{C NMR}$  (75 MHz,  $\text{CDCl}_3$ )  $\delta$  144.5, 136.2, 129.8, 128.0, 56.6, 39.6, 34.6, 32.4, 25.0, 21.9, 21.6. **HRMS** (ESI) calculated for  $\text{C}_{15}\text{H}_{22}\text{NaO}_2\text{S}$   $[\text{M}+\text{Na}]^+$   $m/z$  289.1233, found 289.1231.

### 1-Methyl-4-((3-phenylpropyl)sulfonyl)benzene (**6**)<sup>[3]</sup>

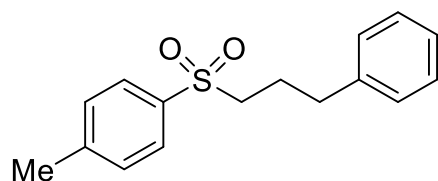

According to **GP** with allylbenzene (27  $\mu\text{L}$ , 0.2 mmol, 1.0 equiv), 4-methylbenzenesulfonyl chloride (57.6 mg, 0.3 mmol, 1.5 equiv),  $(\text{Me}_3\text{Si})_3\text{SiH}$  (93  $\mu\text{L}$ , 0.3 mmol, 1.5 equiv), 1,3-bis(diphenylphosphanyl)propane (16.6 mg, 0.04 mmol, 0.2 equiv), and  $\text{Mn}_2(\text{CO})_{10}$  (8.2 mg, 0.02 mmol, 0.1 equiv). The crude reaction mixture was purified by flash silica gel column chromatography (petroleum ether/EtOAc = 30:1) to afford the desired product **6** as yellow oil (39.0 mg, 71%).  $^1\text{H NMR}$  (300 MHz,  $\text{CDCl}_3$ )  $\delta$  7.80-7.71 (m, 2H), 7.38-7.31 (m, 2H), 7.35-7.17 (m, 3H), 7.13-7.06 (m, 2H), 3.08-3.03 (m, 2H), 2.69 (t,  $J = 7.5$  Hz, 2H), 2.44 (s, 3H), 2.08-1.98 (m, 2H);  $^{13}\text{C NMR}$  (75 MHz,  $\text{CDCl}_3$ )  $\delta$  144.6, 139.9, 136.1, 129.8, 128.5, 128.3, 128.0, 126.3, 55.5, 34.0, 24.2, 21.6. **MS** (ESI)  $m/z$  275.1  $[\text{M}+\text{H}]^+$ .

### 1-Methyl-4-((4-phenoxybutyl)sulfonyl)benzene (7)

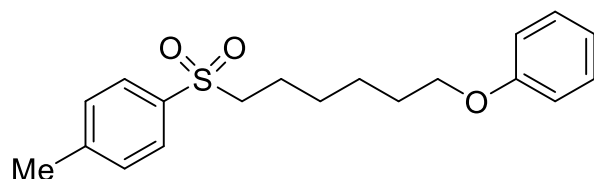

According to **GP** with (but-3-en-1-yloxy)benzene (35.6 mg, 0.2 mmol, 1.0 equiv), 4-methylbenzenesulfonyl chloride (57.9 mg, 0.3 mmol, 1.5 equiv),  $(\text{Me}_3\text{Si})_3\text{SiH}$  (93  $\mu\text{L}$ , 0.3 mmol, 1.5 equiv), 1,3-bis(diphenylphosphanyl)propane (16.7 mg, 0.04 mmol, 0.2 equiv), and  $\text{Mn}_2(\text{CO})_{10}$  (8.4 mg, 0.02 mmol, 0.1 equiv). The crude reaction mixture was purified by flash silica gel column chromatography (petroleum ether/EtOAc = 20:1) to afford the desired product **7** as pale yellow oil (34.6 mg, 52%).  **$^1\text{H NMR}$**  (300 MHz,  $\text{CDCl}_3$ )  $\delta$  7.81-7.73 (m, 2H), 7.38-7.31 (m, 2H), 7.29-7.23 (m, 2H), 6.94-6.89 (m, 1H), 6.88-6.81 (m, 2H), 3.90 (t,  $J = 6.3$  Hz, 2H), 3.09-3.04 (m, 2H), 2.43 (s, 3H), 1.77-1.71 (m, 4H), 1.44-1.41 (m, 4H);  **$^{13}\text{C NMR}$**  (75 MHz,  $\text{CDCl}_3$ )  $\delta$  158.8, 144.5, 136.0, 129.8, 129.3, 127.9, 120.4, 114.3, 67.2, 56.1, 28.8, 27.9, 25.5, 22.6, 21.5. **HRMS** (ESI) calculated for  $\text{C}_{19}\text{H}_{24}\text{NaO}_3\text{S}$   $[\text{M}+\text{Na}]^+$   $m/z$  355.1338, found 355.1362.

### 1-((3,3-Diethoxypropyl)sulfonyl)-4-methylbenzene (8)

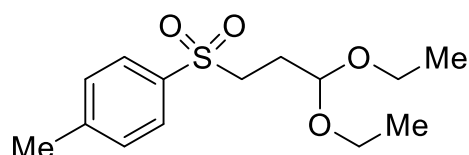

According to **GP** with 3,3-diethoxyprop-1-ene (31  $\mu\text{L}$ , 0.2 mmol, 1.0 equiv), 4-methylbenzenesulfonyl chloride (57.8 mg, 0.3 mmol, 1.5 equiv),  $(\text{Me}_3\text{Si})_3\text{SiH}$  (93  $\mu\text{L}$ , 0.3 mmol, 1.5 equiv), 1,3-bis(diphenylphosphanyl)propane (16.7 mg, 0.04 mmol, 0.2 equiv), and  $\text{Mn}_2(\text{CO})_{10}$  (8.0 mg, 0.02 mmol, 0.1 equiv). The crude reaction mixture was purified by flash silica gel column chromatography (petroleum ether/EtOAc = 20:1) to afford the desired product **8** as pale yellow oil (34.0 mg, 60%).  **$^1\text{H NMR}$**  (300 MHz,  $\text{CDCl}_3$ )  $\delta$  7.83-7.74 (m, 2H), 7.41-7.30 (m, 2H), 4.54 (t,  $J = 5.3$  Hz, 1H), 3.65-3.55 (m, 2H), 3.50-3.39 (m, 2H), 3.20-3.15 (m, 2H), 2.45 (s, 3H), 2.03-1.96 (m, 2H), 1.16 (t,  $J = 7.1$  Hz, 6H);  **$^{13}\text{C NMR}$**  (75 MHz,  $\text{CDCl}_3$ )  $\delta$  144.5, 135.8, 129.7, 127.8, 100.5, 61.8, 51.6, 27.1, 21.4, 15.0. **HRMS** (ESI) calculated for  $\text{C}_{14}\text{H}_{22}\text{NaO}_4\text{S}$   $[\text{M}+\text{Na}]^+$   $m/z$  309.1131, found 309.1131.

### Methyl 6-tosylhexanoate (**9**)

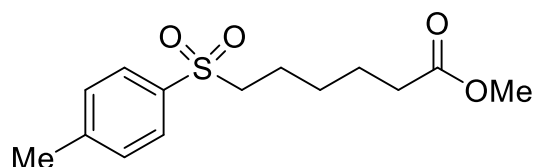

According to **GP** with methyl hex-5-enoate (28  $\mu$ L, 0.2 mmol, 1.0 equiv), 4-methylbenzenesulfonyl chloride (57.5 mg, 0.3 mmol, 1.5 equiv),  $(\text{Me}_3\text{Si})_3\text{SiH}$  (93  $\mu$ L, 0.3 mmol, 1.5 equiv), 1,3-bis(diphenylphosphanyl)propane (16.5 mg, 0.04 mmol, 0.2 equiv), and  $\text{Mn}_2(\text{CO})_{10}$  (8.2 mg, 0.02 mmol, 0.1 equiv). The crude reaction mixture was purified by flash silica gel column chromatography (petroleum ether/EtOAc = 10:1) to afford the desired product **9** as yellow oil (45.7 mg, 80%).  **$^1\text{H}$  NMR** (300 MHz,  $\text{CDCl}_3$ )  $\delta$  7.81-7.74 (m, 2H), 7.41-7.33 (m, 2H), 3.65 (s, 3H), 3.09-3.04 (m, 2H), 2.46 (s, 3H), 2.28 (t,  $J = 7.3$  Hz, 2H), 1.77-1.65 (m, 2H), 1.62-1.55 (m, 2H), 1.45-1.34 (m, 2H);  **$^{13}\text{C}$  NMR** (75 MHz,  $\text{CDCl}_3$ )  $\delta$  173.6, 144.6, 136.0, 129.8, 128.0, 56.0, 51.5, 33.4, 27.6, 24.2, 22.4, 21.5. **HRMS** (ESI) calculated for  $\text{C}_{14}\text{H}_{20}\text{NaO}_4\text{S}$   $[\text{M}+\text{Na}]^+$   $m/z$  307.0975, found 307.0971.

### 4-Tosylbutanenitrile (**10**)<sup>[4]</sup>

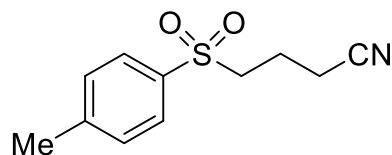

According to **GP** with but-3-enenitrile (16  $\mu$ L, 0.2 mmol, 1.0 equiv), 4-methylbenzenesulfonyl chloride (115.2 mg, 0.6 mmol, 3.0 equiv),  $(\text{Me}_3\text{Si})_3\text{SiH}$  (93  $\mu$ L, 0.3 mmol, 1.5 equiv), 1,3-bis(diphenylphosphanyl)propane (17.0 mg, 0.04 mmol, 0.2 equiv), and  $\text{Mn}_2(\text{CO})_{10}$  (8.2 mg, 0.02 mmol, 0.1 equiv). The reaction was conducted for 24 h. The crude reaction mixture was purified by flash silica gel column chromatography (petroleum ether/EtOAc = 20:1) to afford the desired product **10** as yellow oil (17.9 mg, 40%).  **$^1\text{H}$  NMR** (400 MHz,  $\text{CDCl}_3$ )  $\delta$  7.81-7.75 (m, 2H), 7.42-7.36 (m, 2H), 3.21 (t,  $J = 7.4$  Hz, 2H), 2.57 (t,  $J = 7.1$  Hz, 2H), 2.46 (s, 3H), 2.14-2.07 (m, 2H);  **$^{13}\text{C}$  NMR** (75 MHz,  $\text{CDCl}_3$ )  $\delta$  145.1, 135.2, 129.9, 127.7, 118.1, 54.0, 21.4, 18.9, 15.8. **MS** (ESI)  $m/z$  224.3  $[\text{M}+\text{H}]^+$ .

### Methyl (3-tosylpropyl) carbonate (11)

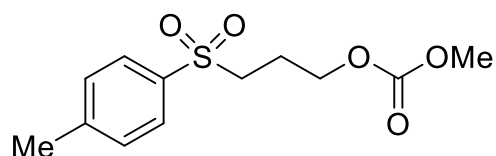

According to **GP** with allyl methyl carbonate (23  $\mu$ L, 0.2 mmol, 1.0 equiv), 4-methylbenzenesulfonyl chloride (114.9 mg, 0.6 mmol, 3.0 equiv),  $(\text{Me}_3\text{Si})_3\text{SiH}$  (93  $\mu$ L, 0.3 mmol, 1.5 equiv), 1,3-bis(diphenylphosphanyl)propane (17.1 mg, 0.04 mmol, 0.2 equiv), and  $\text{Mn}_2(\text{CO})_{10}$  (8.0 mg, 0.02 mmol, 0.1 equiv). The reaction was conducted for 24 h. The crude reaction mixture was purified by flash silica gel column chromatography (petroleum ether/EtOAc = 10:1) to afford the desired product **11** as white solid (28.4 mg, 50%).  $^1\text{H NMR}$  (300 MHz,  $\text{CDCl}_3$ )  $\delta$  7.82-7.75 (m, 2H), 7.41-7.34 (m, 2H), 4.20 (t,  $J = 6.1$  Hz, 2H), 3.77 (s, 3H), 3.21-3.15 (m, 2H), 2.46 (s, 3H), 2.15-2.05 (m, 2H);  $^{13}\text{C NMR}$  (75 MHz,  $\text{CDCl}_3$ )  $\delta$  155.3, 144.9, 135.7, 130.0, 128.0, 65.6, 54.9, 52.9, 22.5, 21.6. **HRMS** (ESI) calculated for  $\text{C}_{12}\text{H}_{16}\text{NaO}_5\text{S}$   $[\text{M}+\text{Na}]^+$   $m/z$  295.0611, found 295.0609.

### 2-(Pent-4-en-1-yloxy)isoindoline-1,3-dione (12)

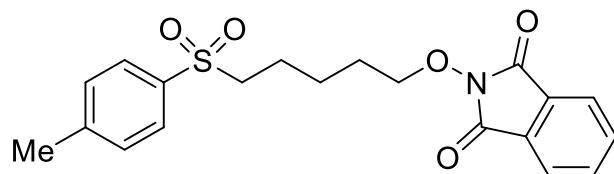

According to **GP** with 2-(pent-4-en-1-yloxy)isoindoline-1,3-dione (46.9 mg, 0.2 mmol, 1.0 equiv), 4-methylbenzenesulfonyl chloride (115.7 mg, 0.6 mmol, 3.0 equiv),  $(\text{Me}_3\text{Si})_3\text{SiH}$  (93  $\mu$ L, 0.3 mmol, 1.5 equiv), 1,3-bis(diphenylphosphanyl)propane (16.8 mg, 0.04 mmol, 0.2 equiv), and  $\text{Mn}_2(\text{CO})_{10}$  (8.2 mg, 0.02 mmol, 0.1 equiv). The reaction was conducted for 24 h. The crude reaction mixture was purified by flash silica gel column chromatography (petroleum ether/EtOAc = 10:1) to afford the desired product **12** as white solid (60.6 mg, 80%).  $^1\text{H NMR}$  (300 MHz,  $\text{CDCl}_3$ )  $\delta$  7.84-7.74 (m, 6H), 7.36 (d,  $J = 8.0$  Hz, 2H), 4.16 (t,  $J = 6.1$  Hz, 2H), 3.15-3.10 (m, 2H), 2.44 (s, 3H), 1.85-1.72 (m, 4H), 1.67-1.57 (m, 2H);  $^{13}\text{C NMR}$  (100 MHz,  $\text{CDCl}_3$ )  $\delta$  163.5, 144.5, 136.0, 134.5, 129.8, 128.8, 128.0, 123.4, 77.8, 56.0, 27.5, 24.4, 22.4, 21.5. **HRMS** (ESI) calculated for  $\text{C}_{20}\text{H}_{21}\text{NNaO}_5\text{S}$   $[\text{M}+\text{Na}]^+$   $m/z$  410.1033, found 410.1034.

### 5-Tosylpentan-1-ol (13)

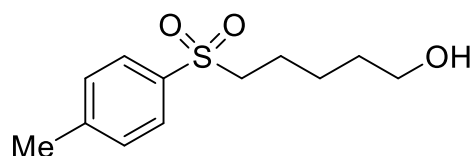

According to **GP** with pent-4-en-1-ol (21  $\mu$ L, 0.2 mmol, 1.0 equiv), 4-methylbenzenesulfonyl chloride (57.8 mg, 0.3 mmol, 1.5 equiv),  $(\text{Me}_3\text{Si})_3\text{SiH}$  (93  $\mu$ L, 0.3 mmol, 1.5 equiv), 1,3-bis(diphenylphosphanyl)propane (16.7 mg, 0.04 mmol, 0.2 equiv), and  $\text{Mn}_2(\text{CO})_{10}$  (8.1 mg, 0.02 mmol, 0.1 equiv). The crude reaction mixture was purified by flash silica gel column chromatography (petroleum ether/EtOAc = 10:1) to afford the desired product **13** as white solid (27.4 mg, 57%).  $^1\text{H NMR}$  (400 MHz,  $\text{CDCl}_3$ )  $\delta$  7.81-7.73 (m, 2H), 7.36 (d,  $J = 8.1$  Hz, 2H), 3.57 (t,  $J = 6.2$  Hz, 2H), 3.09-3.05 (m, 2H), 2.45 (s, 3H), 2.18 (brs, 1H), 1.76-1.68 (m, 2H), 1.55-1.49 (m, 2H), 1.47-1.39 (m, 2H);  $^{13}\text{C NMR}$  (100 MHz,  $\text{CDCl}_3$ )  $\delta$  144.6, 136.0, 129.8, 128.0, 62.1, 56.2, 31.9, 24.5, 22.4, 21.6. **HRMS** (ESI) calculated for  $\text{C}_{12}\text{H}_{18}\text{NaO}_3\text{S}$   $[\text{M}+\text{Na}]^+$   $m/z$  265.0869, found 265.0864.

### 6-Tosylhexan-2-one (14)

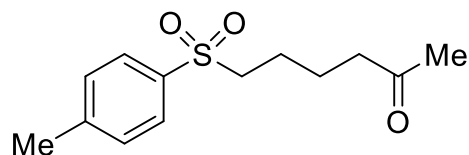

According to **GP** with hex-5-en-2-one (23  $\mu$ L, 0.2 mmol, 1.0 equiv), 4-methylbenzenesulfonyl chloride (115.1 mg, 0.6 mmol, 3.0 equiv),  $(\text{Me}_3\text{Si})_3\text{SiH}$  (93  $\mu$ L, 0.3 mmol, 1.5 equiv), 1,3-bis(diphenylphosphanyl)propane (16.6 mg, 0.04 mmol, 0.2 equiv), and  $\text{Mn}_2(\text{CO})_{10}$  (8.2 mg, 0.02 mmol, 0.1 equiv). The reaction was conducted for 24 h. The crude reaction mixture was purified by flash silica gel column chromatography (petroleum ether/EtOAc = 20:1) to afford the desired product **14** as pale yellow oil (35.6 mg, 70%).  $^1\text{H NMR}$  (400 MHz,  $\text{CDCl}_3$ )  $\delta$  7.82-7.72 (m, 2H), 7.36 (d,  $J = 8.0$  Hz, 2H), 3.10-3.06 (m, 2H), 2.48-2.40 (m, 2H), 2.45 (s, 3H), 2.11 (s, 3H), 1.73-1.60 (m, 4H);  $^{13}\text{C NMR}$  (100 MHz,  $\text{CDCl}_3$ )  $\delta$  207.5, 144.5, 135.9, 129.7, 127.8, 55.8, 42.5, 29.7, 22.1, 22.0, 21.4. **HRMS** (ESI) calculated for  $\text{C}_{13}\text{H}_{18}\text{NaO}_3\text{S}$   $[\text{M}+\text{H}]^+$   $m/z$  277.0869, found 277.0864.

#### 4-Methyl-N-(3-tosylpropyl)benzenesulfonamide (15)

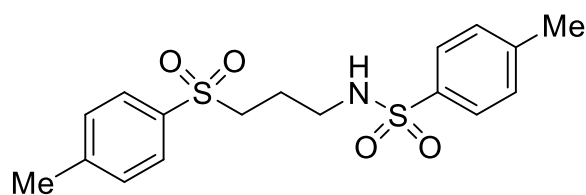

According to **GP** with *N*-allyl-4-methylbenzenesulfonamide (42.9 mg, 0.2 mmol, 1.0 equiv), 4-methylbenzenesulfonyl chloride (57.9 mg, 0.3 mmol, 1.5 equiv), (Me<sub>3</sub>Si)<sub>3</sub>SiH (93 μL, 0.3 mmol, 1.5 equiv), 1,3-bis(diphenylphosphanyl)propane (16.7 mg, 0.04 mmol, 0.2 equiv), and Mn<sub>2</sub>(CO)<sub>10</sub> (8.0 mg, 0.02 mmol, 0.1 equiv). The crude reaction mixture was purified by flash silica gel column chromatography (petroleum ether/EtOAc = 10:1) to afford the desired product **15** as white solid (46.3 mg, 62%). <sup>1</sup>H NMR (400 MHz, CDCl<sub>3</sub>) δ 7.79-7.73 (m, 2H), 7.72-7.67 (m, 2H), 7.36 (d, *J* = 8.0 Hz, 2H), 7.30 (d, *J* = 8.0 Hz, 2H), 4.85 (t, *J* = 6.5 Hz, 1H), 3.16-3.12 (m, 2H), 3.10-3.05 (m, 2H), 2.46 (s, 3H), 2.43 (s, 3H), 1.99-1.92 (m, 2H); <sup>13</sup>C NMR (100 MHz, CDCl<sub>3</sub>) δ 145.0, 143.6, 136.6, 135.9, 130.0, 129.8, 128.0, 127.0, 53.2, 41.4, 23.1, 21.6, 21.5. HRMS (ESI) calculated for C<sub>17</sub>H<sub>22</sub>NO<sub>4</sub>S<sub>2</sub> [M+H]<sup>+</sup> *m/z* 368.0985, found 368.0980.

#### 4-Tosylbutyl 4-methylbenzenesulfonate (16)

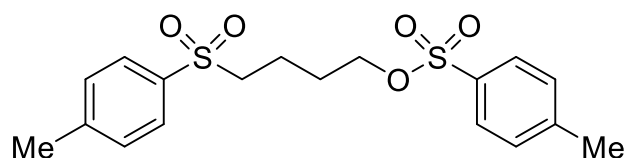

According to **GP** with but-3-en-1-yl 4-methylbenzenesulfonate (45.7 mg, 0.2 mmol, 1.0 equiv), 4-methylbenzenesulfonyl chloride (57.4 mg, 0.3 mmol, 1.5 equiv), (Me<sub>3</sub>Si)<sub>3</sub>SiH (93 μL, 0.3 mmol, 1.5 equiv), 1,3-bis(diphenylphosphanyl)propane (16.6 mg, 0.04 mmol, 0.2 equiv), and Mn<sub>2</sub>(CO)<sub>10</sub> (8.0 mg, 0.02 mmol, 0.1 equiv). The crude reaction mixture was purified by flash silica gel column chromatography (petroleum ether/EtOAc = 20:1) to afford the desired product **16** as white solid (57.2 mg, 75%). <sup>1</sup>H NMR (300 MHz, CDCl<sub>3</sub>) δ 7.81-7.75 (m, 2H), 7.74-7.70 (m, 2H), 7.41-7.36 (m, 2H), 7.35-7.31 (m, 2H), 4.00 (t, *J* = 7.4 Hz, 2H), 3.06-3.00 (m, 2H), 2.46 (s, 6H), 1.78-1.74 (m, 4H); <sup>13</sup>C NMR (100 MHz, CDCl<sub>3</sub>) δ 145.0, 144.8, 135.9, 132.7, 130.0, 129.9, 128.0, 127.8, 69.3, 55.3, 27.4, 21.62, 31.61, 19.2. HRMS (ESI) calculated for C<sub>18</sub>H<sub>26</sub>NO<sub>5</sub>S<sub>2</sub> [M+NH<sub>4</sub>]<sup>+</sup> *m/z* 400.1247, found 400.1238.

#### 4-Tosylbutyl furan-2-carboxylate (**17**)

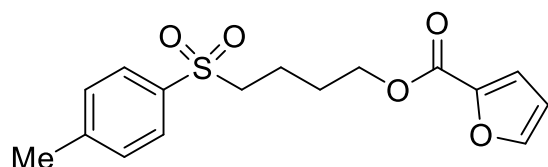

According to **GP** with but-3-en-1-yl furan-2-carboxylate (33.5 mg, 0.2 mmol, 1.0 equiv), 4-methylbenzenesulfonyl chloride (57.6 mg, 0.3 mmol, 1.5 equiv),  $(\text{Me}_3\text{Si})_3\text{SiH}$  (93  $\mu\text{L}$ , 0.3 mmol, 1.5 equiv), 1,3-bis(diphenylphosphanyl)propane (16.9 mg, 0.04 mmol, 0.2 equiv), and  $\text{Mn}_2(\text{CO})_{10}$  (8.3 mg, 0.02 mmol, 0.1 equiv). The crude reaction mixture was purified by flash silica gel column chromatography (petroleum ether/EtOAc = 10:1) to afford the desired product **17** as white solid (44.6 mg, 70%).  $^1\text{H NMR}$  (300 MHz,  $\text{CDCl}_3$ )  $\delta$  7.84-7.73 (m, 2H), 7.61-7.55 (m, 1H), 7.35 (d,  $J = 7.8$  Hz, 2H), 7.14 (d,  $J = 3.2$  Hz, 1H), 6.58-6.45 (m, 1H), 4.35-4.20 (m, 2H), 3.15 (t,  $J = 6.9$  Hz, 2H), 2.45 (s, 3H), 1.95-1.76 (m, 4H);  $^{13}\text{C NMR}$  (75 MHz,  $\text{CDCl}_3$ )  $\delta$  158.3, 146.3, 144.6, 144.2, 135.7, 129.8, 127.9, 117.9, 111.7, 63.6, 55.5, 27.1, 21.5, 19.5. **HRMS** (ESI) calculated for  $\text{C}_{16}\text{H}_{18}\text{NaO}_5\text{S}$   $[\text{M}+\text{Na}]^+$   $m/z$  345.0767, found 345.0765.

#### 1-Methyl-4-((2-(phenylsulfonyl)ethyl)sulfonyl)benzene (**18**)

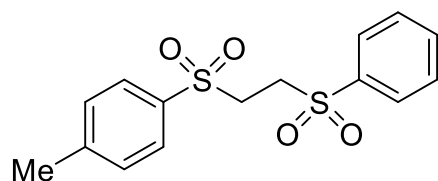

According to **GP** with (vinylsulfonyl)benzene (33.9 mg, 0.2 mmol, 1.0 equiv), 4-methylbenzenesulfonyl chloride (115.4 mg, 0.6 mmol, 3.0 equiv),  $(\text{Me}_3\text{Si})_3\text{SiH}$  (93  $\mu\text{L}$ , 0.3 mmol, 1.5 equiv), 1,3-bis(diphenylphosphanyl)propane (16.7 mg, 0.04 mmol, 0.2 equiv), and  $\text{Mn}_2(\text{CO})_{10}$  (8.1 mg, 0.02 mmol, 0.1 equiv). The reaction was conducted for 24 h. The crude reaction mixture was purified by flash silica gel column chromatography (petroleum ether/EtOAc = 10:1) to afford the desired product **18** as white solid (43.4 mg, 67%).  $^1\text{H NMR}$  (400 MHz,  $\text{CDCl}_3$ )  $\delta$  7.87 (d,  $J = 7.6$  Hz, 2H), 7.74 (d,  $J = 8.2$  Hz, 2H), 7.69 (d,  $J = 7.4$  Hz, 1H), 7.61-7.57 (m, 2H), 7.37 (d,  $J = 8.0$  Hz, 2H), 3.43 (s, 4H), 2.46 (s, 3H);  $^{13}\text{C NMR}$  (100 MHz,  $\text{CDCl}_3$ )  $\delta$  145.7, 138.0, 134.9, 134.4, 130.2, 129.6, 128.0, 127.98, 49.54, 49.50, 21.6. **HRMS** (ESI) calculated for  $\text{C}_{15}\text{H}_{16}\text{NaO}_4\text{S}_2$   $[\text{M}+\text{Na}]^+$   $m/z$  347.0382, found 347.0383.



### Benzyl 3-tosylpropanoate (**19**)

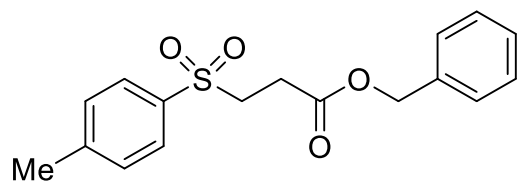

According to **GP** with benzyl acrylate (30  $\mu$ L, 0.2 mmol, 1.0 equiv), 4-methylbenzenesulfonyl chloride (57.6 mg, 0.3 mmol, 1.5 equiv),  $(\text{Me}_3\text{Si})_3\text{SiH}$  (93  $\mu$ L, 0.3 mmol, 1.5 equiv), 1,3-bis(diphenylphosphanyl)propane (16.8 mg, 0.04 mmol, 0.2 equiv), and  $\text{Mn}_2(\text{CO})_{10}$  (8.0 mg, 0.02 mmol, 0.1 equiv). The crude reaction mixture was purified by flash silica gel column chromatography (petroleum ether/EtOAc = 10:1) to afford the desired product **19** as white solid (63.1 mg, 94%).  $^1\text{H NMR}$  (400 MHz,  $\text{CDCl}_3$ )  $\delta$  7.81-7.73 (m, 2H), 7.38-7.30 (m, 7H), 5.06 (s, 2H), 3.42 (t,  $J = 7.8$  Hz, 2H), 2.77 (t,  $J = 7.6$  Hz, 2H), 2.43 (s, 3H);  $^{13}\text{C NMR}$  (100 MHz,  $\text{CDCl}_3$ )  $\delta$  169.8, 145.0, 135.4, 135.1, 129.9, 128.5, 128.4, 128.3, 128.1, 67.0, 51.4, 27.9, 21.5. **HRMS** (ESI) calculated for  $\text{C}_{17}\text{H}_{18}\text{NaO}_4\text{S}$   $[\text{M}+\text{Na}]^+$   $m/z$  341.0818, found 341.0812.

### 1,3-Diphenyl-3-tosylpropan-1-one (**20**)<sup>[5]</sup>

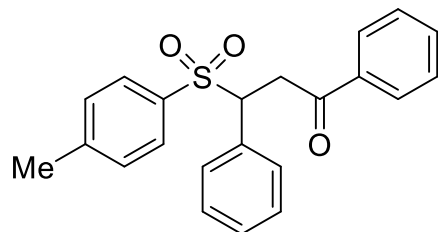

According to **GP** with (*E*)-chalcone (41.9 mg, 0.2 mmol, 1.0 equiv), 4-methylbenzenesulfonyl chloride (57.8 mg, 0.3 mmol, 1.5 equiv),  $(\text{Me}_3\text{Si})_3\text{SiH}$  (93  $\mu$ L, 0.3 mmol, 1.5 equiv), 1,3-bis(diphenylphosphanyl)propane (16.9 mg, 0.04 mmol, 0.2 equiv), and  $\text{Mn}_2(\text{CO})_{10}$  (7.9 mg, 0.02 mmol, 0.1 equiv). The crude reaction mixture was purified by flash silica gel column chromatography (petroleum ether/EtOAc = 20:1) to afford the desired product **20** as white solid (58.3 mg, 80%).  $^1\text{H NMR}$  (400 MHz,  $\text{CDCl}_3$ )  $\delta$  7.97-7.90 (m, 2H), 7.59-7.56 (m, 1H), 7.48-7.41 (m, 4H), 7.26-7.16 (m, 7H), 4.91 (dd,  $J = 9.7, 3.5$  Hz, 1H), 4.11 (dd,  $J = 17.8, 3.5$  Hz, 1H), 3.93 (dd,  $J = 17.8, 9.7$  Hz, 1H), 2.39 (s, 3H);  $^{13}\text{C NMR}$  (100 MHz,  $\text{CDCl}_3$ )  $\delta$  194.9, 144.7, 136.2, 134.0, 133.6, 132.6, 129.8, 129.4, 129.0, 128.7, 128.4, 128.1, 66.5, 37.0, 21.6. **MS** (ESI)  $m/z$  365.2  $[\text{M}+\text{H}]^+$ .

### Trimethyl(2-tosylethyl)silane (**21**)

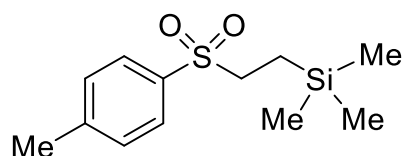

According to **GP** with trimethyl(vinyl)silane (29  $\mu\text{L}$ , 0.2 mmol, 1.0 equiv), 4-methylbenzenesulfonyl chloride (57.6 mg, 0.3 mmol, 1.5 equiv),  $(\text{Me}_3\text{Si})_3\text{SiH}$  (93  $\mu\text{L}$ , 0.3 mmol, 1.5 equiv), 1,3-bis(diphenylphosphanyl)propane (16.7 mg, 0.04 mmol, 0.2 equiv), and  $\text{Mn}_2(\text{CO})_{10}$  (8.1 mg, 0.02 mmol, 0.1 equiv). The crude reaction mixture was purified by flash silica gel column chromatography (petroleum ether/EtOAc = 30:1) to afford the desired product **21** as pale yellow oil (51.0 mg, 97%).  $^1\text{H NMR}$  (400 MHz,  $\text{CDCl}_3$ )  $\delta$  8.02-7.88 (m, 2H), 7.58-7.48 (m, 2H), 3.15-3.11 (m, 2H), 2.61 (s, 3H), 1.09-1.04 (m, 2H), 0.15 (s, 9H);  $^{13}\text{C NMR}$  (100 MHz,  $\text{CDCl}_3$ )  $\delta$  144.4, 135.7, 129.8, 128.2, 52.7, 21.6, 9.1, -2.1. **HRMS** (ESI) calculated for  $\text{C}_{21}\text{H}_{24}\text{NO}_2\text{SSi}$   $[\text{M}+\text{NH}_4]^+$   $m/z$  274.1292, found 274.1288.

### Phenyl(2-tosylethyl)sulfane (**22**)

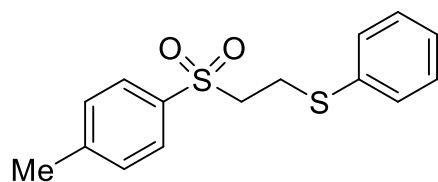

According to **GP** with phenyl(vinyl)sulfane (26  $\mu\text{L}$ , 0.2 mmol, 1.0 equiv), 4-methylbenzenesulfonyl chloride (57.6 mg, 0.3 mmol, 1.5 equiv),  $(\text{Me}_3\text{Si})_3\text{SiH}$  (93  $\mu\text{L}$ , 0.3 mmol, 1.5 equiv), 1,3-bis(diphenylphosphanyl)propane (16.8 mg, 0.04 mmol, 0.2 equiv), and  $\text{Mn}_2(\text{CO})_{10}$  (8.2 mg, 0.02 mmol, 0.1 equiv). The crude reaction mixture was purified by flash silica gel column chromatography (petroleum ether/EtOAc = 30:1) to afford the desired product **22** as white solid (49.5 mg, 85%).  $^1\text{H NMR}$  (400 MHz,  $\text{CDCl}_3$ )  $\delta$  7.80-7.71 (m, 2H), 7.40-7.33 (m, 2H), 7.30-7.21 (m, 5H), 3.31-3.26 (m, 2H), 3.17-3.13 (m, 2H), 2.46 (s, 3H);  $^{13}\text{C NMR}$  (100 MHz,  $\text{CDCl}_3$ )  $\delta$  145.1, 135.6, 133.5, 130.2, 130.0, 129.3, 128.1, 127.2, 55.8, 26.4, 21.6. **HRMS** (ESI) calculated for  $\text{C}_{15}\text{H}_{16}\text{NaO}_2\text{S}_2$   $[\text{M}+\text{Na}]^+$   $m/z$  315.0484, found 315.0481.

### 1-Methoxy-4-(2-tosylethyl)benzene (23)

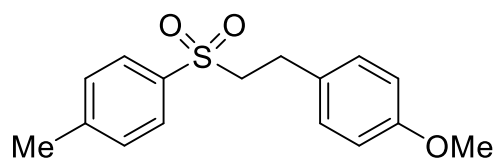

According to **GP** with 1-methoxy-4-vinylbenzene (27  $\mu\text{L}$ , 0.2 mmol, 1.0 equiv), 4-methylbenzenesulfonyl chloride (57.7 mg, 0.3 mmol, 1.5 equiv),  $(\text{Me}_3\text{Si})_3\text{SiH}$  (93  $\mu\text{L}$ , 0.3 mmol, 1.5 equiv), 1,3-bis(diphenylphosphanyl)propane (16.8 mg, 0.04 mmol, 0.2 equiv), and  $\text{Mn}_2(\text{CO})_{10}$  (8.2 mg, 0.02 mmol, 0.1 equiv). The crude reaction mixture was purified by flash silica gel column chromatography (petroleum ether/EtOAc = 30:1) to afford the desired product **23** as white solid (41.3 mg, 71%).  $^1\text{H NMR}$  (300 MHz,  $\text{CDCl}_3$ )  $\delta$  7.85-7.77 (m, 2H), 7.40-7.33 (m, 2H), 7.07-6.99 (m, 2H), 6.83-6.76 (m, 2H), 3.76 (s, 3H), 3.33-3.28 (m, 2H), 3.00-2.94 (m, 2H), 2.46 (s, 3H);  $^{13}\text{C NMR}$  (75 MHz,  $\text{CDCl}_3$ )  $\delta$  158.4, 144.7, 136.0, 129.9, 129.4, 129.2, 128.1, 114.1, 57.8, 55.2, 27.9, 21.6. **MS** (ESI)  $m/z$  291.2  $[\text{M}+\text{H}]^+$ .

### 1,3,5-Trimethyl-2-(2-tosylethyl)benzene (24)

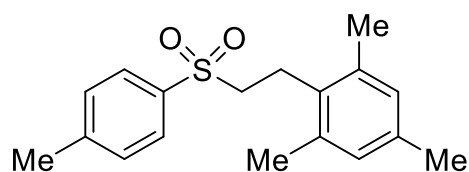

According to **GP** with 1,3,5-trimethyl-2-vinylbenzene (32  $\mu\text{L}$ , 0.2 mmol, 1.0 equiv), 4-methylbenzenesulfonyl chloride (57.9 mg, 0.3 mmol, 1.5 equiv),  $(\text{Me}_3\text{Si})_3\text{SiH}$  (93  $\mu\text{L}$ , 0.3 mmol, 1.5 equiv), 1,3-bis(diphenylphosphanyl)propane (16.8 mg, 0.04 mmol, 0.2 equiv), and  $\text{Mn}_2(\text{CO})_{10}$  (8.0 mg, 0.02 mmol, 0.1 equiv). The crude reaction mixture was purified by flash silica gel column chromatography (petroleum ether/EtOAc = 30:1) to afford the desired product **24** as white solid (47.8 mg, 79%).  $^1\text{H NMR}$  (300 MHz,  $\text{CDCl}_3$ )  $\delta$  7.91-7.80 (m, 2H), 7.45-7.33 (m, 2H), 6.79 (s, 2H), 3.15-3.06 (m, 2H), 3.03-2.94 (m, 2H), 2.47 (s, 3H), 2.21 (s, 3H), 2.13 (s, 6H);  $^{13}\text{C NMR}$  (75 MHz,  $\text{CDCl}_3$ )  $\delta$  144.7, 136.3, 136.0, 135.8, 131.0, 129.9, 129.1, 128.1, 54.7, 22.5, 21.6, 20.7, 19.3. **HRMS** (ESI) calculated for  $\text{C}_{18}\text{H}_{22}\text{NaO}_2\text{S}$   $[\text{M}+\text{Na}]^+$   $m/z$  325.1233, found 325.1230.

### 1-(Cyclopentylsulfonyl)-4-methylbenzene (25)<sup>[6]</sup>

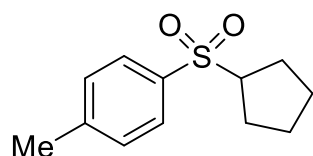

According to **GP** with cyclopentene (18  $\mu$ L, 0.2 mmol, 1.0 equiv), 4-methylbenzenesulfonyl chloride (57.6 mg, 0.3 mmol, 1.5 equiv),  $(\text{Me}_3\text{Si})_3\text{SiH}$  (93  $\mu$ L, 0.3 mmol, 1.5 equiv), 1,3-bis(diphenylphosphanyl)propane (16.6 mg, 0.04 mmol, 0.2 equiv), and  $\text{Mn}_2(\text{CO})_{10}$  (8.3 mg, 0.02 mmol, 0.1 equiv). The crude reaction mixture was purified by flash silica gel column chromatography (petroleum ether/EtOAc = 30:1) to afford the desired product **25** as colourless oil (35.8 mg, 80%).  $^1\text{H NMR}$  (400 MHz,  $\text{CDCl}_3$ )  $\delta$  7.82-7.74 (m, 2H), 7.38-7.31 (m, 2H), 3.51-3.43 (m, 1H), 2.45 (s, 3H), 2.10-2.01 (m, 2H), 1.91-1.85 (m, 2H), 1.82-1.71 (m, 2H), 1.64-1.54 (m, 2H);  $^{13}\text{C NMR}$  (75 MHz,  $\text{CDCl}_3$ )  $\delta$  144.3, 136.0, 129.7, 128.4, 64.2, 27.2, 25.8, 21.6. **MS** (ESI)  $m/z$  225.2  $[\text{M}+\text{H}]^+$ .

### 1-(Cyclohexylsulfonyl)-4-methylbenzene (26)<sup>[7]</sup>

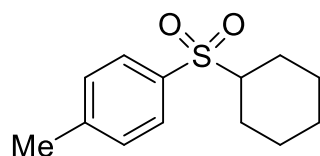

According to **GP** with cyclohexene (20  $\mu$ L, 0.2 mmol, 1.0 equiv), 4-methylbenzenesulfonyl chloride (57.6 mg, 0.3 mmol, 1.5 equiv),  $(\text{Me}_3\text{Si})_3\text{SiH}$  (93  $\mu$ L, 0.3 mmol, 1.5 equiv), 1,3-bis(diphenylphosphanyl)propane (16.9 mg, 0.04 mmol, 0.2 equiv), and  $\text{Mn}_2(\text{CO})_{10}$  (8.1 mg, 0.02 mmol, 0.1 equiv). The crude reaction mixture was purified by flash silica gel column chromatography (petroleum ether/EtOAc = 30:1) to afford the desired product **26** as pale yellow oil (22.0 mg, 46%).  $^1\text{H NMR}$  (400 MHz,  $\text{CDCl}_3$ )  $\delta$  7.78-7.70 (m, 2H), 7.38-7.32 (m, 2H), 2.91-2.84 (m, 1H), 2.45 (s, 3H), 2.07-2.05 (m, 2H), 1.87-1.83 (m, 2H), 1.70-1.65 (m, 1H), 1.44-1.34 (m, 2H), 1.29-1.07 (m, 3H);  $^{13}\text{C NMR}$  (100 MHz,  $\text{CDCl}_3$ )  $\delta$  144.4, 134.2, 129.6, 129.0, 63.5, 25.5, 25.1, 25.0, 21.6. **MS** (ESI)  $m/z$  239.1  $[\text{M}+\text{H}]^+$ .

### 2-Tosyl-1,2,3,4-tetrahydronaphthalene (27)

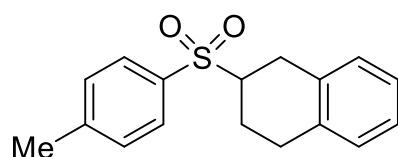

According to **GP** with 1,2-dihydronaphthalene (26  $\mu$ L, 0.2 mmol, 1.0 equiv), 4-methylbenzenesulfonyl chloride (57.9 mg, 0.3 mmol, 1.5 equiv),  $(\text{Me}_3\text{Si})_3\text{SiH}$  (93  $\mu$ L, 0.3 mmol, 1.5 equiv), 1,3-bis(diphenylphosphanyl)propane (16.7 mg, 0.04 mmol, 0.2 equiv), and  $\text{Mn}_2(\text{CO})_{10}$  (8.3 mg, 0.02 mmol, 0.1 equiv). The crude reaction mixture was purified by flash silica gel column chromatography (petroleum ether/EtOAc = 30:1) to afford the desired product **27** as white solid (31.9 mg, 55%).  $^1\text{H NMR}$  (300 MHz,  $\text{CDCl}_3$ )  $\delta$  7.85-7.77 (m, 2H), 7.42-7.34 (m, 2H), 7.12-7.02 (m, 4H), 3.36-3.26 (m, 1H), 3.09-2.89 (m, 3H), 2.86-2.75 (m, 1H), 2.46 (s, 3H), 2.41-2.33 (m, 1H), 1.87-1.72 (m, 1H);  $^{13}\text{C NMR}$  (75 MHz,  $\text{CDCl}_3$ )  $\delta$  144.8, 134.7, 133.8, 132.8, 129.8, 129.00, 128.98, 128.6, 126.3, 126.1, 60.5, 28.7, 28.2, 22.6, 21.6. **HRMS** (ESI) calculated for  $\text{C}_{17}\text{H}_{18}\text{NaO}_2\text{S}$   $[\text{M}+\text{H}]^+$   $m/z$  309.0920, found 309.0917.

### 2-Tosyl-2,3-dihydro-1H-indene (28)

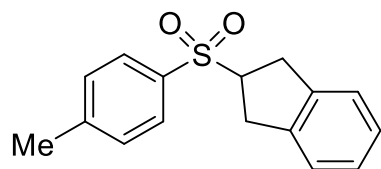

According to **GP** with 1H-indene (23  $\mu$ L, 0.2 mmol, 1.0 equiv), 4-methylbenzenesulfonyl chloride (57.8 mg, 0.3 mmol, 1.5 equiv),  $(\text{Me}_3\text{Si})_3\text{SiH}$  (93  $\mu$ L, 0.3 mmol, 1.5 equiv), 1,3-bis(diphenylphosphanyl)propane (16.7 mg, 0.04 mmol, 0.2 equiv), and  $\text{Mn}_2(\text{CO})_{10}$  (8.0 mg, 0.02 mmol, 0.1 equiv). The crude reaction mixture was purified by flash silica gel column chromatography (petroleum ether/EtOAc = 30:1) to afford the desired product **28** as white solid (29.2 mg, 54%).  $^1\text{H NMR}$  (300 MHz,  $\text{CDCl}_3$ )  $\delta$  7.84-7.76 (m, 2H), 7.37-7.29 (m, 2H), 7.17-7.09 (m, 4H), 4.05-3.94 (m, 1H), 3.49-3.41 (m, 2H), 3.20-3.12 (m, 2H), 2.42 (s, 3H);  $^{13}\text{C NMR}$  (75 MHz,  $\text{CDCl}_3$ )  $\delta$  144.6, 139.4, 134.9, 129.7, 128.3, 126.9, 124.1, 63.2, 33.5, 21.4. **HRMS** (ESI) calculated for  $\text{C}_{16}\text{H}_{20}\text{NO}_2\text{S}$   $[\text{M}+\text{HH}_4]^+$   $m/z$  290.1209, found 290.1205.

### (Hexylsulfonyl)benzene (29)<sup>[8]</sup>

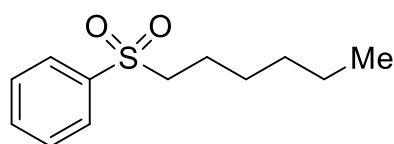

According to **GP** with hex-1-ene (25  $\mu$ L, 0.2 mmol, 1.0 equiv), benzenesulfonyl chloride (38  $\mu$ L, 0.3 mmol, 1.5 equiv),  $(\text{Me}_3\text{Si})_3\text{SiH}$  (93  $\mu$ L, 0.3 mmol, 1.5 equiv),

1,3-bis(diphenylphosphanyl)propane (16.9 mg, 0.04 mmol, 0.2 equiv), and  $\text{Mn}_2(\text{CO})_{10}$  (8.2 mg, 0.02 mmol, 0.1 equiv). The crude reaction mixture was purified by flash silica gel column chromatography (petroleum ether/EtOAc = 30:1) to afford the desired product **29** as pale yellow oil (34.1 mg, 75%).  $^1\text{H NMR}$  (300 MHz,  $\text{CDCl}_3$ )  $\delta$  7.97-7.87 (m, 2H), 7.69-7.64 (m, 1H), 7.60-7.55 (m, 2H), 3.11-3.06 (m, 2H), 1.76-1.65 (m, 2H), 1.40-1.34 (m, 2H), 1.31-1.22 (m, 4H), 0.85 (t,  $J = 6.8$  Hz, 3H);  $^{13}\text{C NMR}$  (75 MHz,  $\text{CDCl}_3$ )  $\delta$  139.1, 133.6, 129.2, 128.0, 56.2, 31.1, 27.9, 22.5, 22.2, 13.9. **MS** (ESI)  $m/z$  227.0  $[\text{M}+\text{H}]^+$ .

### 1-(Hexylsulfonyl)-4-methoxybenzene (**30**)

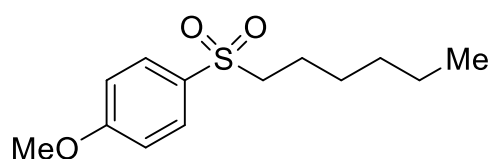

According to **GP** with hex-1-ene (25  $\mu\text{L}$ , 0.2 mmol, 1.0 equiv), 4-methoxybenzenesulfonyl chloride (62.5 mg, 0.3 mmol, 1.5 equiv),  $(\text{Me}_3\text{Si})_3\text{SiH}$  (93  $\mu\text{L}$ , 0.3 mmol, 1.5 equiv), 1,3-bis(diphenylphosphanyl)propane (16.7 mg, 0.04 mmol, 0.2 equiv), and  $\text{Mn}_2(\text{CO})_{10}$  (8.0 mg, 0.02 mmol, 0.1 equiv). The crude reaction mixture was purified by flash silica gel column chromatography (petroleum ether/EtOAc = 30:1) to afford the desired product **30** as pale yellow oil (37.3 mg, 73%).  $^1\text{H NMR}$  (300 MHz,  $\text{CDCl}_3$ )  $\delta$  7.87-7.78 (m, 2H), 7.06-6.98 (m, 2H), 3.89 (s, 3H), 3.08-3.03 (m, 2H), 1.74-1.63 (m, 2H), 1.39-1.23 (m, 6H), 0.85 (t,  $J = 6.8$  Hz, 3H);  $^{13}\text{C NMR}$  (100 MHz,  $\text{CDCl}_3$ )  $\delta$  163.6, 130.7, 130.1, 114.4, 56.6, 55.6, 31.1, 27.9, 22.7, 22.2, 13.9. **HRMS** (ESI) calculated for  $\text{C}_{13}\text{H}_{20}\text{NaO}_3\text{S}$   $[\text{M}+\text{Na}]^+$   $m/z$  279.1025, found 279.1022.

### 1-Fluoro-4-(hexylsulfonyl)benzene (**31**)<sup>[9]</sup>

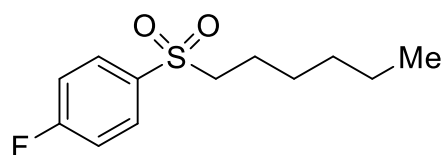

According to **GP** with hex-1-ene (25  $\mu\text{L}$ , 0.2 mmol, 1.0 equiv), 4-fluorobenzenesulfonyl chloride (58.6 mg, 0.3 mmol, 1.5 equiv),  $(\text{Me}_3\text{Si})_3\text{SiH}$  (93  $\mu\text{L}$ , 0.3 mmol, 1.5 equiv), 1,3-bis(diphenylphosphanyl)propane (16.6 mg, 0.04 mmol, 0.2 equiv), and  $\text{Mn}_2(\text{CO})_{10}$  (8.4 mg, 0.02 mmol, 0.1 equiv). The crude reaction mixture was purified by flash silica gel column chromatography (petroleum ether/EtOAc = 20:1) to afford the desired product **31** as pale yellow oil (44.4 mg,

90%).  $^1\text{H NMR}$  (400 MHz,  $\text{CDCl}_3$ )  $\delta$  7.98-7.88 (m, 2H), 7.29-7.21 (m, 2H), 3.10-3.06 (m, 2H), 1.74-1.66 (m, 2H), 1.40-1.32 (m, 2H), 1.31-1.20 (m, 4H), 0.86 (t,  $J = 6.8$  Hz, 3H);  $^{13}\text{C NMR}$  (75 MHz,  $\text{CDCl}_3$ )  $\delta$  165.7 (d,  $J = 256.1$  Hz), 135.2 (d,  $J = 3.3$  Hz), 130.9 (d,  $J = 9.6$  Hz), 116.5 (d,  $J = 22.6$  Hz), 56.4, 31.1, 27.9, 22.6, 22.2, 13.9.  $^{19}\text{F NMR}$  (282 MHz,  $\text{CDCl}_3$ )  $\delta$  -103.73; **MS** (ESI)  $m/z$  245.5  $[\text{M}+\text{H}]^+$ .

### 1-Chloro-4-(hexylsulfonyl)benzene (32)

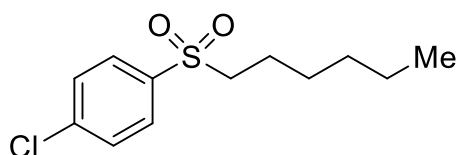

According to **GP** with hex-1-ene (25  $\mu\text{L}$ , 0.2 mmol, 1.0 equiv), 4-chlorobenzenesulfonyl chloride (63.6 mg, 0.3 mmol, 1.5 equiv),  $(\text{Me}_3\text{Si})_3\text{SiH}$  (93  $\mu\text{L}$ , 0.3 mmol, 1.5 equiv), 1,3-bis(diphenylphosphanyl)propane (16.8 mg, 0.04 mmol, 0.2 equiv), and  $\text{Mn}_2(\text{CO})_{10}$  (8.2 mg, 0.02 mmol, 0.1 equiv). The crude reaction mixture was purified by flash silica gel column chromatography (petroleum ether/EtOAc = 20:1) to afford the desired product **32** as colourless oil (31.6 mg, 61%).  $^1\text{H NMR}$  (400 MHz,  $\text{CDCl}_3$ )  $\delta$  7.87-7.82 (m, 2H), 7.58-7.52 (m, 2H), 3.10-3.06 (m, 2H), 1.74-1.66 (m, 2H), 1.40-1.32 (m, 2H), 1.31-1.21 (m, 4H), 0.86 (t,  $J = 6.9$  Hz, 3H);  $^{13}\text{C NMR}$  (100 MHz,  $\text{CDCl}_3$ )  $\delta$  140.3, 137.6, 129.55, 129.52, 56.3, 31.1, 27.9, 22.6, 22.2, 13.8. **HRMS** (ESI) calculated for  $\text{C}_{12}\text{H}_{21}\text{ClNO}_2\text{S}$   $[\text{M}+\text{NH}_4]^+$   $m/z$  278.0976, found 278.0971.

### 1-Bromo-4-(hexylsulfonyl)benzene (33)

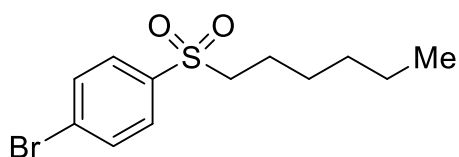

According to **GP** with hex-1-ene (25  $\mu\text{L}$ , 0.2 mmol, 1.0 equiv), 4-bromobenzenesulfonyl chloride (76.7 mg, 0.3 mmol, 1.5 equiv),  $(\text{Me}_3\text{Si})_3\text{SiH}$  (93  $\mu\text{L}$ , 0.3 mmol, 1.5 equiv), 1,3-bis(diphenylphosphanyl)propane (16.9 mg, 0.04 mmol, 0.2 equiv), and  $\text{Mn}_2(\text{CO})_{10}$  (8.3 mg, 0.02 mmol, 0.1 equiv). The crude reaction mixture was purified by flash silica gel column chromatography (petroleum ether/EtOAc = 20:1) to afford the desired product **33** as colourless oil (40.6 mg, 66%).  $^1\text{H NMR}$  (400 MHz,  $\text{CDCl}_3$ )  $\delta$  7.82-7.75 (m, 2H), 7.74-7.69 (m, 2H), 3.10-3.06 (m, 2H), 1.73-1.65 (m, 2H), 1.39-1.29 (m, 2H), 1.26-1.20 (m, 4H), 0.86 (t,  $J = 6.9$  Hz, 3H);  $^{13}\text{C NMR}$  (75 MHz,  $\text{CDCl}_3$ )  $\delta$  138.1, 132.5, 129.6, 128.8, 56.2, 31.0, 27.8, 22.5,

22.2, 13.8. **HRMS** (ESI) calculated for  $C_{12}H_{17}BrNaO_2S$   $[M+Na]^+$   $m/z$  327.0025, found 327.0023.

#### 4-(Hexylsulfonyl)-1,1'-biphenyl (**34**)<sup>[10]</sup>

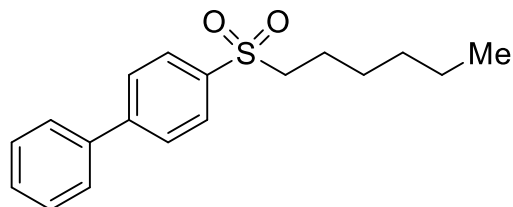

According to **GP** with hex-1-ene (25  $\mu$ L, 0.2 mmol, 1.0 equiv), [1,1'-biphenyl]-4-sulfonyl chloride (75.9 mg, 0.3 mmol, 1.5 equiv),  $(Me_3Si)_3SiH$  (93  $\mu$ L, 0.3 mmol, 1.5 equiv), 1,3-bis(diphenylphosphanyl)propane (16.6 mg, 0.04 mmol, 0.2 equiv), and  $Mn_2(CO)_{10}$  (8.2 mg, 0.02 mmol, 0.1 equiv). The crude reaction mixture was purified by flash silica gel column chromatography (petroleum ether/EtOAc = 30:1) to afford the desired product **34** as white solid (39.6 mg, 66%). **<sup>1</sup>H NMR** (300 MHz,  $CDCl_3$ )  $\delta$  7.97 (d,  $J = 8.1$  Hz, 2H), 7.77 (d,  $J = 8.1$  Hz, 2H), 7.62 (d,  $J = 7.1$  Hz, 2H), 7.51-7.41 (m, 3H), 3.15-3.10 (m, 2H), 1.80-1.69 (m, 2H), 1.48-1.32 (m, 2H), 1.31-1.16 (m, 4H), 0.86 (t,  $J = 5.8$  Hz, 3H); **<sup>13</sup>C NMR** (75 MHz,  $CDCl_3$ )  $\delta$  146.5, 139.1, 137.6, 129.0, 128.6, 128.5, 127.8, 127.3, 56.4, 31.1, 27.9, 22.6, 22.2, 13.9. **MS** (ESI)  $m/z$  303.2  $[M+H]^+$ .

#### 1-(Hexylsulfonyl)-4-nitrobenzene (**35**)

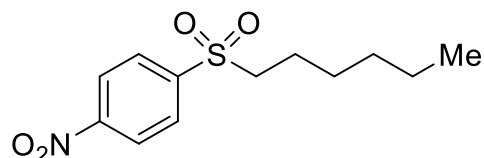

According to **GP** with hex-1-ene (25  $\mu$ L, 0.2 mmol, 1.0 equiv), 4-nitrobenzenesulfonyl chloride (66.5 mg, 0.3 mmol, 1.5 equiv),  $(Me_3Si)_3SiH$  (93  $\mu$ L, 0.3 mmol, 1.5 equiv), 1,3-bis(diphenylphosphanyl)propane (16.8 mg, 0.04 mmol, 0.2 equiv), and  $Mn_2(CO)_{10}$  (7.9 mg, 0.02 mmol, 0.1 equiv). The crude reaction mixture was purified by flash silica gel column chromatography (petroleum ether/EtOAc = 20:1) to afford the desired product **35** as brown yellow oil (22.1 mg, 41%). **<sup>1</sup>H NMR** (300 MHz,  $CDCl_3$ )  $\delta$  8.49-8.39 (m, 2H), 8.16-8.09 (m, 2H), 3.17-3.12 (m, 2H), 1.78-1.67 (m, 2H), 1.43-1.34 (m, 2H), 1.33-1.22 (m, 4H), 0.86 (t,  $J = 6.8$  Hz, 3H); **<sup>13</sup>C NMR** (75 MHz,  $CDCl_3$ )  $\delta$  150.8, 144.7, 129.6, 124.4, 56.2, 31.0, 27.8, 22.4, 22.2, 13.8. **HRMS** (ESI) calculated for  $C_{12}H_{17}NNaO_4S$   $[M+Na]^+$   $m/z$  294.0770, found



294.0774.

### 1-(Hexylsulfonyl)-3-methoxybenzene (36)

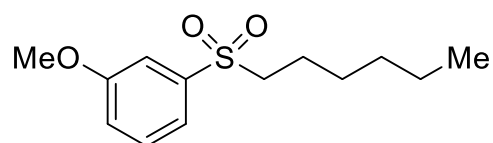

According to **GP** with hex-1-ene (25  $\mu$ L, 0.2 mmol, 1.0 equiv), 3-methoxybenzenesulfonyl chloride (43  $\mu$ L, 0.3 mmol, 1.5 equiv),  $(\text{Me}_3\text{Si})_3\text{SiH}$  (93  $\mu$ L, 0.3 mmol, 1.5 equiv), 1,3-bis(diphenylphosphanyl)propane (17.0 mg, 0.04 mmol, 0.2 equiv), and  $\text{Mn}_2(\text{CO})_{10}$  (8.2 mg, 0.02 mmol, 0.1 equiv). The crude reaction mixture was purified by flash silica gel column chromatography (petroleum ether/EtOAc = 30:1) to afford the desired product **36** as colourless oil (42.2 mg, 82%).  $^1\text{H NMR}$  (400 MHz,  $\text{CDCl}_3$ )  $\delta$  7.50-7.45 (m, 2H), 7.42-7.38 (m, 1H), 7.20-7.14 (m, 1H), 3.88 (s, 3H), 3.10-3.06 (m, 2H), 1.75-1.67 (m, 2H), 1.39-1.32 (m, 2H), 1.31-1.23 (m, 4H), 0.86 (t,  $J = 6.8$  Hz, 3H);  $^{13}\text{C NMR}$  (100 MHz,  $\text{CDCl}_3$ )  $\delta$  160.0, 140.4, 130.3, 120.1, 120.0, 112.4, 56.2, 55.7, 31.1, 27.9, 22.5, 22.2, 13.9. **HRMS** (ESI) calculated for  $\text{C}_{13}\text{H}_{20}\text{NaO}_3\text{S}$   $[\text{M}+\text{Na}]^+$   $m/z$  279.1025, found 279.1023.

### 1-(Hexylsulfonyl)-2-methoxybenzene (37)

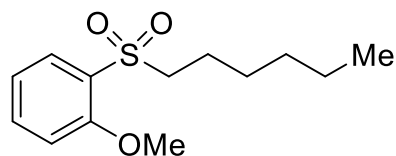

According to **GP** with hex-1-ene (25  $\mu$ L, 0.2 mmol, 1.0 equiv), 2-methoxybenzenesulfonyl chloride (63.2 mg, 0.3 mmol, 1.5 equiv),  $(\text{Me}_3\text{Si})_3\text{SiH}$  (93  $\mu$ L, 0.3 mmol, 1.5 equiv), 1,3-bis(diphenylphosphanyl)propane (16.8 mg, 0.04 mmol, 0.2 equiv), and  $\text{Mn}_2(\text{CO})_{10}$  (8.3 mg, 0.02 mmol, 0.1 equiv). The crude reaction mixture was purified by flash silica gel column chromatography (petroleum ether/EtOAc = 30:1) to afford the desired product **37** as pale yellow oil (34.4 mg, 67%).  $^1\text{H NMR}$  (400 MHz,  $\text{CDCl}_3$ )  $\delta$  7.96 (dd,  $J = 7.8, 1.6$  Hz, 1H), 7.61-7.57 (m, 1H), 7.11 (t,  $J = 7.6$  Hz, 1H), 7.05 (d,  $J = 8.4$  Hz, 1H), 3.98 (s, 3H), 3.36-3.32 (m, 2H), 1.72-1.64 (m, 2H), 1.40-1.33 (m, 2H), 1.30-1.21 (m, 4H), 0.86 (t,  $J = 6.9$  Hz, 3H);  $^{13}\text{C NMR}$  (75 MHz,  $\text{CDCl}_3$ )  $\delta$  157.2, 135.4, 130.5, 126.8, 120.7, 122.2, 56.2, 54.3, 31.1, 27.9, 22.3, 22.2, 13.9. **HRMS** (ESI) calculated for  $\text{C}_{13}\text{H}_{20}\text{NaO}_3\text{S}$   $[\text{M}+\text{Na}]^+$   $m/z$  279.1025, found 279.1030.

## 2-(Hexylsulfonyl)naphthalene (**38**)<sup>[9]</sup>

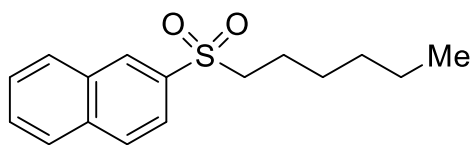

According to **GP** with hex-1-ene (25  $\mu$ L, 0.2 mmol, 1.0 equiv), naphthalene-2-sulfonyl chloride (68.4 mg, 0.3 mmol, 1.5 equiv),  $(\text{Me}_3\text{Si})_3\text{SiH}$  (93  $\mu$ L, 0.3 mmol, 1.5 equiv), 1,3-bis(diphenylphosphanyl)propane (16.9 mg, 0.04 mmol, 0.2 equiv), and  $\text{Mn}_2(\text{CO})_{10}$  (8.0 mg, 0.02 mmol, 0.1 equiv). The crude reaction mixture was purified by flash silica gel column chromatography (petroleum ether/EtOAc = 30:1) to afford the desired product **38** as white solid (40.9 mg, 74%). **<sup>1</sup>H NMR** (300 MHz,  $\text{CDCl}_3$ )  $\delta$  8.49 (d,  $J = 0.6$  Hz, 1H), 8.03-7.99 (m, 2H), 7.95-7.92 (m, 1H), 7.87 (dd,  $J = 8.7, 1.8$  Hz, 1H), 7.70-7.60 (m, 2H), 3.19-3.14 (m, 2H), 1.79-1.68 (m, 2H), 1.40-1.28 (m, 2H), 1.25-1.19 (m, 4H), 0.83 (t,  $J = 6.9$  Hz, 3H); **<sup>13</sup>C NMR** (100 MHz,  $\text{CDCl}_3$ )  $\delta$  136.0, 135.2, 132.1, 129.7, 129.5, 129.3, 129.2, 127.9, 127.6, 122.7, 56.3, 31.1, 27.9, 22.6, 22.2, 13.8. **MS** (ESI)  $m/z$  277.1  $[\text{M}+\text{H}]^+$ .

## 5-(Hexylsulfonyl)-2,3-dihydrobenzofuran (**39**)

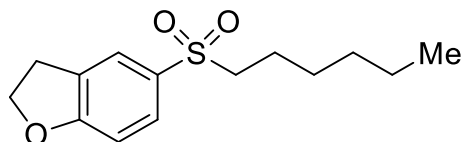

According to **GP** with hex-1-ene (25  $\mu$ L, 0.2 mmol, 1.0 equiv), 2,3-dihydrobenzofuran-5-sulfonyl chloride (65.6 mg, 0.3 mmol, 1.5 equiv),  $(\text{Me}_3\text{Si})_3\text{SiH}$  (93  $\mu$ L, 0.3 mmol, 1.5 equiv), 1,3-bis(diphenylphosphanyl)propane (16.7 mg, 0.04 mmol, 0.2 equiv), and  $\text{Mn}_2(\text{CO})_{10}$  (8.4 mg, 0.02 mmol, 0.1 equiv). The crude reaction mixture was purified by flash silica gel column chromatography (petroleum ether/EtOAc = 20:1) to afford the desired product **39** as yellow oil (54.8 mg, 94%). **<sup>1</sup>H NMR** (400 MHz,  $\text{CDCl}_3$ )  $\delta$  7.70 (s, 1H), 7.67 (d,  $J = 9.0$  Hz, 1H), 6.88 (d,  $J = 8.4$  Hz, 1H), 4.70 (t,  $J = 8.8$  Hz, 2H), 3.28 (t,  $J = 8.8$  Hz, 2H), 3.06-3.02 (m, 2H), 1.73-1.65 (m, 2H), 1.39-1.31 (m, 2H), 1.30-1.20 (m, 4H), 0.86 (t,  $J = 6.7$  Hz, 3H); **<sup>13</sup>C NMR** (100 MHz,  $\text{CDCl}_3$ )  $\delta$  164.5, 130.7, 129.7, 128.5, 125.2, 109.6, 72.3, 56.7, 31.1, 28.9, 27.9, 22.8, 22.3, 13.9. **HRMS** (ESI) calculated for  $\text{C}_{14}\text{H}_{20}\text{NaO}_3\text{S}$   $[\text{M}+\text{H}]^+$   $m/z$  291.1025, found 291.1024.

## 2-(Hexylsulfonyl)thiophene (40)

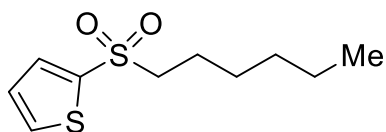

According to **GP** with hex-1-ene (25  $\mu$ L, 0.2 mmol, 1.0 equiv), thiophene-2-sulfonyl chloride (55.1 mg, 0.3 mmol, 1.5 equiv),  $(\text{Me}_3\text{Si})_3\text{SiH}$  (93  $\mu$ L, 0.3 mmol, 1.5 equiv), 1,3-bis(diphenylphosphanyl)propane (16.7 mg, 0.04 mmol, 0.2 equiv), and  $\text{Mn}_2(\text{CO})_{10}$  (8.1 mg, 0.02 mmol, 0.1 equiv). The crude reaction mixture was purified by flash silica gel column chromatography (petroleum ether/EtOAc = 30:1) to afford the desired product **40** as yellow oil (44.2 mg, 95%).  **$^1\text{H}$  NMR** (300 MHz,  $\text{CDCl}_3$ )  $\delta$  7.72 (d,  $J = 5.0$  Hz, 1H), 7.69 (d,  $J = 3.8$  Hz, 1H), 7.18-7.15 (m, 1H), 3.22-3.17 (m, 2H), 1.82-1.72 (m, 2H), 1.43-1.34 (m, 2H), 1.33-1.26 (m, 4H), 0.87 (t,  $J = 6.6$  Hz, 3H);  **$^{13}\text{C}$  NMR** (75 MHz,  $\text{CDCl}_3$ )  $\delta$  140.2, 133.9, 133.8, 127.8, 57.7, 31.1, 27.8, 22.9, 22.2, 13.9. **HRMS** (ESI) calculated for  $\text{C}_{10}\text{H}_{20}\text{NO}_2\text{S}_2$   $[\text{M}+\text{NH}_4]^+$   $m/z$  250.0930, found 250.0930.

## 3-(Hexylsulfonyl)pyridine (41)

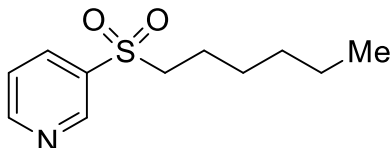

According to **GP** with hex-1-ene (25  $\mu$ L, 0.2 mmol, 1.0 equiv), pyridine-3-sulfonyl chloride (36  $\mu$ L, 0.3 mmol, 1.5 equiv),  $(\text{Me}_3\text{Si})_3\text{SiH}$  (93  $\mu$ L, 0.3 mmol, 1.5 equiv), 1,3-bis(diphenylphosphanyl)propane (16.8 mg, 0.04 mmol, 0.2 equiv), and  $\text{Mn}_2(\text{CO})_{10}$  (8.0 mg, 0.02 mmol, 0.1 equiv). The crude reaction mixture was purified by flash silica gel column chromatography (petroleum ether/EtOAc = 20:1) to afford the desired product **41** as yellow oil (30.0 mg, 66%).  **$^1\text{H}$  NMR** (400 MHz,  $\text{CDCl}_3$ )  $\delta$  9.12 (d,  $J = 1.8$  Hz, 1H), 8.89 (dd,  $J = 4.6, 1.0$  Hz, 1H), 8.20 (dt,  $J = 8.0, 1.7$  Hz, 1H), 7.54 (dd,  $J = 7.9, 4.9$  Hz, 1H), 3.15-3.11 (m, 2H), 1.77-1.70 (m, 2H), 1.42-1.34 (m, 2H), 1.33-1.26 (m, 4H), 0.86 (t,  $J = 6.8$  Hz, 3H);  **$^{13}\text{C}$  NMR** (75 MHz,  $\text{CDCl}_3$ )  $\delta$  154.2, 149.1, 135.9, 135.6, 123.8, 56.6, 31.1, 27.8, 22.5, 22.2, 13.8. **HRMS** (ESI) calculated for  $\text{C}_{11}\text{H}_{18}\text{NO}_2\text{S}$   $[\text{M}+\text{Na}]^+$   $m/z$  228.1053, found 228.1052.

### (3-(Cyclopropylsulfonyl)propyl)benzene (42)

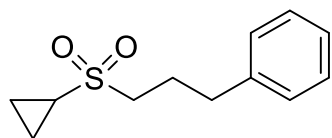

According to **GP** with allylbenzene (27  $\mu\text{L}$ , 0.2 mmol, 1.0 equiv), cyclopropanesulfonyl chloride (31  $\mu\text{L}$ , 0.3 mmol, 1.5 equiv),  $(\text{Me}_3\text{Si})_3\text{SiH}$  (93  $\mu\text{L}$ , 0.3 mmol, 1.5 equiv), 1,3-bis(diphenylphosphanyl)propane (16.6 mg, 0.04 mmol, 0.2 equiv), and  $\text{Mn}_2(\text{CO})_{10}$  (8.0 mg, 0.02 mmol, 0.1 equiv). The crude reaction mixture was purified by flash silica gel column chromatography (petroleum ether/EtOAc = 30:1) to afford the desired product **42** as pale yellow oil (28.8 mg, 69%).  $^1\text{H NMR}$  (400 MHz,  $\text{CDCl}_3$ )  $\delta$  7.33-7.29 (m, 2H), 7.24-7.18 (m, 3H), 3.04-3.00 (m, 2H), 2.79 (t,  $J = 7.4$  Hz, 2H), 2.37-2.31 (m, 1H), 2.25-2.18 (m, 2H), 1.24-1.20 (m, 2H), 1.03-0.98 (m, 2H);  $^{13}\text{C NMR}$  (100 MHz,  $\text{CDCl}_3$ )  $\delta$  139.9, 128.6, 128.4, 126.4, 53.1, 34.3, 29.2, 23.7, 4.5. **HRMS** (ESI) calculated for  $\text{C}_{12}\text{H}_{16}\text{NaO}_2\text{S}$   $[\text{M}+\text{Na}]^+$   $m/z$  247.0763, found 247.0759.

### (3-(Ethylsulfonyl)propyl)benzene (43)<sup>[11]</sup>

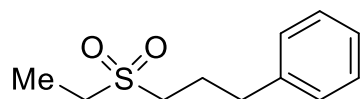

According to **GP** with allylbenzene (27  $\mu\text{L}$ , 0.2 mmol, 1.0 equiv), ethanesulfonyl chloride (57  $\mu\text{L}$ , 0.6 mmol, 3.0 equiv),  $(\text{Me}_3\text{Si})_3\text{SiH}$  (93  $\mu\text{L}$ , 0.3 mmol, 1.5 equiv), 1,3-bis(diphenylphosphanyl)propane (16.7 mg, 0.04 mmol, 0.2 equiv), and  $\text{Mn}_2(\text{CO})_{10}$  (8.2 mg, 0.02 mmol, 0.1 equiv). The reaction was conducted for 24 h. The crude reaction mixture was purified by flash silica gel column chromatography (petroleum ether/EtOAc = 30:1) to afford the desired product **43** as pale yellow oil (15.7 mg, 37%).  $^1\text{H NMR}$  (300 MHz,  $\text{CDCl}_3$ )  $\delta$  7.33-7.26 (m, 2H), 7.24-7.17 (m, 3H), 2.98-2.89 (m, 4H), 2.77 (t,  $J = 7.4$  Hz, 2H), 2.21-2.11 (m, 2H), 1.34 (t,  $J = 7.5$  Hz, 3H);  $^{13}\text{C NMR}$  (75 MHz,  $\text{CDCl}_3$ )  $\delta$  139.7, 128.5, 128.3, 126.3, 50.8, 46.9, 34.1, 23.3, 6.4. **MS** (ESI)  $m/z$  213.0  $[\text{M}+\text{H}]^+$ .

### (3-((3-Chloropropyl)sulfonyl)propyl)benzene (44)

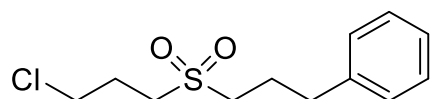

According to **GP** with allylbenzene (27  $\mu\text{L}$ , 0.2 mmol, 1.0 equiv), 3-chloropropane-1-sulfonyl chloride (73  $\mu\text{L}$ , 0.6 mmol, 3.0 equiv),  $(\text{Me}_3\text{Si})_3\text{SiH}$  (93  $\mu\text{L}$ , 0.3 mmol, 1.5 equiv), 1,3-bis(diphenylphosphanyl)propane (16.7 mg, 0.04 mmol, 0.2 equiv), and  $\text{Mn}_2(\text{CO})_{10}$  (8.1 mg, 0.02 mmol, 0.1 equiv). The reaction was conducted for 24 h. The crude reaction mixture was purified by flash silica gel column chromatography (petroleum ether/EtOAc = 20:1) to afford the desired product **44** as yellow solid (18.2 mg, 35%).  $^1\text{H NMR}$  (400 MHz,  $\text{CDCl}_3$ )  $\delta$  7.32-7.28 (m, 2H), 7.25-7.17 (m, 3H), 3.64 (t,  $J = 6.2$  Hz, 2H), 3.10-3.06 (m, 2H), 2.97-2.93 (m, 2H), 2.77 (t,  $J = 7.4$  Hz, 2H), 2.28-2.21 (m, 2H), 2.20-2.13 (m, 2H);  $^{13}\text{C NMR}$  (75 MHz,  $\text{CDCl}_3$ )  $\delta$  139.6, 128.5, 128.2, 126.3, 52.1, 49.6, 42.8, 33.9, 24.7, 23.3. **HRMS** (ESI) calculated for  $\text{C}_{12}\text{H}_{17}\text{ClNaO}_2\text{S}$   $[\text{M}+\text{Na}]^+$   $m/z$  283.0530, found 283.0528.

### 5-Tosylpentyl 3-(4,5-diphenyloxazol-2-yl)propanoate (**45**)

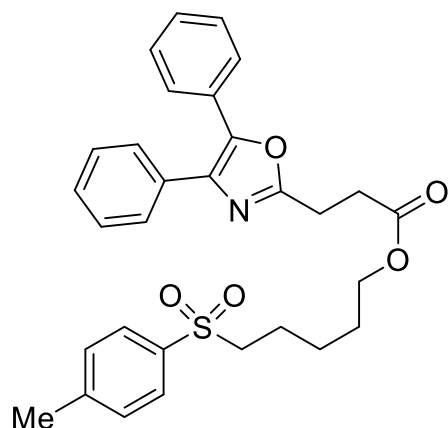

According to **GP** with pent-4-en-1-yl 3-(4,5-diphenyloxazol-2-yl)propanoate (72.6 mg, 0.2 mmol, 1.0 equiv), 4-methylbenzenesulfonyl chloride (57.6 mg, 0.3 mmol, 1.5 equiv),  $(\text{Me}_3\text{Si})_3\text{SiH}$  (93  $\mu\text{L}$ , 0.3 mmol, 1.5 equiv), 1,3-bis(diphenylphosphanyl)propane (16.9 mg, 0.04 mmol, 0.2 equiv), and  $\text{Mn}_2(\text{CO})_{10}$  (8.2 mg, 0.02 mmol, 0.1 equiv). The crude reaction mixture was purified by flash silica gel column chromatography (petroleum ether/EtOAc = 3:1) to afford the desired product **45** as white solid (57.7 mg, 56%).  $^1\text{H NMR}$  (300 MHz,  $\text{CDCl}_3$ )  $\delta$  7.82-7.71 (m, 2H), 7.63-7.60 (m, 2H), 7.58-7.54 (m, 2H), 7.38-7.27 (m, 8H), 4.08 (t,  $J = 6.4$  Hz, 2H), 3.16 (t,  $J = 7.4$  Hz, 2H), 3.02-2.97 (m, 2H), 2.88 (t,  $J = 7.4$  Hz, 2H), 2.44 (s, 3H), 1.75-1.56 (m, 4H), 1.45-1.37 (m, 2H);  $^{13}\text{C NMR}$  (75 MHz,  $\text{CDCl}_3$ )  $\delta$  171.9, 161.6, 145.3, 144.6, 136.0, 135.0, 132.3, 129.8, 128.8, 128.6, 128.5, 128.4, 128.0, 127.9, 127.7, 126.3, 64.1, 56.0, 31.0, 28.0, 24.7, 23.4, 22.3, 21.5. **HRMS** (ESI) calculated for  $\text{C}_{30}\text{H}_{31}\text{NNaO}_5\text{S}$   $[\text{M}+\text{Na}]^+$   $m/z$  540.1815, found 540.1805.

### 5-Tosylpentyl 2-(11-oxo-6,11-dihydrodibenzo[*b,e*]oxepin-2-yl)acetate (46)

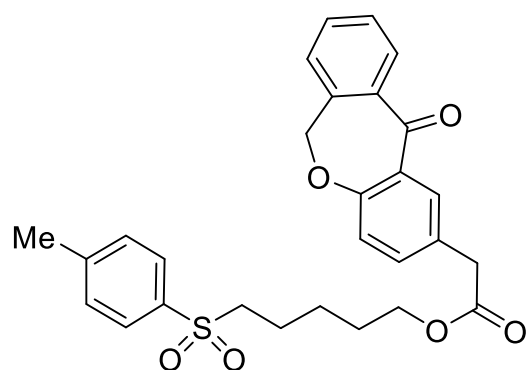

According to **GP** with pent-4-en-1-yl 2-(11-oxo-6,11-dihydrodibenzo[*b,e*]oxepin-2-yl)acetate (67.9 mg, 0.2 mmol, 1.0 equiv), 4-methylbenzenesulfonyl chloride (57.8 mg, 0.3 mmol, 1.5 equiv),  $(\text{Me}_3\text{Si})_3\text{SiH}$  (93  $\mu\text{L}$ , 0.3 mmol, 1.5 equiv), 1,3-bis(diphenylphosphanyl)propane (16.9 mg, 0.04 mmol, 0.2 equiv), and  $\text{Mn}_2(\text{CO})_{10}$  (8.0 mg, 0.02 mmol, 0.1 equiv). The crude reaction mixture was purified by flash silica gel column chromatography (petroleum ether/EtOAc = 10:1) to afford the desired product **46** as white solid (72.7 mg, 74%).  $^1\text{H NMR}$  (300 MHz,  $\text{CDCl}_3$ )  $\delta$  8.10 (d,  $J = 2.1$  Hz, 1H), 7.88 (d,  $J = 7.3$  Hz, 1H), 7.80-7.72 (m, 2H), 7.56 (t,  $J = 7.4$  Hz, 1H), 7.47 (t,  $J = 7.2$  Hz, 1H), 7.42-7.32 (m, 4H), 7.02 (d,  $J = 8.4$  Hz, 1H), 5.18 (s, 2H), 4.05 (t,  $J = 6.4$  Hz, 2H), 3.61 (s, 2H), 3.09-3.04 (m, 2H), 2.43 (s, 3H), 1.77-1.66 (m, 2H), 1.63-1.56 (m, 2H), 1.46-1.36 (m, 2H);  $^{13}\text{C NMR}$  (75 MHz,  $\text{CDCl}_3$ )  $\delta$  190.8, 171.3, 160.4, 144.6, 140.3, 136.3, 136.0, 135.5, 132.8, 132.3, 129.8, 129.4, 129.2, 128.0, 127.8, 127.7, 125.0, 121.0, 73.5, 64.3, 56.0, 40.1, 28.0, 24.7, 22.4, 21.6. **HRMS** (ESI) calculated for  $\text{C}_{28}\text{H}_{28}\text{NaO}_6\text{S}$   $[\text{M}+\text{Na}]^+$   $m/z$  515.1499, found 515.1490.

### 5-Tosylpentyl 2-(4-(4-chlorobenzoyl)phenoxy)-2-methylpropanoate (47)

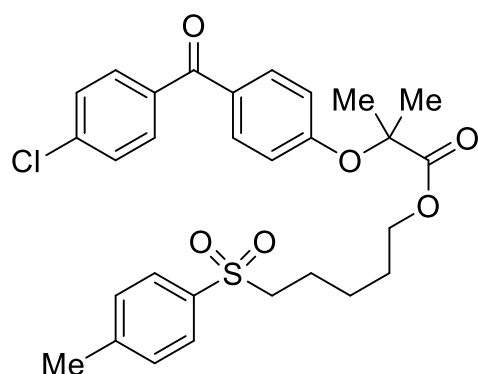

According to **GP** with pent-4-en-1-yl

2-(4-(4-chlorobenzoyl)phenoxy)-2-methylpropanoate (77.6 mg, 0.2 mmol, 1.0 equiv), 4-methylbenzenesulfonyl chloride (58.0 mg, 0.3 mmol, 1.5 equiv),  $(\text{Me}_3\text{Si})_3\text{SiH}$  (93  $\mu\text{L}$ , 0.3 mmol, 1.5 equiv), 1,3-bis(diphenylphosphanyl)propane (16.8 mg, 0.04 mmol, 0.2 equiv), and  $\text{Mn}_2(\text{CO})_{10}$  (8.4 mg, 0.02 mmol, 0.1 equiv). The crude reaction mixture was purified by flash silica gel column chromatography (petroleum ether/EtOAc = 10:1) to afford the desired product **47** as white solid (91.7 mg, 81%).  **$^1\text{H}$  NMR** (400 MHz,  $\text{CDCl}_3$ )  $\delta$  7.76-7.68 (m, 6H), 7.49-7.41 (m, 2H), 7.34 (d,  $J = 8.0$  Hz, 2H), 6.90-6.78 (m, 2H), 4.12 (t,  $J = 6.4$  Hz, 2H), 2.99-2.95 (m, 2H), 2.44 (s, 3H), 1.70-1.55 (m, 4H), 1.66 (s, 6H), 1.33-1.25 (m, 2H);  **$^{13}\text{C}$  NMR** (75 MHz,  $\text{CDCl}_3$ )  $\delta$  194.0, 173.5, 159.5, 144.6, 138.2, 136.1, 135.9, 131.9, 131.0, 130.2, 129.8, 128.4, 127.9, 117.0, 79.2, 65.0, 55.8, 27.8, 25.3, 24.5, 22.2, 21.5. **HRMS** (ESI) calculated for  $\text{C}_{29}\text{H}_{31}\text{ClNaO}_6\text{S}$   $[\text{M}+\text{Na}]^+$   $m/z$  565.1422, found 565.1413.

#### 5-Tosylpentyl 5-(2,5-dimethylphenoxy)-2,2-dimethylpentanoate (**48**)

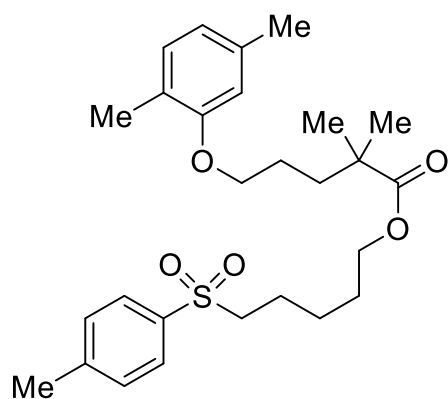

According to **GP** with pent-4-en-1-yl 5-(2,5-dimethylphenoxy)-2,2-dimethylpentanoate (63.9 mg, 0.2 mmol, 1.0 equiv), 4-methylbenzenesulfonyl chloride (57.6 mg, 0.3 mmol, 1.5 equiv),  $(\text{Me}_3\text{Si})_3\text{SiH}$  (93  $\mu\text{L}$ , 0.3 mmol, 1.5 equiv), 1,3-bis(diphenylphosphanyl)propane (16.9 mg, 0.04 mmol, 0.2 equiv), and  $\text{Mn}_2(\text{CO})_{10}$  (8.0 mg, 0.02 mmol, 0.1 equiv). The crude reaction mixture was purified by flash silica gel column chromatography (petroleum ether/EtOAc = 10:1) to afford the desired product **48** as yellow oil (74.3 mg, 78%).  **$^1\text{H}$  NMR** (300 MHz,  $\text{CDCl}_3$ )  $\delta$  7.80-7.72 (m, 2H), 7.38-7.30 (m, 2H), 6.98 (d,  $J = 7.4$  Hz, 1H), 6.65 (d,  $J = 7.5$  Hz, 1H), 6.60 (s, 1H), 4.01 (t,  $J = 6.4$  Hz, 2H), 3.92-3.89 (m, 2H), 3.07-3.02 (m, 2H), 2.44 (s, 3H), 2.30 (s, 3H), 2.15 (s, 3H), 1.78-1.73 (m, 6H), 1.65-1.56 (m, 2H), 1.47-1.38 (m, 2H), 1.19 (s, 6H);  **$^{13}\text{C}$  NMR** (100 MHz,  $\text{CDCl}_3$ )  $\delta$  177.7, 156.9, 144.6, 136.5, 136.2, 130.3, 129.9, 128.0, 123.5, 120.7, 111.9, 67.9, 63.8, 56.2, 42.0, 37.0, 28.2, 25.2, 25.1, 24.9, 22.5, 21.6, 21.4, 15.7. **HRMS** (ESI) calculated

for C<sub>27</sub>H<sub>38</sub>NaO<sub>5</sub>S [M+Na]<sup>+</sup> m/z 497.2332, found 497.2325.

### 5-Tosylpentyl 2-(3-cyano-4-isobutoxyphenyl)-4-methylthiazole-5-carboxylate (**49**)

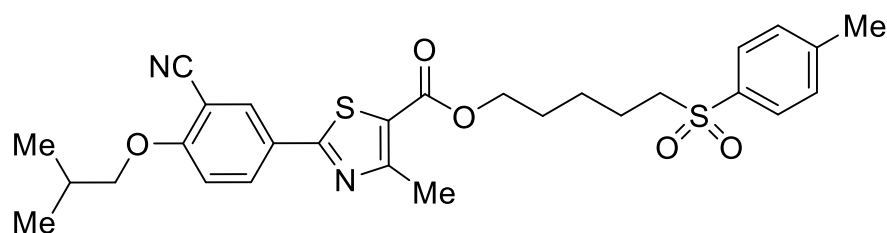

According to **GP** with pent-4-en-1-yl 2-(3-cyano-4-isobutoxyphenyl)-4-methylthiazole-5-carboxylate (77.5 mg, 0.2 mmol, 1.0 equiv), 4-methylbenzenesulfonyl chloride (57.7 mg, 0.3 mmol, 1.5 equiv), (Me<sub>3</sub>Si)<sub>3</sub>SiH (93 μL, 0.3 mmol, 1.5 equiv), 1,3-bis(diphenylphosphanyl)propane (16.7 mg, 0.04 mmol, 0.2 equiv), and Mn<sub>2</sub>(CO)<sub>10</sub> (8.4 mg, 0.02 mmol, 0.1 equiv). The crude reaction mixture was purified by flash silica gel column chromatography (petroleum ether/EtOAc = 4:1) to afford the desired product **49** as white solid (67.5 mg, 62%). <sup>1</sup>H NMR (400 MHz, CDCl<sub>3</sub>) δ 8.17 (d, *J* = 2.0 Hz, 1H), 8.09 (d, *J* = 8.8 Hz, 1H), 7.84-7.74 (m, 2H), 7.40-7.32 (m, 2H), 7.02 (d, *J* = 8.9 Hz, 1H), 4.26 (t, *J* = 6.3 Hz, 2H), 3.90 (d, *J* = 6.4 Hz, 2H), 3.13-3.09 (m, 2H), 2.74 (s, 3H), 2.45 (s, 3H), 2.25-2.15 (m, 1H), 1.84-1.71 (m, 4H), 1.57-1.50 (m, 2H), 1.09 (d, *J* = 6.7 Hz, 6H); <sup>13</sup>C NMR (75 MHz, CDCl<sub>3</sub>) δ 167.1, 162.4, 161.8, 161.1, 144.6, 136.0, 132.5, 131.9, 129.8, 127.9, 125.7, 121.4, 115.3, 112.5, 102.7, 75.5, 64.6, 56.0, 28.1, 28.0, 24.8, 22.4, 21.5, 18.9, 17.3. HRMS (ESI) calculated for C<sub>28</sub>H<sub>32</sub>N<sub>2</sub>NaO<sub>5</sub>S<sub>2</sub> [M+Na]<sup>+</sup> m/z 563.1645, found 563.1639.

### 5-Tosylpentyl 2-(1-(4-chlorobenzoyl)-5-methoxy-2-methyl-1*H*-indol-3-yl)acetate (**50**)

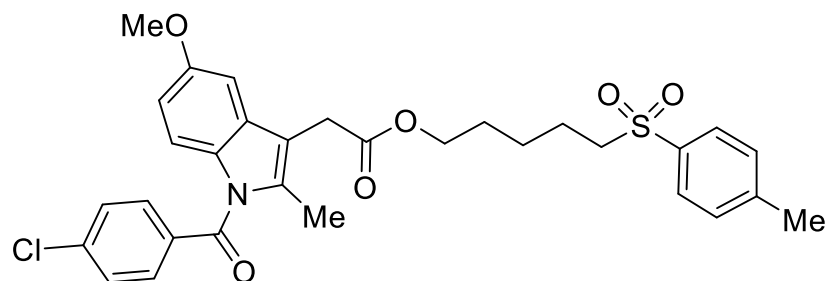

According to **GP** with pent-4-en-1-yl 2-(1-(4-chlorobenzoyl)-5-methoxy-2-methyl-1*H*-indol-3-yl)acetate (85.6 mg, 0.2 mmol, 1.0 equiv), 4-methylbenzenesulfonyl chloride (57.9 mg, 0.3 mmol, 1.5 equiv), (Me<sub>3</sub>Si)<sub>3</sub>SiH (93 μL, 0.3 mmol, 1.5 equiv), 1,3-bis(diphenylphosphanyl)propane (16.8



mg, 0.04 mmol, 0.2 equiv), and  $\text{Mn}_2(\text{CO})_{10}$  (8.3 mg, 0.02 mmol, 0.1 equiv). The crude reaction mixture was purified by flash silica gel column chromatography (petroleum ether/EtOAc = 3:1) to afford the desired product **50** as white solid (66.6 mg, 57%).  $^1\text{H NMR}$  (400 MHz,  $\text{CDCl}_3$ )  $\delta$  7.79-7.72 (m, 2H), 7.68-7.62 (m, 2H), 7.50-7.44 (m, 2H), 7.38-7.31 (m, 2H), 6.94 (d,  $J = 2.5$  Hz, 1H), 6.86 (d,  $J = 9.0$  Hz, 1H), 6.65 (d,  $J = 9.0$ , 2.5 Hz, 1H), 4.05 (t,  $J = 6.4$  Hz, 2H), 3.81 (s, 3H), 3.64 (s, 2H), 2.99-2.95 (m, 2H), 2.44 (s, 3H), 2.37 (s, 3H), 1.71-1.63 (m, 2H), 1.62-1.55 (m, 2H), 1.39-1.31 (m, 2H);  $^{13}\text{C NMR}$  (75 MHz,  $\text{CDCl}_3$ )  $\delta$  170.8, 168.2, 155.9, 144.6, 139.2, 136.0, 135.9, 133.8, 131.1, 130.7, 130.6, 129.9, 129.1, 128.0, 114.9, 112.5, 111.3, 101.4, 64.3, 56.0, 55.6, 30.3, 28.0, 24.7, 22.3, 21.6, 13.3. **HRMS** (ESI) calculated for  $\text{C}_{31}\text{H}_{32}\text{ClNaO}_6\text{S}$   $[\text{M}+\text{Na}]^+$   $m/z$  604.1531, found 604.1523.

#### 5-Tosylpentyl 2-(4-(2,2-dichlorocyclopropyl)phenoxy)-2-methylpropanoate (**51**)

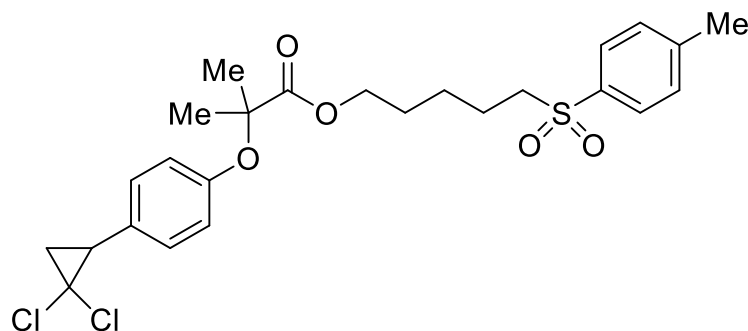

According to **GP** with pent-4-en-1-yl 2-(4-(2,2-dichlorocyclopropyl)phenoxy)-2-methylpropanoate (71.9 mg, 0.2 mmol, 1.0 equiv), 4-methylbenzenesulfonyl chloride (57.6 mg, 0.3 mmol, 1.5 equiv),  $(\text{Me}_3\text{Si})_3\text{SiH}$  (93  $\mu\text{L}$ , 0.3 mmol, 1.5 equiv), 1,3-bis(diphenylphosphanyl)propane (16.6 mg, 0.04 mmol, 0.2 equiv), and  $\text{Mn}_2(\text{CO})_{10}$  (7.9 mg, 0.02 mmol, 0.1 equiv). The crude reaction mixture was purified by flash silica gel column chromatography (petroleum ether/EtOAc = 10:1) to afford the desired product **51** as white solid (70.2 mg, 68%).  $^1\text{H NMR}$  (400 MHz,  $\text{CDCl}_3$ )  $\delta$  7.81-7.71 (m, 2H), 7.43-7.31 (m, 2H), 7.16-7.02 (m, 2H), 6.82-6.70 (m, 2H), 4.09 (t,  $J = 6.4$  Hz, 2H), 2.99-2.94 (m, 2H), 2.84-2.79 (m, 1H), 2.45 (s, 3H), 1.92 (dd,  $J = 10.6$ , 7.5 Hz, 1H), 1.77 (t,  $J = 7.9$  Hz, 1H), 1.68-1.52 (m, 4H), 1.58 (s, 6H), 1.30-1.23 (m, 2H);  $^{13}\text{C NMR}$  (100 MHz,  $\text{CDCl}_3$ )  $\delta$  174.1, 154.9, 144.6, 136.0, 129.8, 129.5, 127.9, 118.2, 78.9, 64.7, 60.8, 56.0, 34.7, 27.8, 25.7, 25.3, 24.5, 22.2, 21.5. **HRMS** (ESI) calculated for  $\text{C}_{25}\text{H}_{30}\text{Cl}_2\text{NaO}_5\text{S}$   $[\text{M}+\text{Na}]^+$   $m/z$  535.1083, found 535.1075.

**5-Tosylpentyl 6-(3-((3*r*,5*r*,7*r*)-adamantan-1-yl)-4-methoxyphenyl)-2-naphthoate (52)**

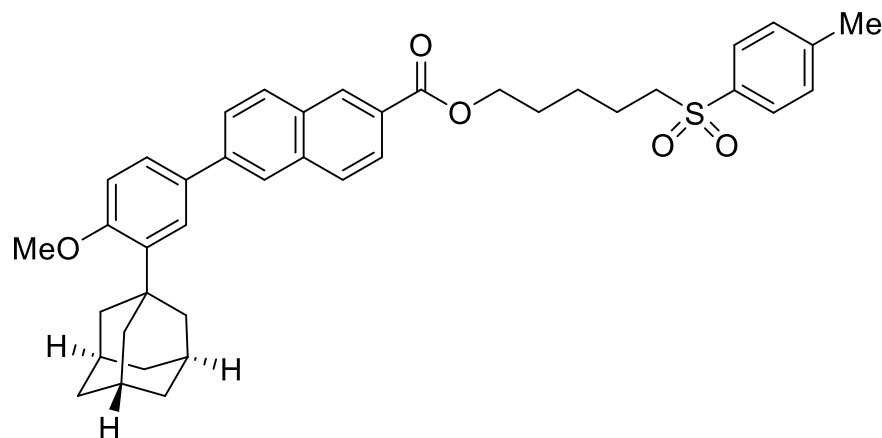

According to **GP** with pent-4-en-1-yl 6-(3-((3*r*,5*r*,7*r*)-adamantan-1-yl)-4-methoxyphenyl)-2-naphthoate (96.7 mg, 0.2 mmol, 1.0 equiv), 4-methylbenzenesulfonyl chloride (58.1 mg, 0.3 mmol, 1.5 equiv), (Me<sub>3</sub>Si)<sub>3</sub>SiH (93 μL, 0.3 mmol, 1.5 equiv), 1,3-bis(diphenylphosphanyl)propane (16.7 mg, 0.04 mmol, 0.2 equiv), and Mn<sub>2</sub>(CO)<sub>10</sub> (8.1 mg, 0.02 mmol, 0.1 equiv). The crude reaction mixture was purified by flash silica gel column chromatography (petroleum ether/EtOAc = 10:1) to afford the desired product **52** as white solid (76.8 mg, 60%). <sup>1</sup>H NMR (300 MHz, CDCl<sub>3</sub>) δ 8.49 (s, 1H), 7.97-7.89 (m, 3H), 7.82 (d, *J* = 8.7 Hz, 1H), 7.73-7.68 (m, 3H), 7.52 (d, *J* = 2.3 Hz, 1H), 7.46 (dd, *J* = 8.4, 2.2 Hz, 1H), 7.28-7.20 (m, 2H), 6.91 (d, *J* = 8.5 Hz, 1H), 4.26 (t, *J* = 6.4 Hz, 2H), 3.81 (s, 3H), 3.06-3.01 (m, 2H), 2.34 (s, 3H), 2.15-2.07 (m, 6H), 2.06-1.97 (m, 3H), 1.79-1.68 (m, 10H), 1.54-1.44 (m, 2H); <sup>13</sup>C NMR (75 MHz, CDCl<sub>3</sub>) δ 166.7, 158.9, 144.6, 141.3, 138.9, 136.0, 135.9, 132.4, 131.1, 130.7, 129.9, 129.6, 128.2, 128.0, 126.9, 126.4, 125.9, 125.7, 125.4, 124.6, 112.0, 64.5, 56.2, 55.1, 40.5, 37.1, 37.0, 29.0, 28.3, 25.0, 22.6, 21.6. HRMS (ESI) calculated for C<sub>40</sub>H<sub>44</sub>NaO<sub>5</sub>S [M+Na]<sup>+</sup> *m/z* 659.2802, found 659.2803.

**(8*R*,9*S*,13*S*,14*S*)-13-Methyl-3-((5-tosylpentyl)oxy)-6,7,8,9,11,12,13,14,15,16-decahydro-17*H*-cyclopenta[*a*]phenanthren-17-one (53)**

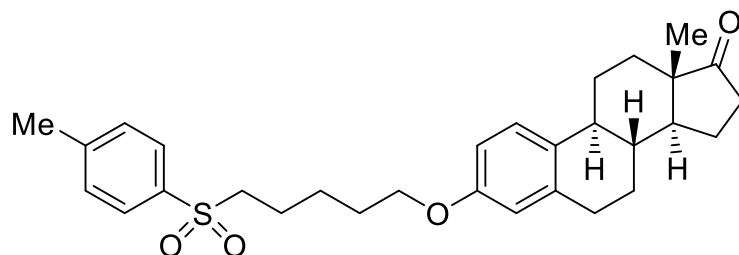

According to GP with (8*R*,9*S*,13*S*,14*S*)-13-methyl-3-(pent-4-en-1-yloxy)-6,7,8,9,11,12,13,14,15,16-decahydro-17*H*-cyclopenta[*a*]phenanthren-17-one (67.9 mg, 0.2 mmol, 1.0 equiv), 4-methylbenzenesulfonyl chloride (57.8 mg, 0.3 mmol, 1.5 equiv), (Me<sub>3</sub>Si)<sub>3</sub>SiH (93 μL, 0.3 mmol, 1.5 equiv), 1,3-bis(diphenylphosphanyl)propane (16.7 mg, 0.04 mmol, 0.2 equiv), and Mn<sub>2</sub>(CO)<sub>10</sub> (8.3 mg, 0.02 mmol, 0.1 equiv). The crude reaction mixture was purified by flash silica gel column chromatography (petroleum ether/EtOAc = 20:1) to afford the desired product **53** as white solid (90.2 mg, 88%). <sup>1</sup>H NMR (400 MHz, CDCl<sub>3</sub>) δ 7.83-7.74 (m, 2H), 7.39-7.32 (m, 2H), 7.17 (d, *J* = 8.6 Hz, 1H), 6.65 (dd, *J* = 8.5, 2.4 Hz, 1H), 6.59 (d, *J* = 2.0 Hz, 1H), 3.89 (t, *J* = 6.1 Hz, 2H), 3.11-3.07 (m, 2H), 2.94-2.83 (m, 2H), 2.53-2.37 (m, 2H), 2.48 (s, 3H), 2.26-1.93 (m, 5H), 1.81-1.70 (m, 4H), 1.64-1.37 (m, 8H), 0.90 (s, 3H); <sup>13</sup>C NMR (75 MHz, CDCl<sub>3</sub>) δ 220.9, 156.7, 144.5, 137.6, 136.0, 131.9, 129.8, 127.9, 126.2, 114.3, 111.9, 67.0, 56.1, 50.2, 47.9, 43.8, 38.2, 35.8, 31.4, 29.5, 28.6, 26.4, 25.8, 24.9, 22.5, 21.53, 21.46, 13.7. HRMS (ESI) calculated for C<sub>30</sub>H<sub>42</sub>NO<sub>4</sub>S [M+NH<sub>4</sub>]<sup>+</sup> *m/z* 512.2829, found 512.2816.

#### 5-((3,5-Dimethylphenoxy)methyl)-3-(5-tosylpentyl)oxazolidin-2-one (**54**)

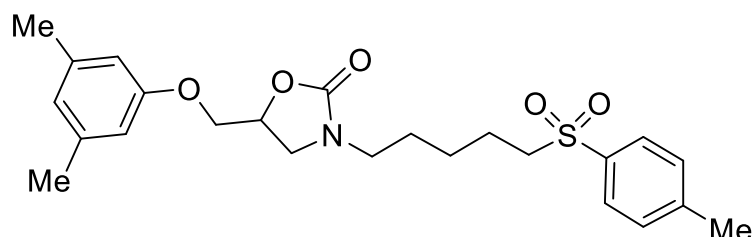

According to GP with 5-((3,5-dimethylphenoxy)methyl)-3-(pent-4-en-1-yl)oxazolidin-2-one (58.4 mg, 0.2 mmol, 1.0 equiv), 4-methylbenzenesulfonyl chloride (57.8 mg, 0.3 mmol, 1.5 equiv), (Me<sub>3</sub>Si)<sub>3</sub>SiH (93 μL, 0.3 mmol, 1.5 equiv), 1,3-bis(diphenylphosphanyl)propane (16.7 mg, 0.04 mmol, 0.2 equiv), and Mn<sub>2</sub>(CO)<sub>10</sub> (8.2 mg, 0.02 mmol, 0.1 equiv). The crude reaction mixture was purified by flash silica gel column chromatography (petroleum ether/EtOAc = 3:1) to afford the desired product **54** as colourless oil (72.2 mg, 81%). <sup>1</sup>H NMR (300 MHz, CDCl<sub>3</sub>) δ 7.82-7.69 (m, 2H), 7.41-7.29 (m, 2H), 6.62 (s, 1H), 6.50 (s, 2H), 4.83-4.75 (m, 1H), 4.06 (d, *J* = 4.5 Hz, 2H), 3.65 (t, *J* = 8.8 Hz, 1H), 3.48 (dd, *J* = 8.6, 5.9 Hz, 1H), 3.32-3.15 (m, 2H), 3.08-3.03 (m, 2H), 2.44 (s, 3H), 2.27 (s, 6H), 1.78-1.68 (m, 2H), 1.60-1.50 (m, 2H), 1.46-1.38 (m, 2H); <sup>13</sup>C NMR (75 MHz, CDCl<sub>3</sub>) δ 158.0, 157.4, 144.5, 139.2, 135.9, 129.8, 127.8, 123.1, 112.1, 70.6,

67.8, 55.8, 46.3, 43.5, 26.6, 25.1, 22.3, 21.4, 21.2. **HRMS** (ESI) calculated for  $C_{24}H_{31}NNaO_5S$   $[M+Na]^+$   $m/z$  468.1815, found 468.1808.

### *Synthesis of an intermediate for the preparation of Eletriptan:*

#### **5-(2-Tosylethyl)-1H-indole (56)**

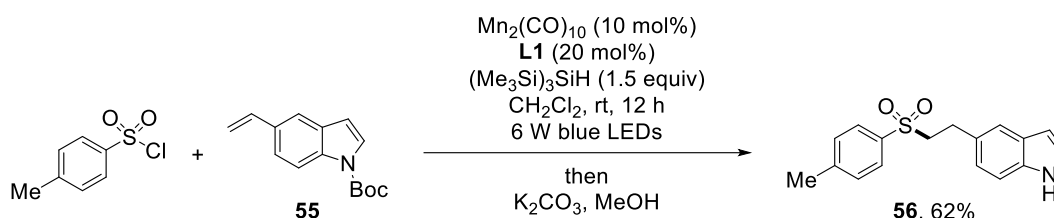

*tert*-Butyl 5-vinyl-1H-indole-1-carboxylate (48.9 mg, 0.2 mmol, 1.0 equiv), 4-methylbenzenesulfonyl chloride (58.1 mg, 0.3 mmol, 1.5 equiv),  $(Me_3Si)_3SiH$  (93  $\mu$ L, 0.3 mmol, 1.5 equiv), 1,3-bis(diphenylphosphanyl)propane **L1** (16.5 mg, 0.04 mmol, 0.2 equiv), and  $Mn_2(CO)_{10}$  (8.2 mg, 0.02 mmol, 0.1 equiv) were placed in a dry 10 mL Schlenk tube under a nitrogen atmosphere. Then anhydrous  $CH_2Cl_2$  (2.0 mL) was added with a syringe. The reaction mixture was stirred and irradiated by using 6 W blue LEDs at room temperature for 12 h. After completion of the reaction, the solvent was removed under reduced pressure, and the residue was purified by flash silica gel column chromatography (petroleum ether/EtOAc = 20/1) to afford hydrosulfonylated product (55.9 mg, 69%).

Then, hydrosulfonylated product (79.7 mg, 0.2 mmol, 1.0 equiv),  $K_2CO_3$  (82.9 mg, 0.6 mmol, 3.0 equiv) were placed in a dry 10 mL tube. Then MeOH (10.0 mL) was added with a syringe. The reaction mixture was refluxed for 6 h. After completion of the reaction, the solvent was removed under reduced pressure, and the residue was purified by flash silica gel column chromatography (petroleum ether/EtOAc = 5/1) to afford the desired product **56** as white solid (60.3 mg, 90%). Two steps: 62% yield.  $^1H$  NMR (300 MHz,  $CDCl_3$ )  $\delta$  8.36 (brs, 1H), 7.85-7.76 (m, 2H), 7.37-7.29 (m, 3H), 7.26 (d,  $J = 8.3$  Hz, 1H), 7.15 (t,  $J = 2.9$  Hz, 1H), 6.88 (d,  $J = 8.4$ , 1.6 Hz, 1H), 6.43-6.41 (m, 1H), 3.40-3.35 (m, 2H), 3.12-3.06 (m, 2H), 2.43 (s, 3H);  $^{13}C$  NMR (75 MHz,  $CDCl_3$ )  $\delta$  144.7, 135.9, 134.6, 129.8, 128.4, 128.0, 127.9, 124.9, 122.1, 119.8, 111.4, 101.9, 58.3, 28.9, 21.5. **HRMS** (ESI) calculated for  $C_{17}H_{17}NNaO_2S$   $[M+Na]^+$   $m/z$  322.0872, found 322.0873.

### 5-(2-(Phenylsulfonyl)ethyl)-1*H*-indole (**57**)<sup>[13]</sup>

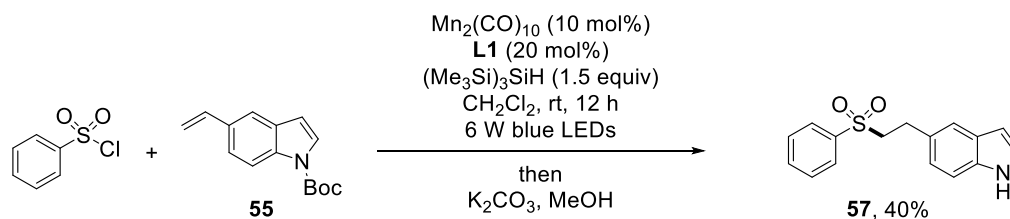

*tert*-Butyl 5-vinyl-1*H*-indole-1-carboxylate (48.8 mg, 0.2 mmol, 1.0 equiv), benzenesulfonyl chloride (38  $\mu\text{L}$ , 0.3 mmol, 1.5 equiv),  $(\text{Me}_3\text{Si})_3\text{SiH}$  (93  $\mu\text{L}$ , 0.3 mmol, 1.5 equiv), 1,3-bis(diphenylphosphanyl)propane **L1** (16.8 mg, 0.04 mmol, 0.2 equiv), and  $\text{Mn}_2(\text{CO})_{10}$  (8.0 mg, 0.02 mmol, 0.1 equiv) were placed in a dry 10 mL Schlenk tube under a nitrogen atmosphere. Then anhydrous  $\text{CH}_2\text{Cl}_2$  (2.0 mL) was added with a syringe. The reaction mixture was stirred and irradiated by using 6 W blue LEDs at room temperature for 12 h. After completion of the reaction, the solvent was removed under reduced pressure, and the residue was purified by flash silica gel column chromatography (petroleum ether/EtOAc = 20/1) to afford hydrosulfonylated product (39.1 mg, 50%).

Then, hydrosulfonylated product (77.3 mg, 0.2 mmol, 1.0 equiv),  $\text{K}_2\text{CO}_3$  (138.5 mg, 1.0 mmol, 5.0 equiv) were placed in a dry 10 mL tube. Then MeOH (10.0 mL) was added with a syringe. The reaction mixture was refluxed for 12 h. After completion of the reaction, the solvent was removed under reduced pressure, and the residue was purified by flash silica gel column chromatography (petroleum ether/EtOAc = 5/1) to afford the desired product **57** as white solid (45.9 mg, 80%). Two steps: 40% yield. **<sup>1</sup>H NMR** (300 MHz,  $\text{CDCl}_3$ )  $\delta$  8.27 (brs, 1H), 7.99-7.91 (m, 2H), 7.68-7.63 (m, 1H), 7.58-7.53 (m, 2H), 7.34 (s, 1H), 7.27 (d,  $J = 8.3$  Hz, 1H), 7.17 (t,  $J = 2.8$  Hz, 1H), 6.90 (dd,  $J = 8.4, 1.5$  Hz, 1H), 6.45-6.43 (m, 1H), 3.43-3.37 (m, 2H), 3.14-3.09 (m, 2H); **<sup>13</sup>C NMR** (75 MHz,  $\text{CDCl}_3$ )  $\delta$  139.0, 134.7, 133.7, 129.3, 128.5, 128.1, 128.0, 124.9, 122.3, 120.0, 111.3, 102.1, 58.3, 28.8. **HRMS** (ESI) calculated for  $\text{C}_{16}\text{H}_{15}\text{NNaO}_2\text{S}$   $[\text{M}+\text{Na}]^+$   $m/z$  308.0716, found 308.0708.

## Mechanistic studies

### 1) Radical trapping experiment:

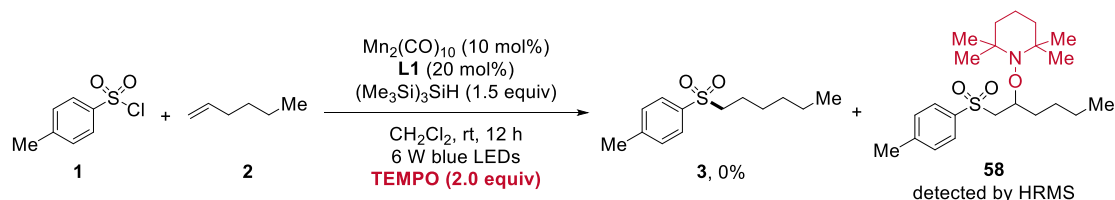

Hex-1-ene (25  $\mu\text{L}$ , 0.2 mmol, 1.0 equiv), 4-methylbenzenesulfonyl chloride (57.9 mg, 0.3 mmol, 1.5 equiv),  $(\text{Me}_3\text{Si})_3\text{SiH}$  (93  $\mu\text{L}$ , 0.3 mmol, 1.5 equiv), 1,3-bis(diphenylphosphanyl)propane **L1** (16.7 mg, 0.04 mmol, 0.2 equiv),  $\text{Mn}_2(\text{CO})_{10}$  (8.0 mg, 0.02 mmol, 0.1 equiv), and 2,2,6,6-tetramethyl-1-piperidinyloxy (TEMPO) (62.8 mg, 0.4 mmol, 2.0 equiv) were placed in a dry 10 mL Schlenk tube under a nitrogen atmosphere. Then anhydrous  $\text{CH}_2\text{Cl}_2$  (2.0 mL) was added with a syringe. The reaction mixture was stirred and irradiated by using 6 W blue LEDs at room temperature for 12 h. In this reaction, the formation of **3** was completely suppressed. Moreover, high-resolution mass spectra (HRMS) analysis of this reaction mixture showed that the TEMPO-trapped product **58** was formed. This result indicated that a stepwise mechanism that proceeds through a carbon-centered radical intermediate was involved in this reaction.

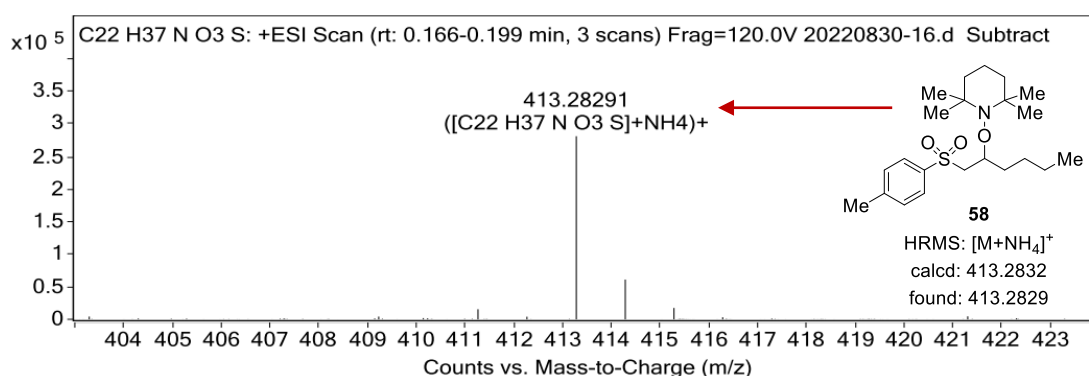

### 2) Radical clock experiments:

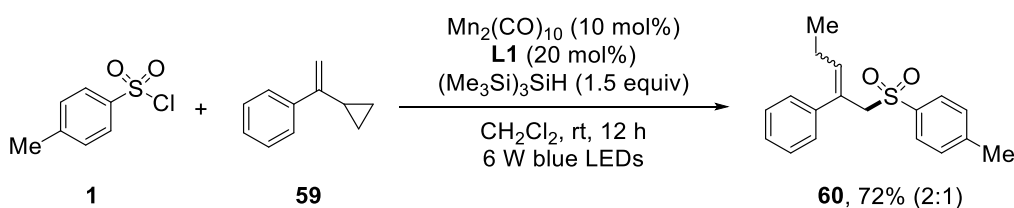

(1-Cyclopropylvinyl)benzene (29.9 mg, 0.2 mmol, 1.0 equiv), 4-methylbenzenesulfonyl chloride (57.8 mg, 0.3 mmol, 1.5 equiv),  $(\text{Me}_3\text{Si})_3\text{SiH}$  (93  $\mu\text{L}$ , 0.3 mmol, 1.5 equiv), 1,3-bis(diphenylphosphanyl)propane **L1** (16.8 mg, 0.04 mmol, 0.2 equiv), and  $\text{Mn}_2(\text{CO})_{10}$  (8.0 mg, 0.02 mmol, 0.1 equiv) were placed in a dry 10 mL Schlenk tube under a nitrogen atmosphere. Then anhydrous  $\text{CH}_2\text{Cl}_2$  (2.0 mL) was added with a syringe. The reaction mixture was stirred and irradiated by using 6 W blue LEDs at room temperature for 12 h. After completion of the reaction, the solvent was removed under reduced pressure, and the residue was purified by flash silica gel column chromatography (petroleum ether/EtOAc = 35/1) to afford the ring-opening product **60** (42.4 mg, 72%, major isomer/minor isomer = 2:1).

**1-Methyl-4-((2-phenylpent-2-en-1-yl)sulfonyl)benzene (60)**: white solid;  $^1\text{H NMR}$  (300 MHz,  $\text{CDCl}_3$ )  $\delta$  major isomer: 7.62-7.60 (m, 2H), 7.26-7.14 (m, 7H), 5.94 (t,  $J$  = 7.4 Hz, 1H), 4.34 (s, 2H), 2.35 (s, 3H), 2.12-2.02 (m, 2H), 0.96 (t,  $J$  = 7.5 Hz, 3H); minor isomer: 7.65-7.62 (m, 2H), 7.26-7.14 (m, 5H), 7.06-7.02 (m, 2H), 5.58 (t,  $J$  = 7.5 Hz, 1H), 4.10 (s, 2H), 2.39 (s, 3H), 2.02-1.94 (m, 2H), 0.86 (t,  $J$  = 7.5 Hz, 3H); **HRMS** (ESI) calculated for  $\text{C}_{18}\text{H}_{20}\text{NaO}_2\text{S}$   $[\text{M}+\text{Na}]^+$   $m/z$  323.1076, found 323.1071.

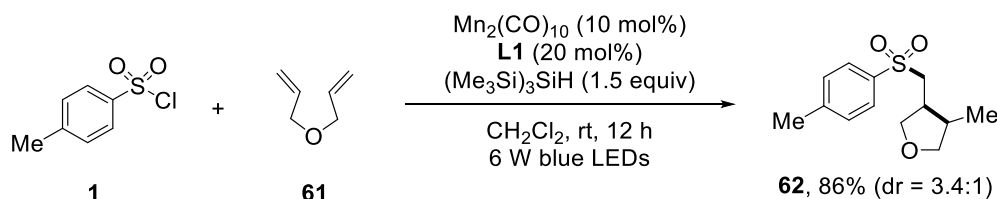

3-(Allyloxy)prop-1-ene (24  $\mu\text{L}$ , 0.2 mmol, 1.0 equiv), 4-methylbenzenesulfonyl chloride (57.4 mg, 0.3 mmol, 1.5 equiv),  $(\text{Me}_3\text{Si})_3\text{SiH}$  (93  $\mu\text{L}$ , 0.3 mmol, 1.5 equiv), 1,3-bis(diphenylphosphanyl)propane **L1** (16.5 mg, 0.04 mmol, 0.2 equiv), and  $\text{Mn}_2(\text{CO})_{10}$  (8.4 mg, 0.02 mmol, 0.1 equiv) were placed in a dry 10 mL Schlenk tube under a nitrogen atmosphere. Then anhydrous  $\text{CH}_2\text{Cl}_2$  (2.0 mL) was added with a syringe. The reaction mixture was stirred and irradiated by using 6 W blue LEDs at room temperature for 12 h. After completion of the reaction, the solvent was removed under reduced pressure, and the residue was purified by flash silica gel column chromatography (petroleum ether/EtOAc = 20/1) to afford the ring-opening product **62** (42.1 mg, 86%, dr = 3.4:1).

**3-Methyl-4-(tosylmethyl)tetrahydrofuran (62)**: yellow oil;  $^1\text{H NMR}$  (400 MHz,  $\text{CDCl}_3$ )  $\delta$  major isomer: 7.88-7.72 (m, 2H), 7.44-7.32 (m, 2H), 3.99-3.95 (m, 1H), 3.91-3.87 (m, 1H), 3.60-3.56 (m, 1H), 3.44-3.41 (m, 1H), 3.26-3.21 (m, 1H), 3.08-3.01 (m, 1H), 2.72-2.63 (m, 1H), 2.46 (s, 3H), 2.42-2.36 (m, 1H), 0.92 (d,  $J$  =

7.1 Hz, 3H);  $^{13}\text{C}$  NMR (75 MHz,  $\text{CDCl}_3$ )  $\delta$  major isomer: 144.9, 136.3, 130.0, 127.9, 74.5, 70.9, 55.3, 36.6, 35.9, 21.6, 13.3; HRMS (ESI) calculated for  $\text{C}_{13}\text{H}_{18}\text{NaO}_3\text{S}$   $[\text{M}+\text{H}]^+$   $m/z$  277.0869, found 277.0865.

### 3) Formation of $(\text{Me}_3\text{Si})_3\text{Si Cl}$ :

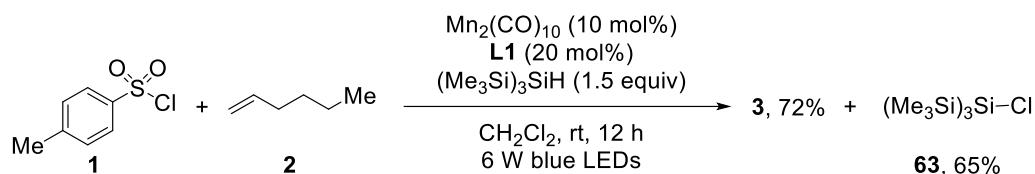

Hex-1-ene (25  $\mu\text{L}$ , 0.2 mmol, 1.0 equiv), 4-methylbenzenesulfonyl chloride (57.9 mg, 0.3 mmol, 1.5 equiv),  $(\text{Me}_3\text{Si})_3\text{SiH}$  (93  $\mu\text{L}$ , 0.3 mmol, 1.5 equiv), 1,3-bis(diphenylphosphanyl)propane **L1** (16.5 mg, 0.04 mmol, 0.2 equiv), and  $\text{Mn}_2(\text{CO})_{10}$  (7.9 mg, 0.02 mmol, 0.1 equiv) were placed in a dry 10 mL Schlenk tube under a nitrogen atmosphere. Then anhydrous  $\text{CH}_2\text{Cl}_2$  (2.0 mL) was added with a syringe. The reaction mixture was stirred and irradiated by using 6 W blue LEDs at room temperature for 12 h. After completion of the reaction, the solvent was removed under reduced pressure, and the residue was purified by flash silica gel column chromatography (petroleum ether/EtOAc = 50/1) to afford **63** as colourless oil (48.6 mg, 65%).  $^1\text{H}$  NMR (300 MHz,  $\text{CDCl}_3$ )  $\delta$  0.20 (s, 27H);  $^{13}\text{C}$  NMR (75 MHz,  $\text{CDCl}_3$ )  $\delta$  -0.60. MS (ESI)  $m/z$  283.2  $[\text{M}+\text{H}]^+$ . The spectroscopic data were in accordance with those reported in the literature.<sup>[12]</sup> This result is consistent with Cl-atom abstraction by the silyl radical.

### 4) Visible light on/off experiments:

Hex-1-ene (25  $\mu\text{L}$ , 0.2 mmol, 1.0 equiv), 4-methylbenzenesulfonyl chloride (58.1 mg, 0.3 mmol, 1.5 equiv),  $(\text{Me}_3\text{Si})_3\text{SiH}$  (93  $\mu\text{L}$ , 0.3 mmol, 1.5 equiv), 1,3-bis(diphenylphosphanyl)propane **L1** (16.8 mg, 0.04 mmol, 0.2 equiv), and  $\text{Mn}_2(\text{CO})_{10}$  (8.2 mg, 0.02 mmol, 0.1 equiv) were placed in a dry 10 mL Schlenk tube under a nitrogen atmosphere. Then anhydrous  $\text{CH}_2\text{Cl}_2$  (2.0 mL) was added with a syringe. The reaction mixture was stirred and irradiated by using 6 W blue LEDs at room temperature for 12 h. The process of photocatalytic reaction with and without light was monitored by  $^1\text{H}$  NMR using 1,3,5-trimethoxybenzene as internal standard. The results suggest that the formation of product **3** requires continuous visible light irradiation.



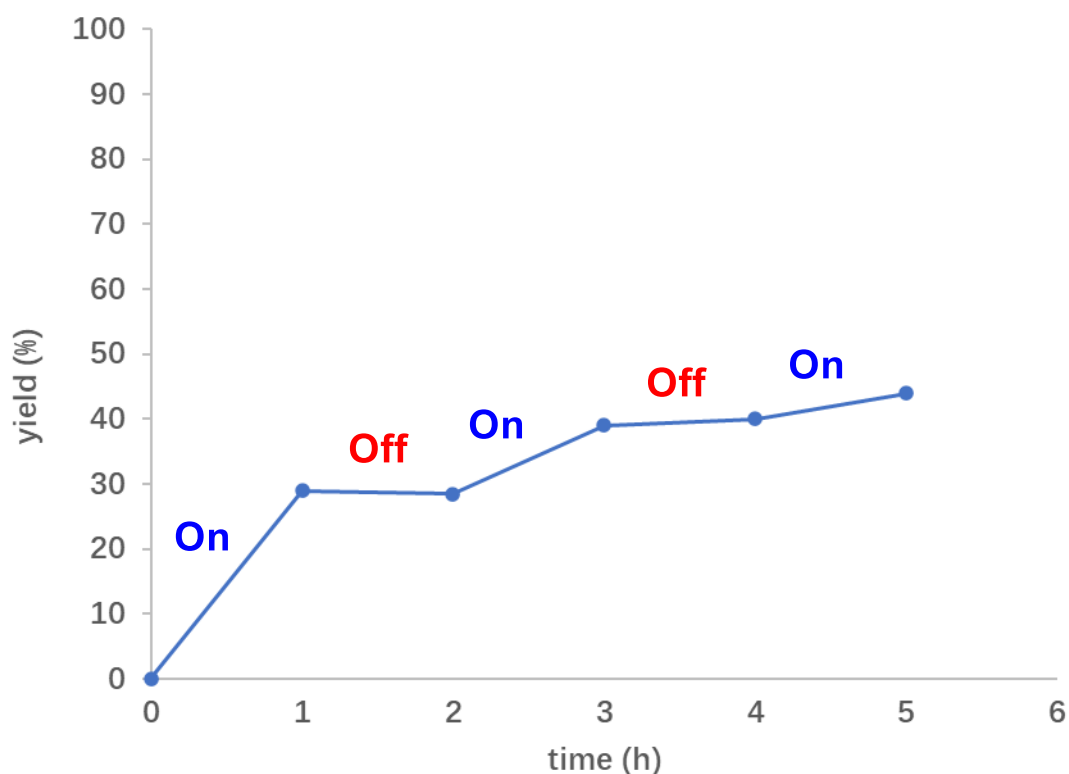

### 5) *The time profile of model reaction with and without ligand L1:*

Hex-1-ene (25  $\mu$ L, 0.2 mmol, 1.0 equiv), 4-methylbenzenesulfonyl chloride (57.7 mg, 0.3 mmol, 1.5 equiv),  $(\text{Me}_3\text{Si})_3\text{SiH}$  (93  $\mu$ L, 0.3 mmol, 1.5 equiv), 1,3-bis(diphenylphosphanyl)propane **L1** (16.7 mg, 0.04 mmol, 0.2 equiv), and  $\text{Mn}_2(\text{CO})_{10}$  (8.2 mg, 0.02 mmol, 0.1 equiv) were placed in a dry 10 mL Schlenk tube under a nitrogen atmosphere. Then anhydrous  $\text{CH}_2\text{Cl}_2$  (2.0 mL) was added with a syringe. The reaction mixture was stirred and irradiated by using 6 W blue LEDs at room temperature for 12 h. In addition, the same reaction was conducted again, but without **L1**. The processes of these two reactions were monitored by  $^1\text{H}$  NMR using 1,3,5-trimethoxybenzene as internal standard. The time profile of model reaction indicates that the inclusion of **L1** helps in accelerating this radical transformation.

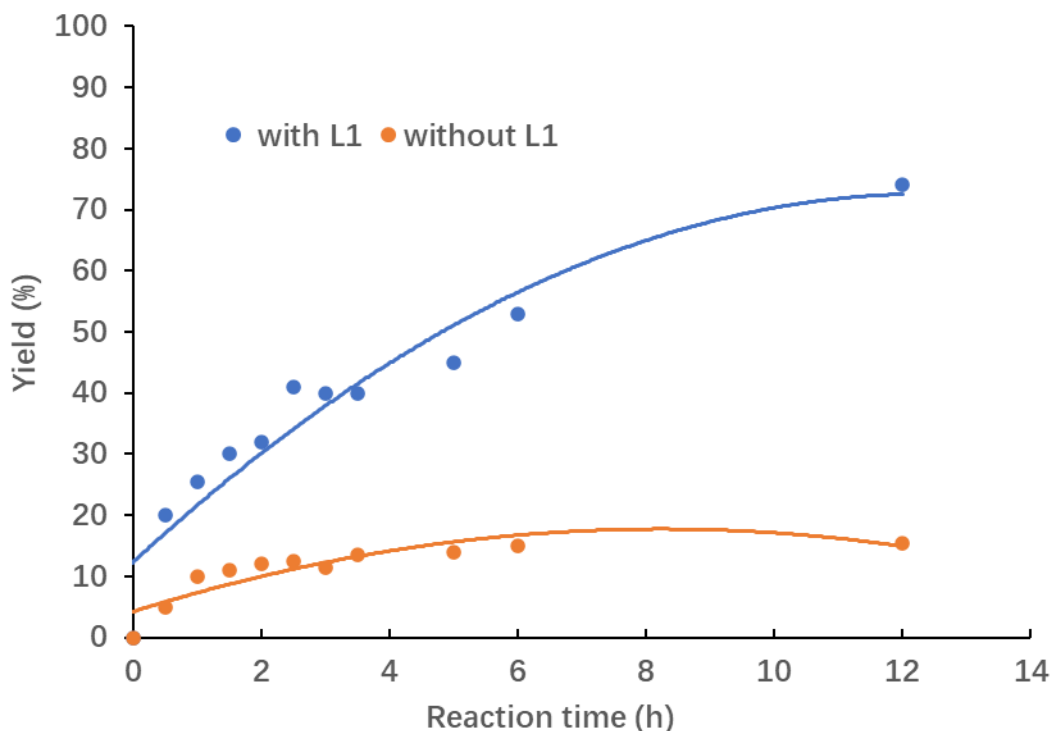

### 6) UV-vis spectroscopic measurements:

The UV-vis experiments were performed on an Agilent Cary 100 UV-visible spectrophotometer with a quartz cuvette (10 mm path length). The reaction mixture of  $\text{Mn}_2(\text{CO})_{10}$  and **L1** was stirred in hexafluorobenzene and irradiated by using 6 W blue LEDs at room temperature for 12 h. After completion of the reaction, the mixture was filtered to give the crude  $(\text{L1})_2\text{Mn}_2(\text{CO})_6$ .  $(\text{L1})_2\text{Mn}_2(\text{CO})_6$  was measured in DCM with 800  $\mu\text{M}$  concentration.  $\text{Mn}_2(\text{CO})_6$  and **L1** are measured in DCM with 80  $\mu\text{M}$  concentration. The full spectras were collected, and we observed that the optical absorption spectrum of in situ formed  $(\text{L1})_2\text{Mn}_2(\text{CO})_6$  generated a bathochromic shift compared to the spectra of  $\text{Mn}_2(\text{CO})_{10}$ , which indicated that the  $(\text{L1})_2\text{Mn}_2(\text{CO})_6$  complex could be an effective complex for the generation of manganese radicals under blue LEDs irradiation ( $\lambda$  ranging from 420 to 500 nm,  $\lambda_{\text{max}} = 450$  nm).

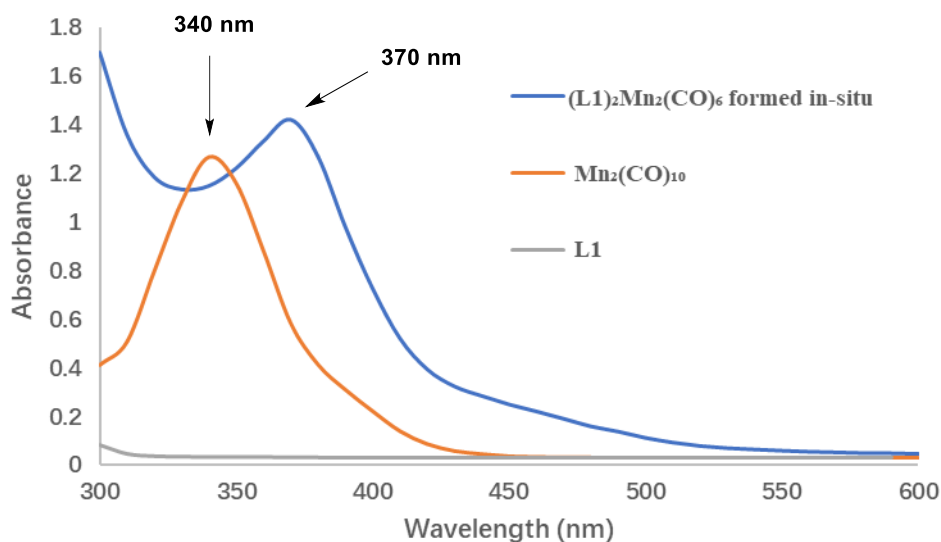

### 7) HRMS analysis of reaction mixture of $Mn_2(CO)_{10}$ and L1:

We performed high-resolution mass spectrometry (HRMS) analysis. The reaction mixture of  $Mn_2(CO)_{10}$  and L1 in  $CH_2Cl_2$  was irradiated with 6 W blue LEDs at room temperature under  $N_2$  for 1 h. When the mixture was subjected to HRMS analysis, the mass of  $[L1Mn(CO)_3]^+$  could be detected, since the  $L1Mn(CO)_3$  readily loses one electron during the HRMS analysis. This result supports the existence of  $L1Mn(CO)_3$ .

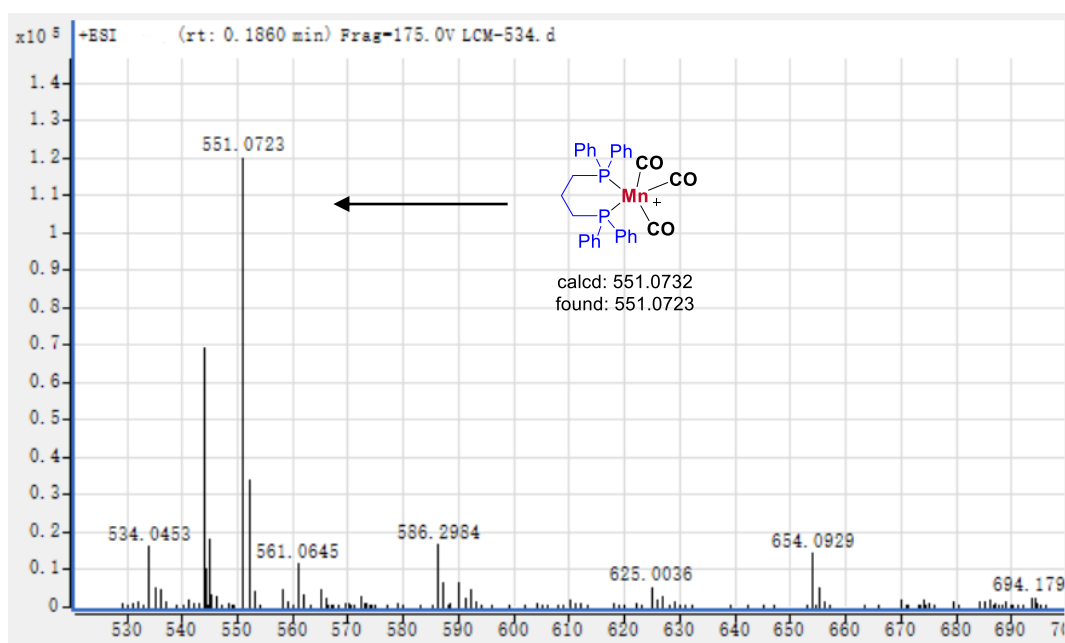

## 8) Infrared spectroscopic measurements:

The infrared spectra were measured on a Shimadzu IRAffinity-15 spectrometer. The reaction mixture of  $\text{Mn}_2(\text{CO})_{10}$  and **L1** was stirred in hexafluorobenzene and irradiated by using 6 W blue LEDs at room temperature for 12 h. After completion of the reaction, the mixture was filtered to give the crude  $(\text{L1})_2\text{Mn}_2(\text{CO})_6$ . The infrared spectra of  $(\text{L1})_2\text{Mn}_2(\text{CO})_6$  generated a new infrared vibrational band at the  $1891\text{ cm}^{-1}$  compared to that of  $\text{Mn}_2(\text{CO})_{10} + \text{L1}$  (in the dark), which might be attributed to the CO stretching mode of  $(\text{L1})_2\text{Mn}_2(\text{CO})_6$ . Moreover, a new infrared vibrational band appeared at the  $1529\text{ cm}^{-1}$  compared to that of **L1** or  $\text{Mn}_2(\text{CO})_{10} + \text{L1}$  (in the dark), which might be attributed to the aromatic C-C stretching mode of **L1** in  $(\text{L1})_2\text{Mn}_2(\text{CO})_6$ .

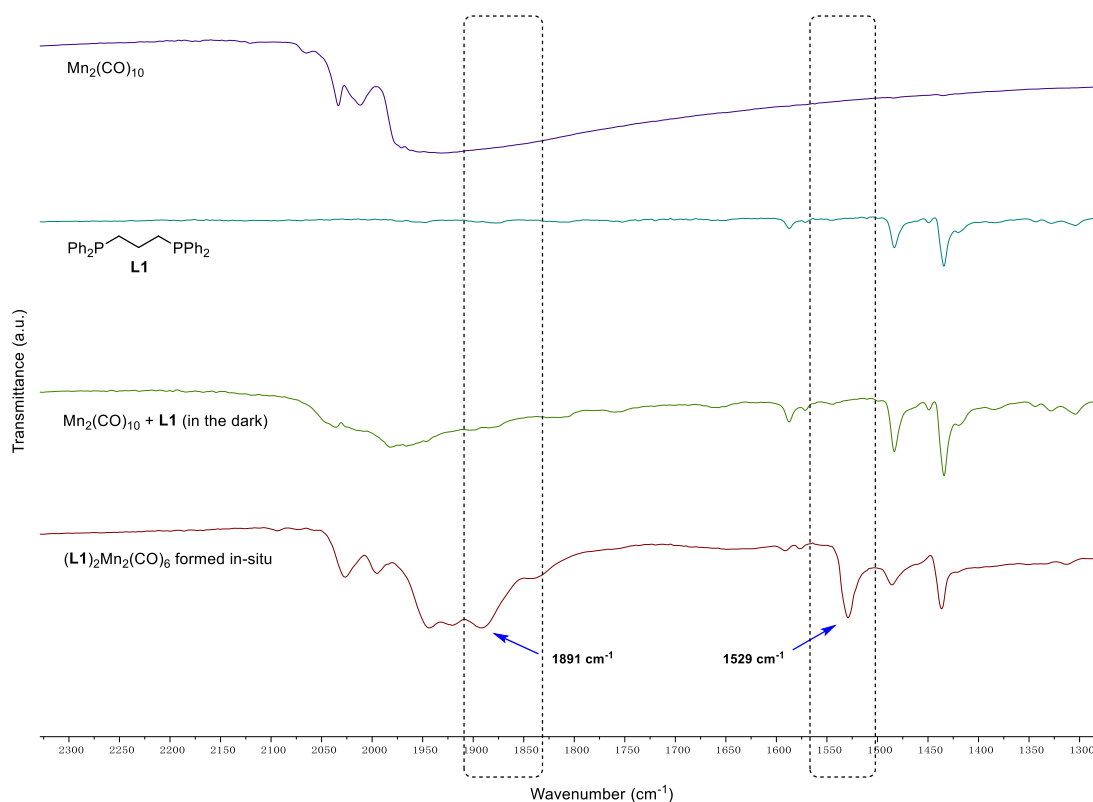

**9) The emission spectra for the light source:**

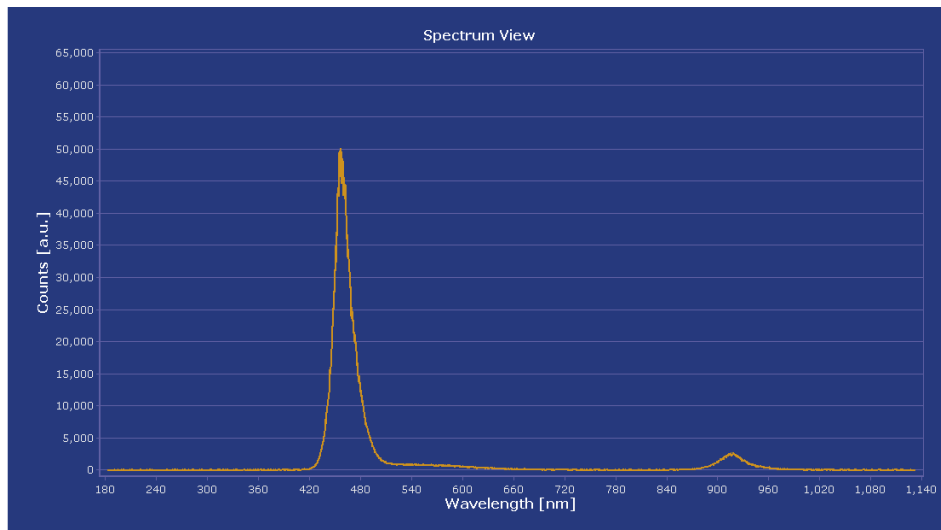

The emission spectra for 6 W blue LEDs

## References:

- [1] B. T. V. Srinivas, V. S. Rawat, K. Konda, B. Sreedhar, *Adv. Synth. Catal.* **2014**, 356, 805.
- [2] T. Miura, D. Moriyama, S. Miyakawa, M. Murakami, *Chem. Lett.* **2020**, 49, 1382.
- [3] F. Wang, W. Rao, S.-Y. Wang, *J. Org. Chem.* **2021**, 86, 8970.
- [4] X.-S. Zhou, Y. Cheng, J. Chen, X.-Y. Yu, W.-J. Xiao, J.-R. Chen, *ChemCatChem* **2019**, 11, 5300.
- [5] G-P. Lu, C. Cai, F. Chen, R.-L. Ye, B.-J. Zhou, *ACS Sustainable Chem. Eng.* **2016**, 4, 1804.
- [6] W. Liu, H. Li, H. Qin, W. Zhao, C. Zhou, S. Jiang, C. Yang, *Chem. Res. Chin. Univ.* **2017**, 33, 213.
- [7] J. He, G. Chen, B. Zhang, Y. Li, J.-R. Chen, W.-J. Xiao, F. Liu, C. Li, *Chem* **2020**, 6, 1149.
- [8] D. Li, T.-K. Ma, R. J. Scott, J. D. Wilden, *Chem. Sci.* **2020**, 11, 5333.
- [9] Y. Fu, Q.-S. Xu, Q.-Z. Li, Z. Du, K.-H. Wang, D. Huang, Y. Hu, *Org. Biomol. Chem.* **2017**, 15, 2841.
- [10] S. Chen, Y. Li, M. Wang, X. Jiang, *Green Chem.* **2020**, 22, 322.
- [11] S. Luo, M. Peng, P. Querard, C.-C. Li, C.-J. Li, *J. Org. Chem.* **2021**, 86, 13111.
- [12] S. M. Hell, C. F. Meyer, A. Misale, J. B. I. Sap, K. E. Christensen, M. C. Willis, A. A. Trabanco, V. Gouverneur, *Angew. Chem. Int. Ed.* **2020**, 59, 11620.
- [13] P. Das, S. Das, K. Varalaxmi, R. Jana, *Adv. Synth. Catal.* **2021**, 363, 575.

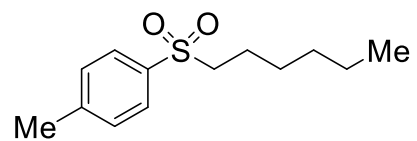

3

$^1\text{H NMR}$  (400 MHz,  $\text{CDCl}_3$ )

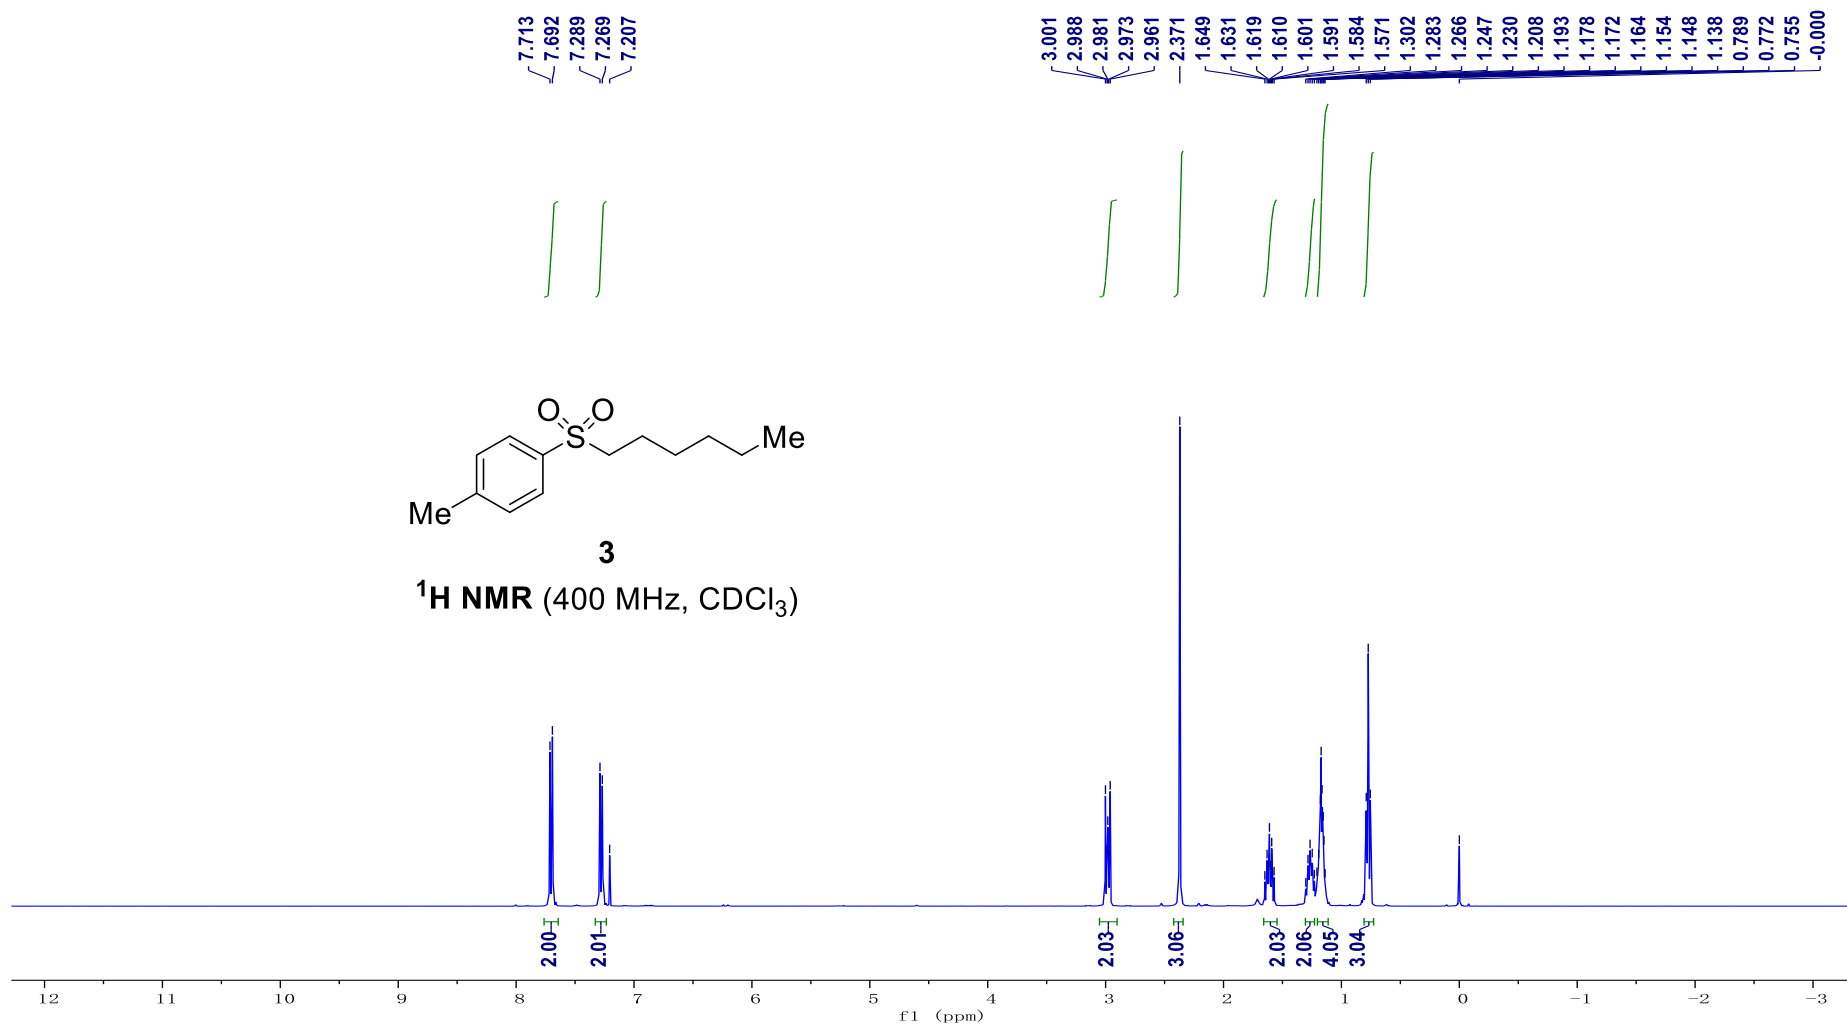

— 144.448

— 136.172

— 129.759

— 127.957

77.318

77.000

76.682

— 56.306

— 31.063

— 27.832

22.581

22.174

21.508

— 13.800

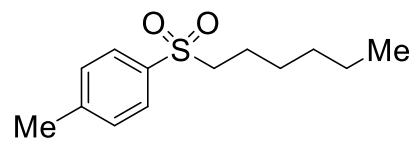

**3**

**<sup>13</sup>C NMR (100 MHz, CDCl<sub>3</sub>)**

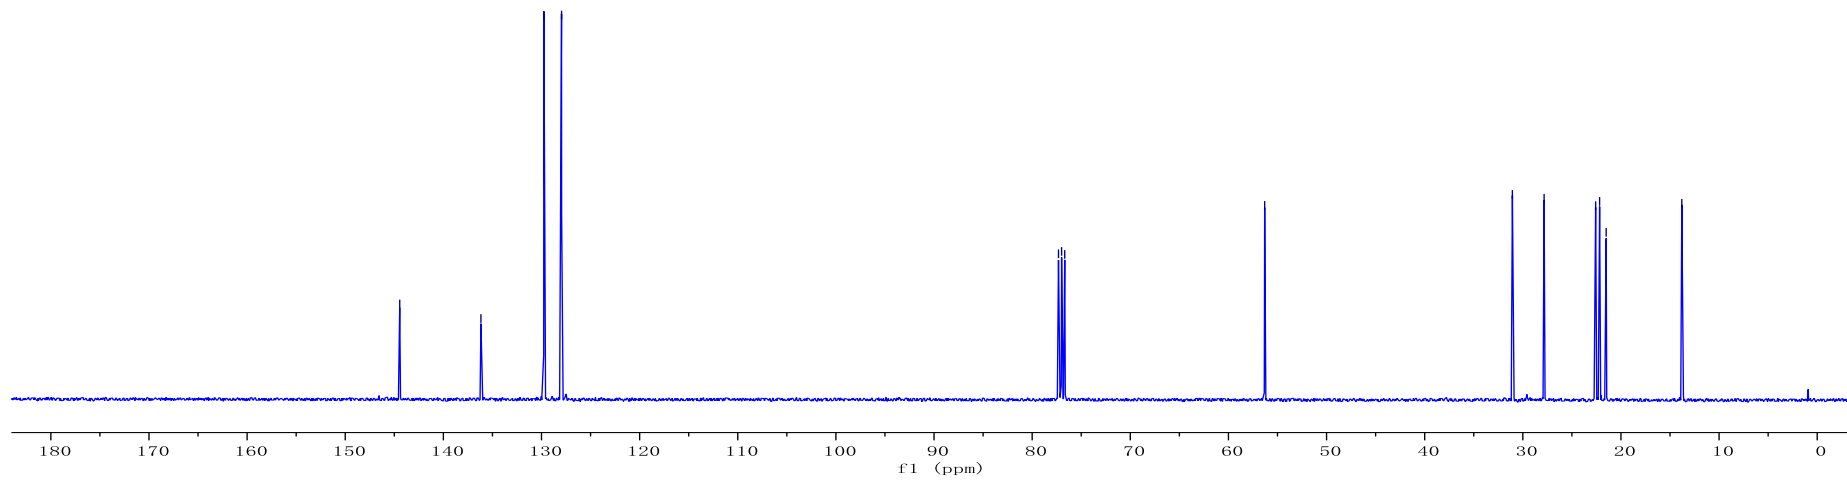



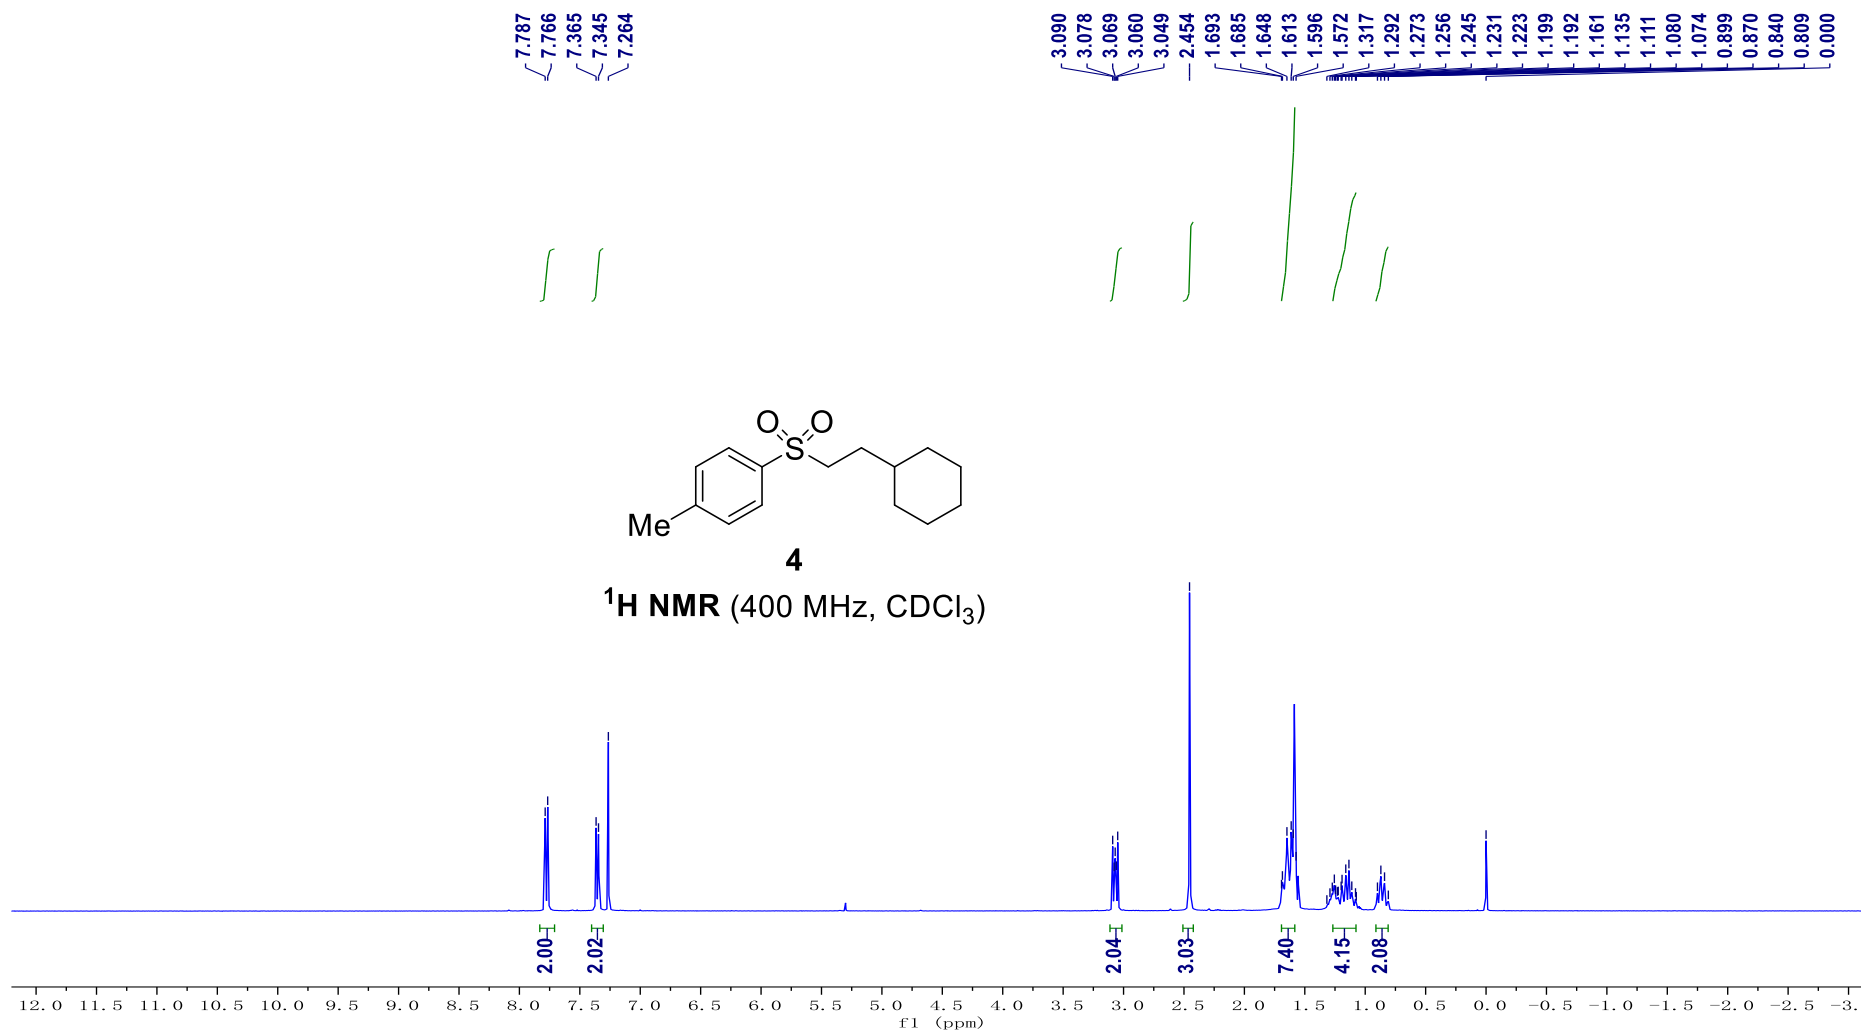

— 144.492  
— 136.234  
— 129.826  
— 128.039

77.424  
77.000  
76.577

— 54.443

36.620  
32.751  
29.684  
26.232  
25.972  
21.613

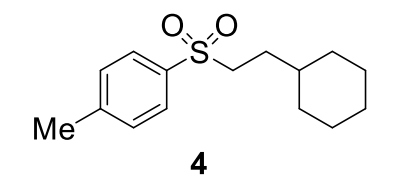

**<sup>13</sup>C NMR (75 MHz, CDCl<sub>3</sub>)**

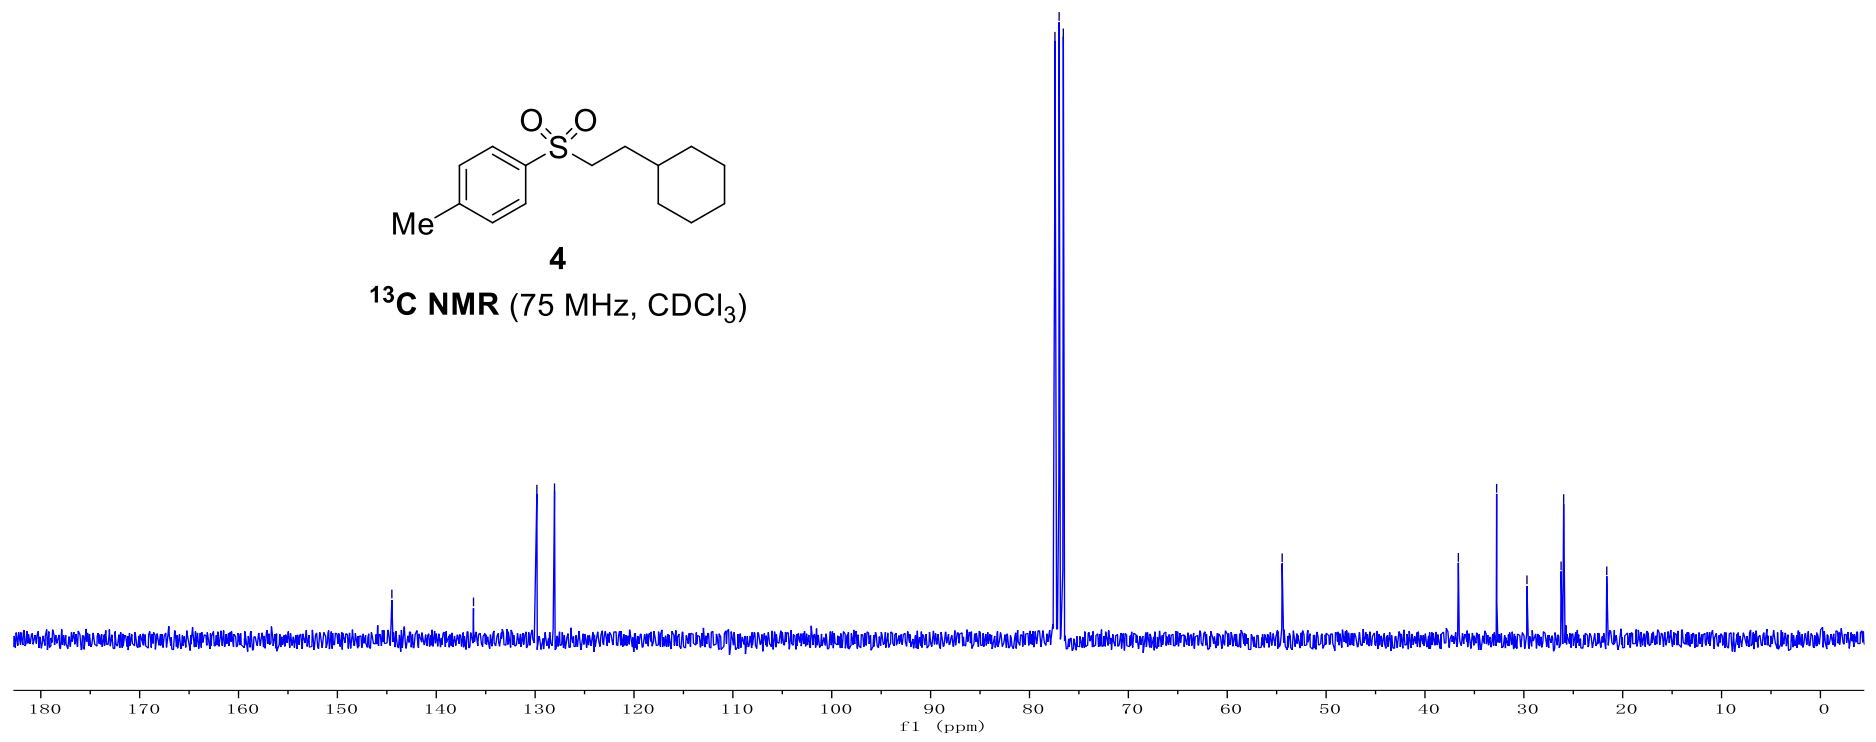

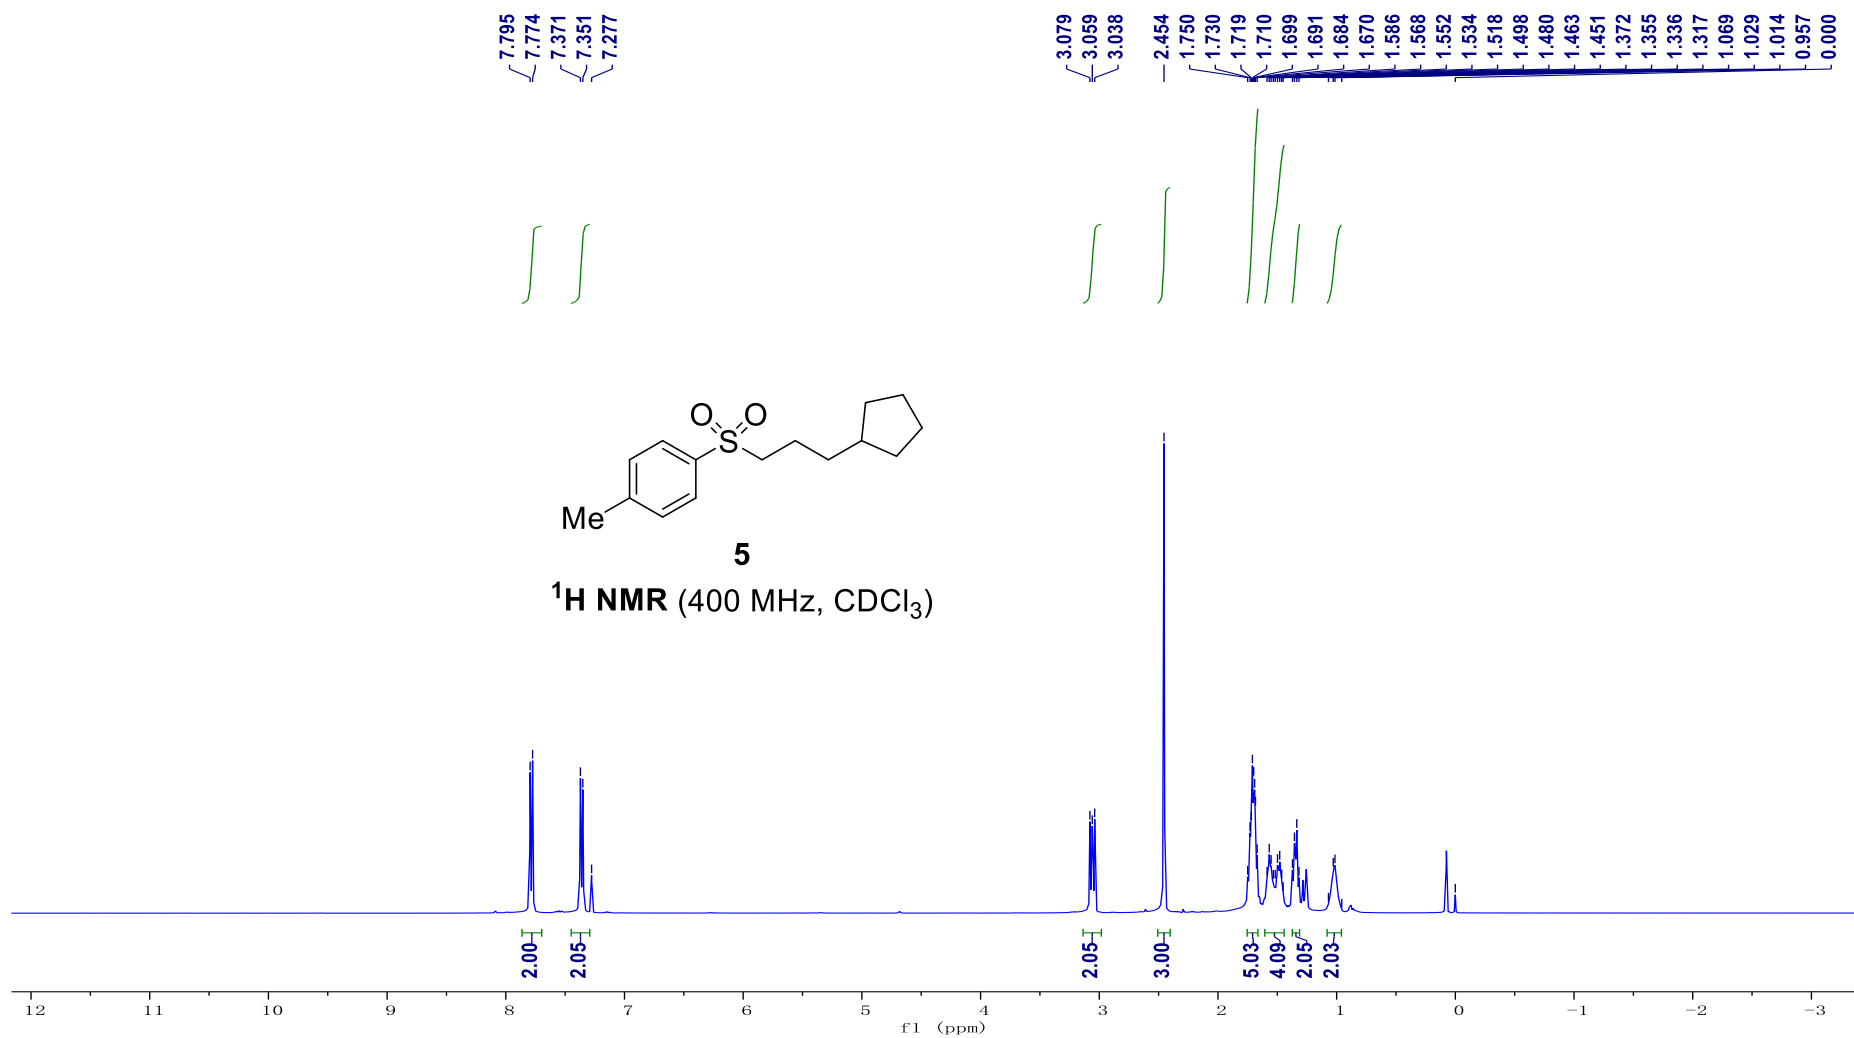

— 144.509

— 136.201

— 129.819

— 128.020

— 77.423

— 77.000

— 76.576

— 56.553

— 39.577

— 34.612

— 32.417

— 25.021

— 21.910

— 21.598

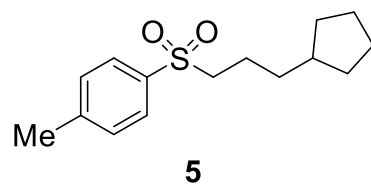

**<sup>13</sup>C NMR (75 MHz, CDCl<sub>3</sub>)**

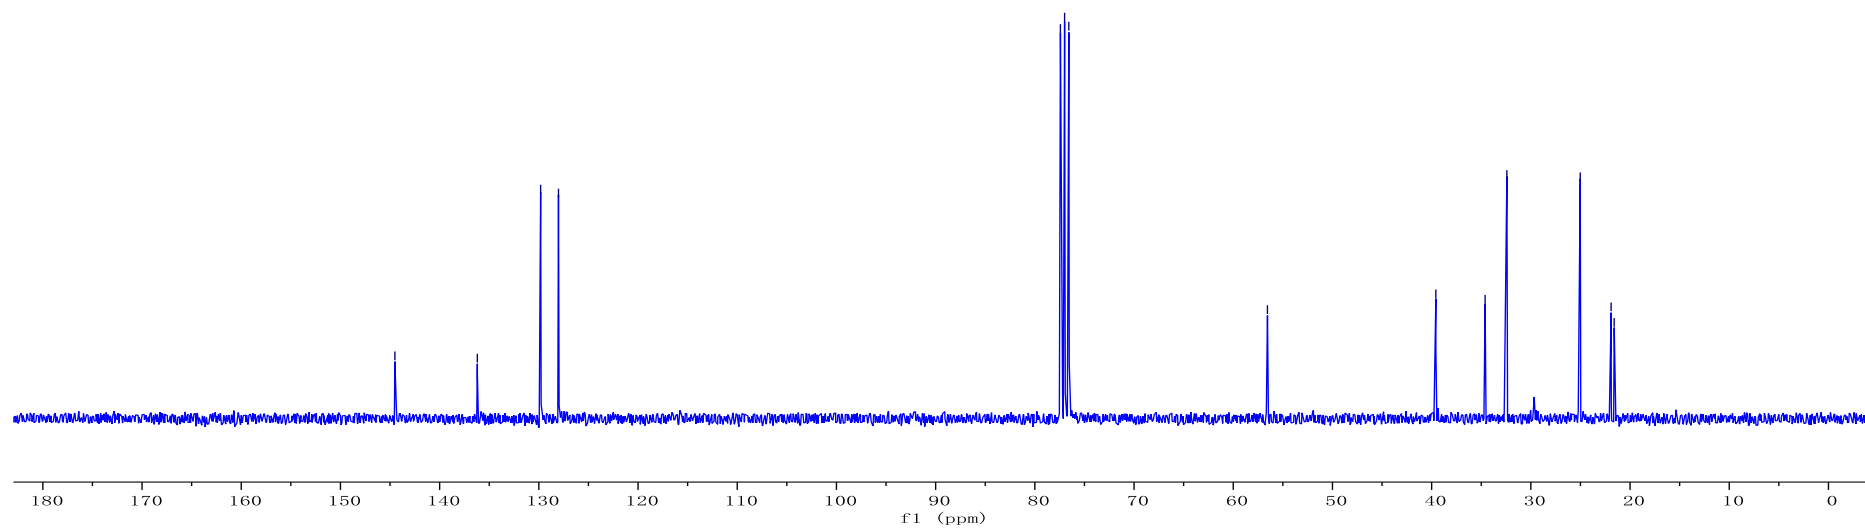

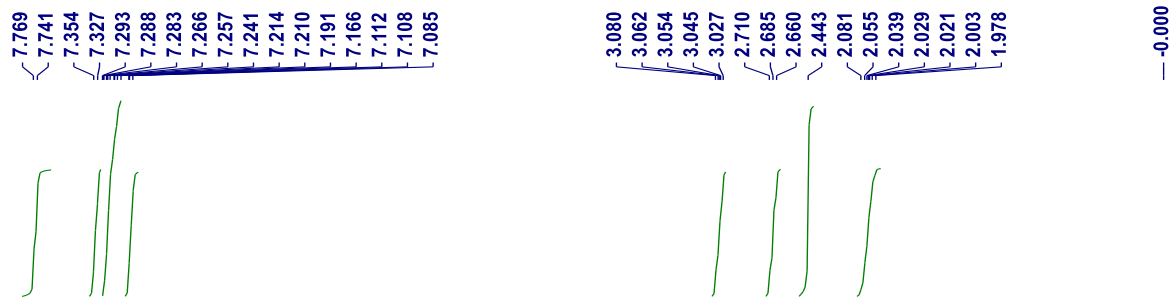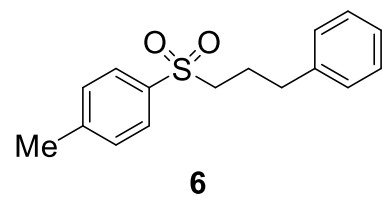

<sup>1</sup>H NMR (300 MHz, CDCl<sub>3</sub>)

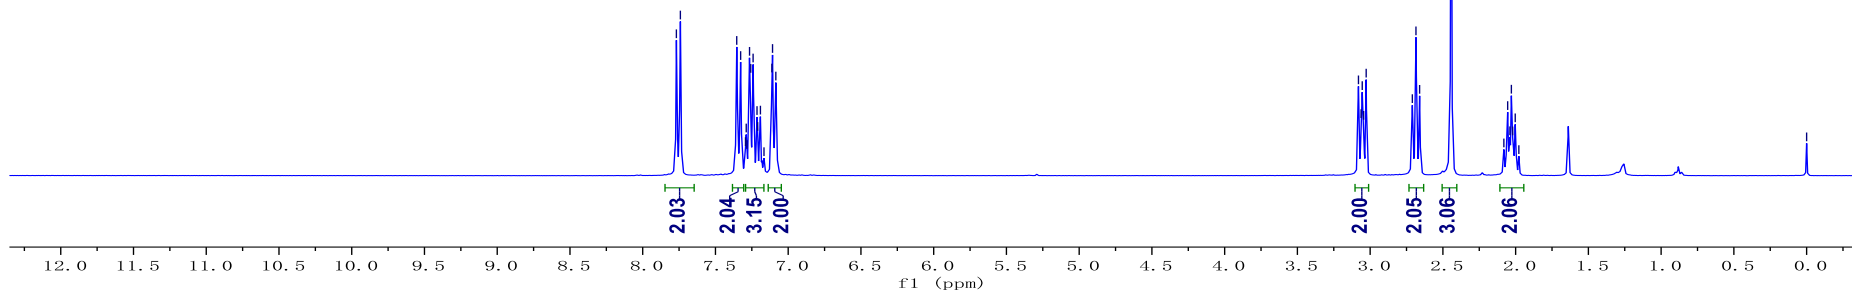

144.587  
139.868  
136.075  
129.843  
128.525  
128.320  
128.000  
126.337

77.424  
77.000  
76.576

55.483

34.043

24.213  
21.567

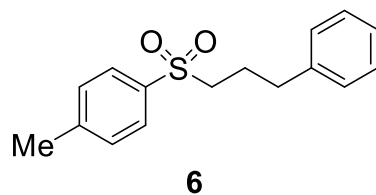

<sup>13</sup>C NMR (75 MHz, CDCl<sub>3</sub>)

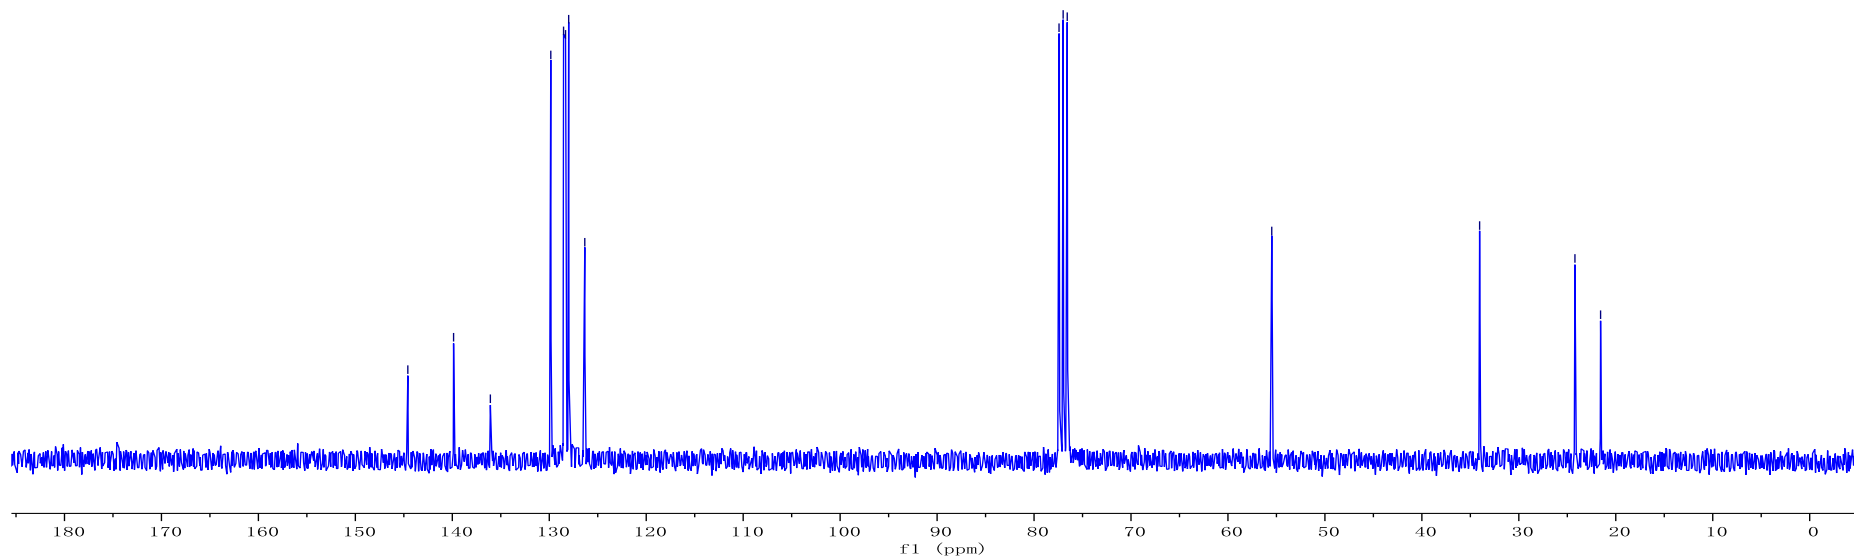

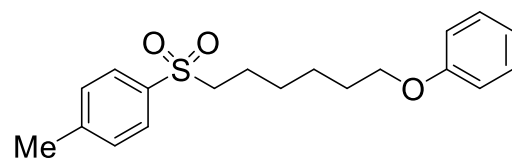

7

<sup>1</sup>H NMR (300 MHz, CDCl<sub>3</sub>)

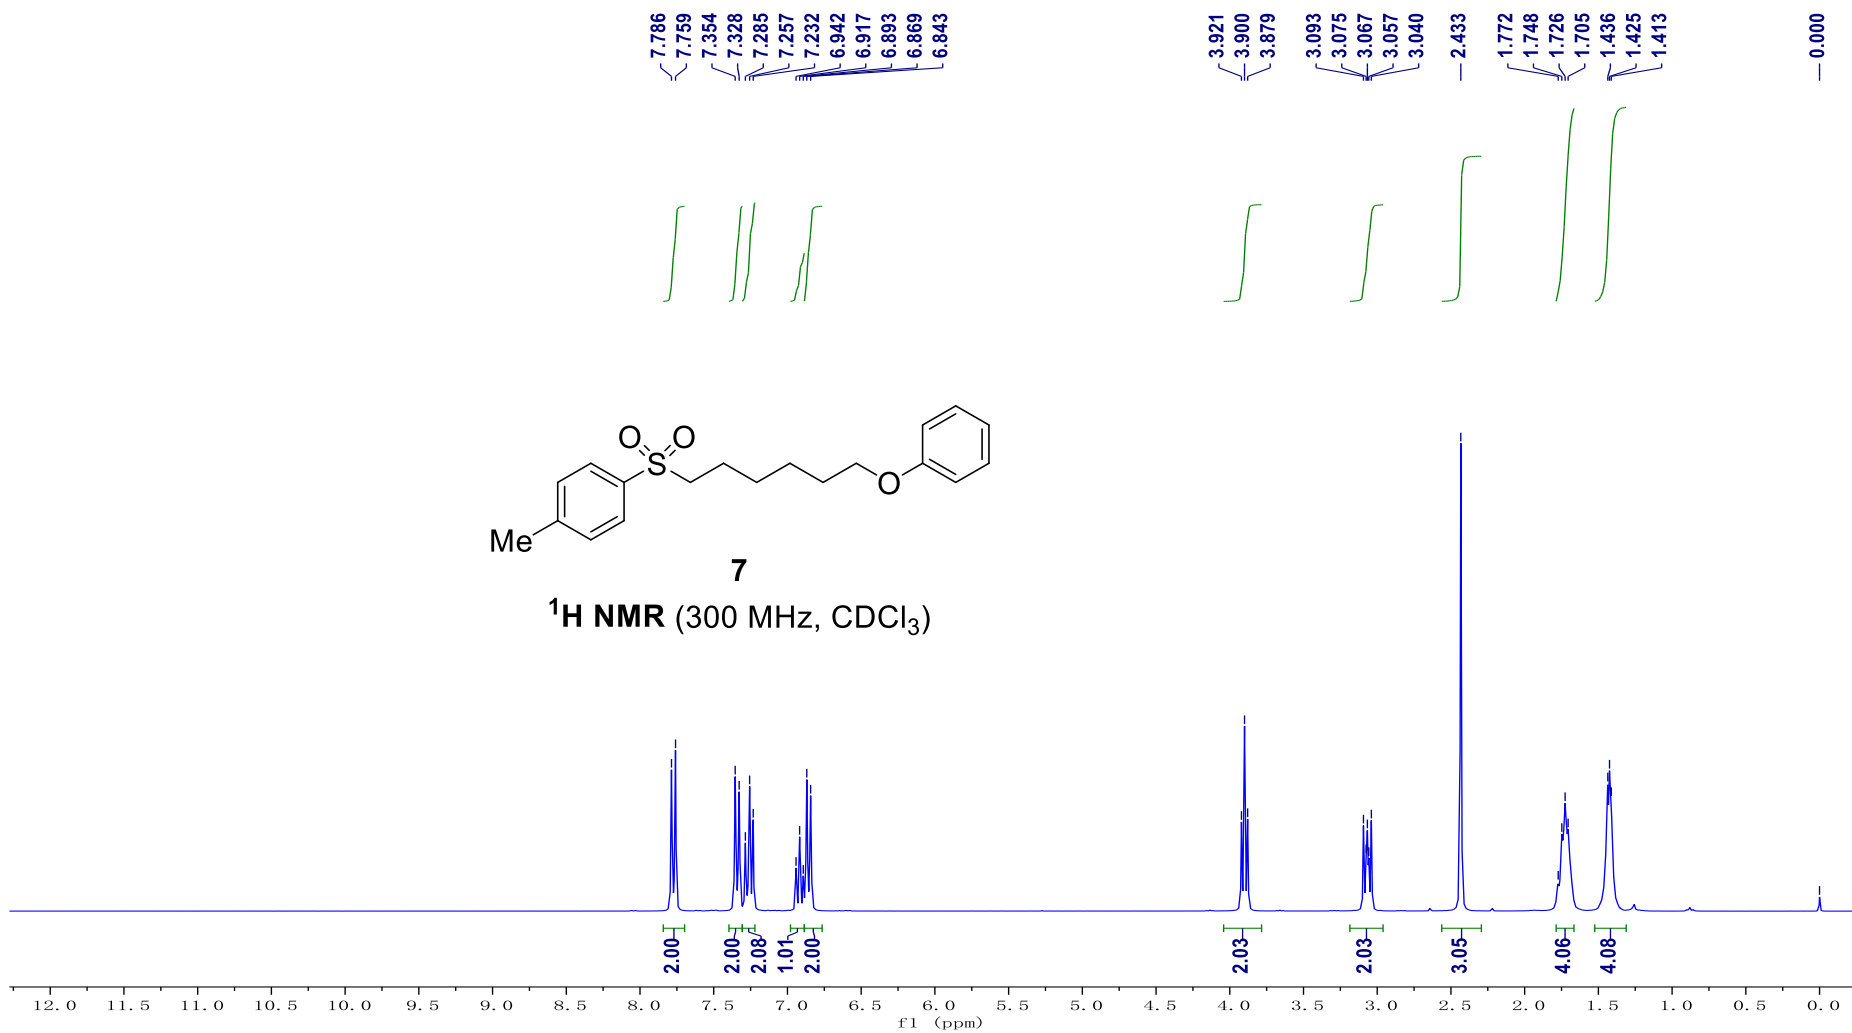

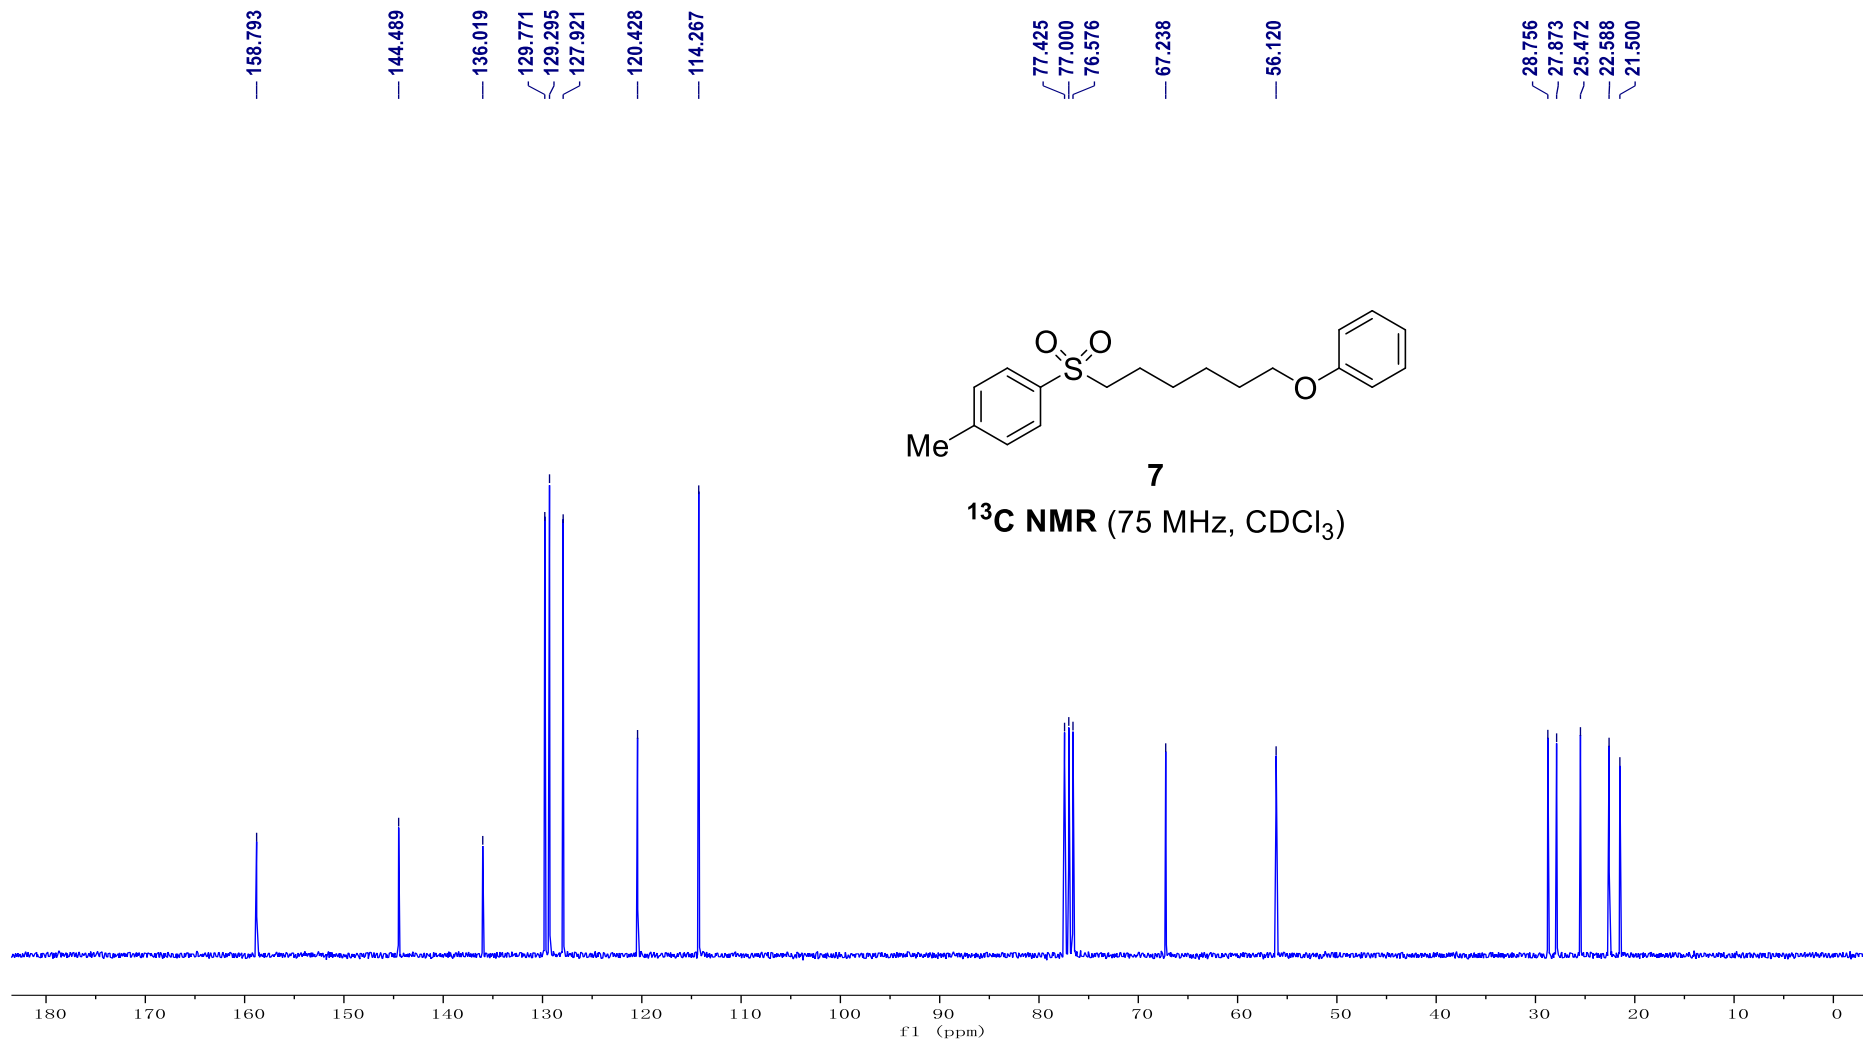



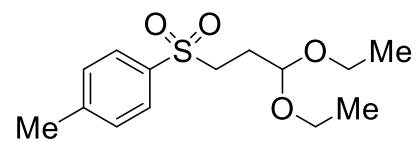

**8**

**<sup>1</sup>H NMR (300 MHz, CDCl<sub>3</sub>)**

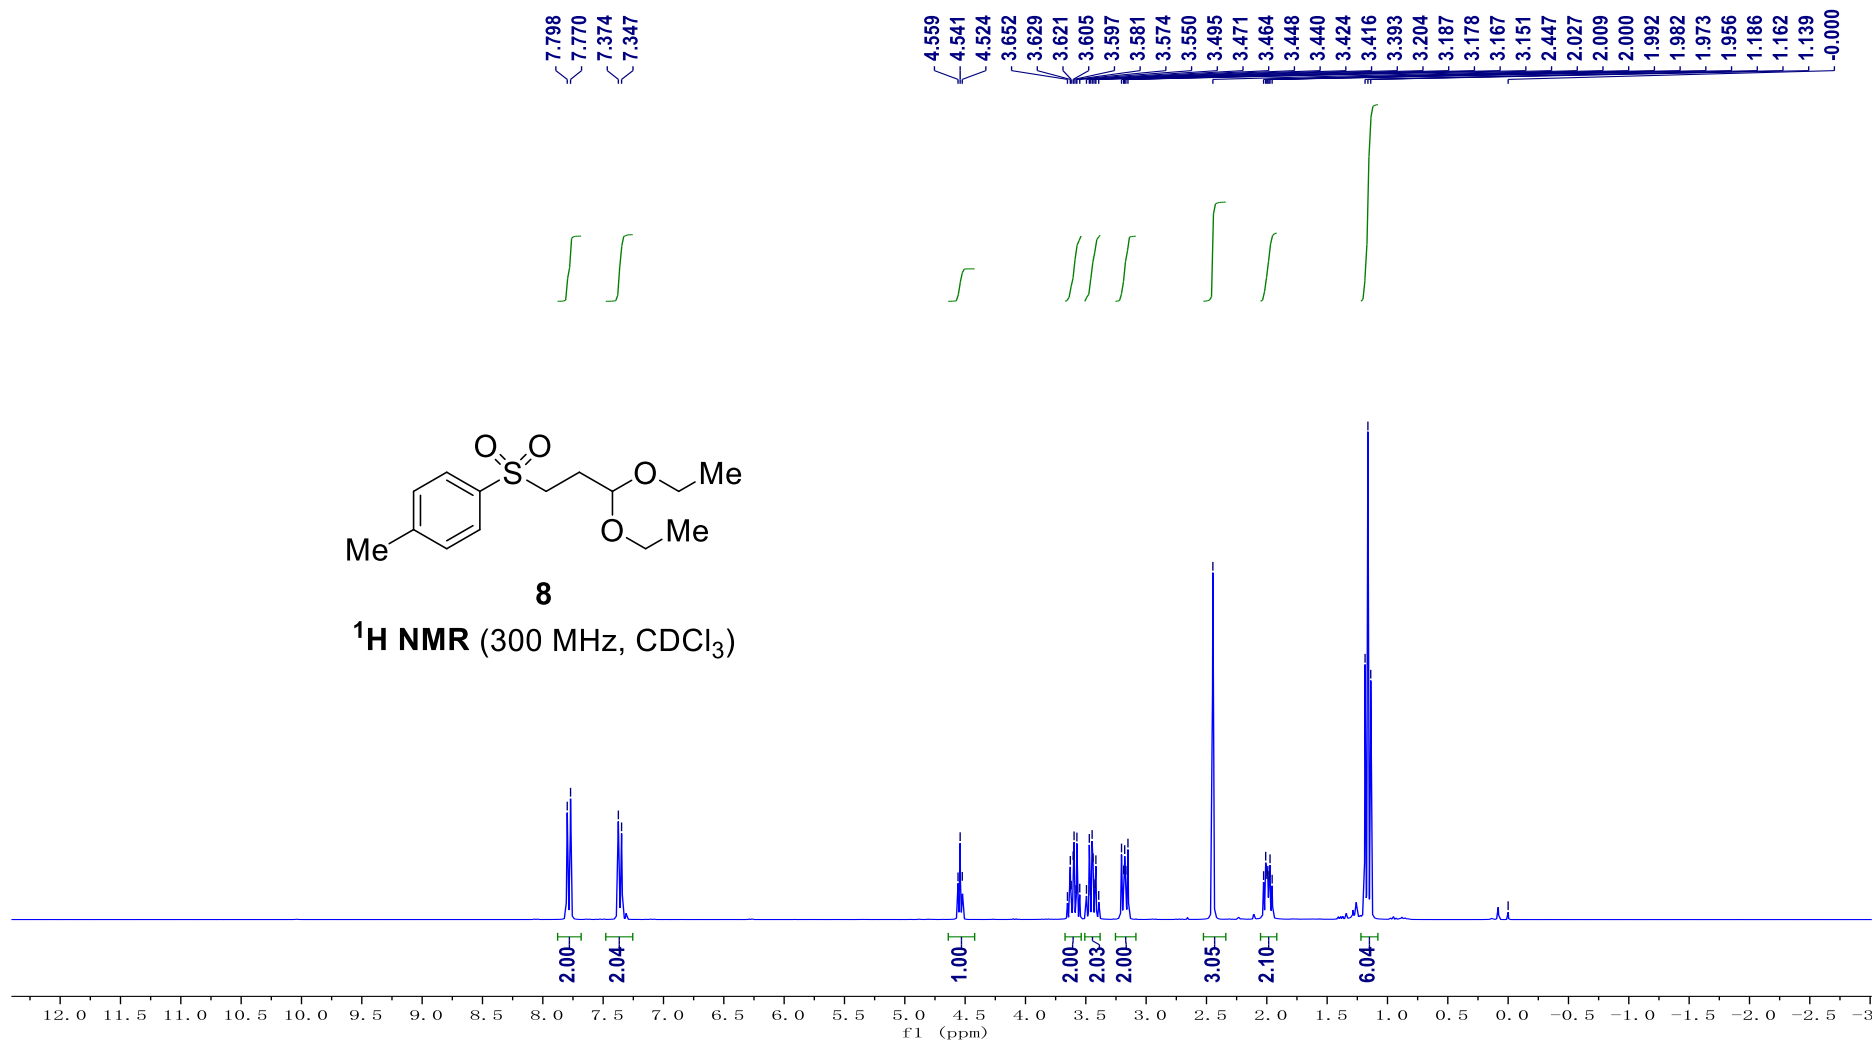

— 144.483  
— 135.786  
— 129.695  
— 127.796  
  
— 100.462  
  
— 77.426  
— 77.000  
— 76.575  
  
— 61.841  
  
— 51.576  
  
— 27.089  
— 21.366  
— 14.974

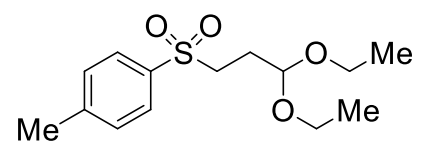

8

<sup>13</sup>C NMR (75 MHz, CDCl<sub>3</sub>)

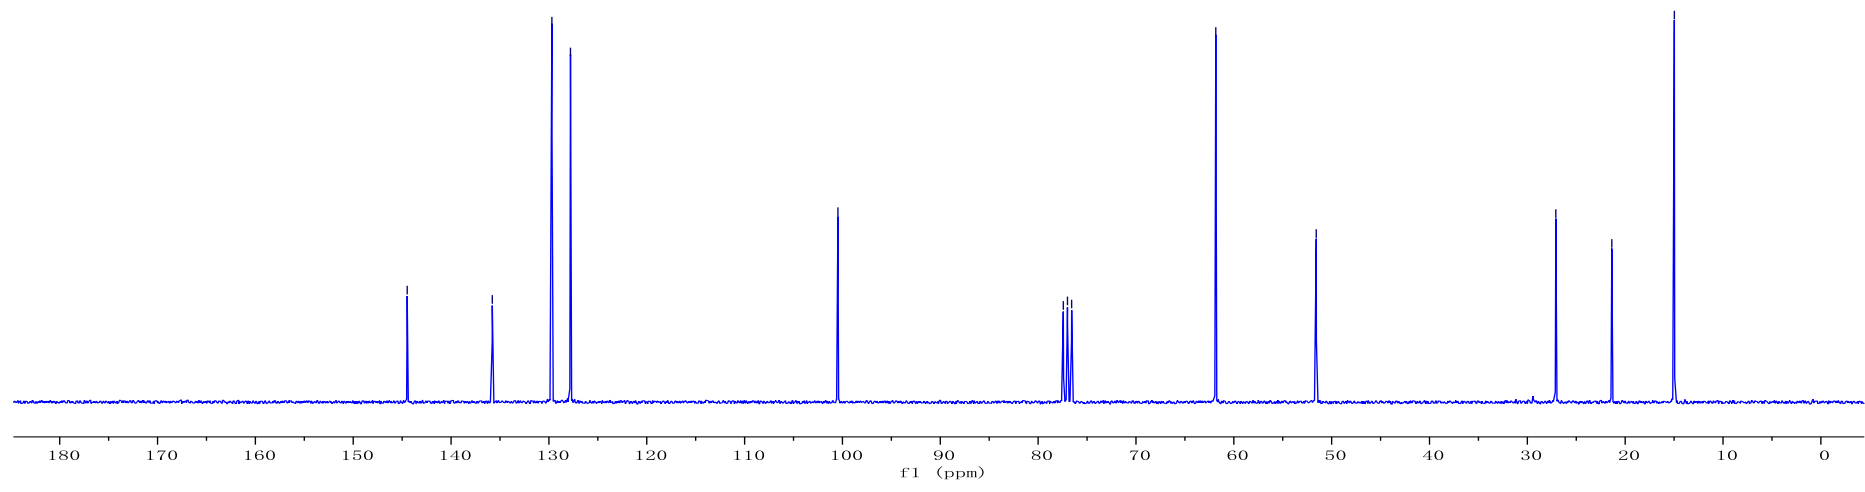

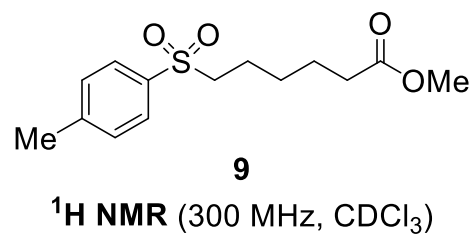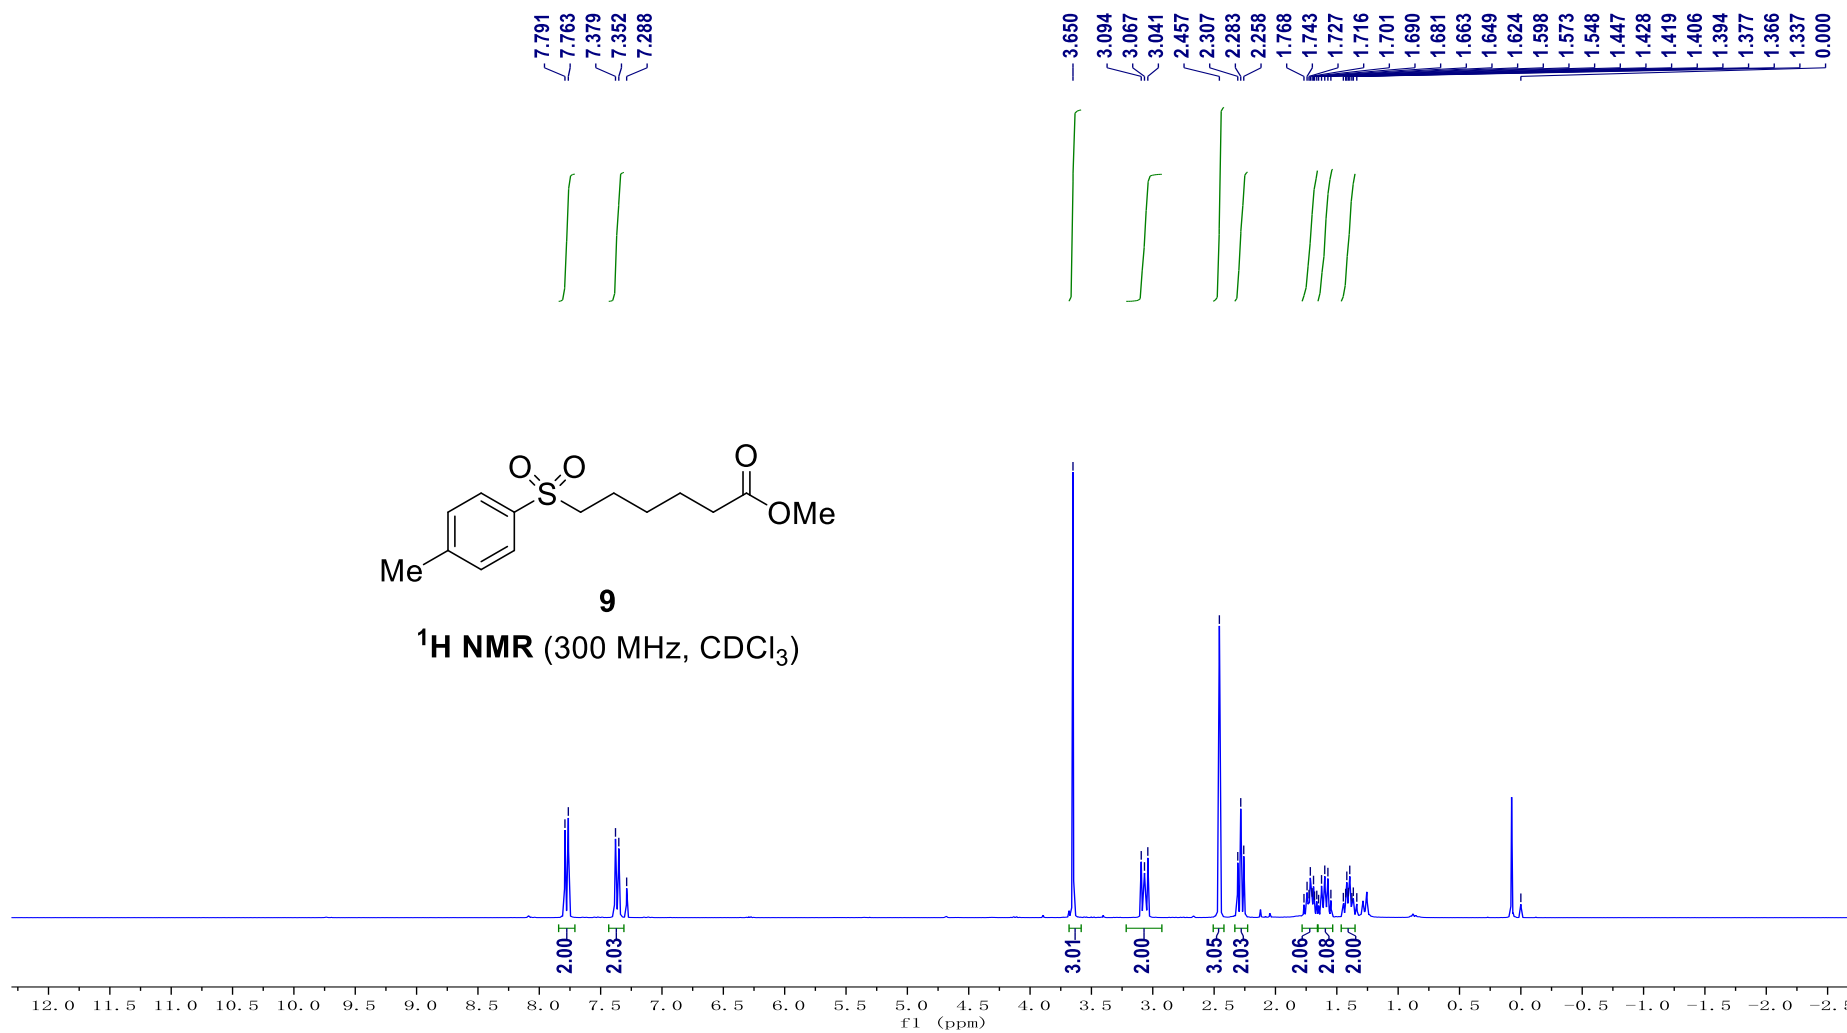

— 173.639

— 144.588

— 135.979

— 129.822

— 127.965

77.424

77.000

76.576

— 56.006

— 51.481

— 33.438

27.622

24.183

22.409

21.543

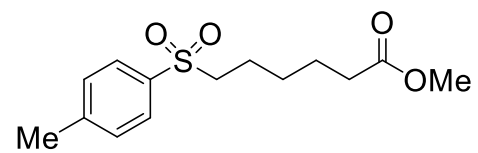

**9**

<sup>13</sup>C NMR (75 MHz, CDCl<sub>3</sub>)

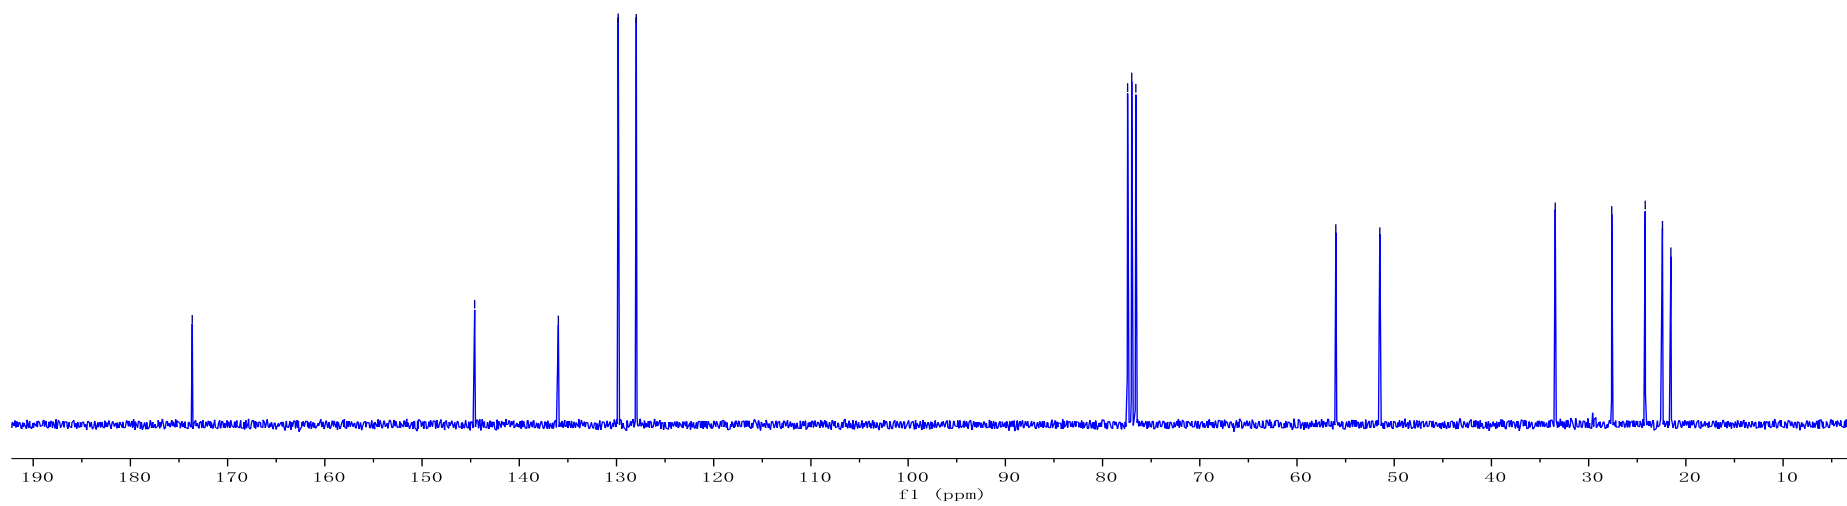

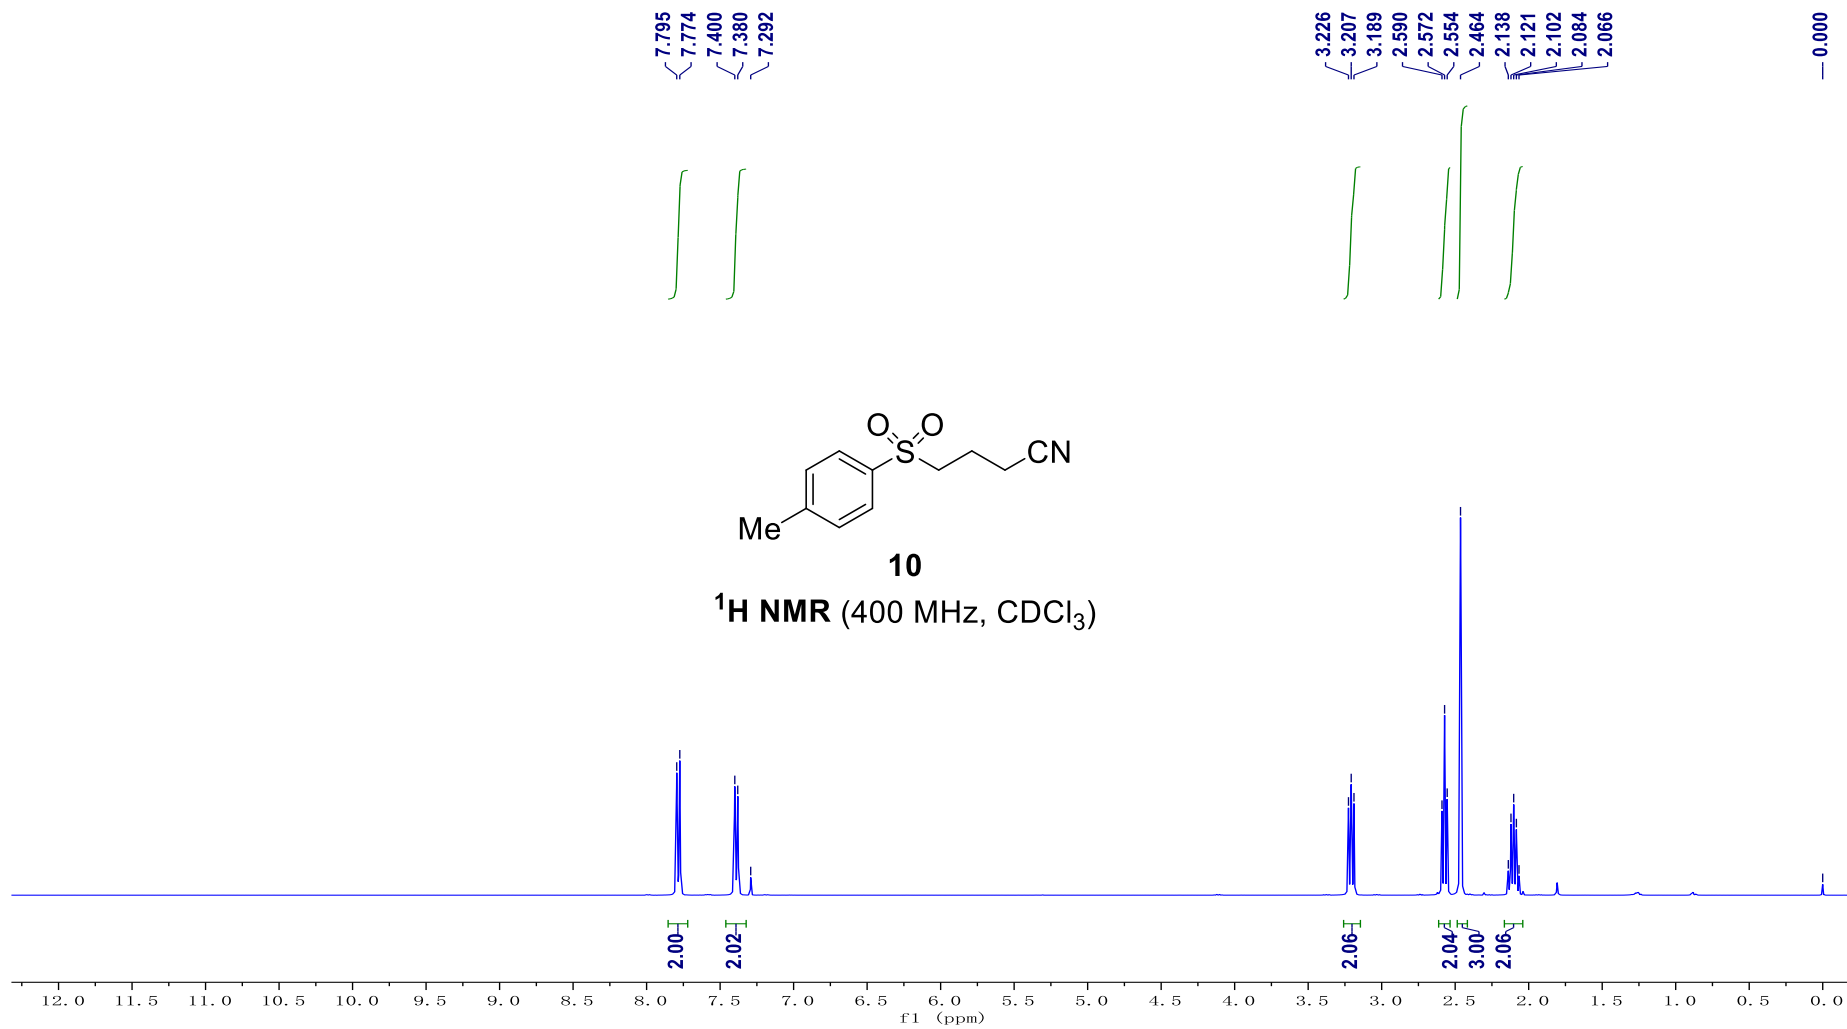

— 145.050

— 135.217

— 129.908

— 127.700

— 118.144

77.426

77.000

76.574

— 54.022

— 21.378

— 18.942

— 15.779

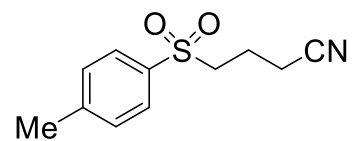

**10**

**<sup>13</sup>C NMR (75 MHz, CDCl<sub>3</sub>)**

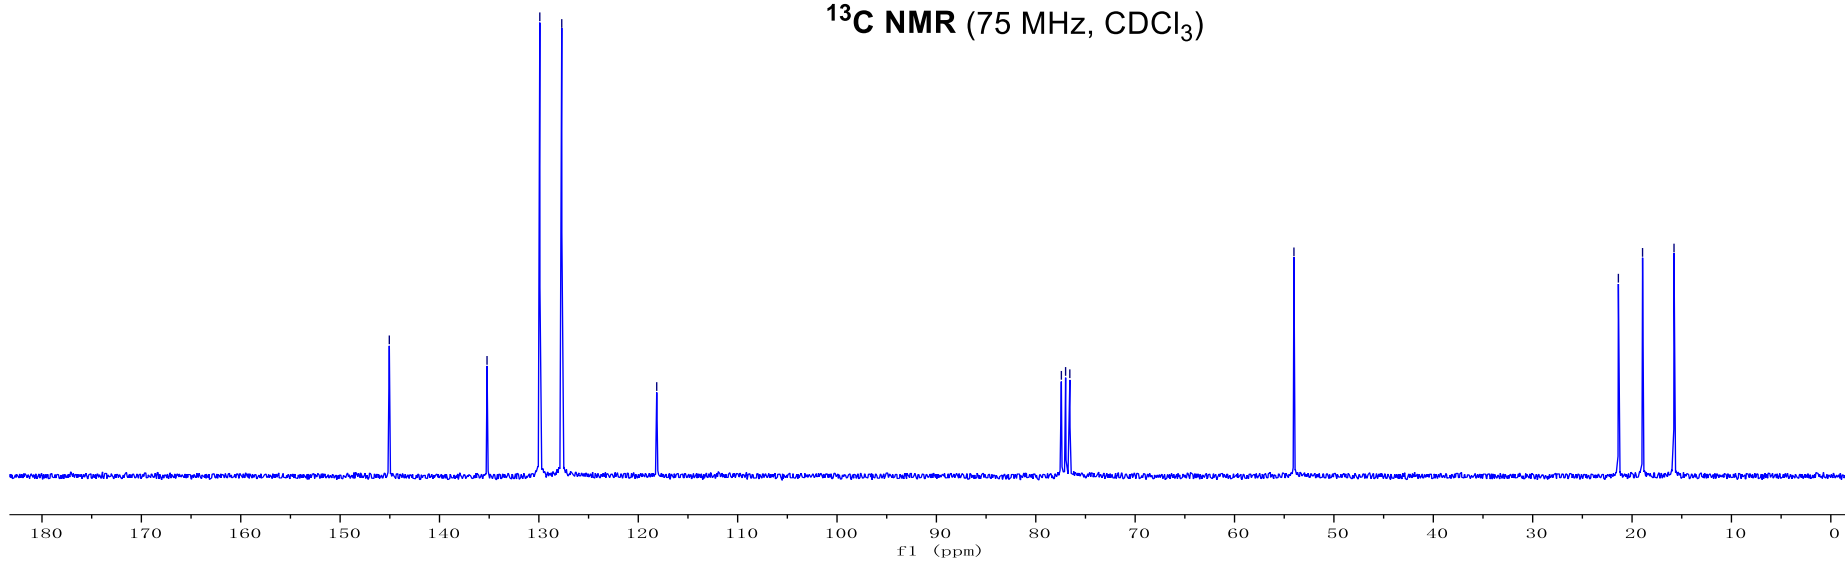

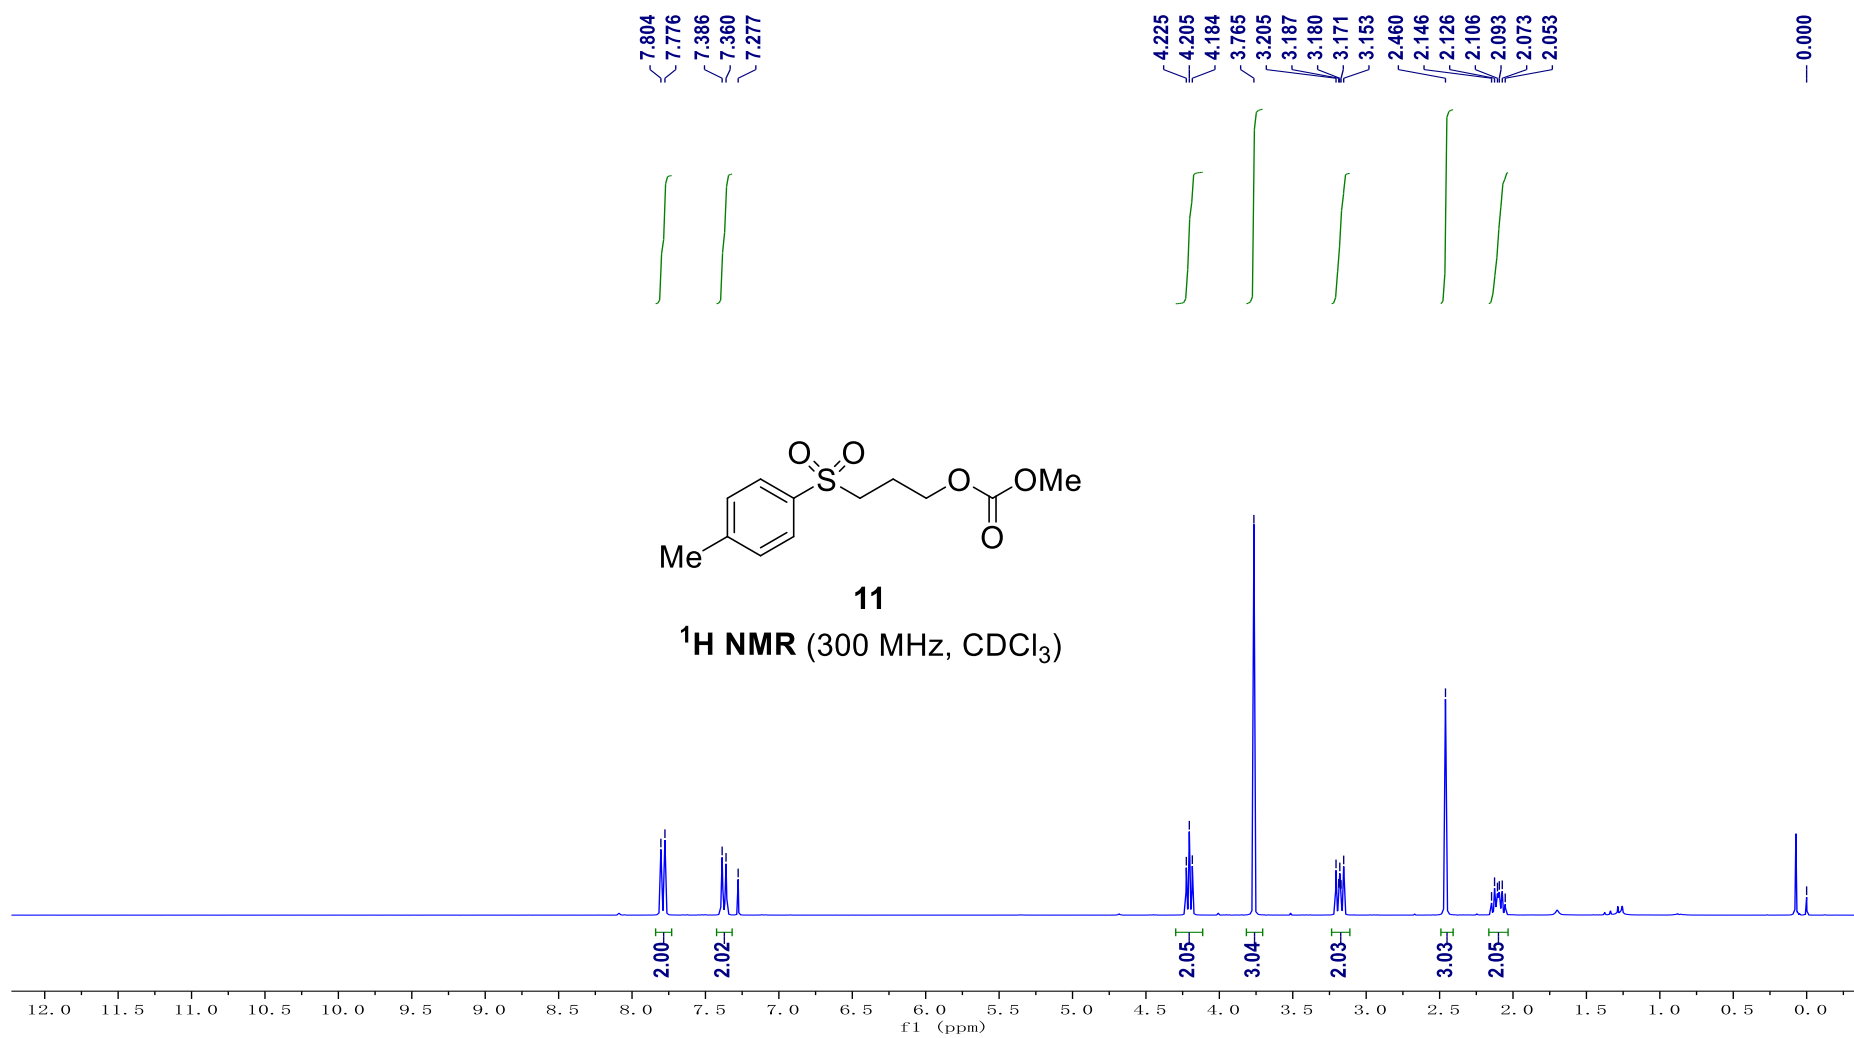

— 155.327

— 144.901

— 135.744

— 129.960

— 128.029

{ 77.424  
77.000  
76.577

— 65.556

— 54.886  
— 52.944

{ 22.491  
21.592

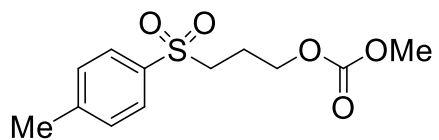

**11**

**<sup>13</sup>C NMR (75 MHz, CDCl<sub>3</sub>)**

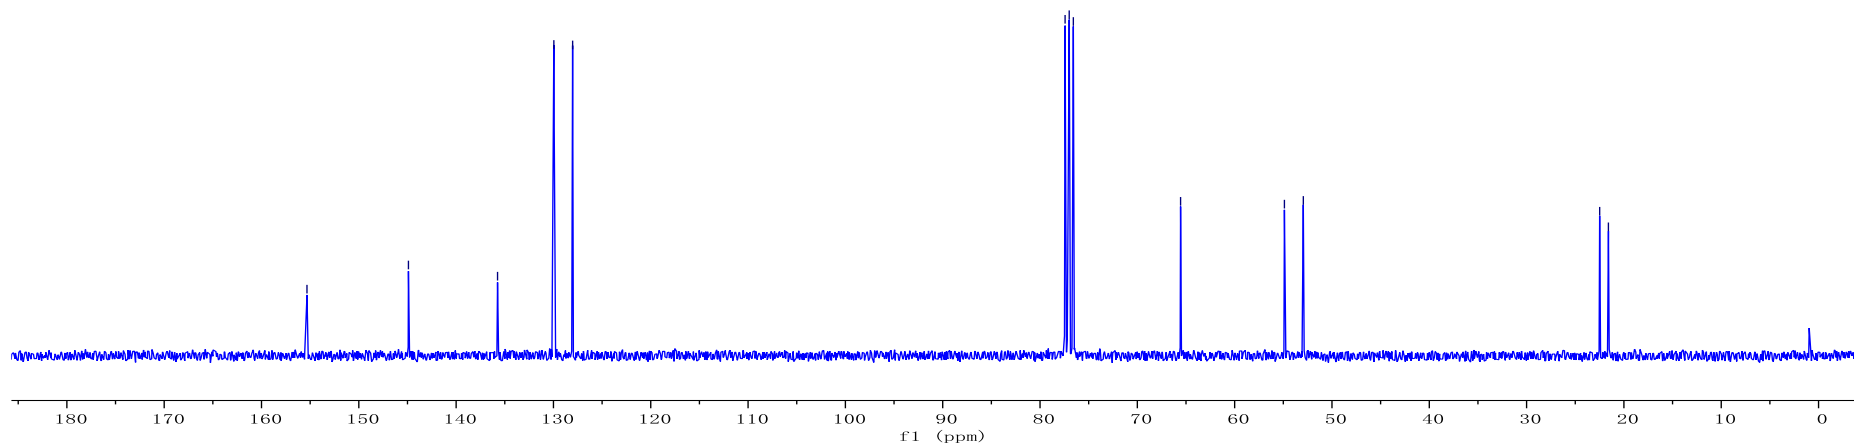



7.843  
7.832  
7.824  
7.814  
7.806  
7.778  
7.771  
7.761  
7.753  
7.742  
7.375  
7.348  
7.286

4.183  
4.163  
4.142

3.151  
3.126  
3.099

2.443  
1.846  
1.822  
1.797  
1.782  
1.761  
1.744  
1.715  
1.667  
1.643  
1.620  
1.591  
1.567

-0.000

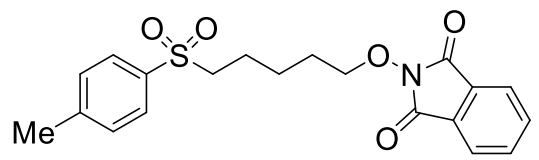

12

<sup>1</sup>H NMR (300 MHz, CDCl<sub>3</sub>)

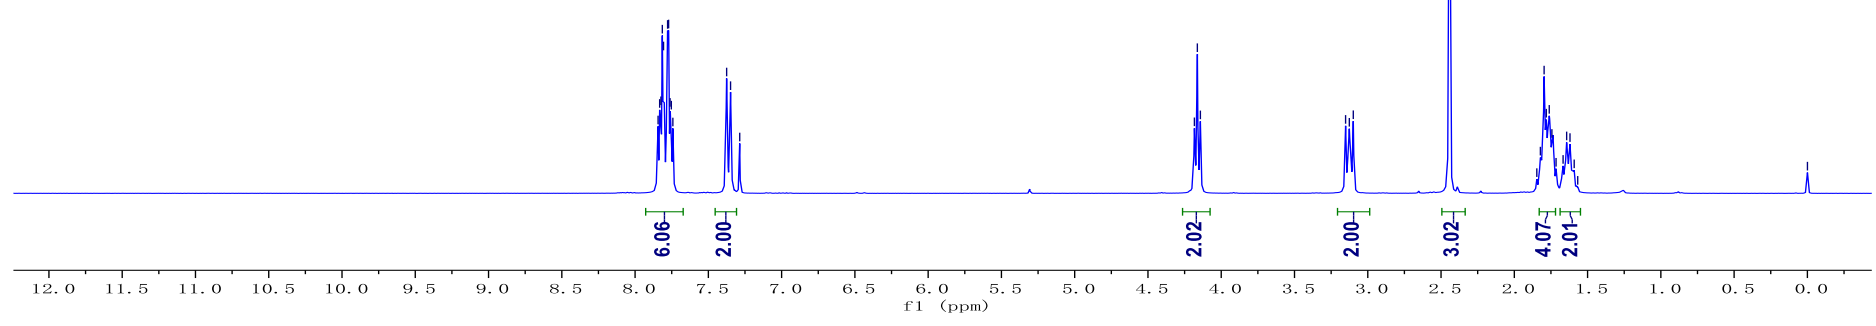

— 163.486

— 144.535

— 136.028

— 134.458

— 129.810

— 128.763

— 127.993

— 123.428

77.790

77.318

77.000

76.682

— 56.012

— 27.539

— 24.421

— 22.424

— 21.521

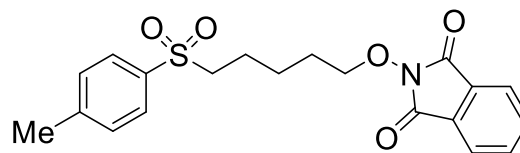

**12**

**<sup>13</sup>C NMR (100 MHz, CDCl<sub>3</sub>)**

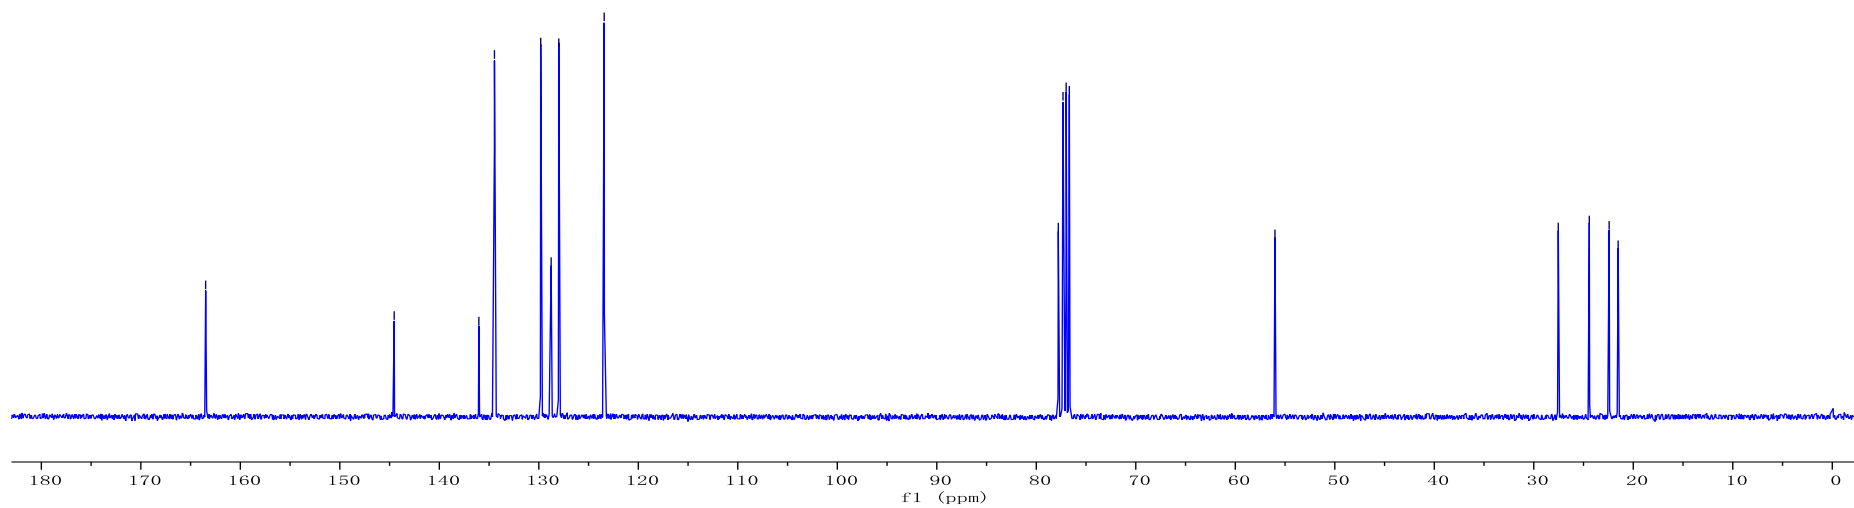

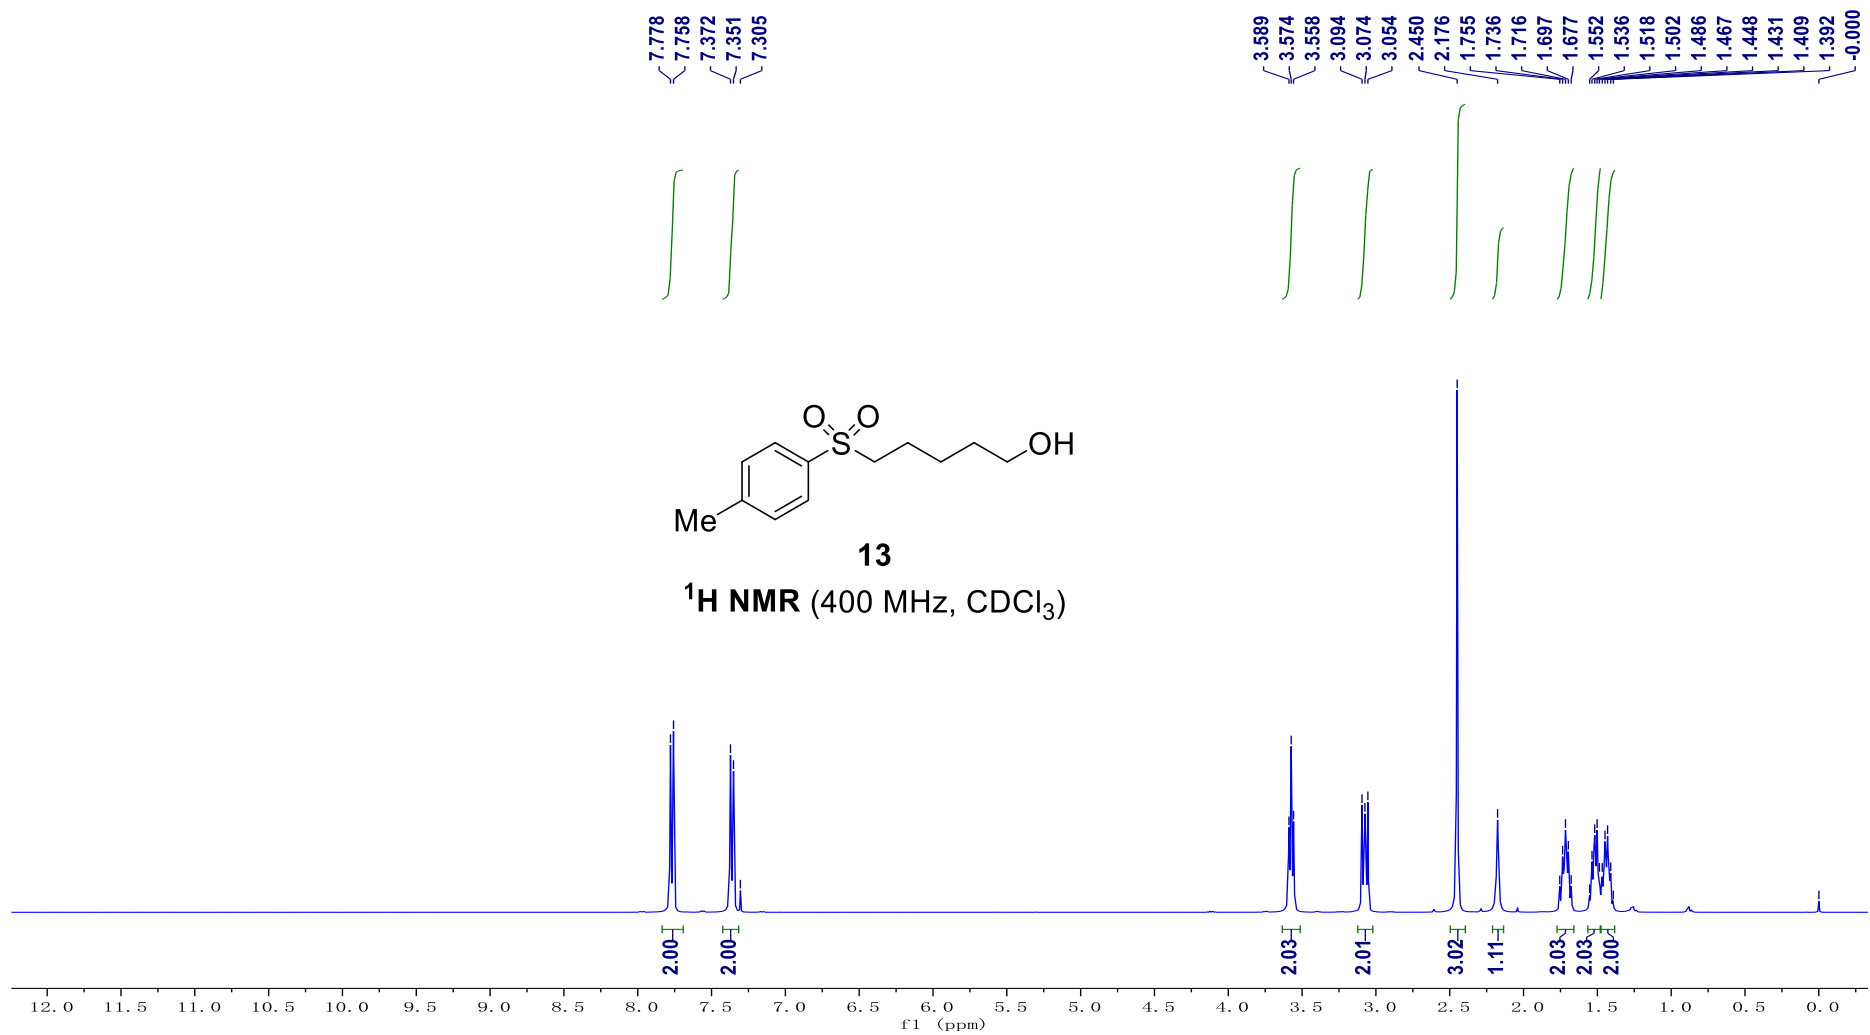

— 144.635

— 135.970

— 129.848

— 127.955

77.318

77.000

76.682

— 62.064

— 56.183

— 31.855

24.460

22.439

21.558

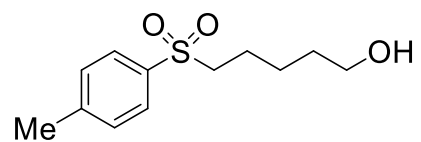

**13**

**<sup>13</sup>C NMR (100 MHz, CDCl<sub>3</sub>)**

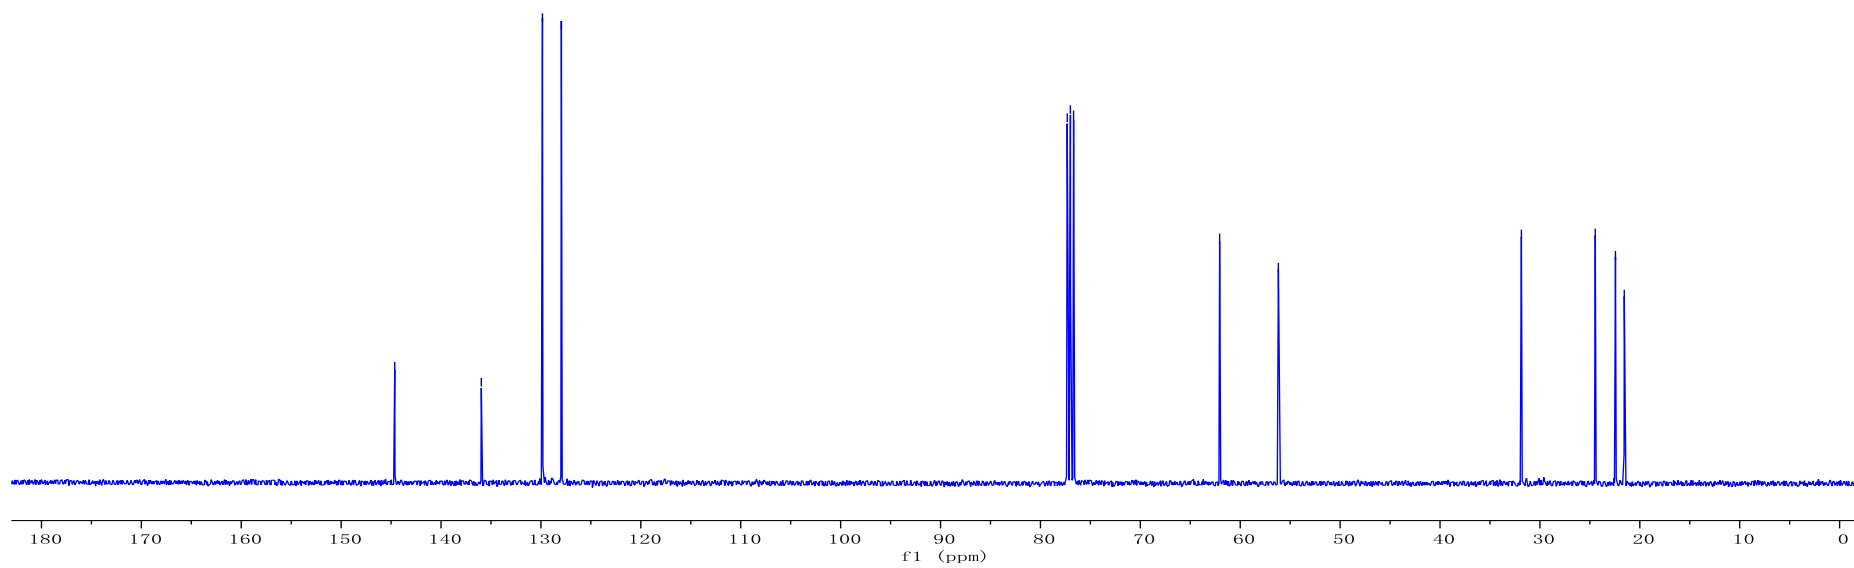

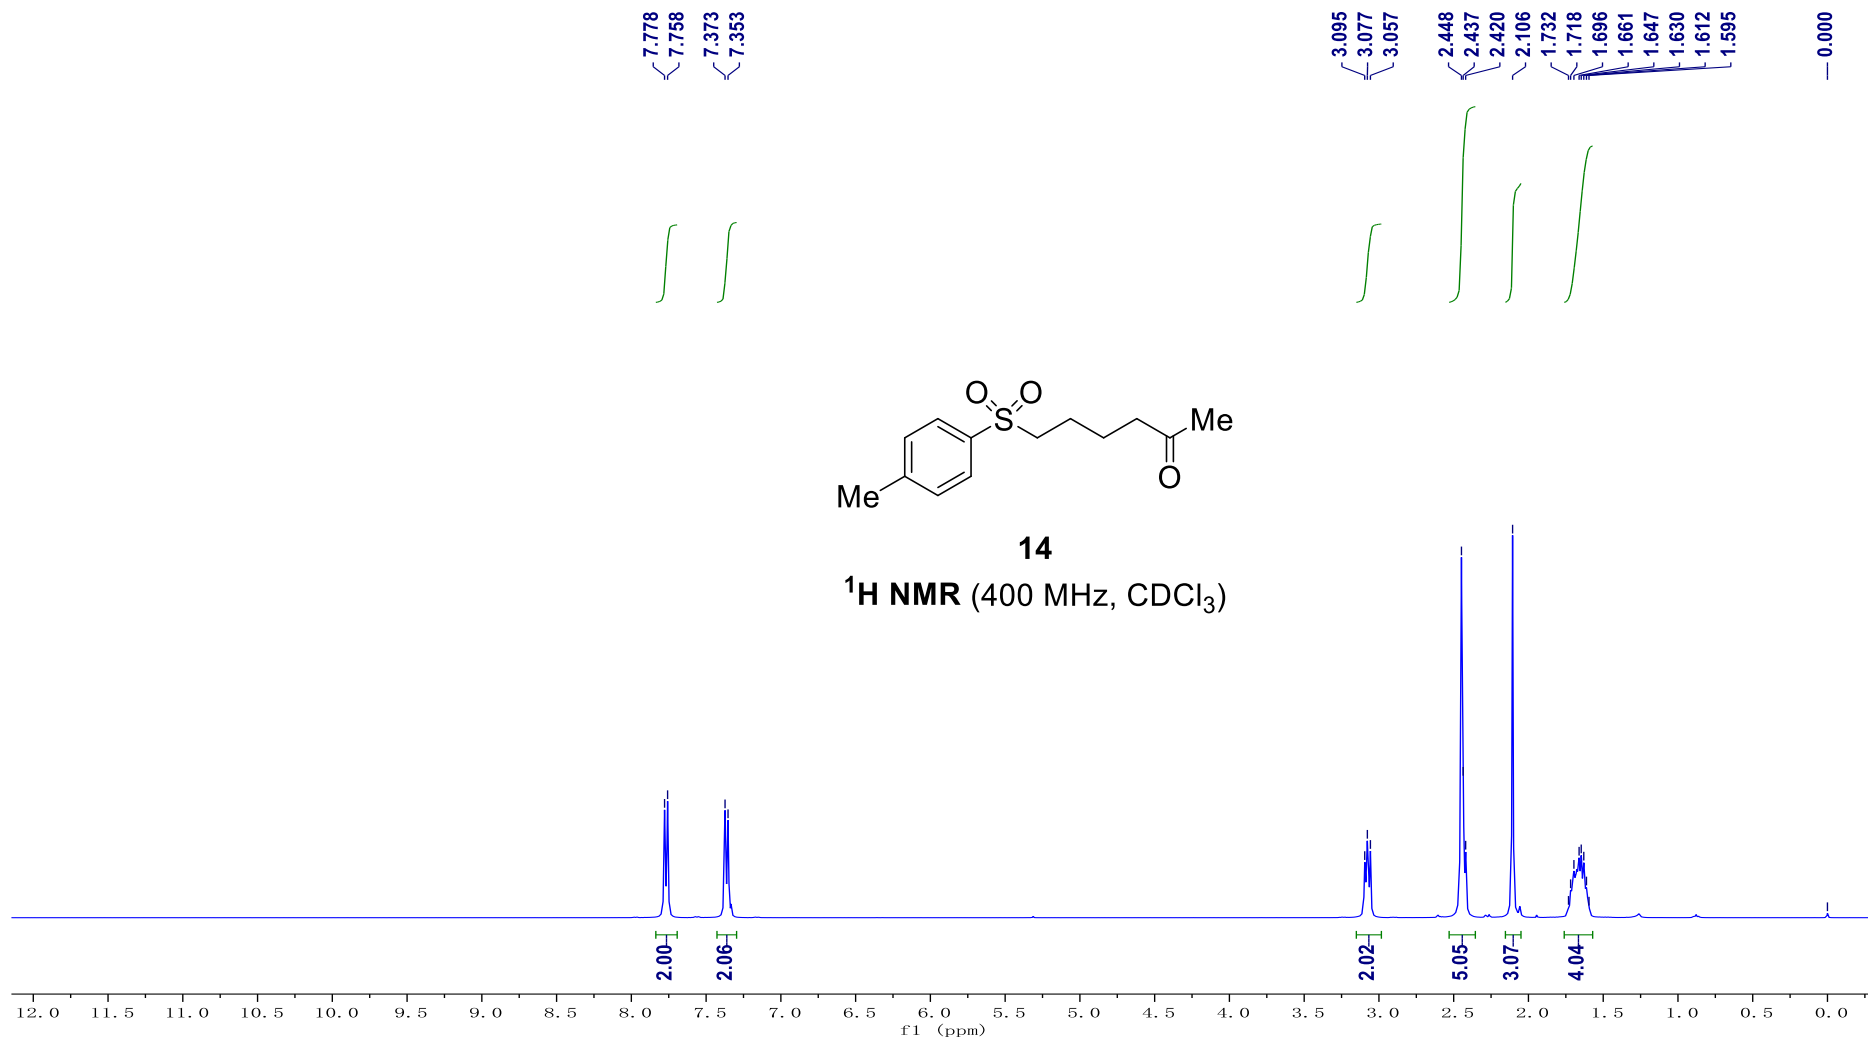

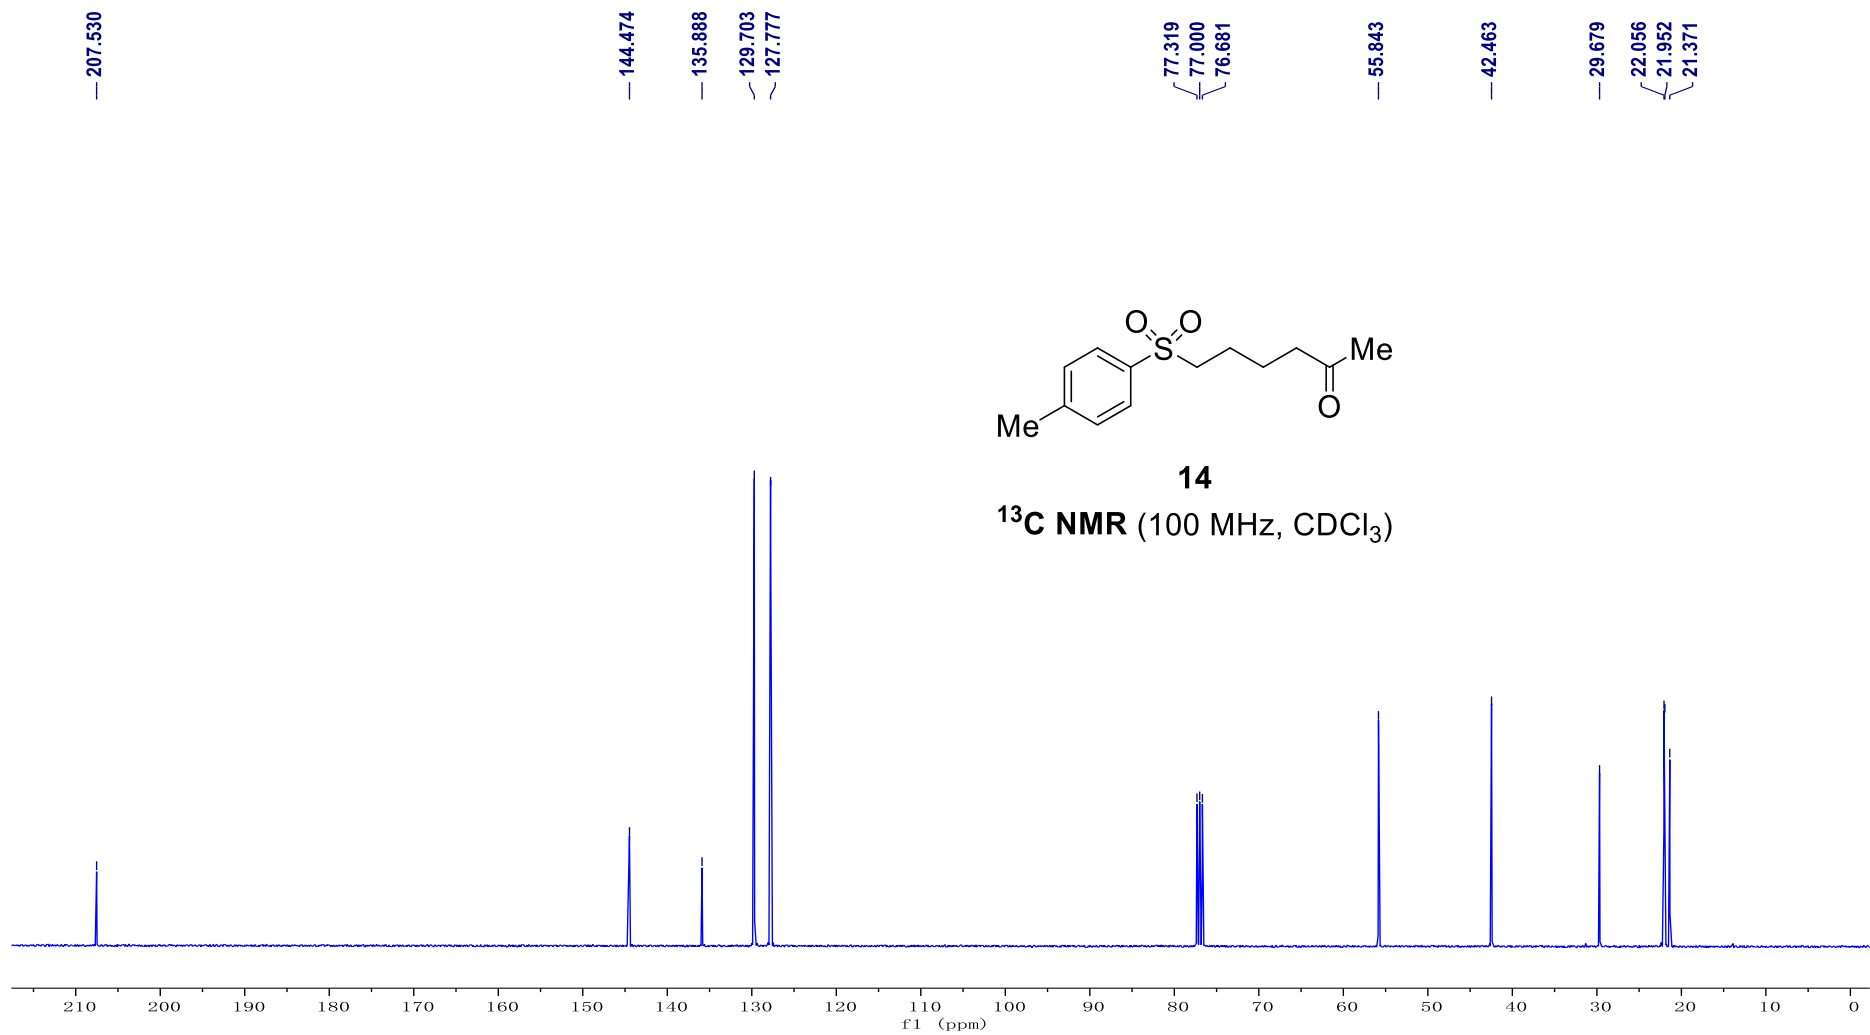

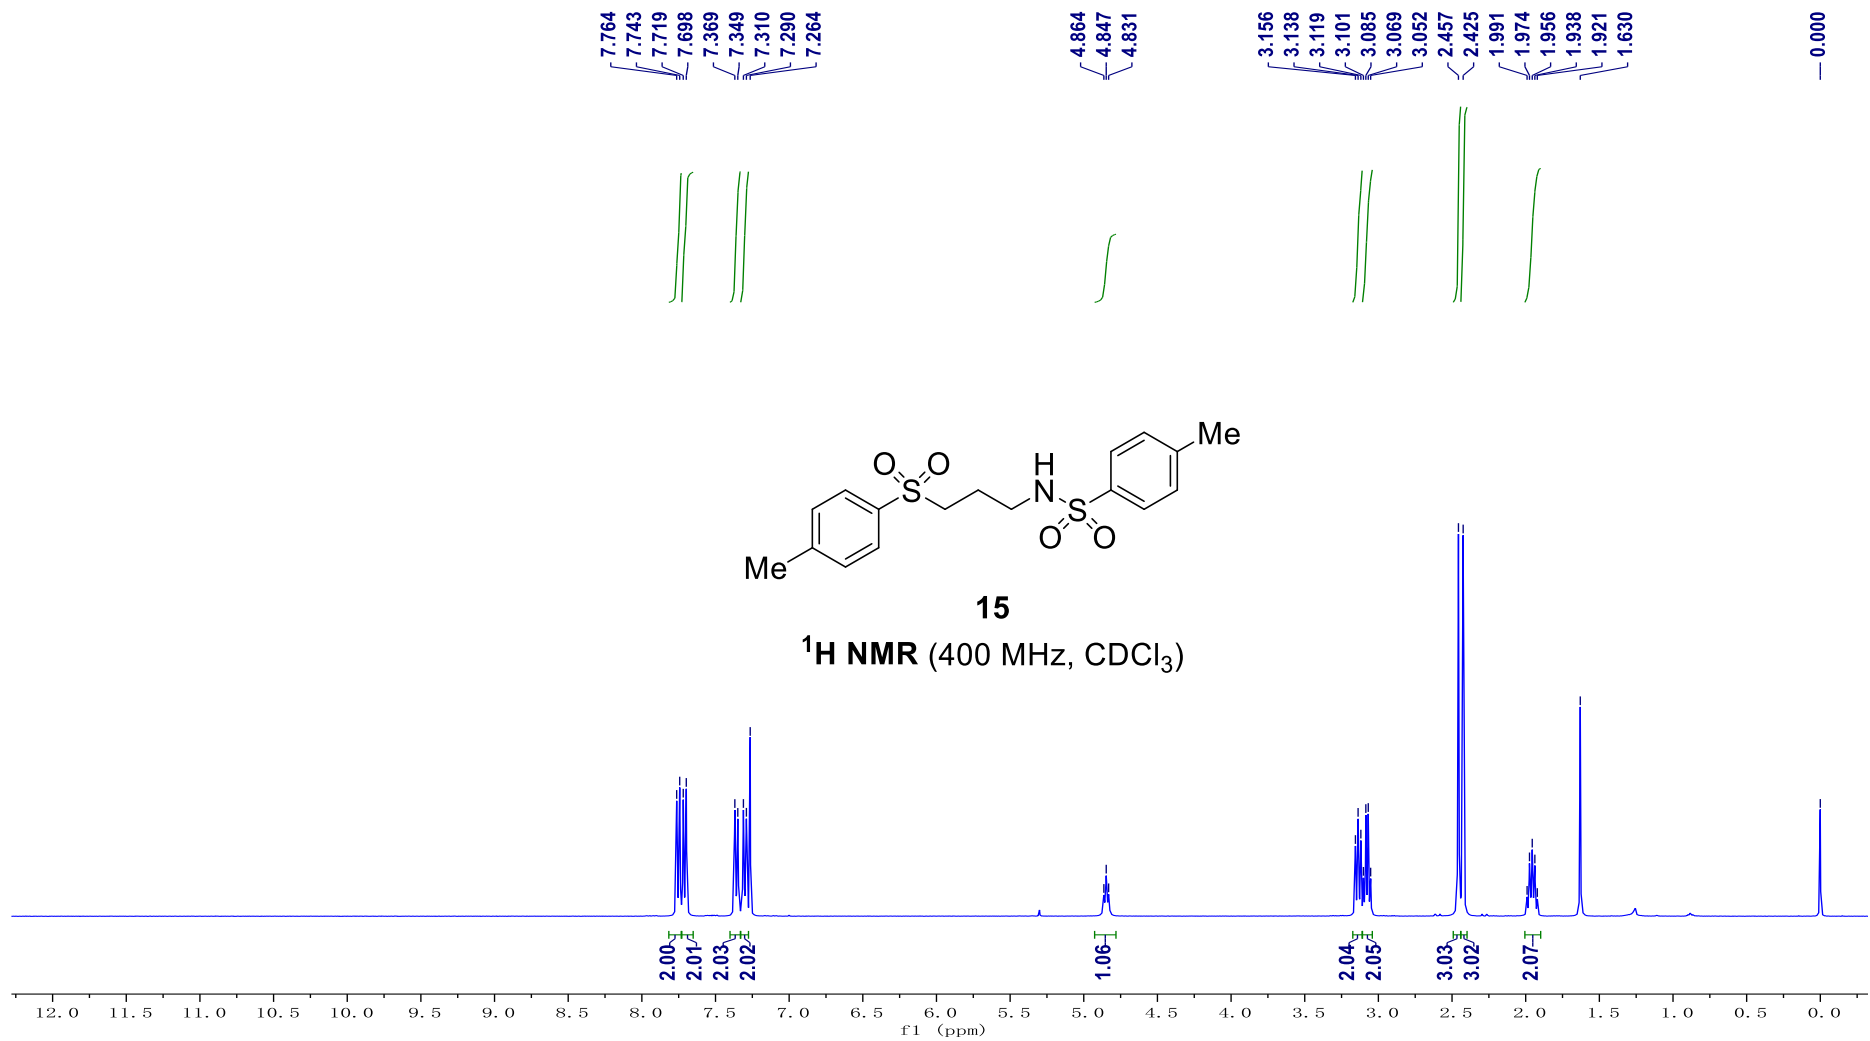

144.953  
 143.643  
 136.628  
 135.930  
 130.007  
 129.812  
 127.953  
 126.985  
 77.317  
 77.000  
 76.682  
 53.242  
 41.363  
 23.137  
 21.629  
 21.510

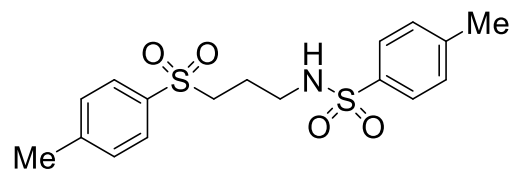

**15**

**<sup>13</sup>C NMR (100 MHz, CDCl<sub>3</sub>)**

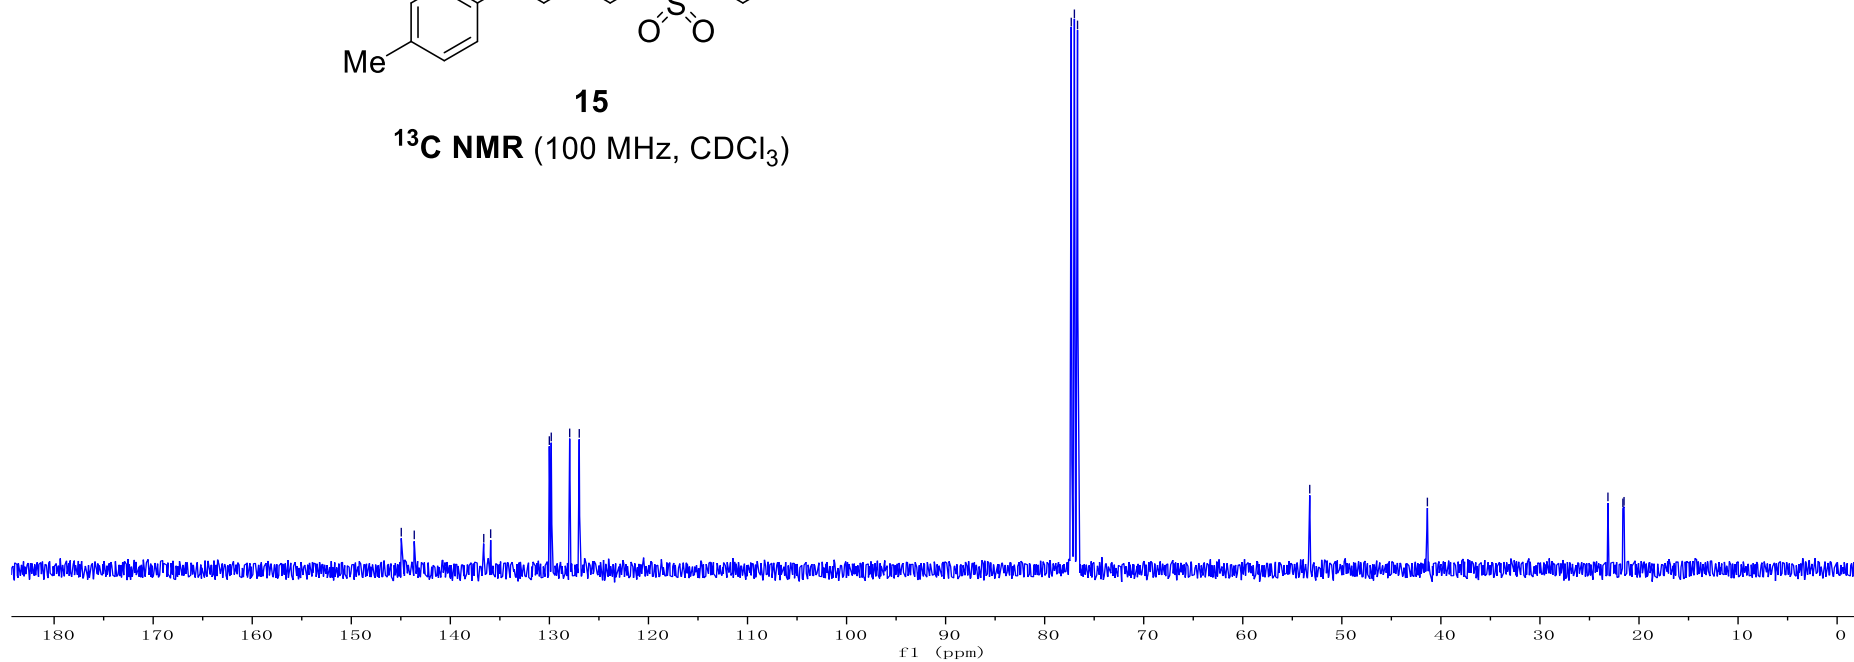



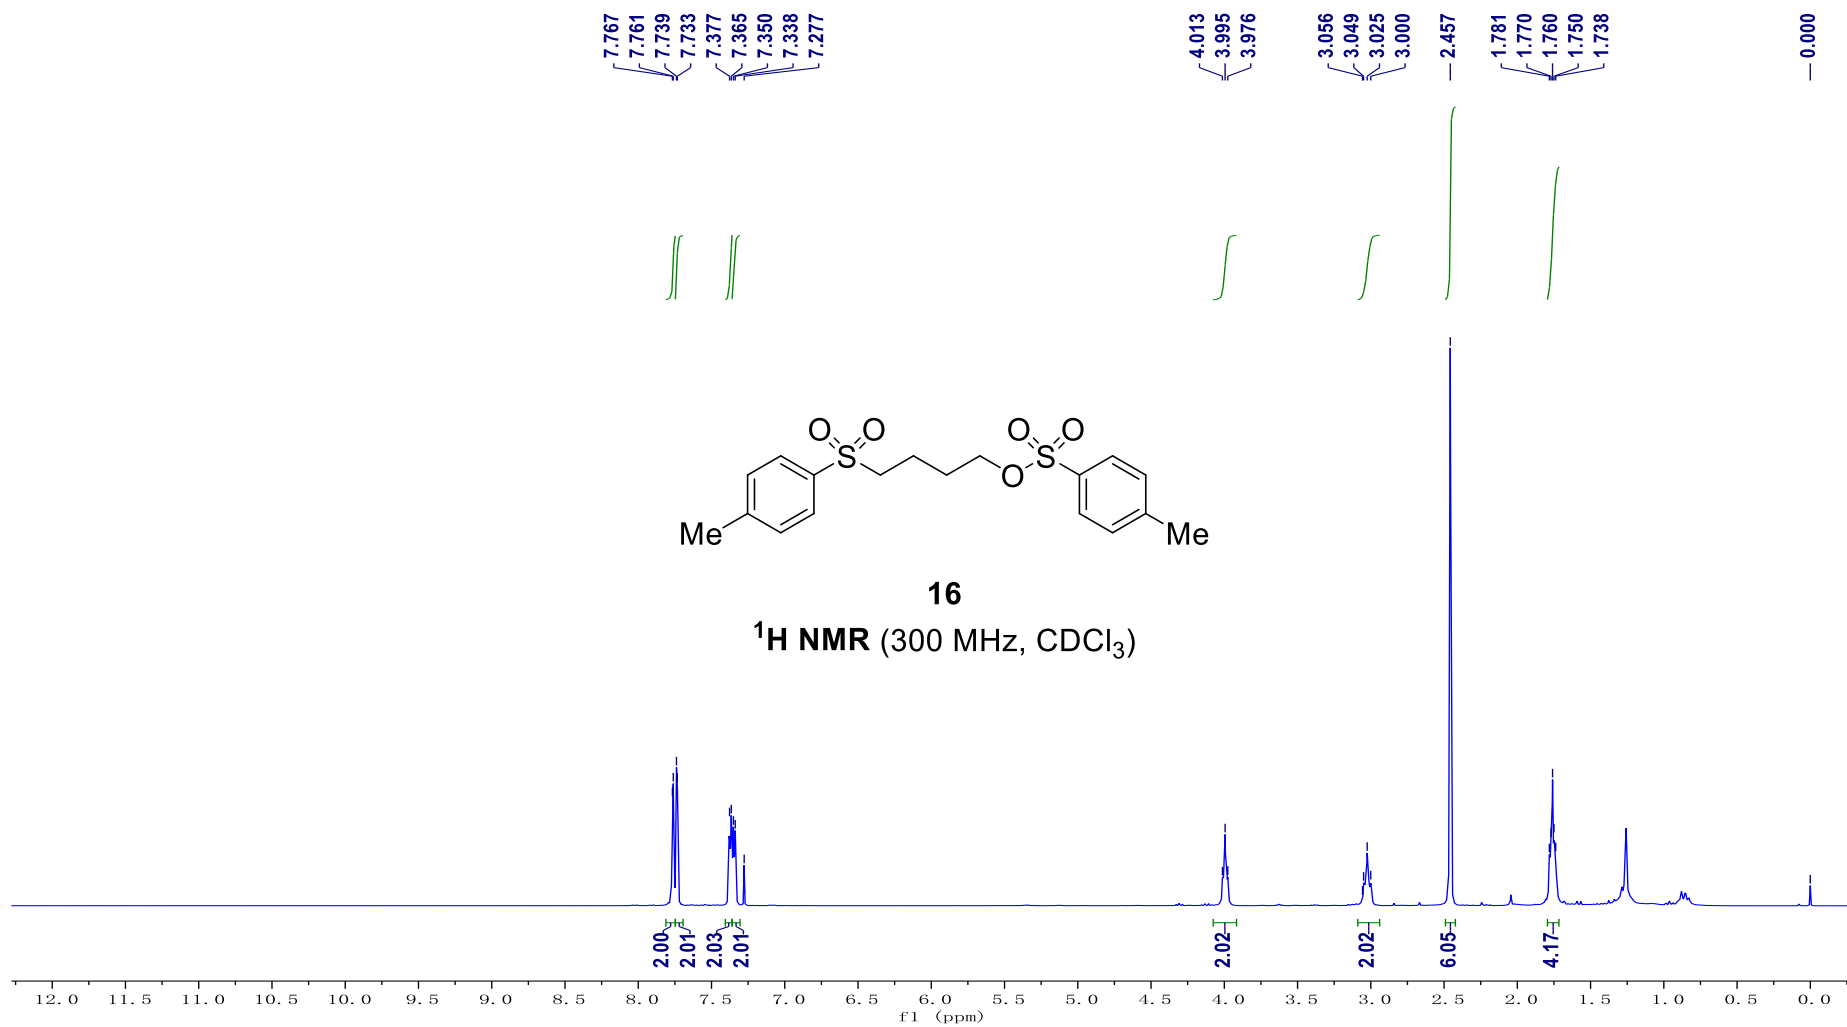

145.000  
144.849  
135.859  
132.685  
129.966  
129.931  
127.979  
127.815

77.318  
77.000  
76.682  
69.250  
55.308

27.361  
21.619  
21.605  
19.189

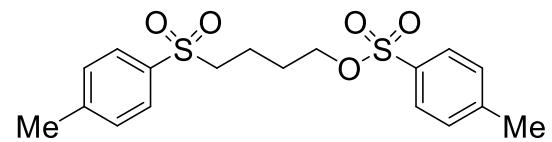

16

<sup>13</sup>C NMR (100 MHz, CDCl<sub>3</sub>)

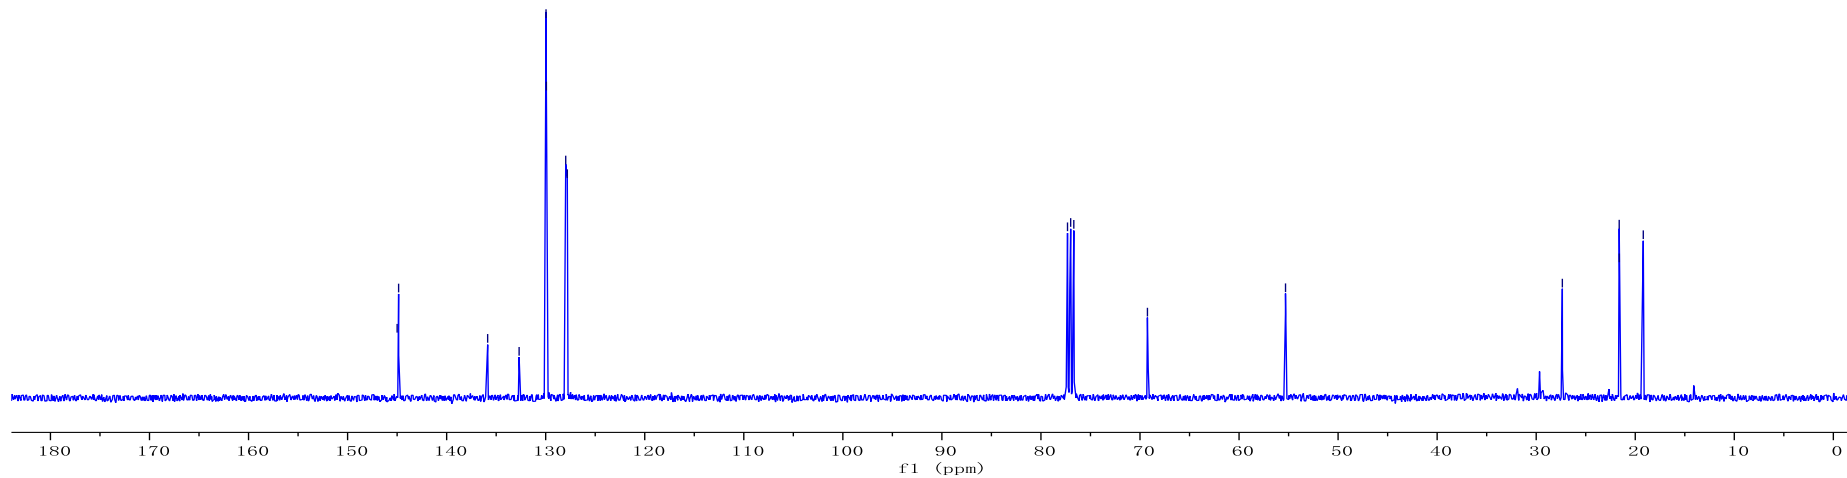

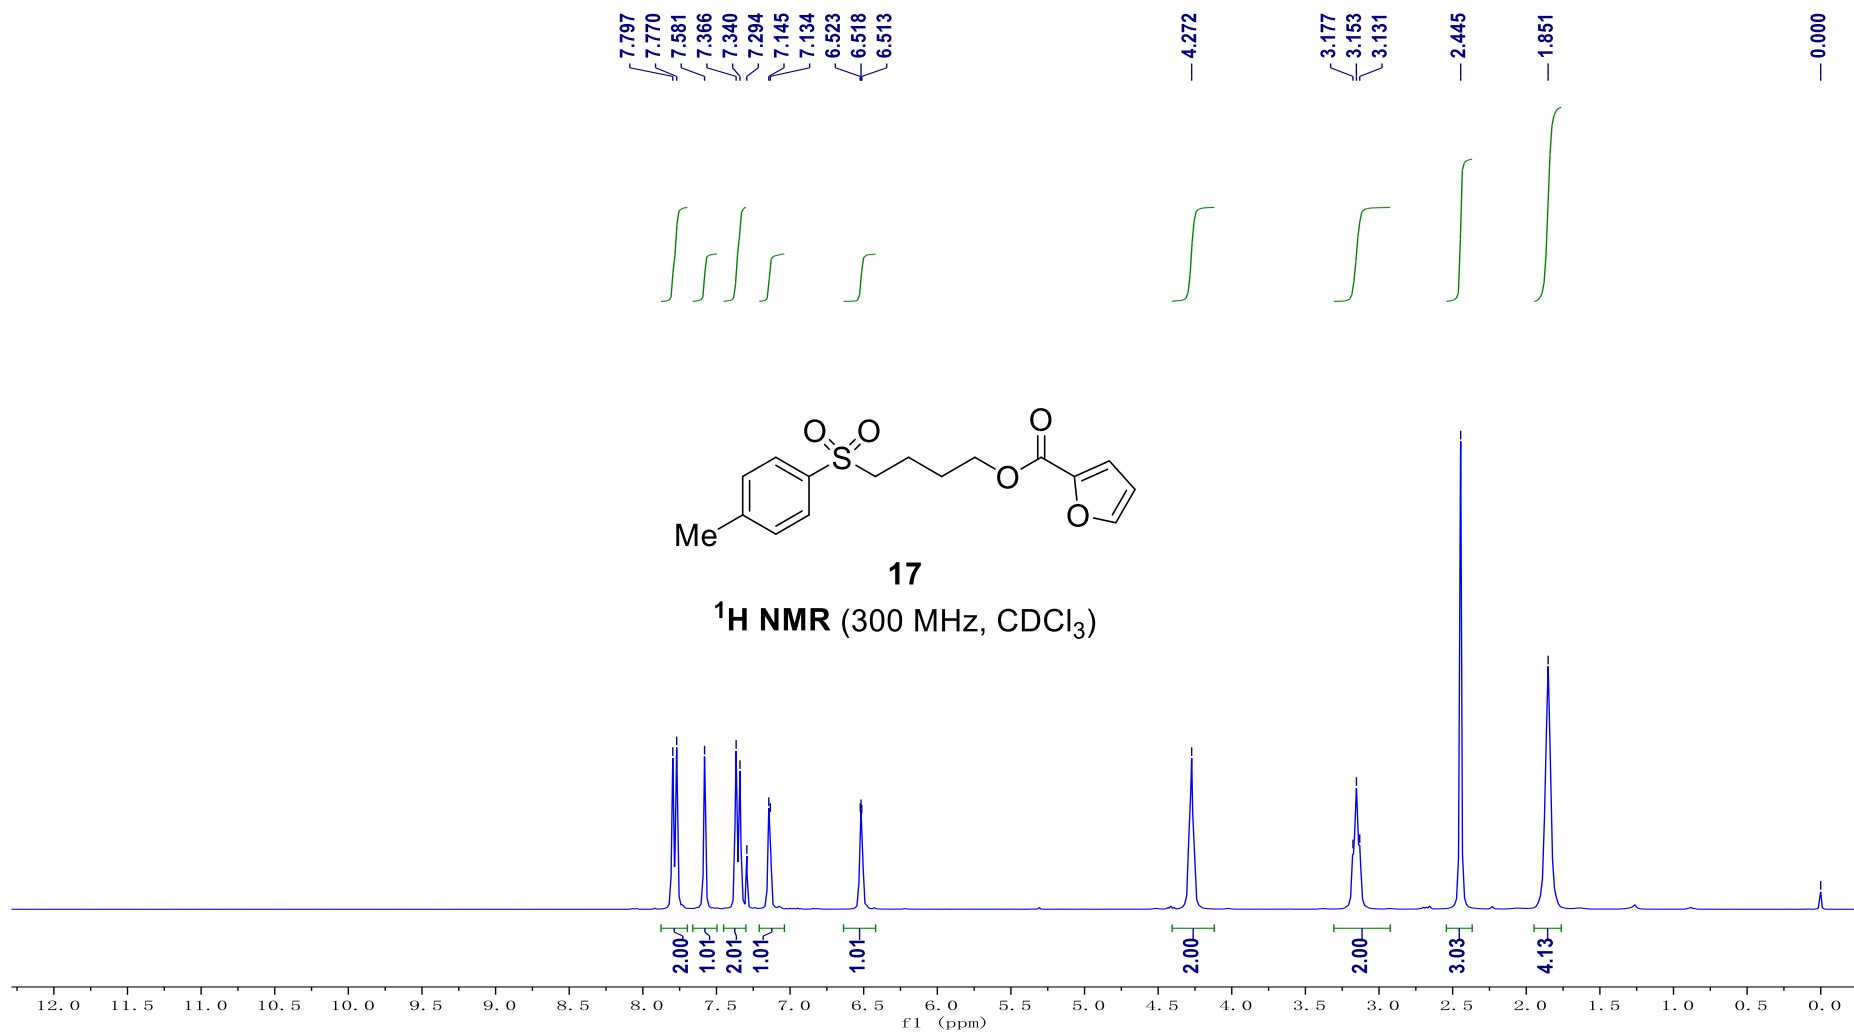

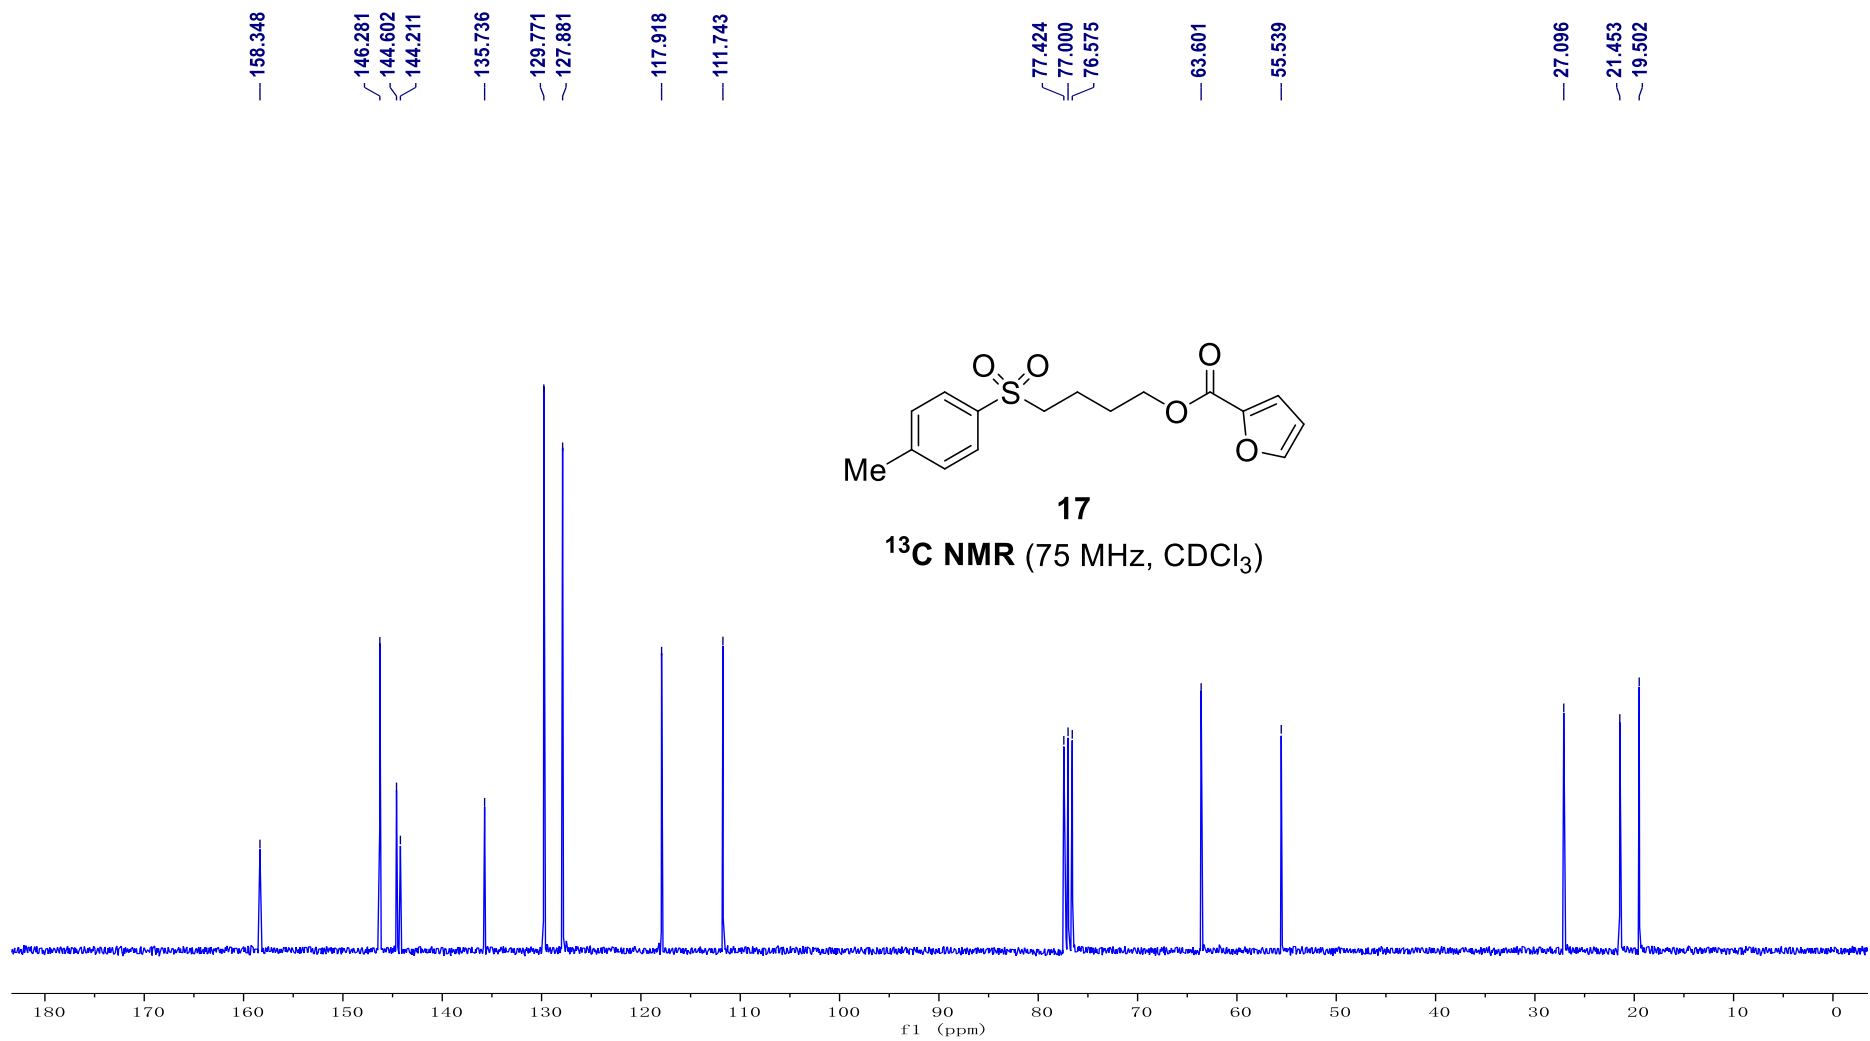

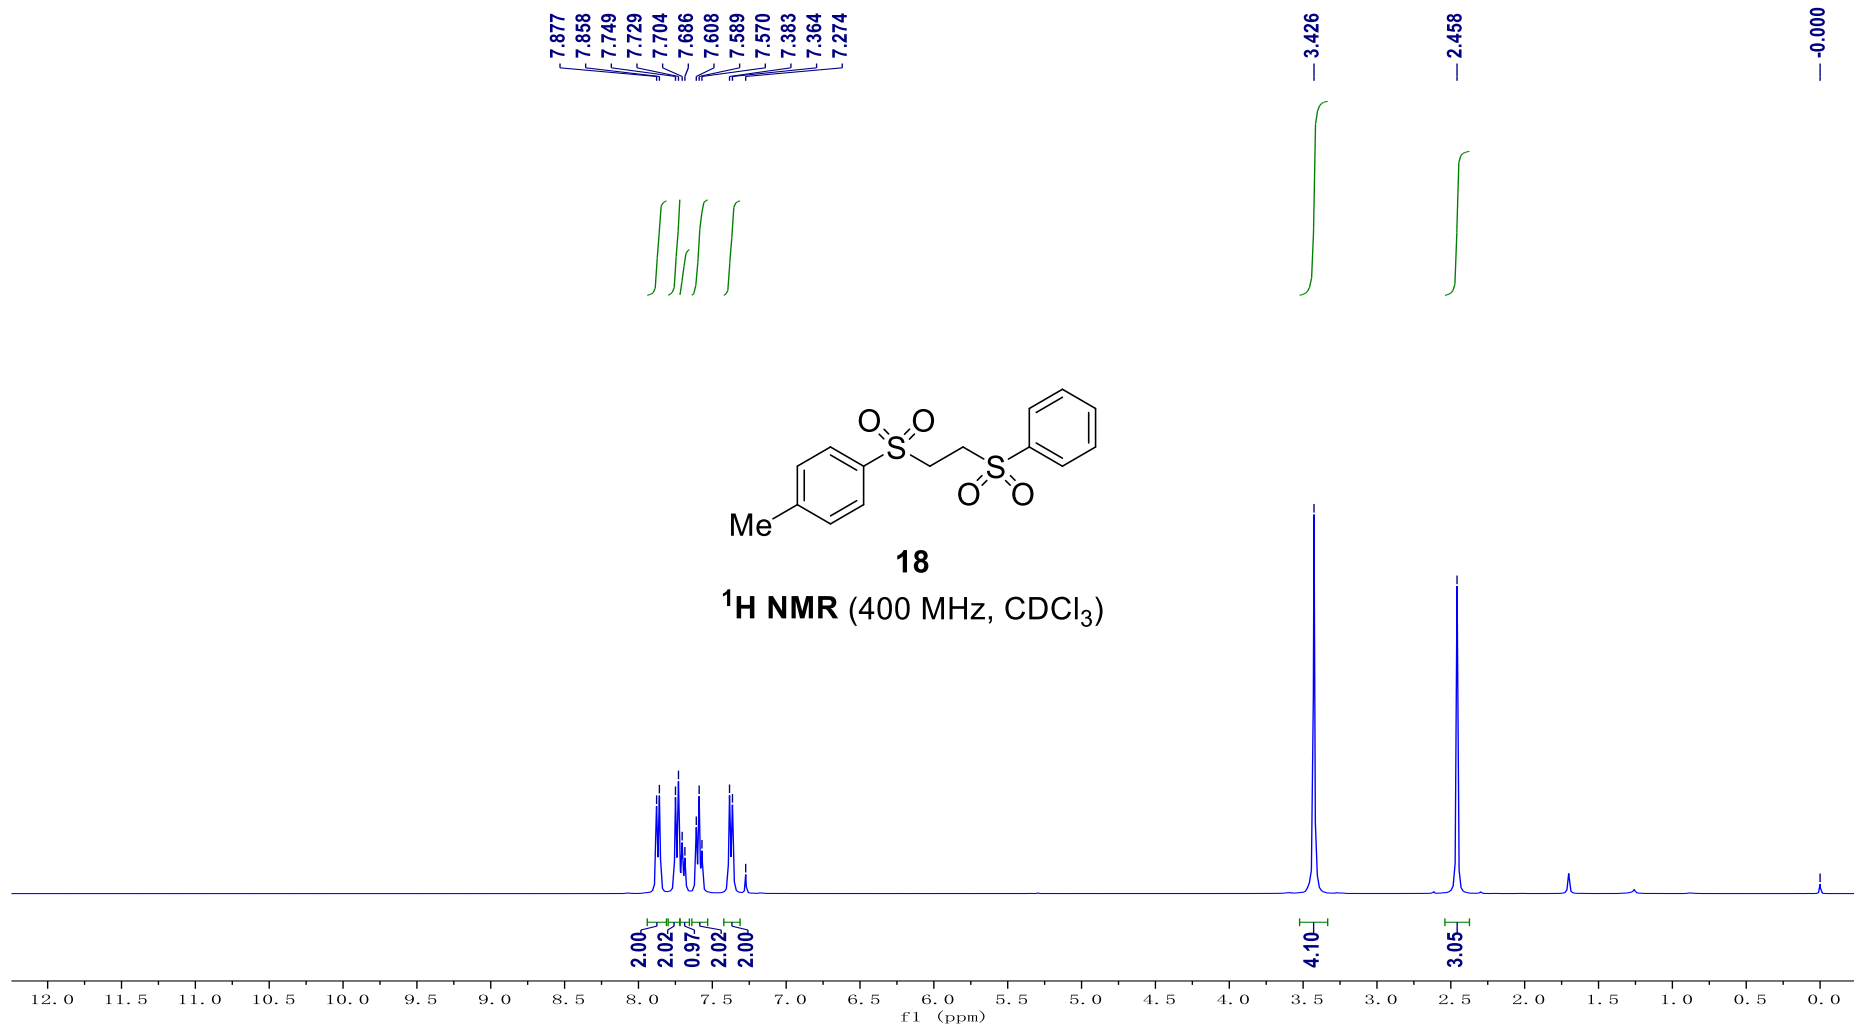

— 145.685  
/ 137.971  
/ 134.945  
/ 134.435  
/ 130.227  
/ 129.607  
/ 127.998  
/ 127.978

77.318  
77.000  
76.682

49.539  
49.497

— 21.602

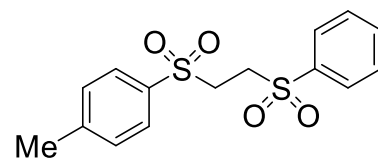

**18**

**<sup>13</sup>C NMR (100 MHz, CDCl<sub>3</sub>)**

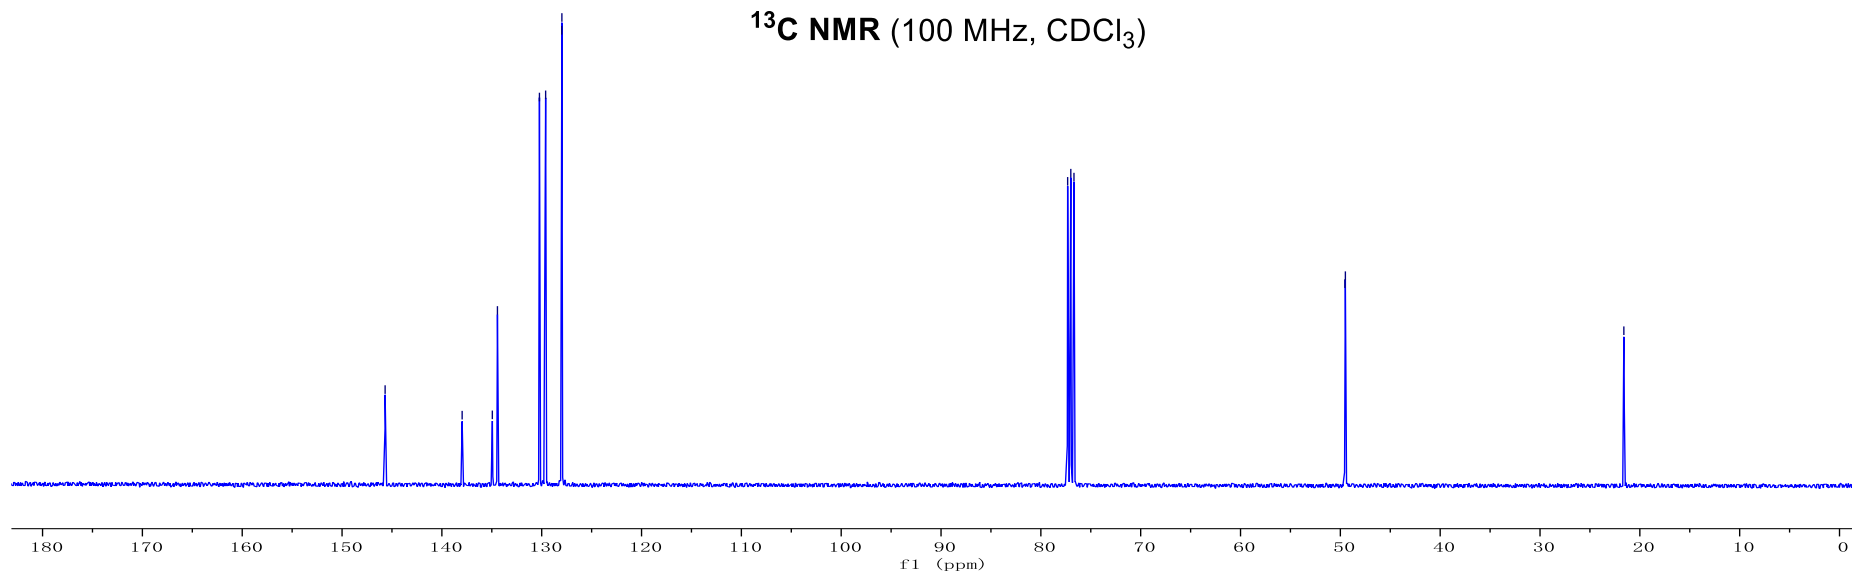

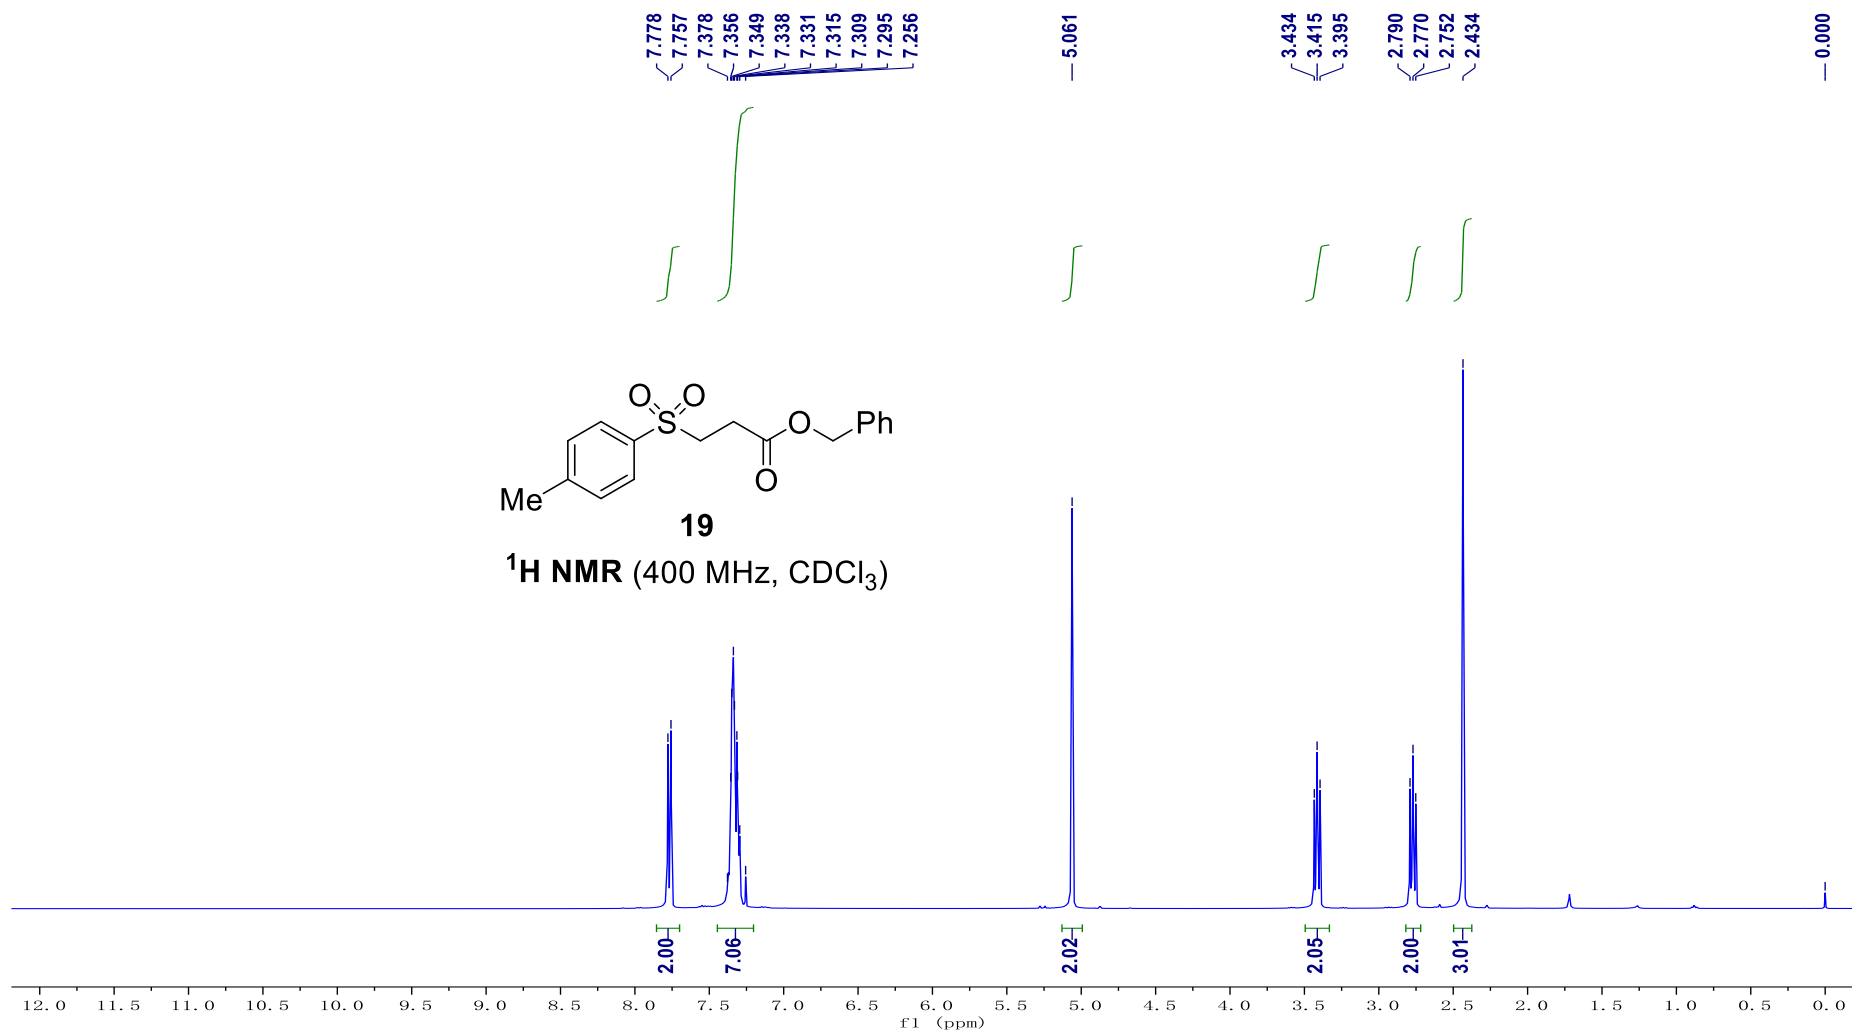

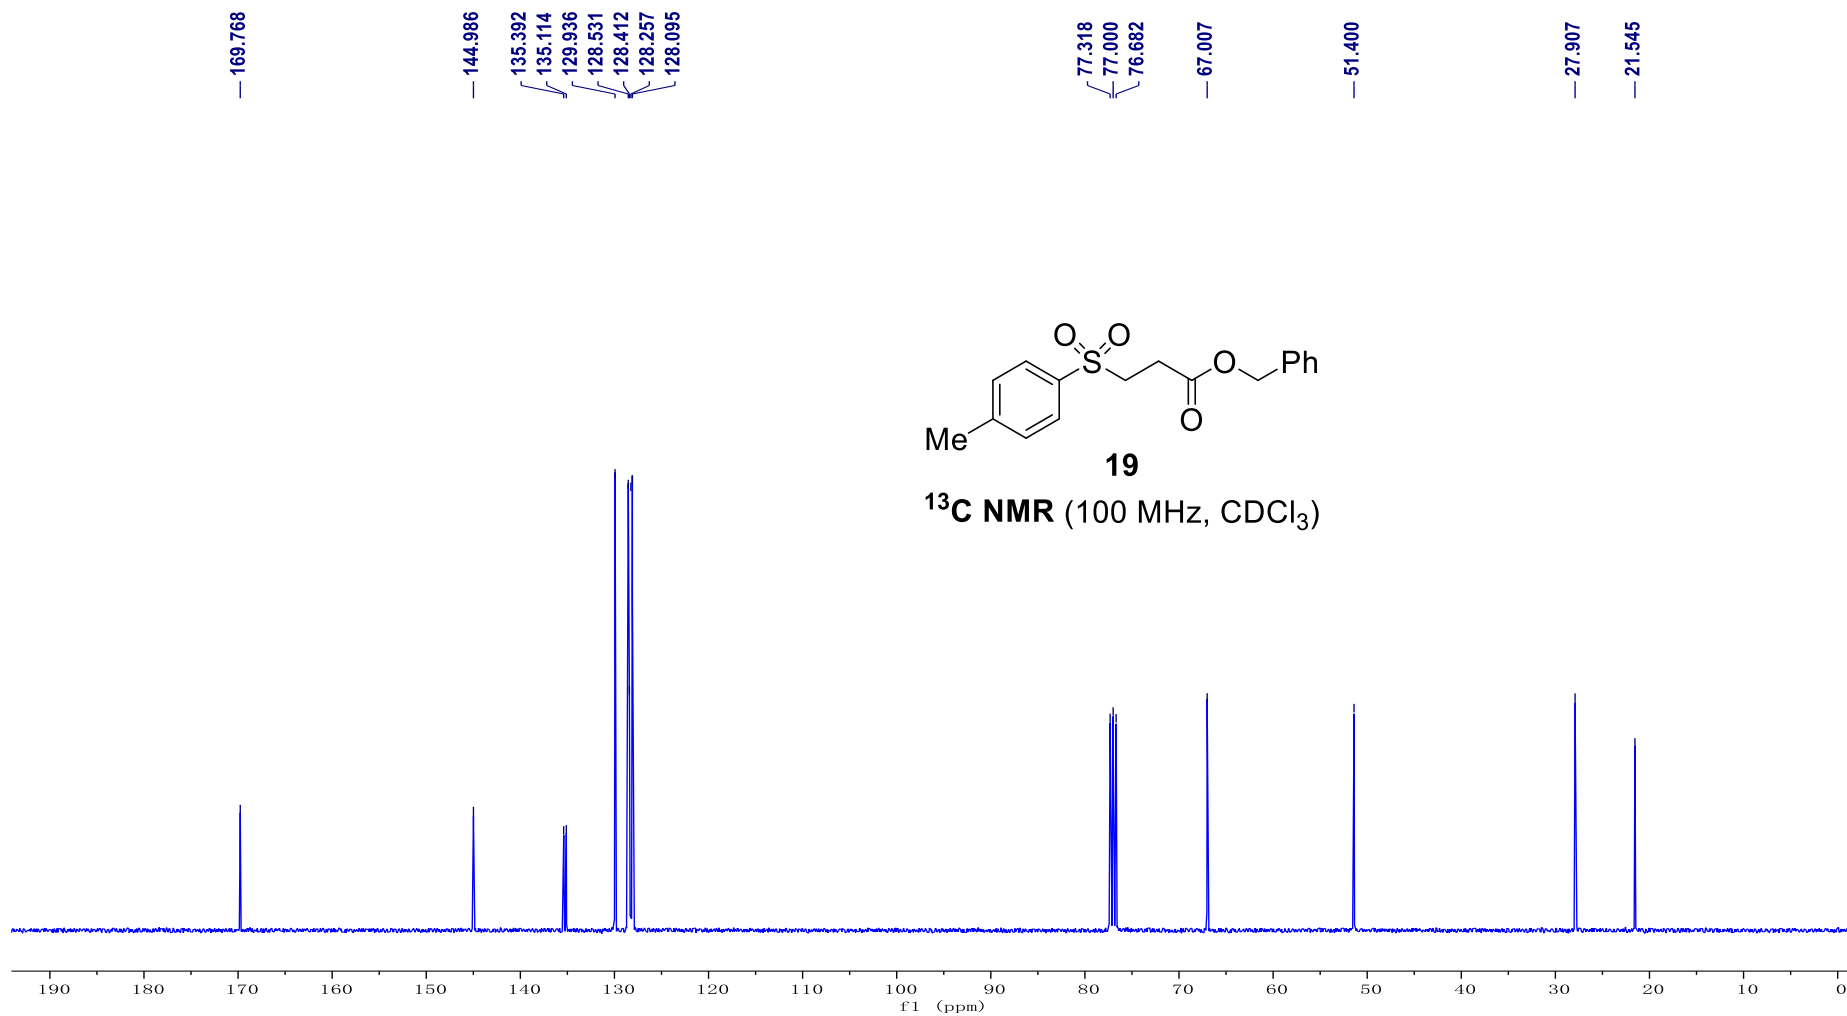



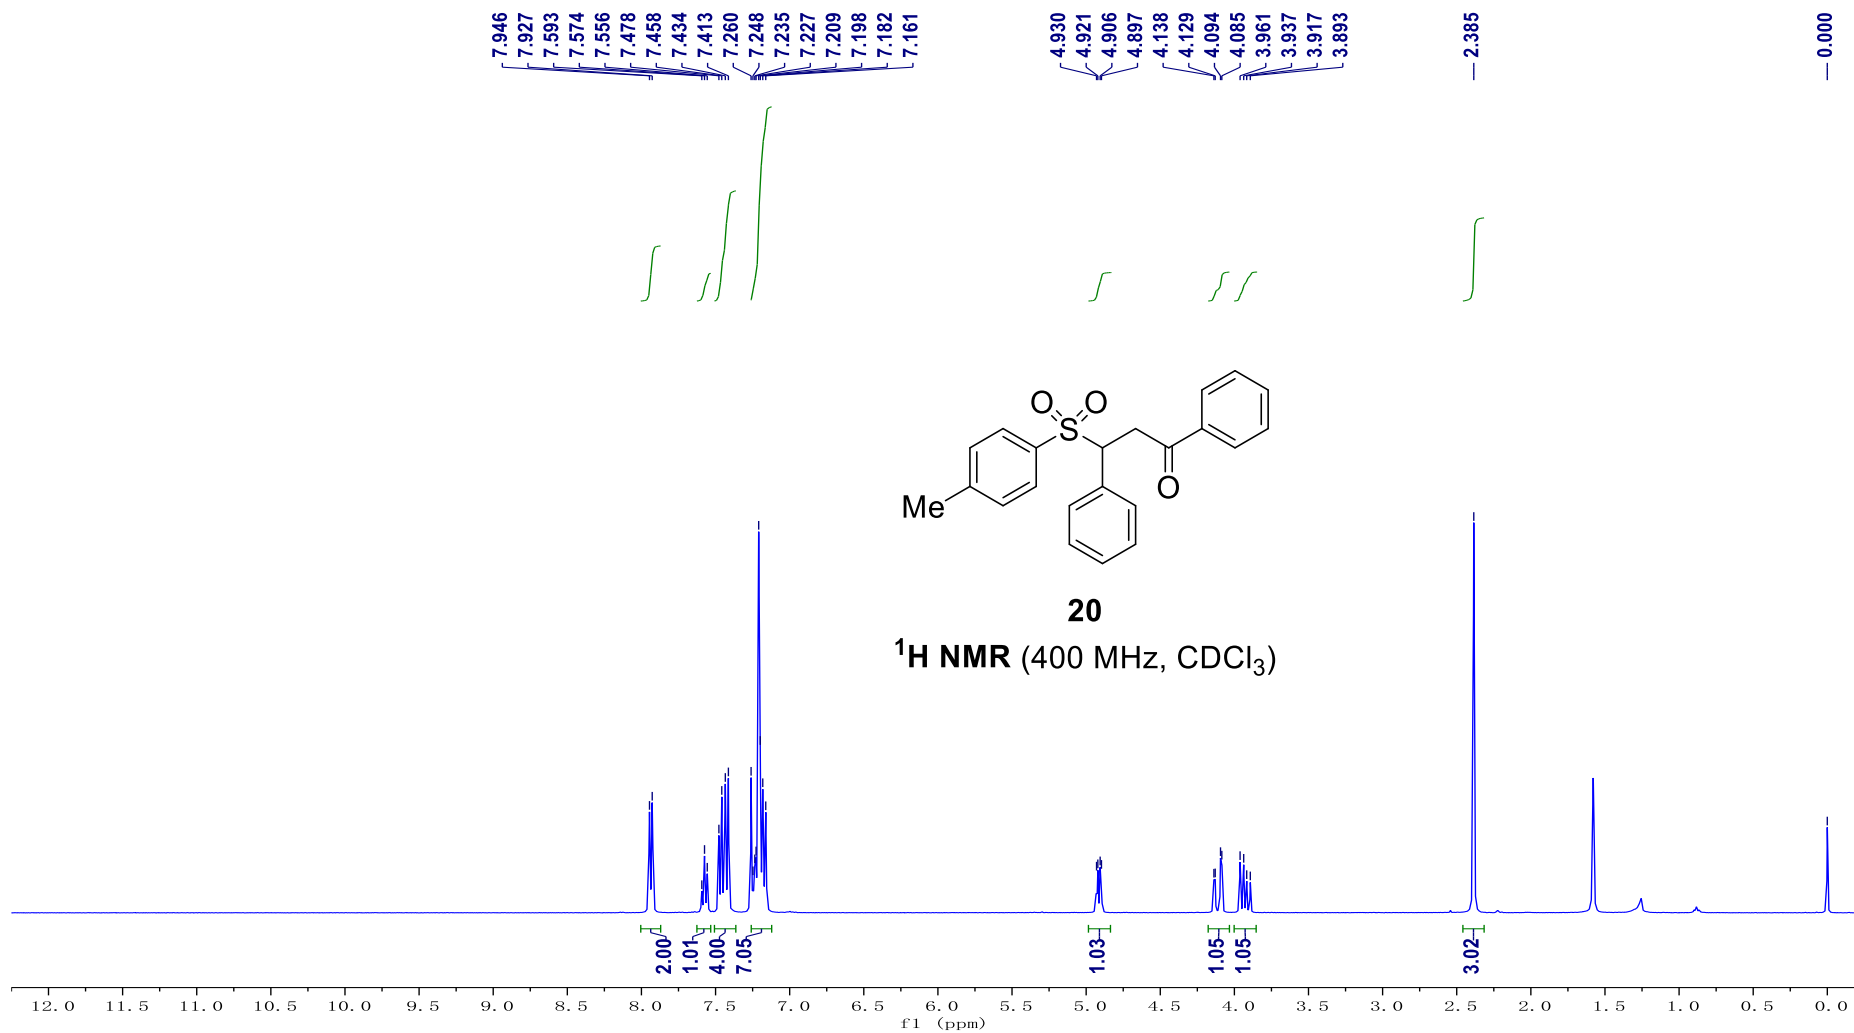

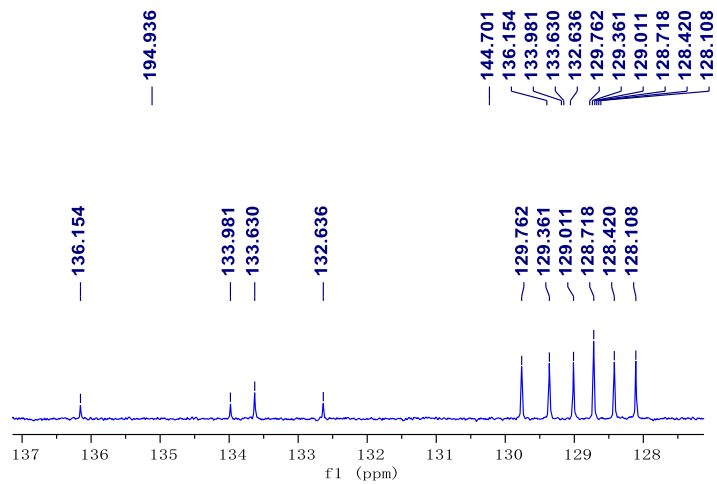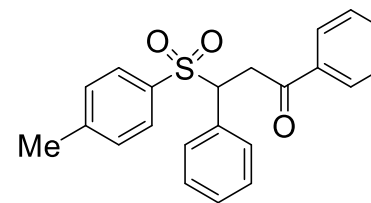

**20**

**<sup>13</sup>C NMR (100 MHz, CDCl<sub>3</sub>)**

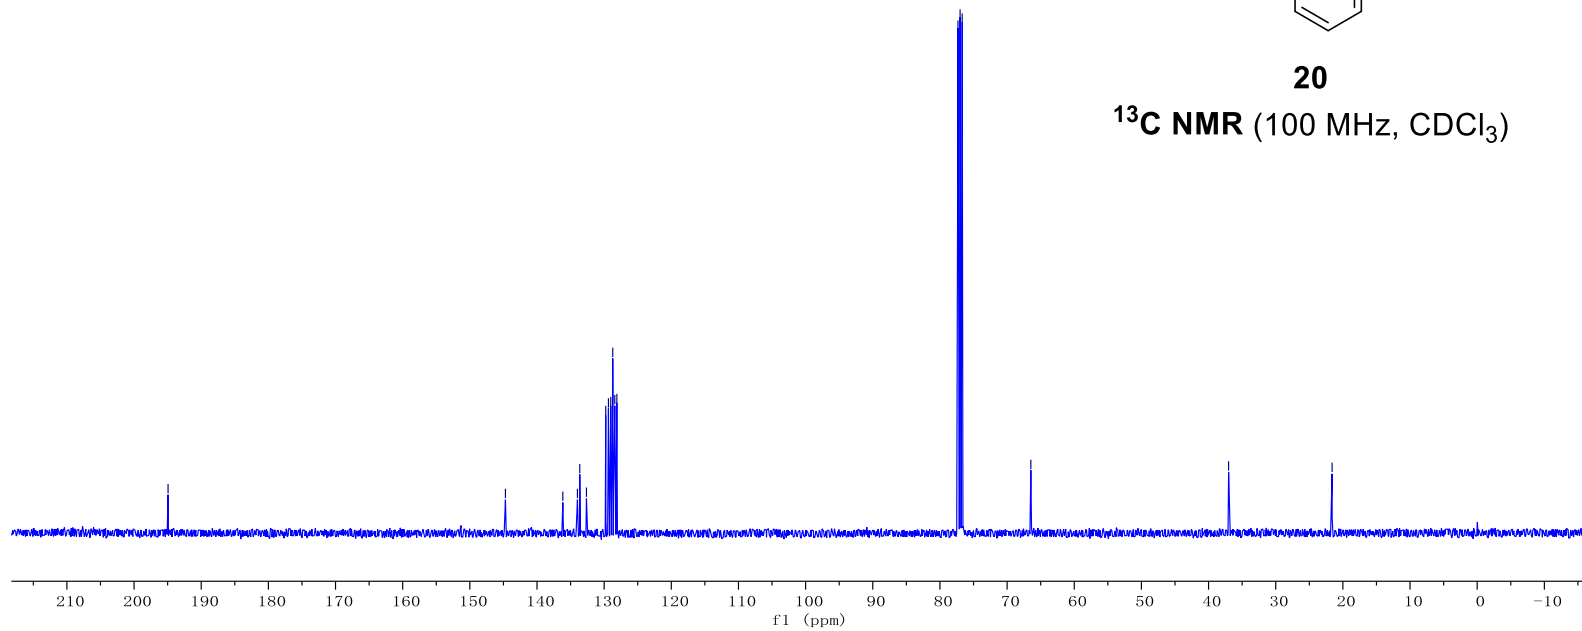

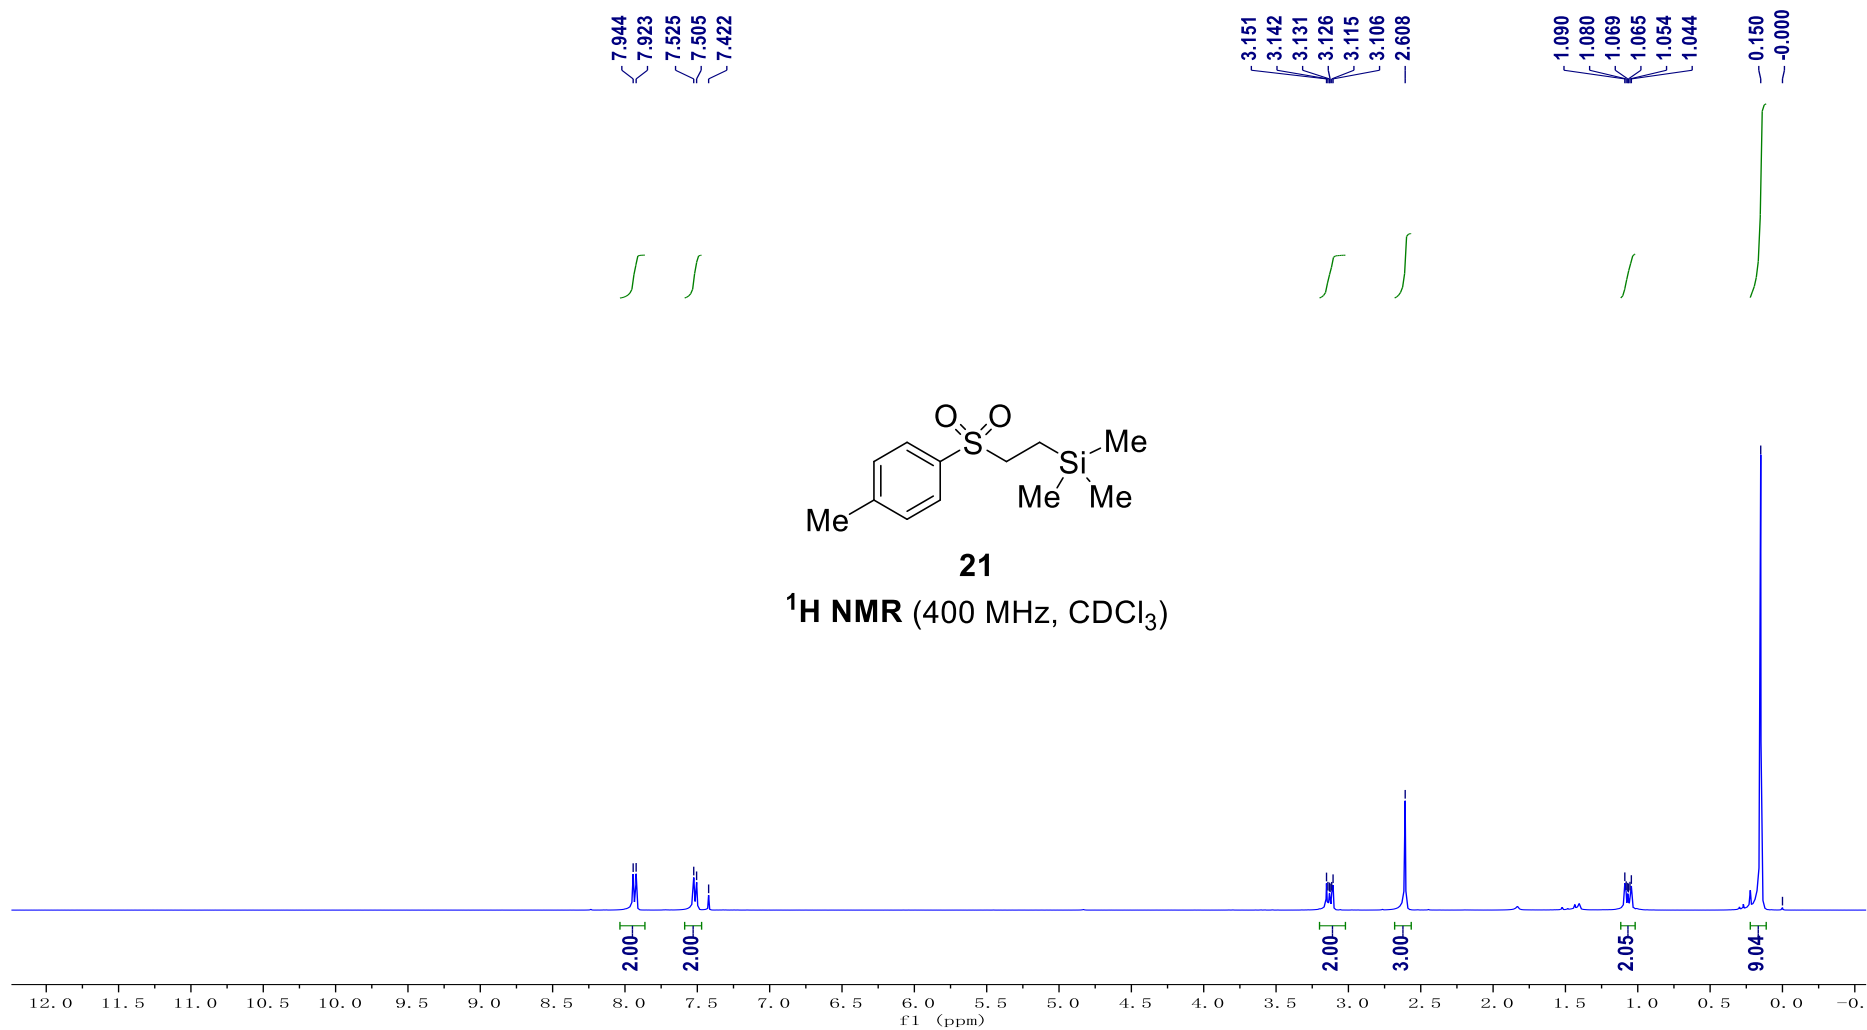

— 144.443

— 135.706

— 129.795

— 128.216

77.318

77.000

76.682

— 52.746

— 21.580

— 9.145

— -2.085

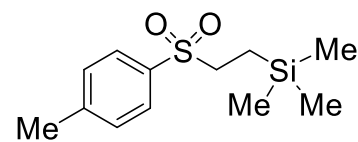

**21**

**<sup>13</sup>C NMR (100 MHz, CDCl<sub>3</sub>)**

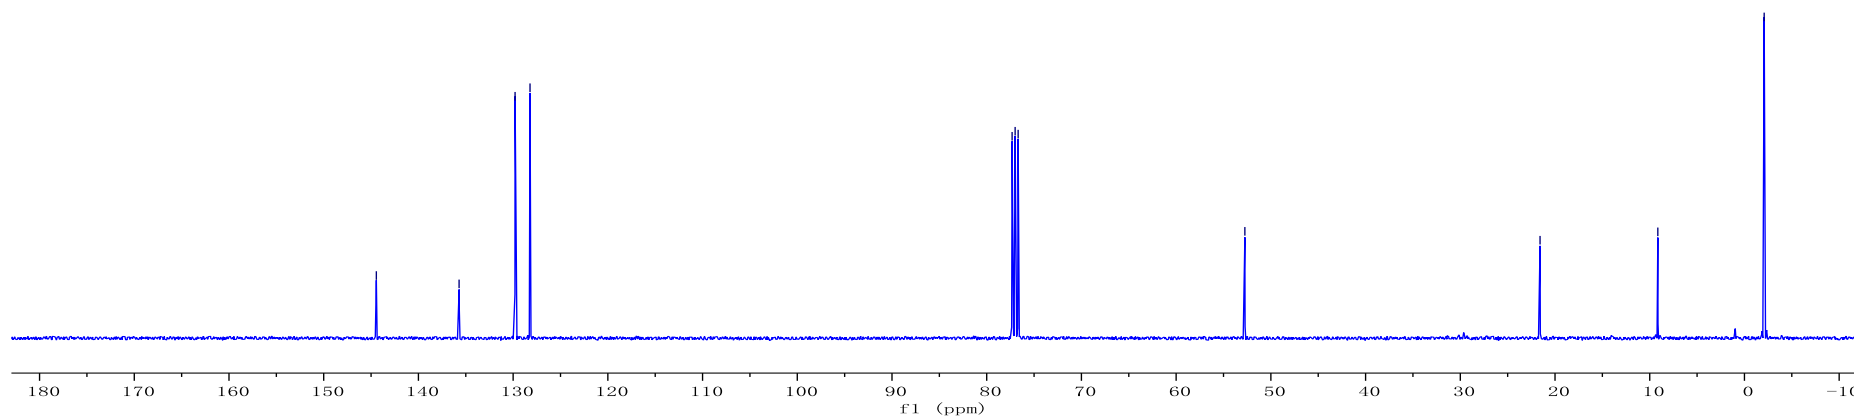

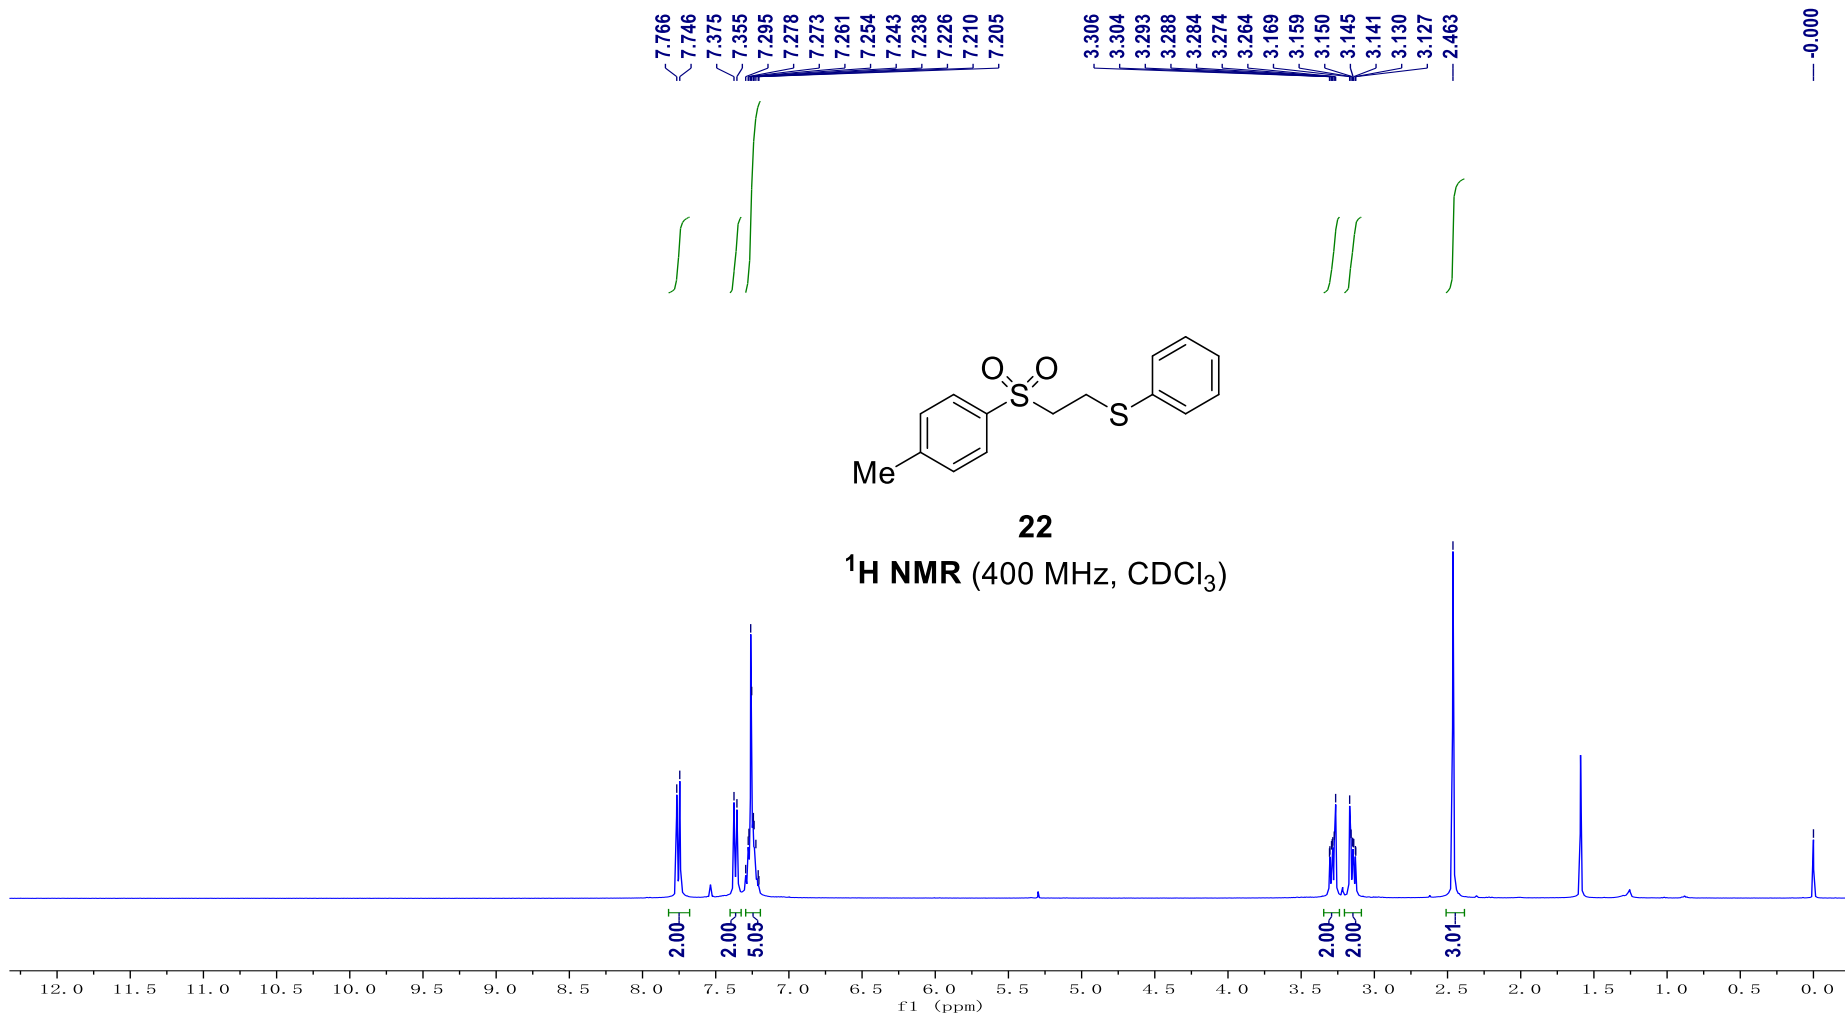

— 145.086  
135.606  
133.475  
130.208  
130.036  
129.280  
128.105  
127.181

77.318  
77.000  
76.683

— 55.782

— 26.434  
— 21.644

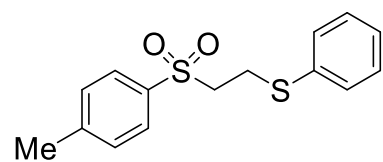

**22**

**<sup>13</sup>C NMR (100 MHz, CDCl<sub>3</sub>)**

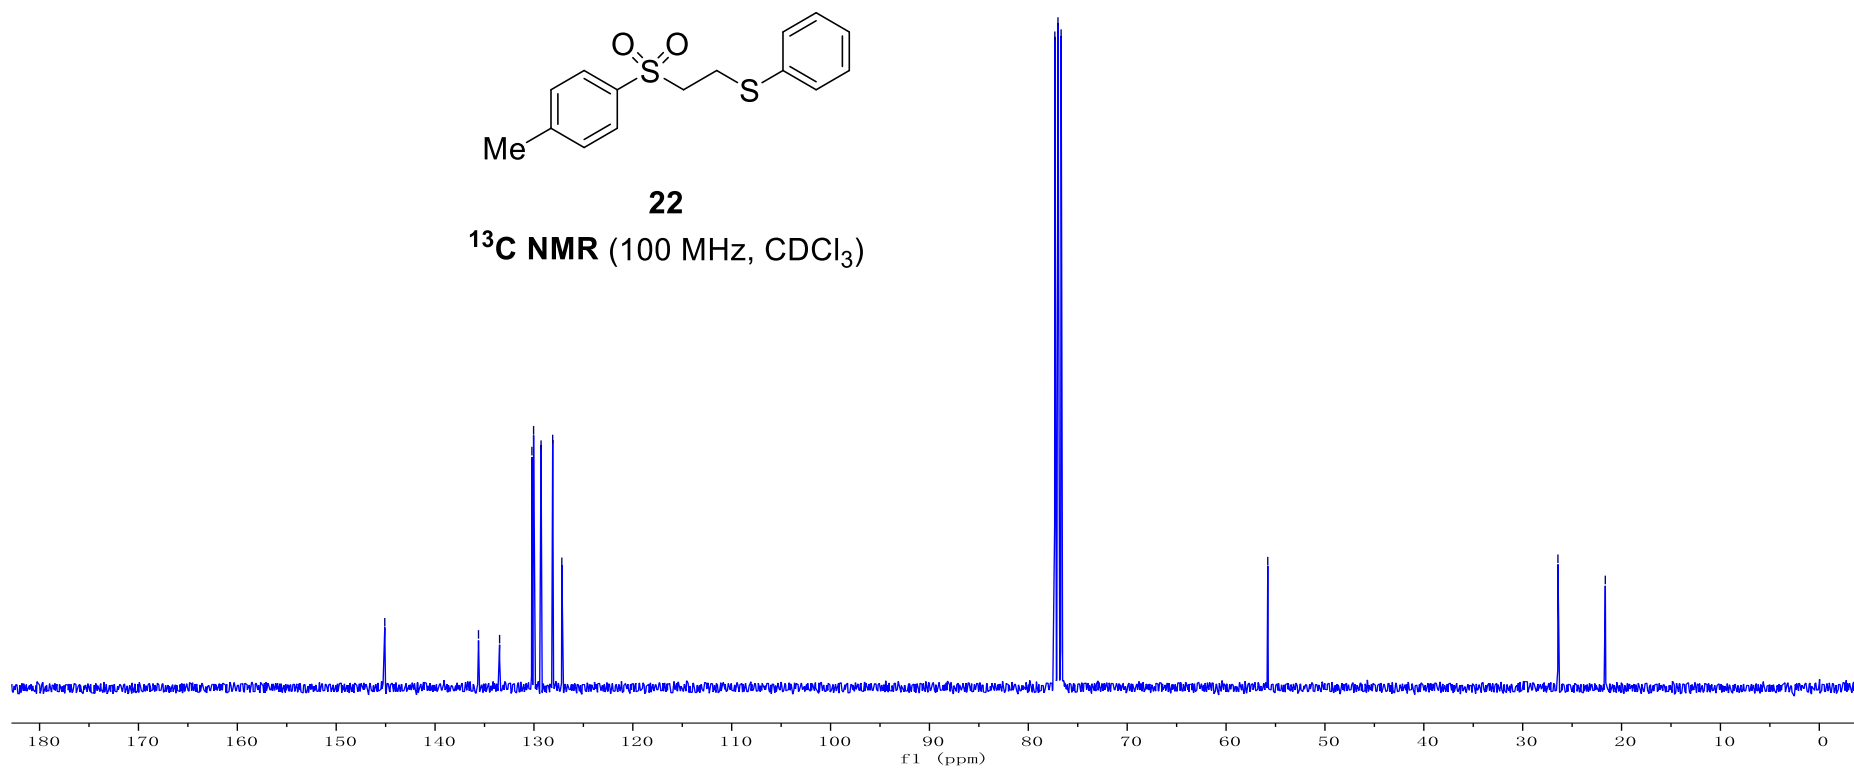

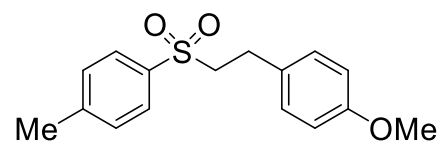

**23**

<sup>1</sup>H NMR (300 MHz, CDCl<sub>3</sub>)

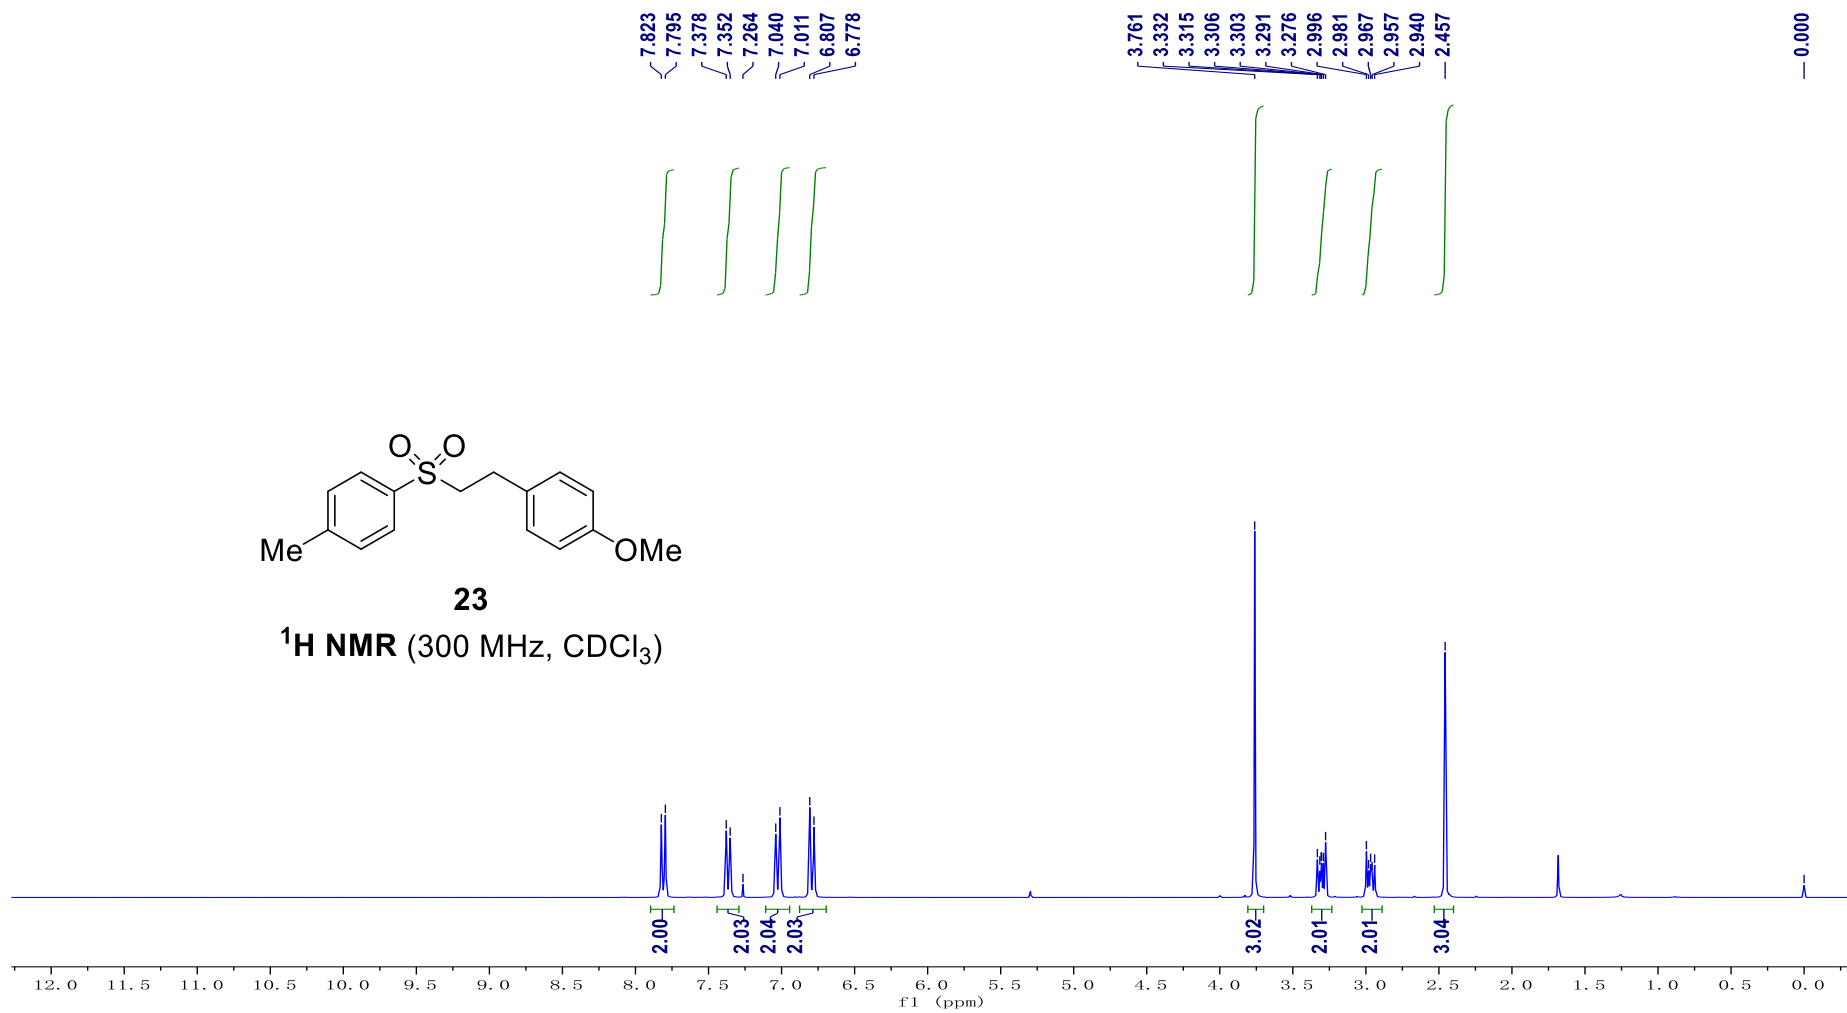

— 158.414

— 144.717

— 135.989

129.906

129.427

129.242

128.051

— 114.110

77.424

77.000

76.576

— 57.794

— 55.217

— 27.935

— 21.605

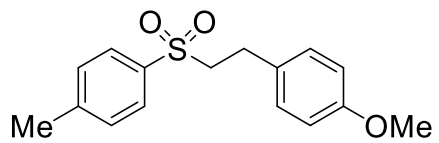

**23**

**<sup>13</sup>C NMR (75 MHz, CDCl<sub>3</sub>)**

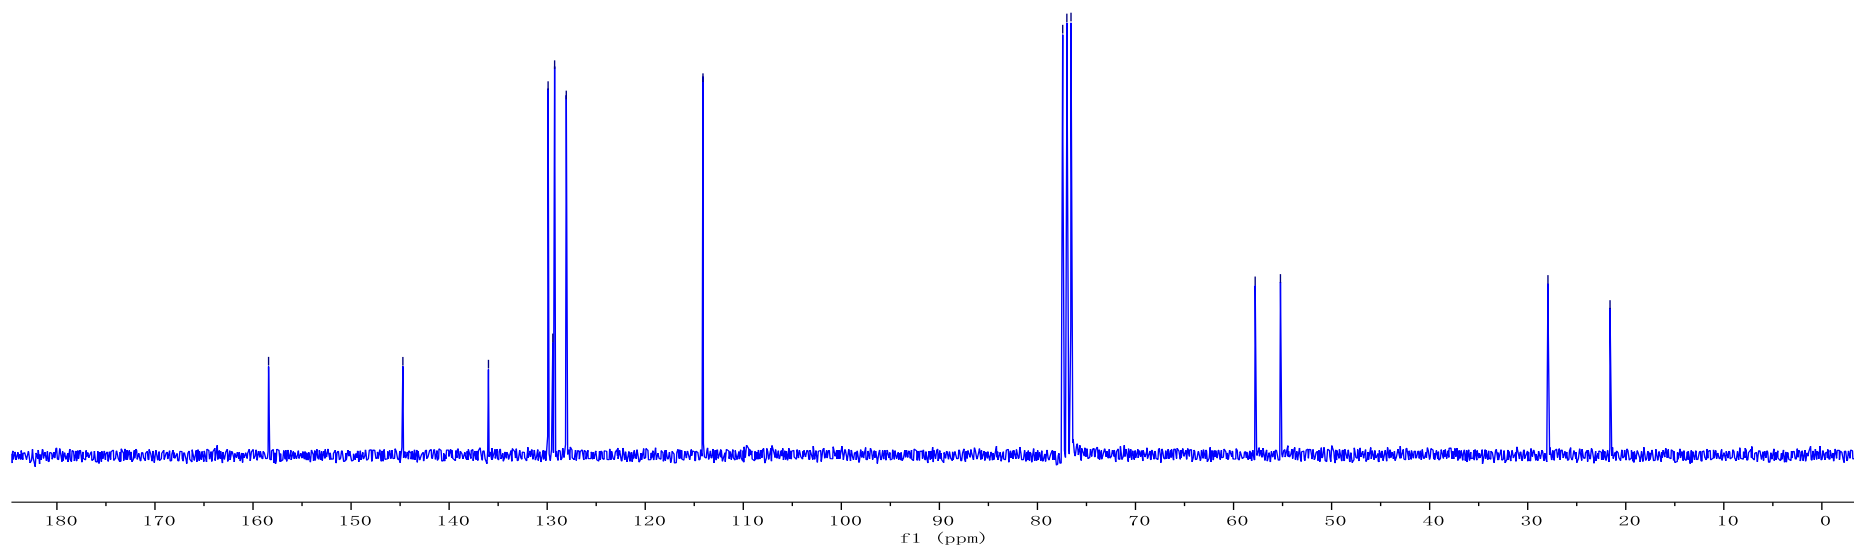



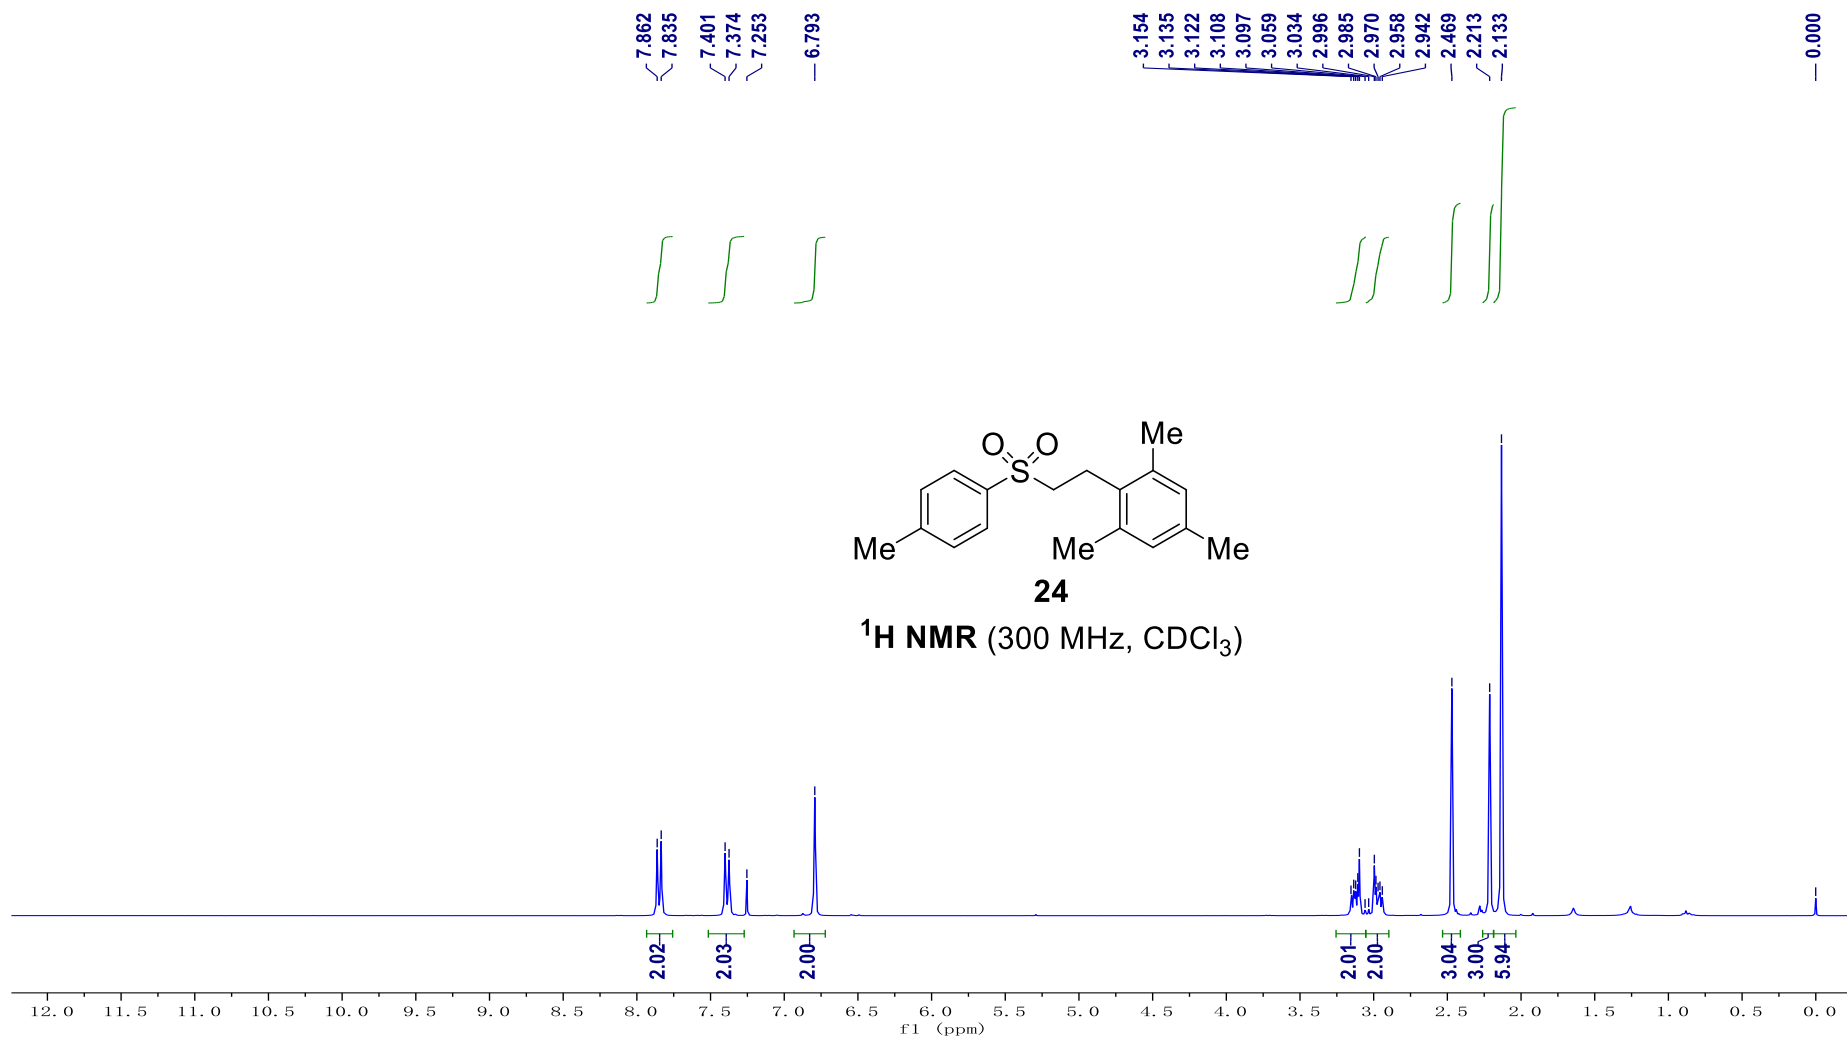

— 144.737  
136.265  
135.997  
135.798  
130.997  
129.910  
129.135  
128.055

77.424  
77.000  
76.577

— 54.687

22.502  
21.618  
20.721  
19.301

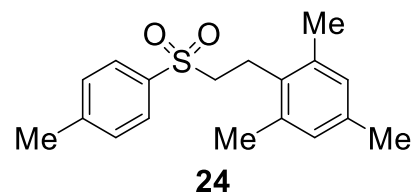

<sup>13</sup>C NMR (75 MHz, CDCl<sub>3</sub>)

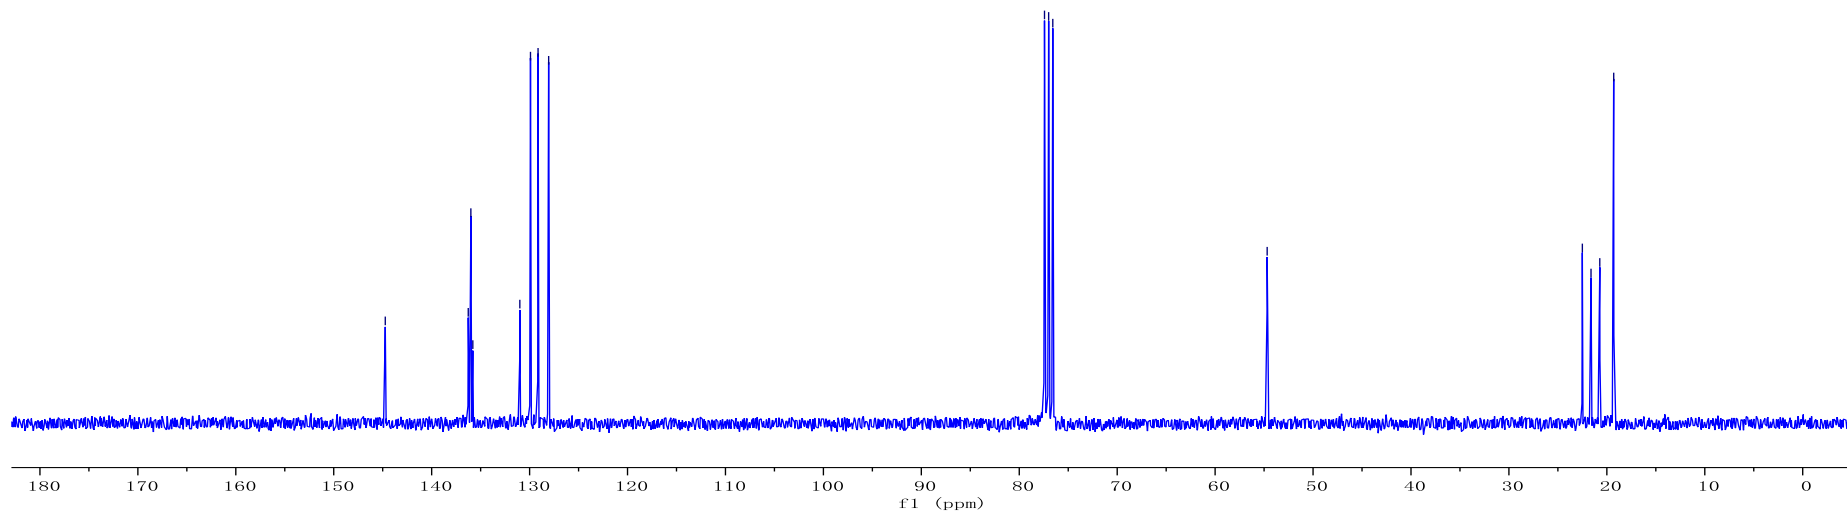

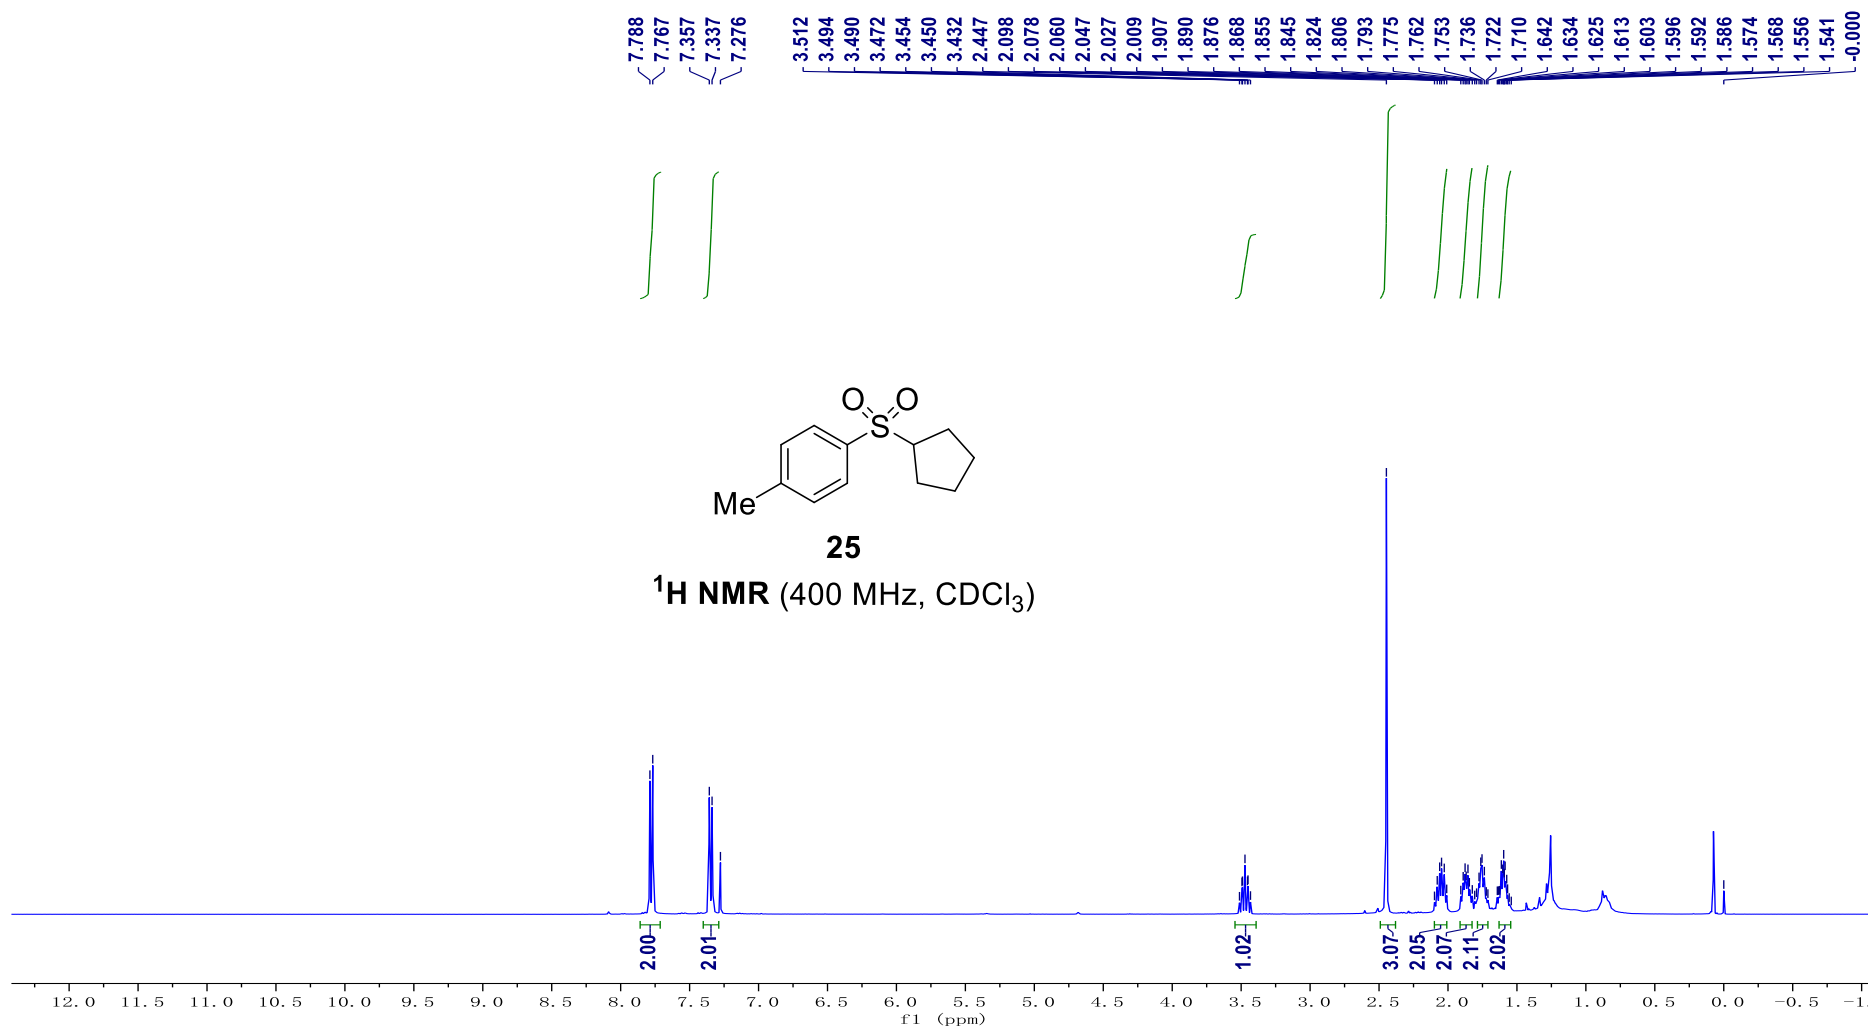

— 144.315

— 135.951

— 129.730

— 128.436

— 77.424

— 77.000

— 76.577

— 64.212

— 27.220

— 25.810

— 21.578

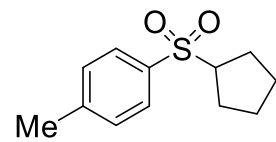

**25**

**<sup>13</sup>C NMR (75 MHz, CDCl<sub>3</sub>)**

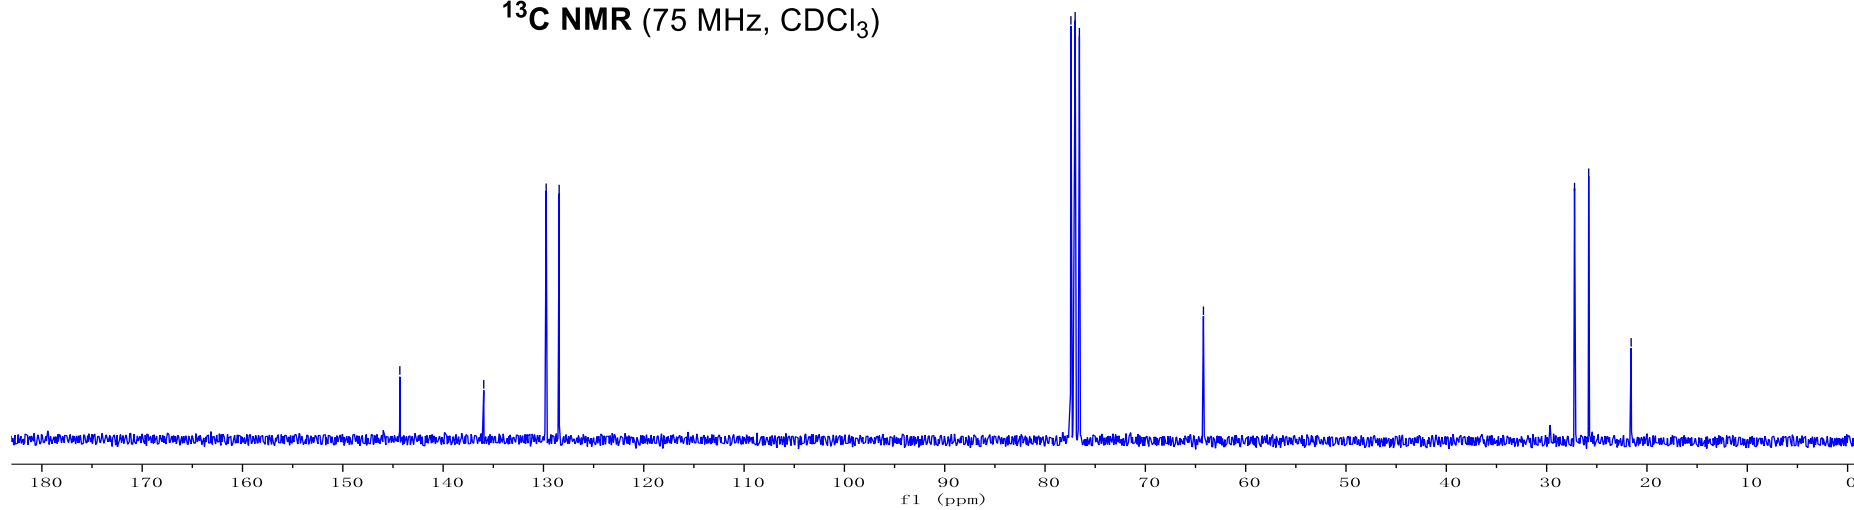

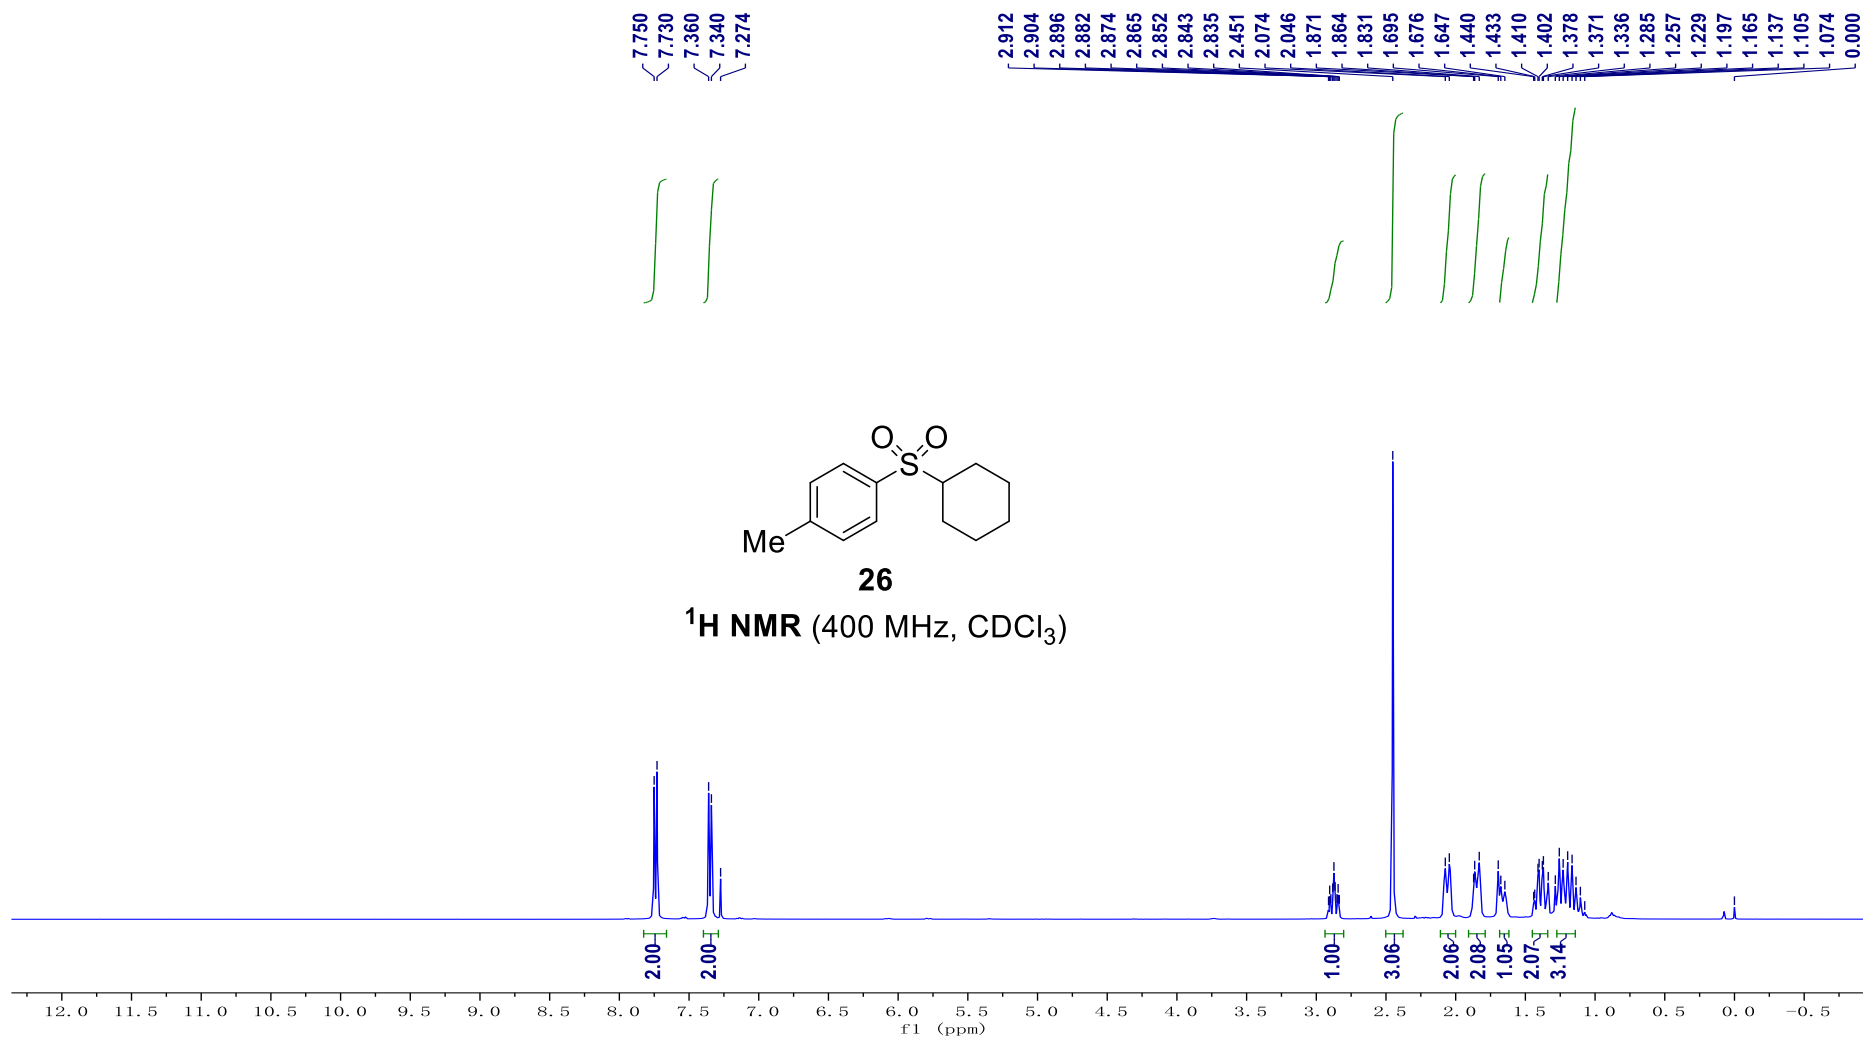

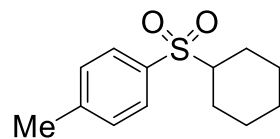

**26**

<sup>13</sup>C NMR (100 MHz, CDCl<sub>3</sub>)

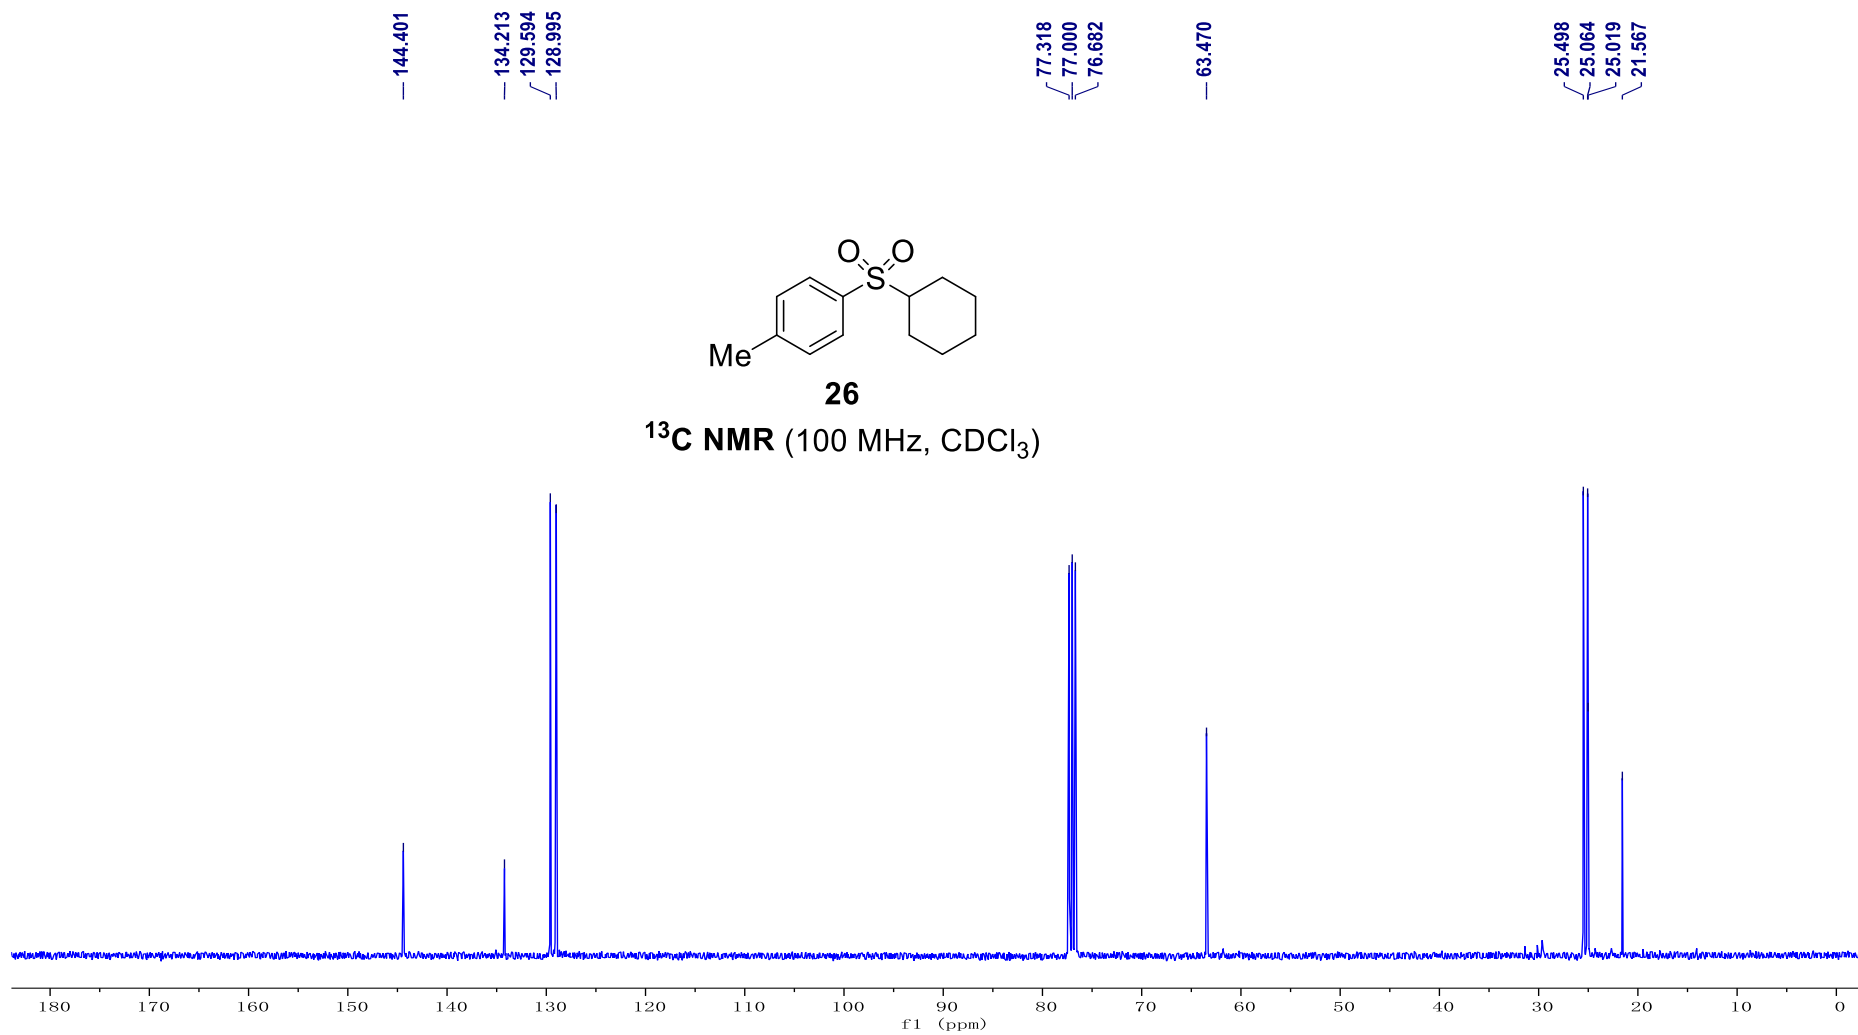

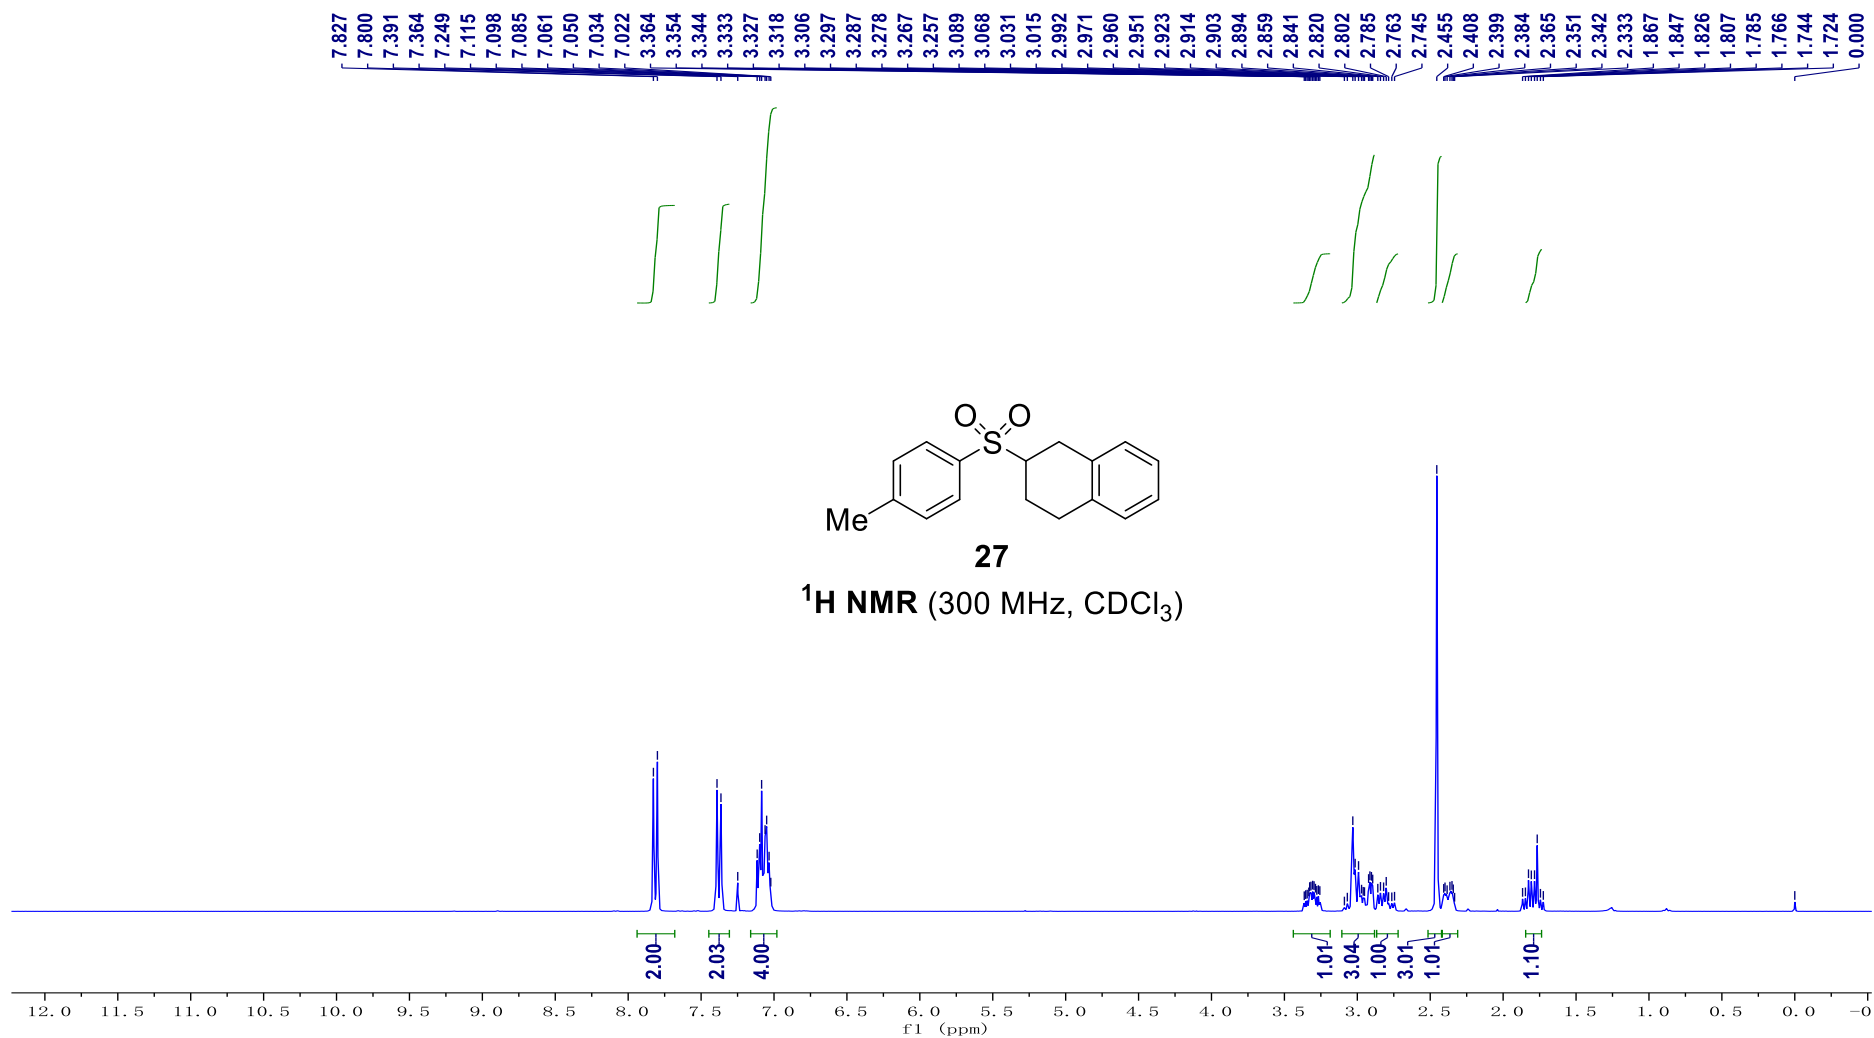

— 144.776  
134.724  
133.840  
132.840  
129.763  
128.999  
128.976  
128.645  
126.339  
126.117

77.424  
77.000  
76.576

— 60.454

28.663  
28.235  
22.600  
21.562

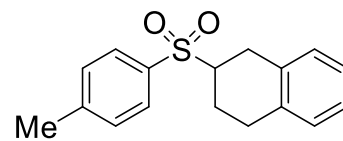

**27**

**<sup>13</sup>C NMR (75 MHz, CDCl<sub>3</sub>)**

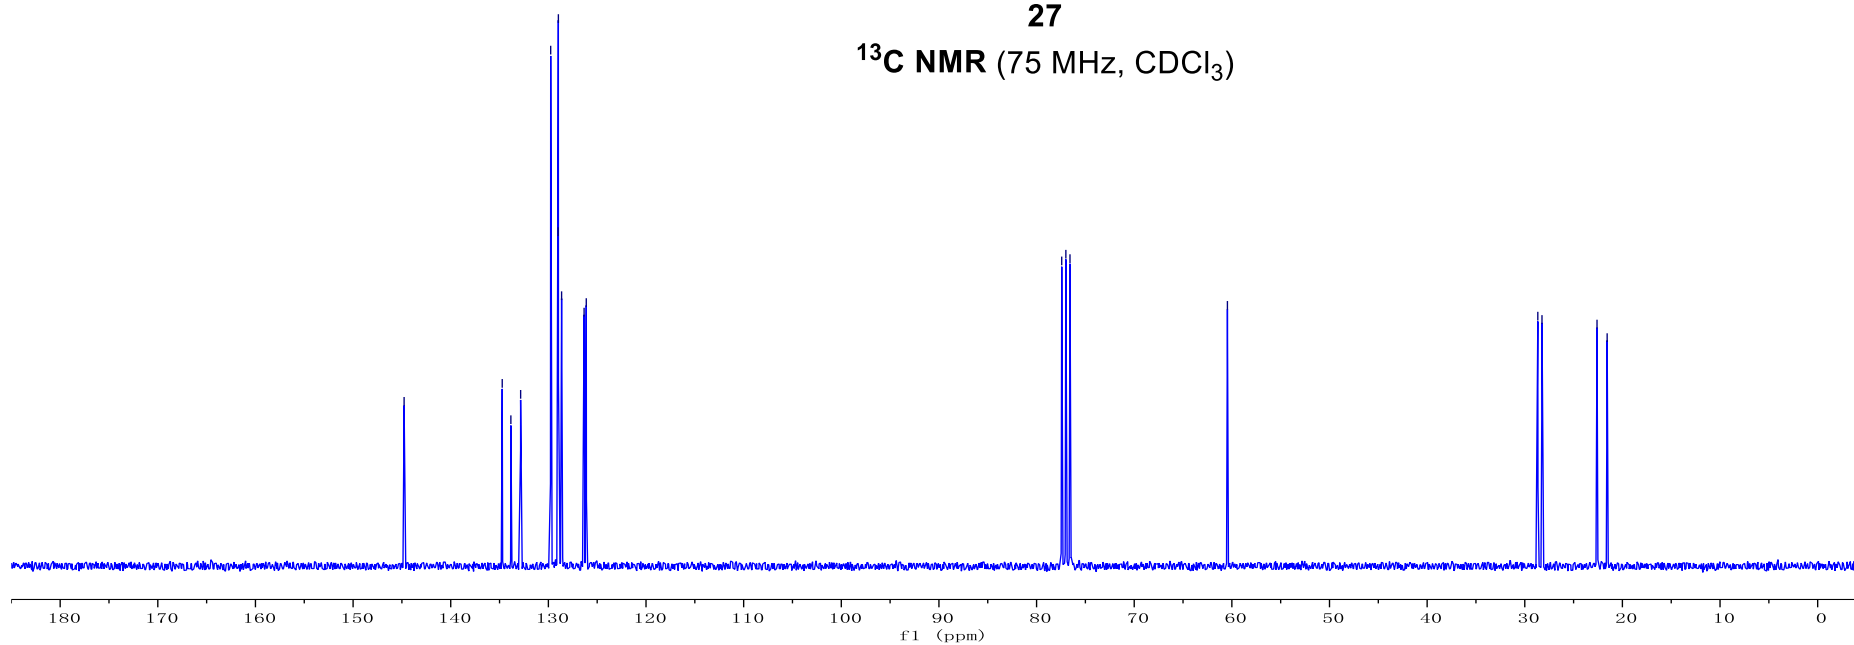



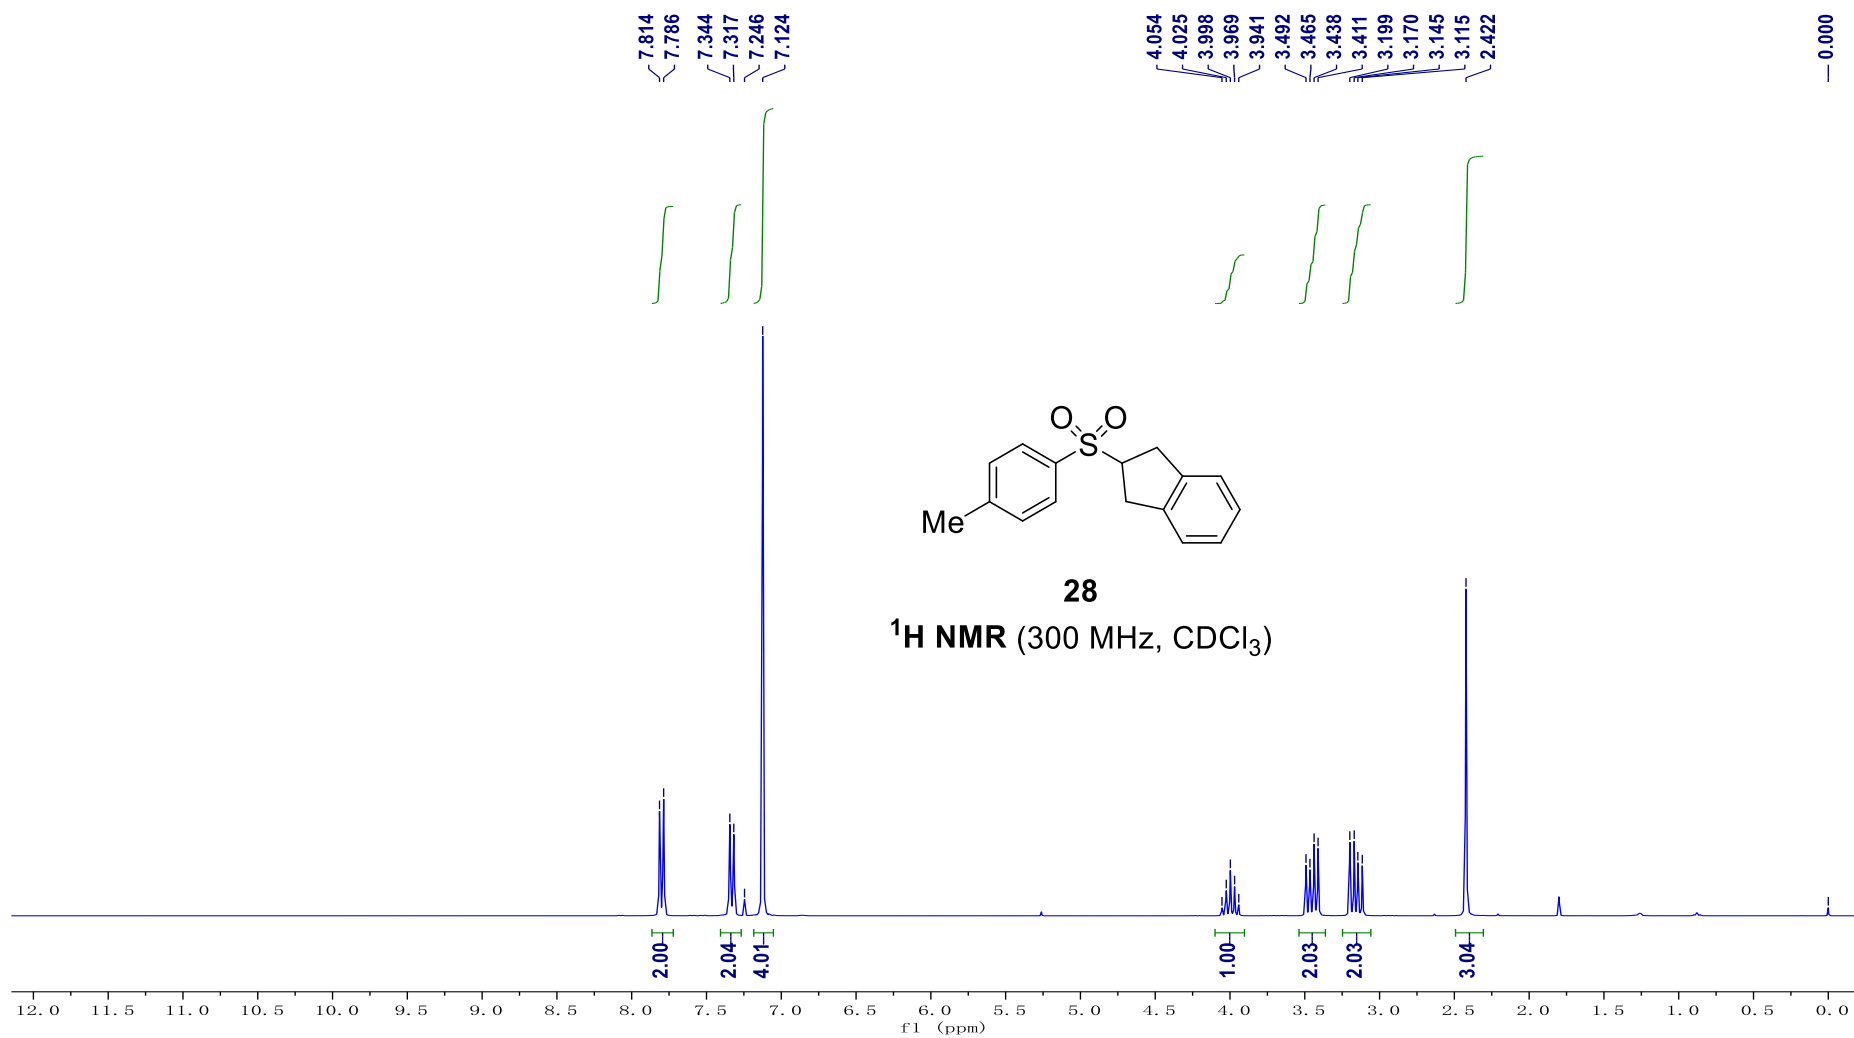

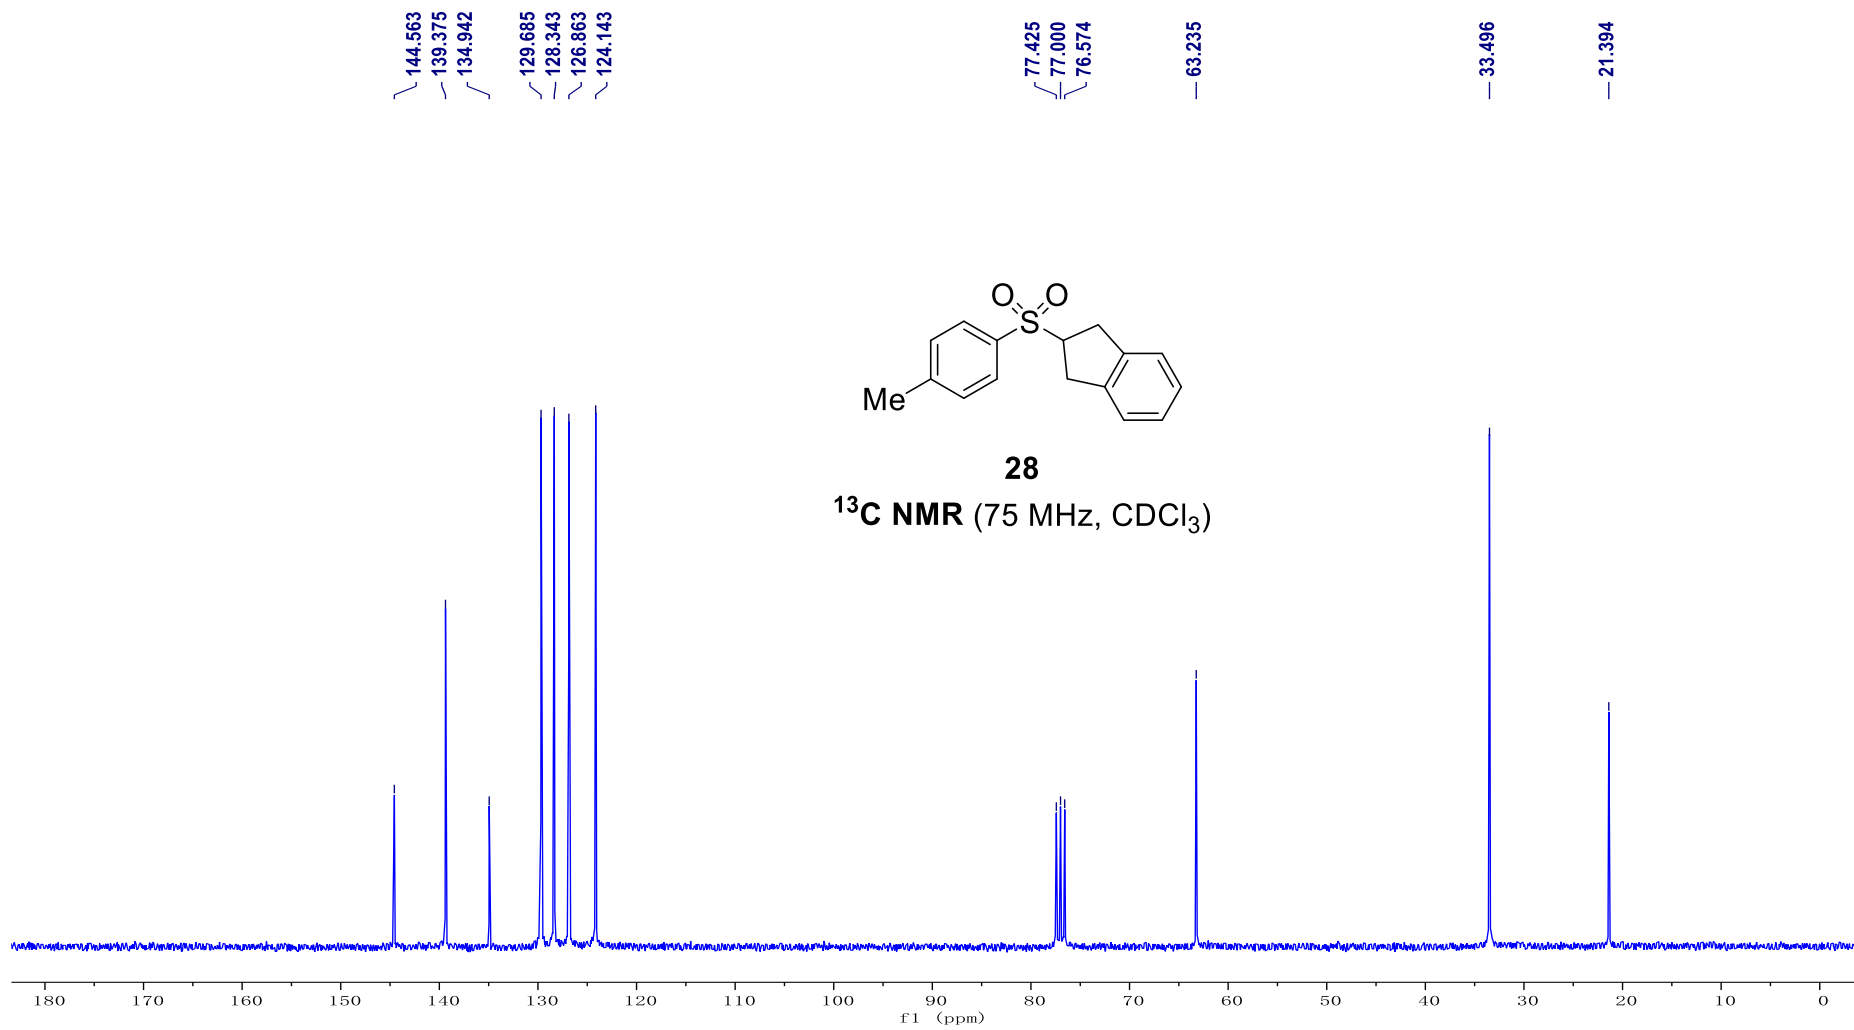

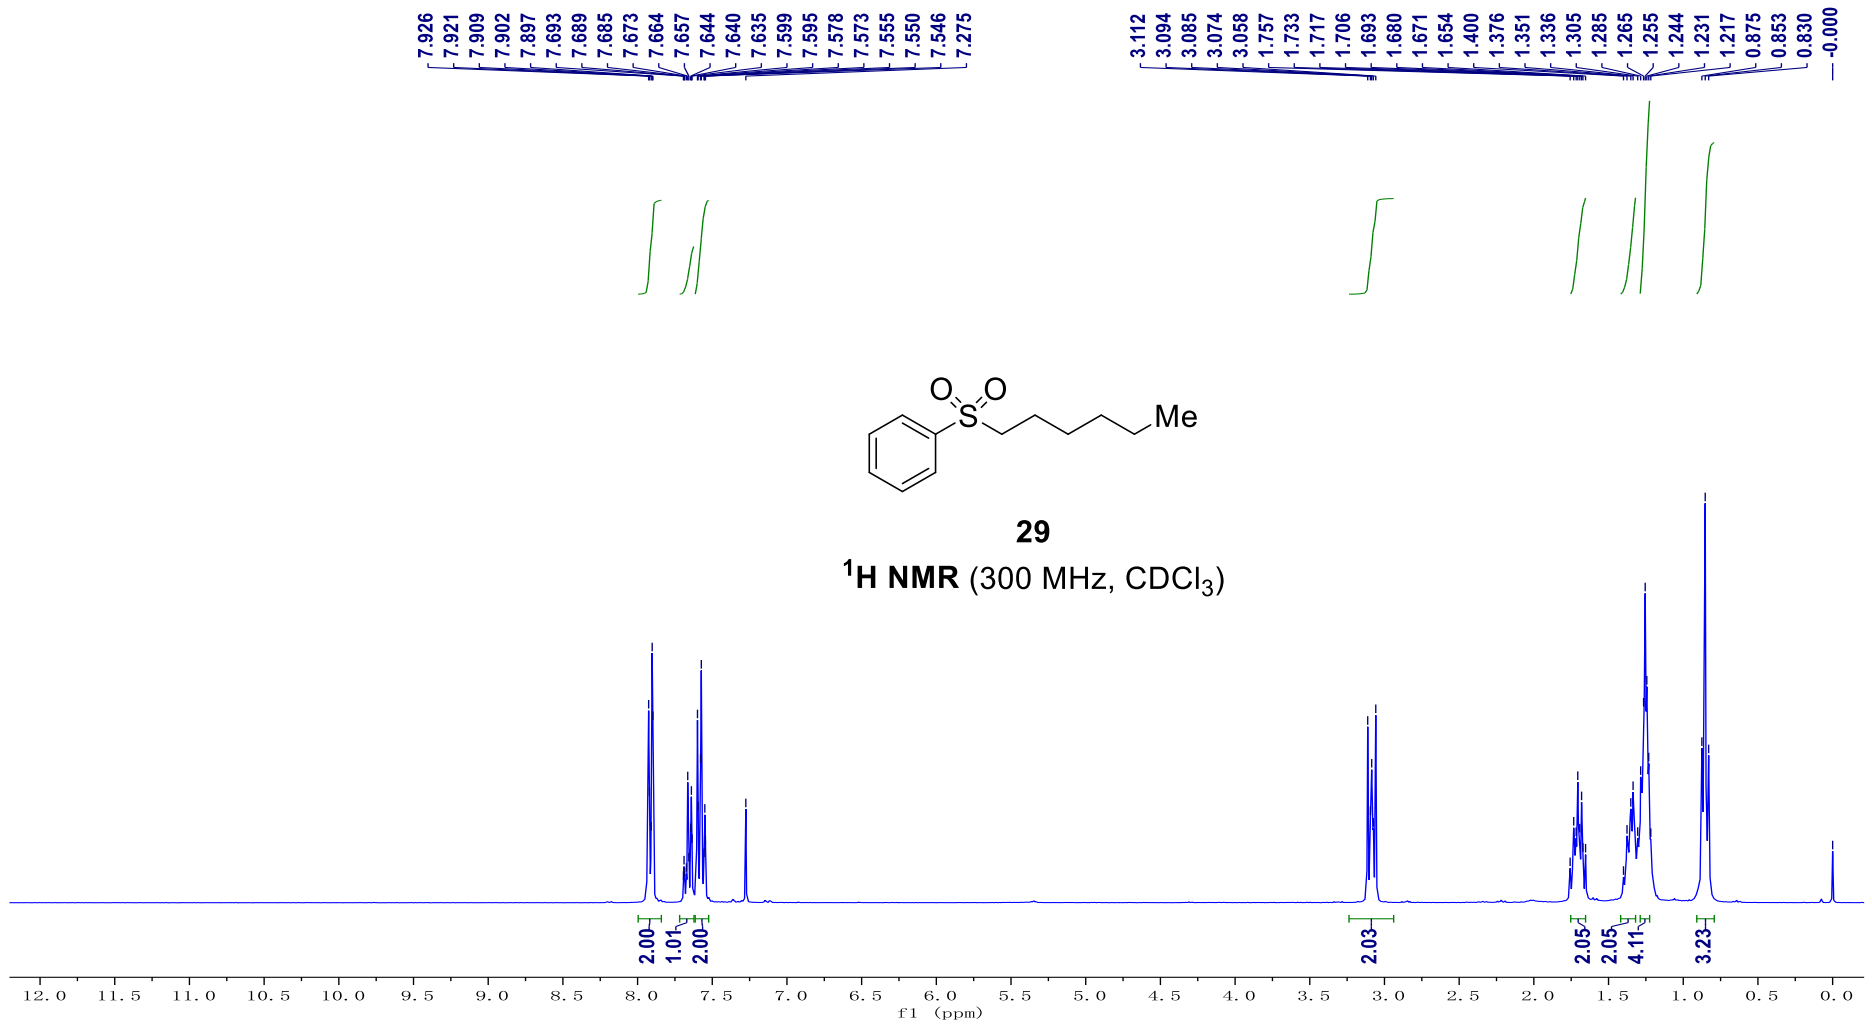

— 139.112  
— 133.564  
— 129.196  
— 127.983

77.424  
77.000  
76.576

— 56.249

— 31.089  
— 27.870  
— 22.532  
— 22.214  
— 13.852

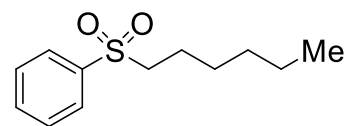

**29**

**<sup>13</sup>C NMR (75 MHz, CDCl<sub>3</sub>)**

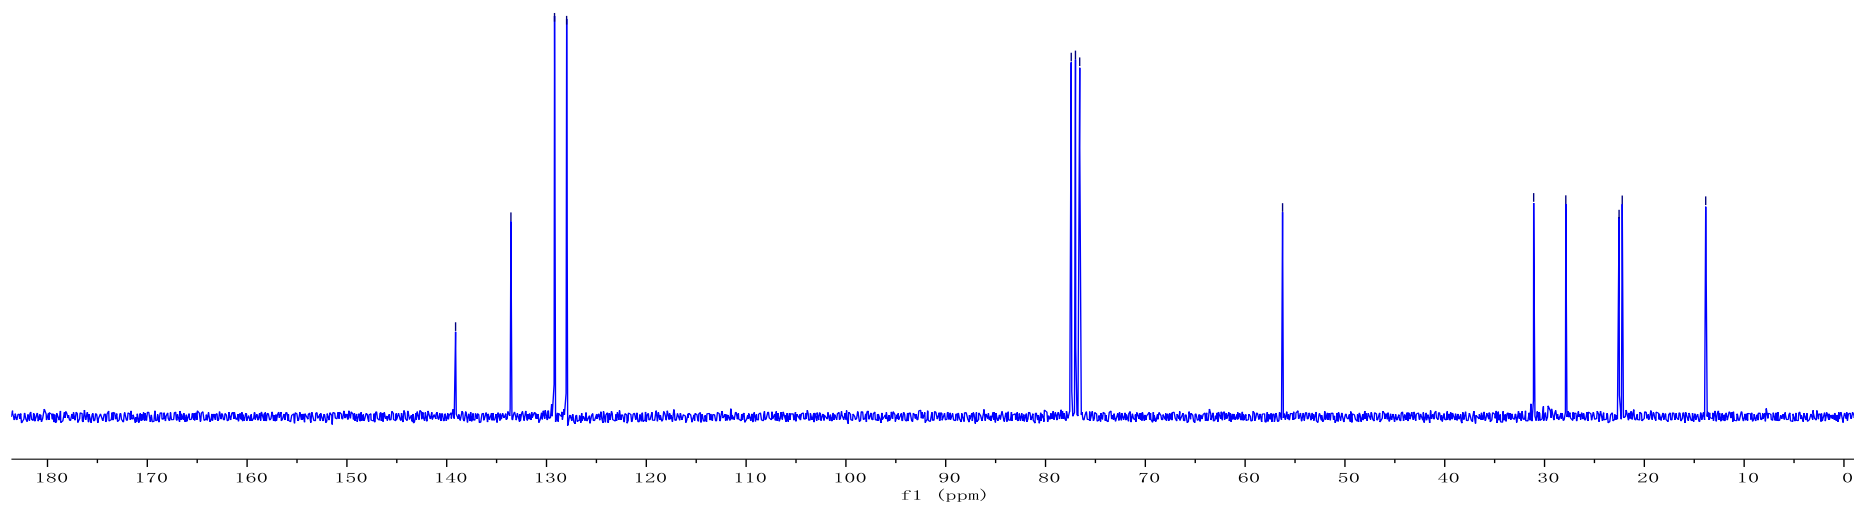

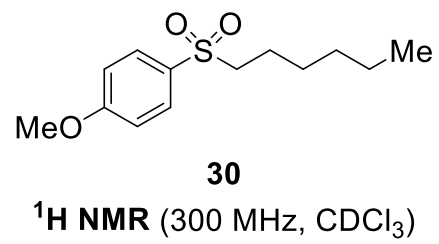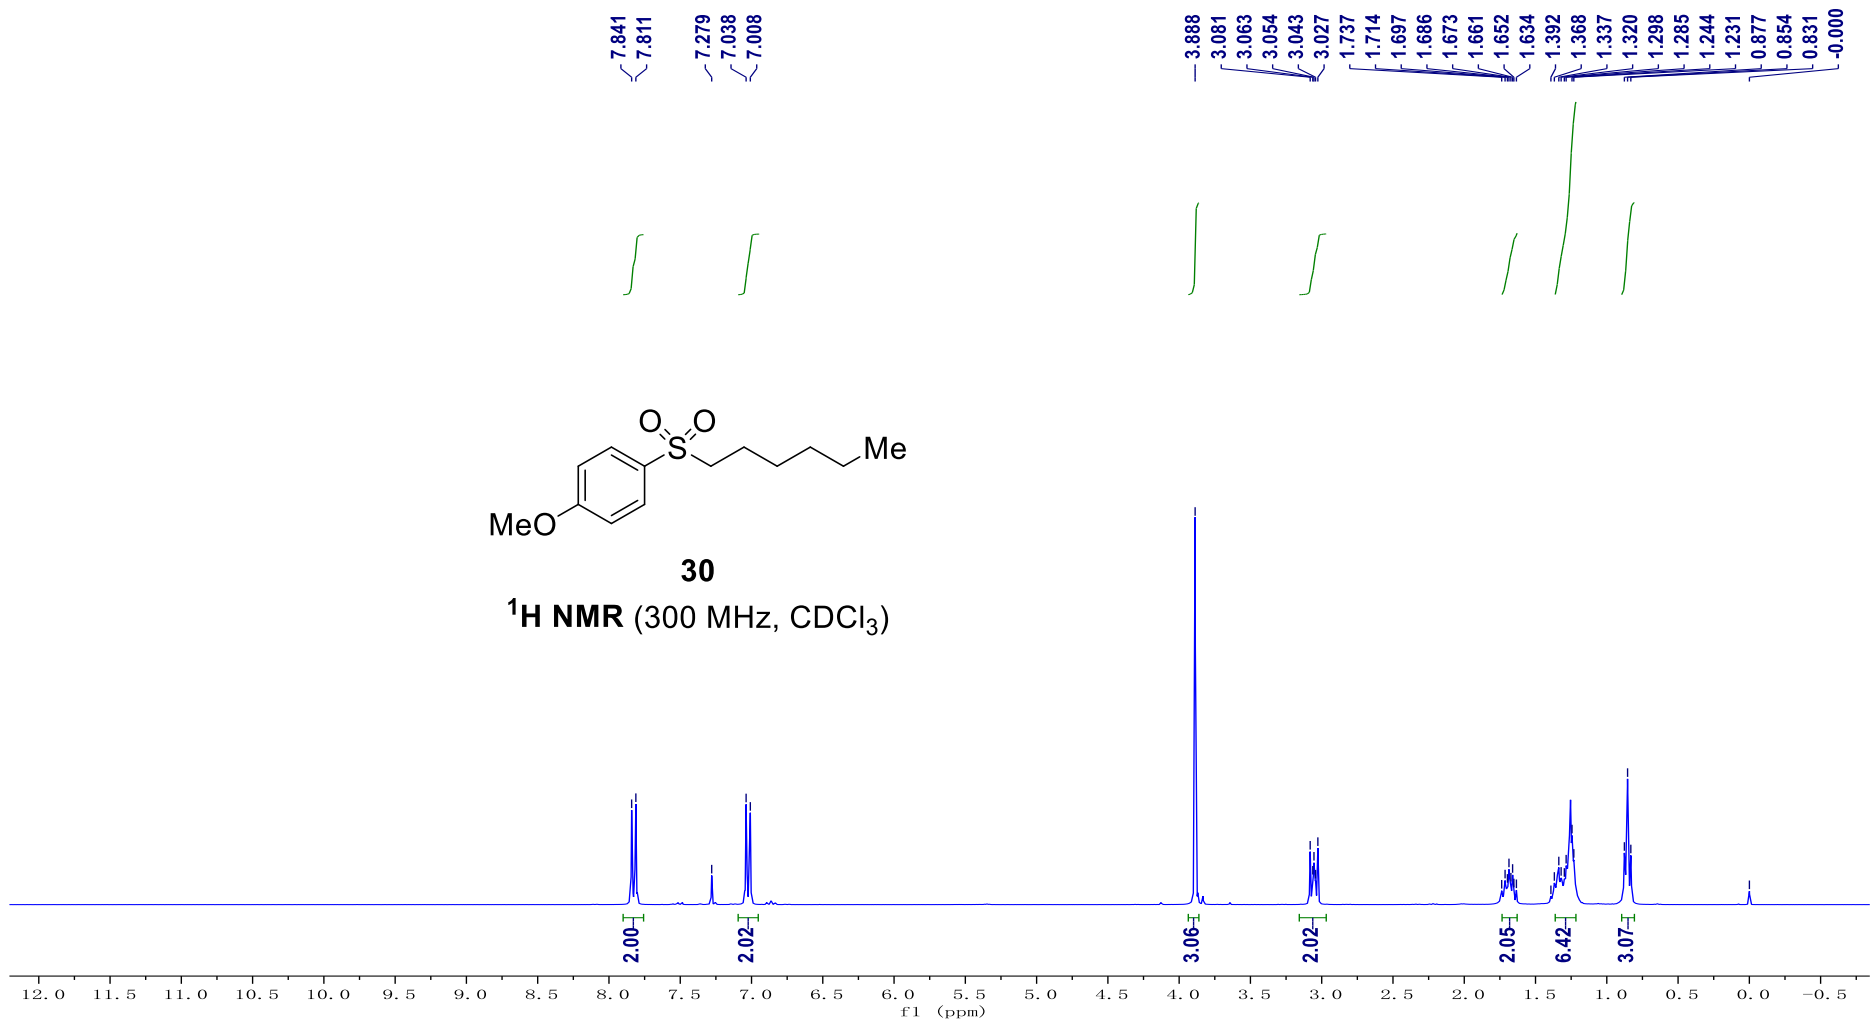

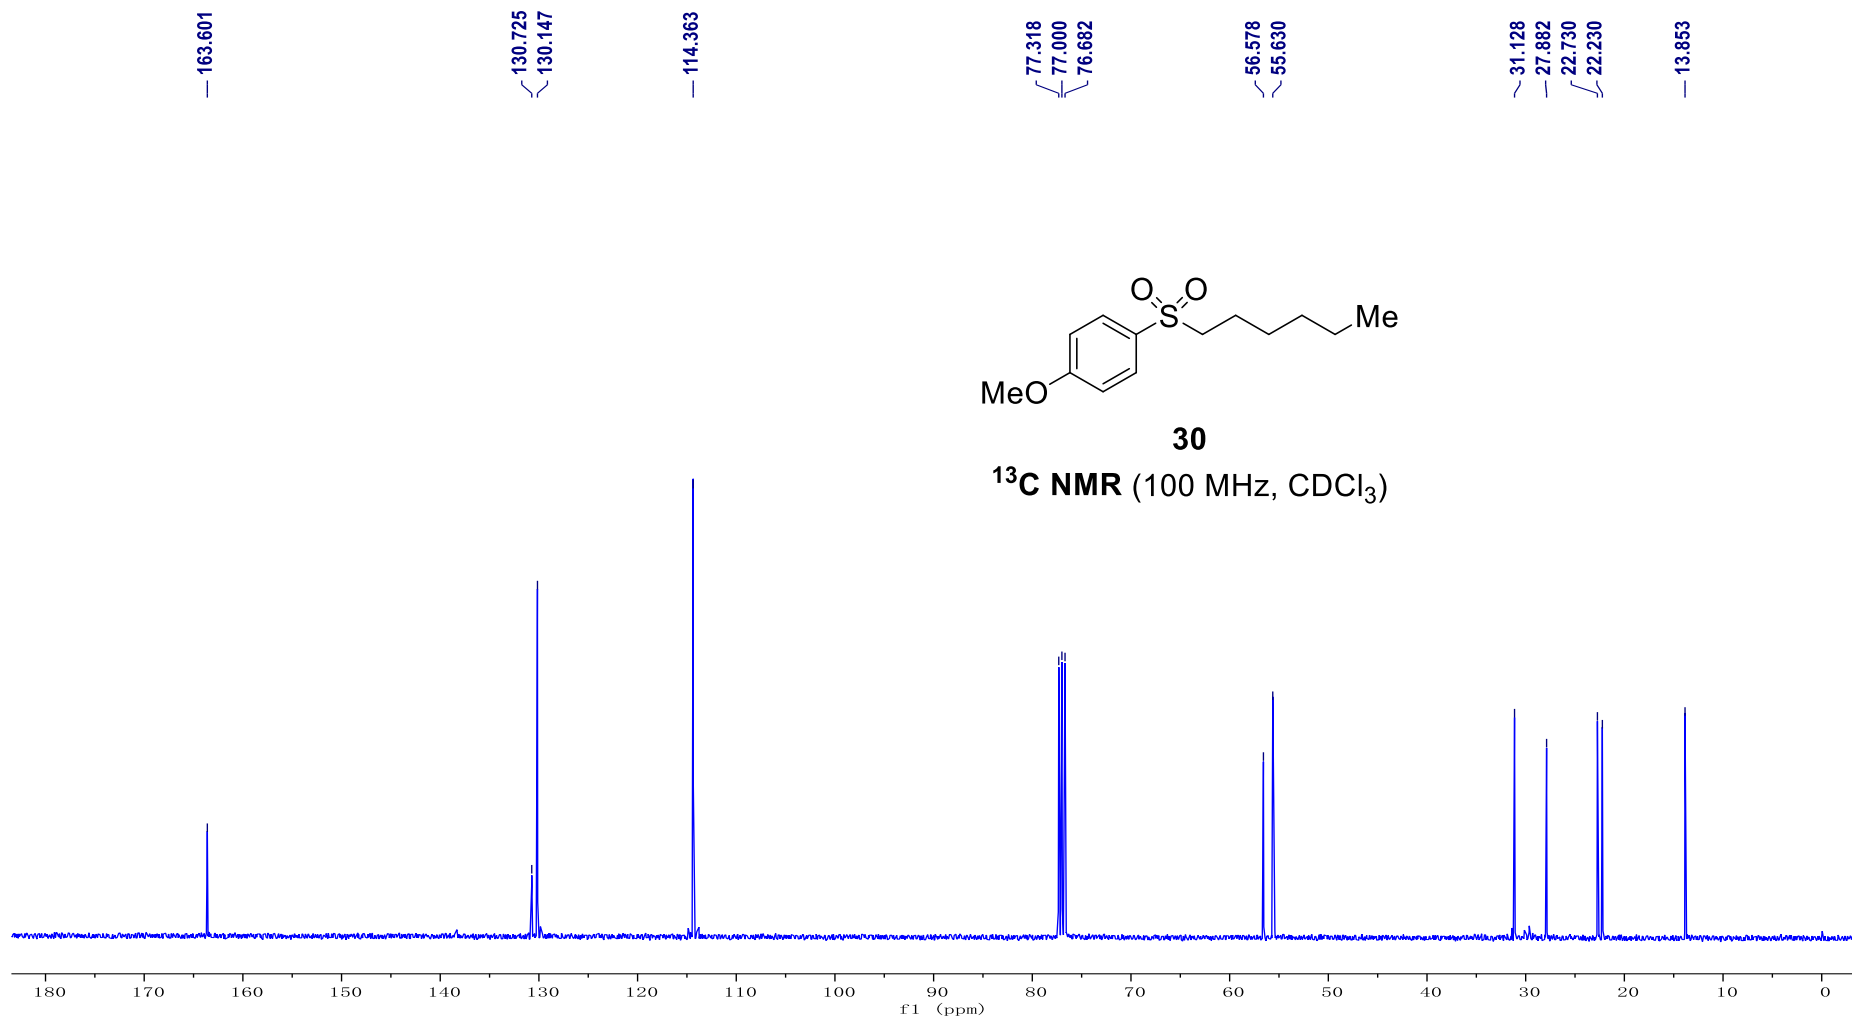

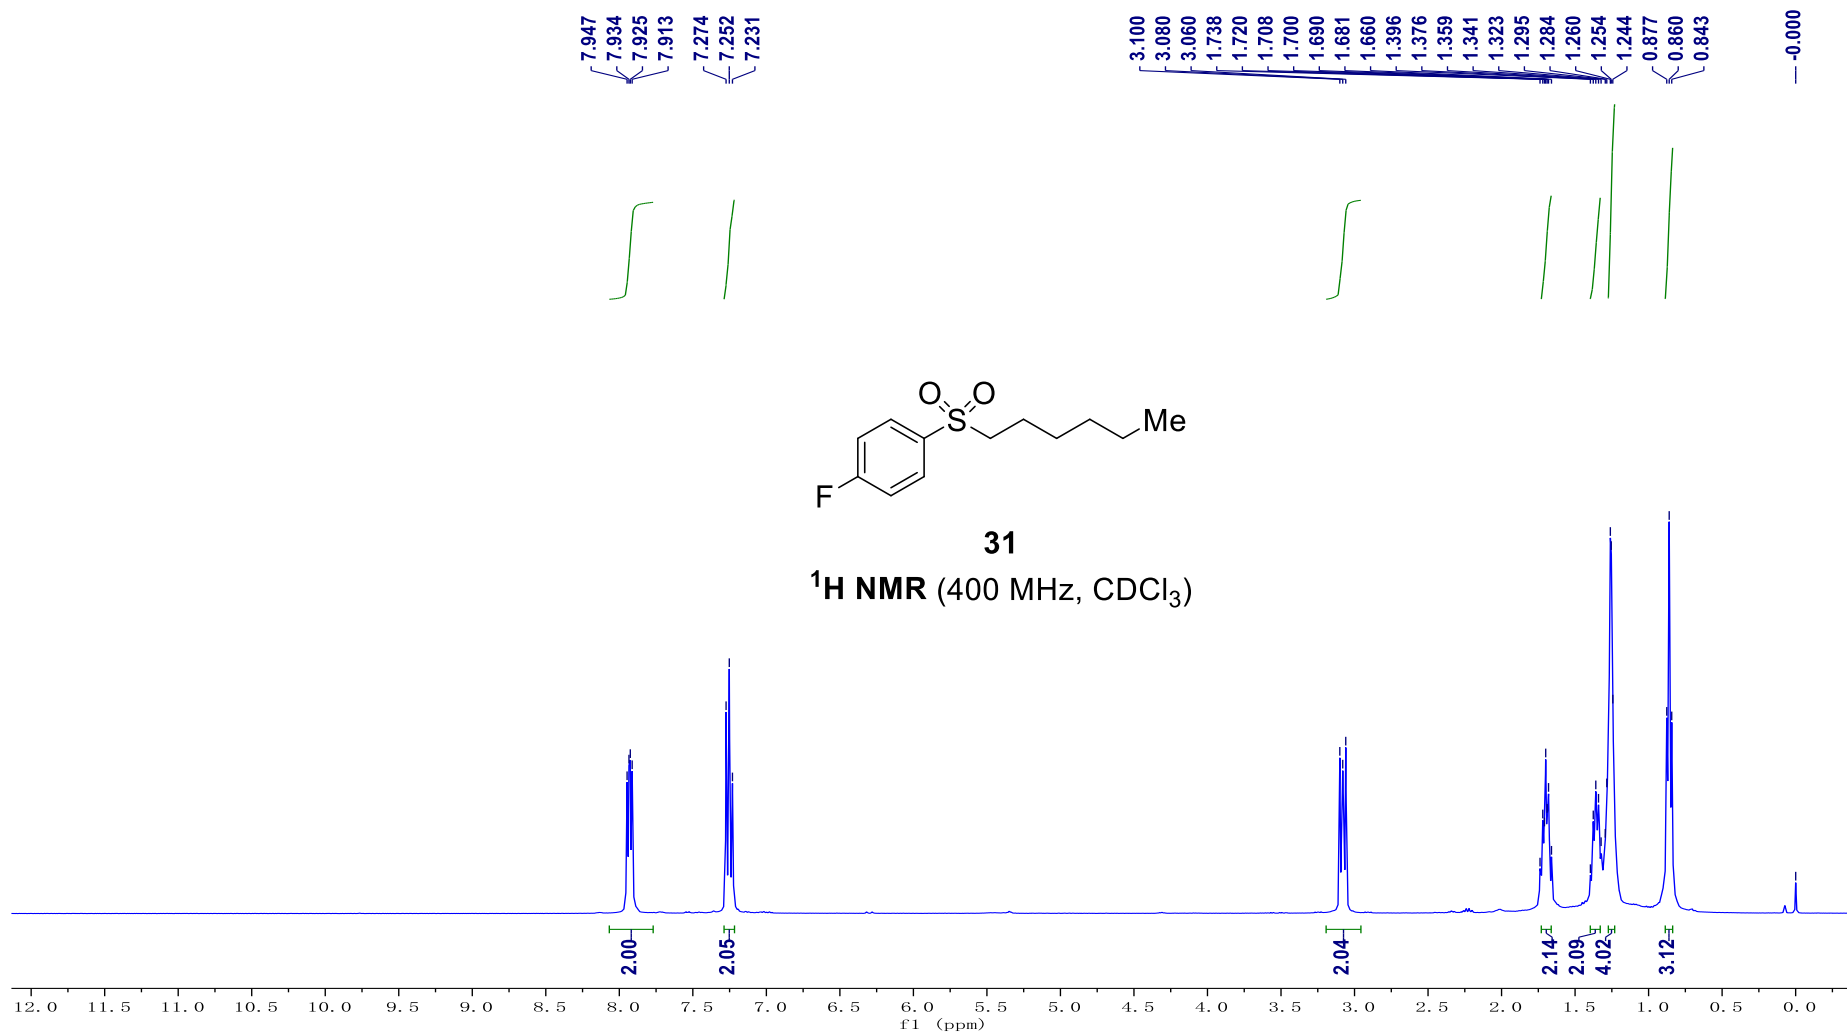

— 167.436  
— 164.043

135.212  
135.168  
130.952  
130.825

116.690  
116.391

77.423  
77.000  
76.576

— 56.440

— 31.102  
— 27.864  
22.616  
22.231

— 13.861

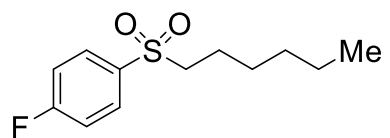

**31**

<sup>13</sup>C NMR (75 MHz, CDCl<sub>3</sub>)

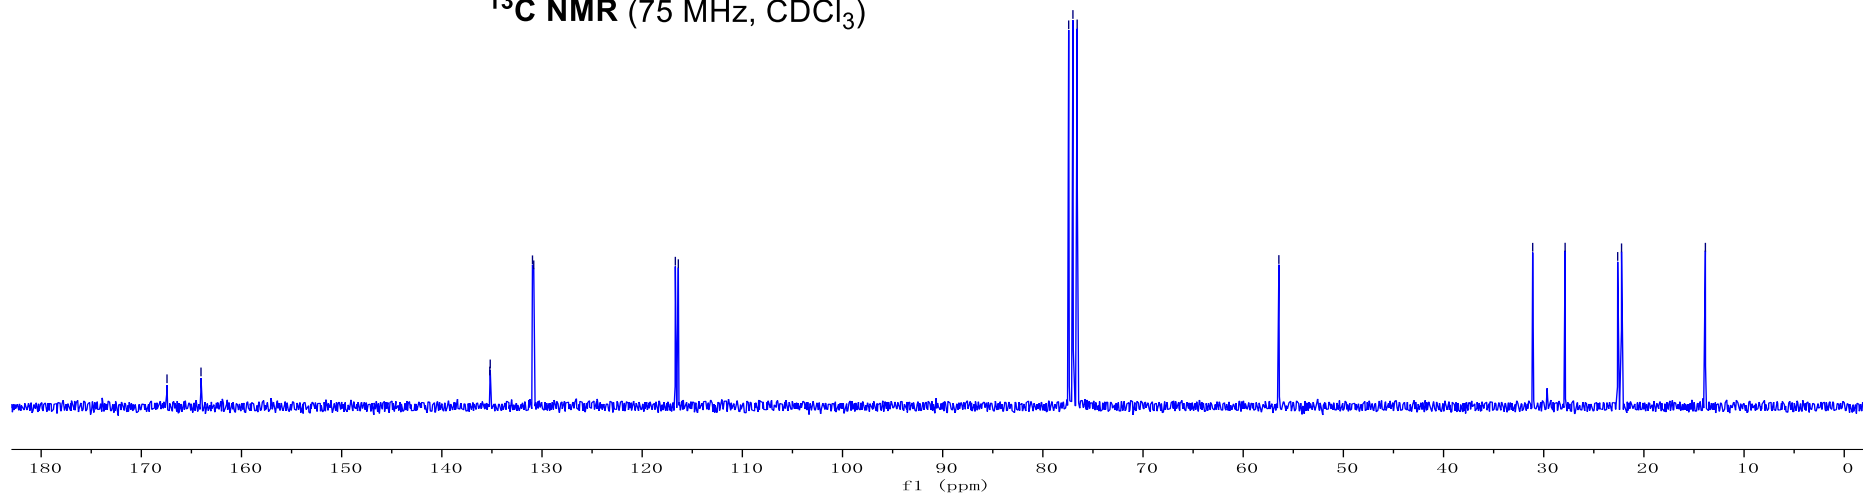



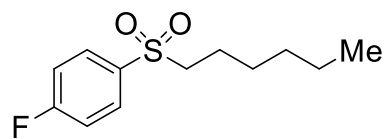

**31**

**<sup>19</sup>F NMR (282 MHz, CDCl<sub>3</sub>)**

— -103.732

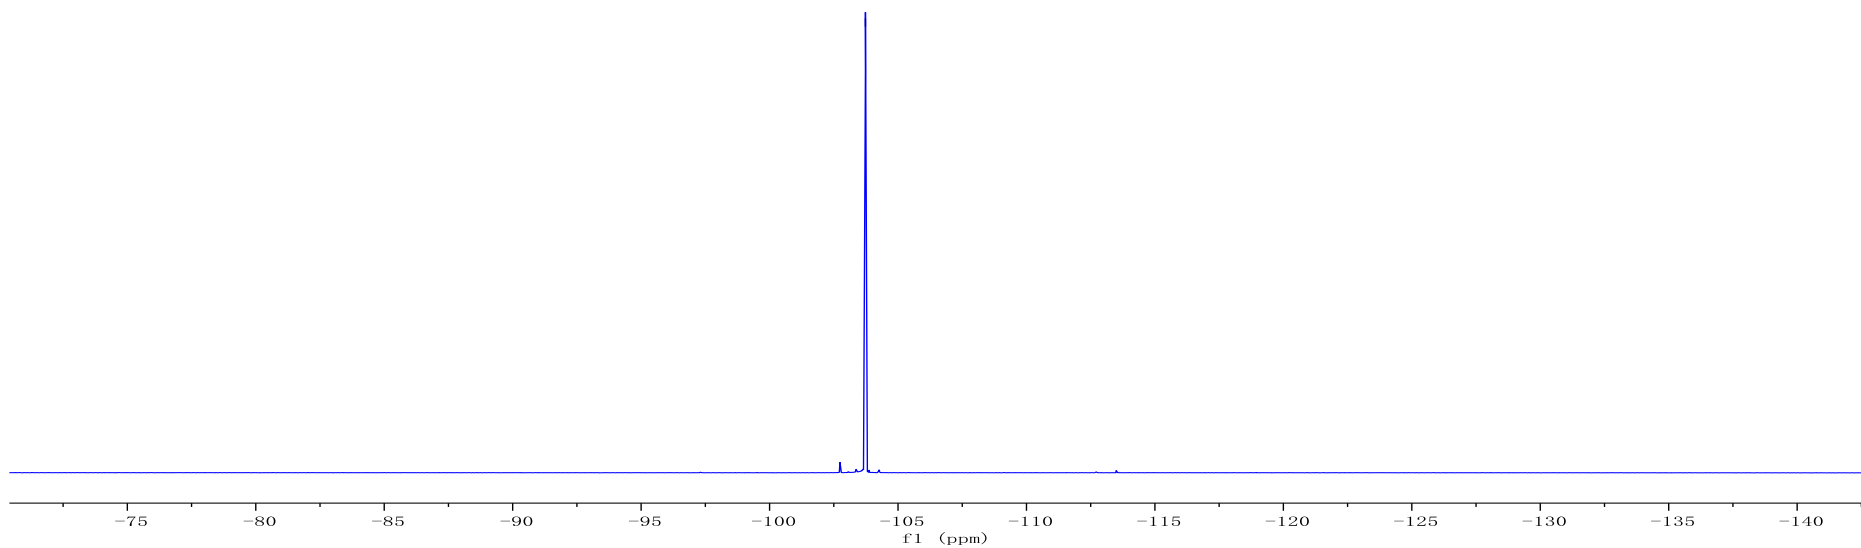

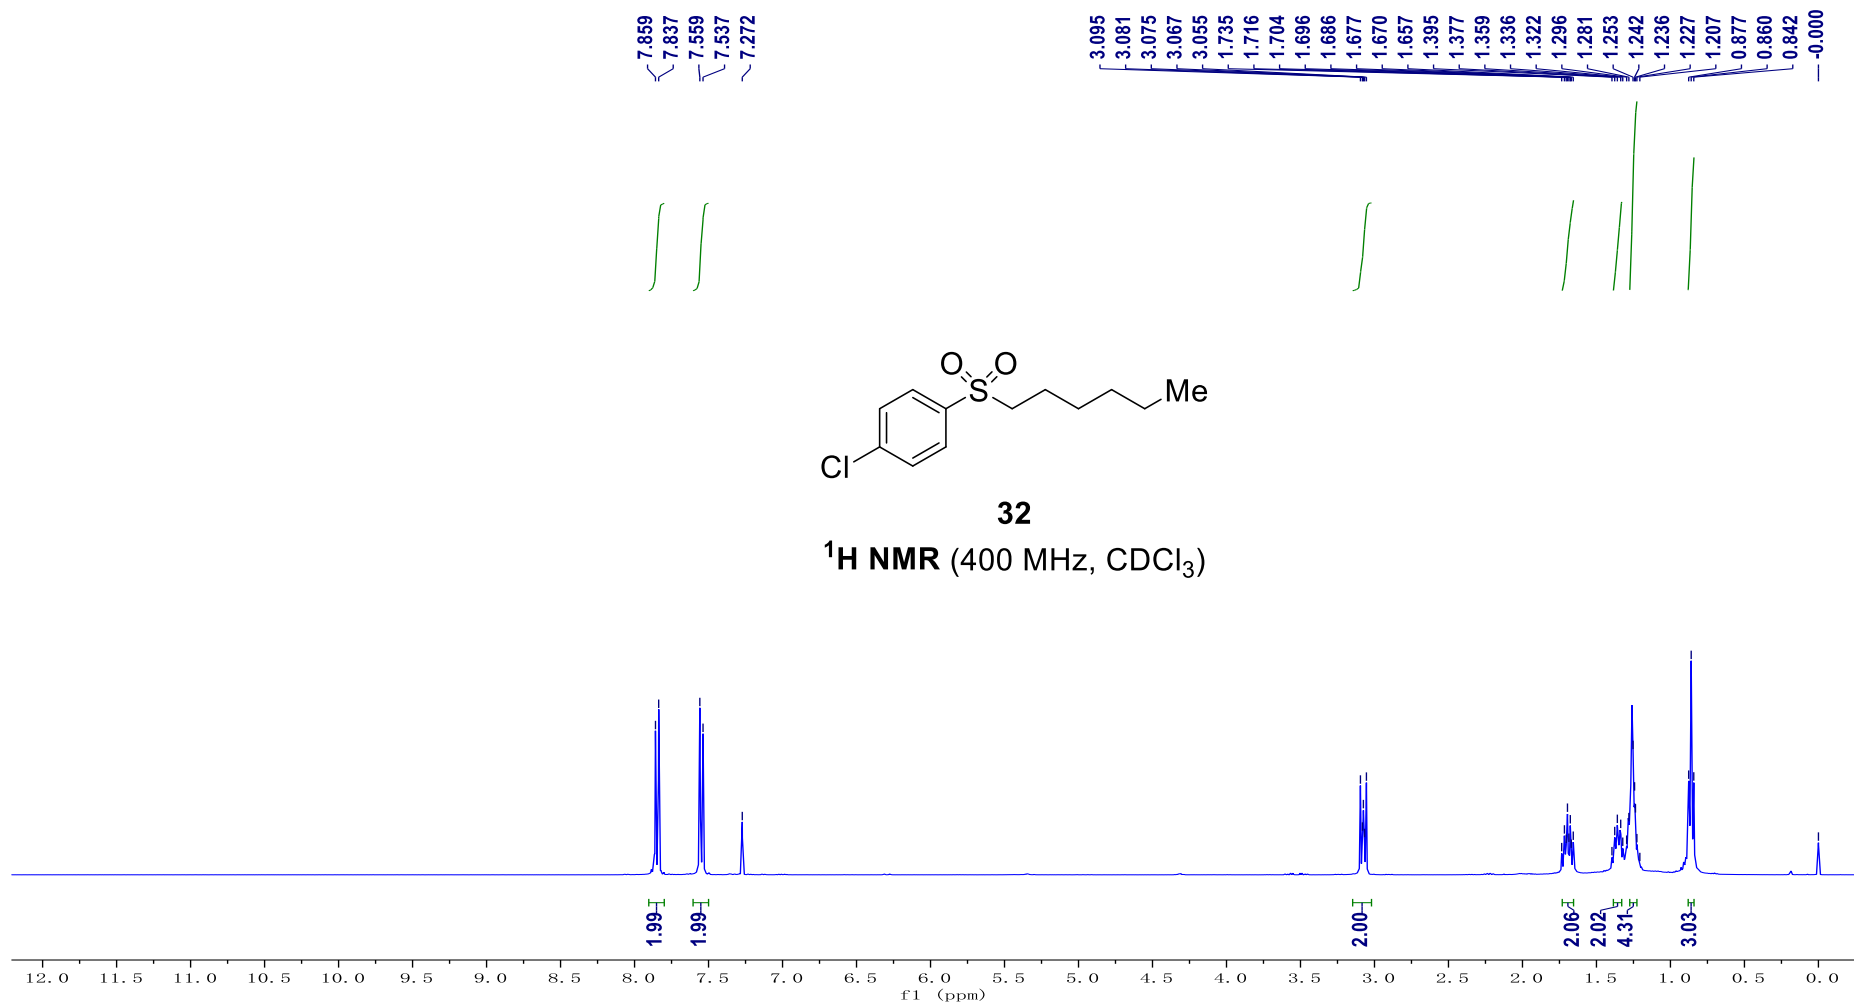

— 140.326  
— 137.627

129.548  
129.528

77.318  
77.000  
76.682

— 56.326

— 31.079  
— 27.851  
22.571  
22.212

— 13.836

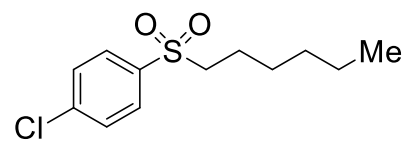

**32**

**<sup>13</sup>C NMR (100 MHz, CDCl<sub>3</sub>)**

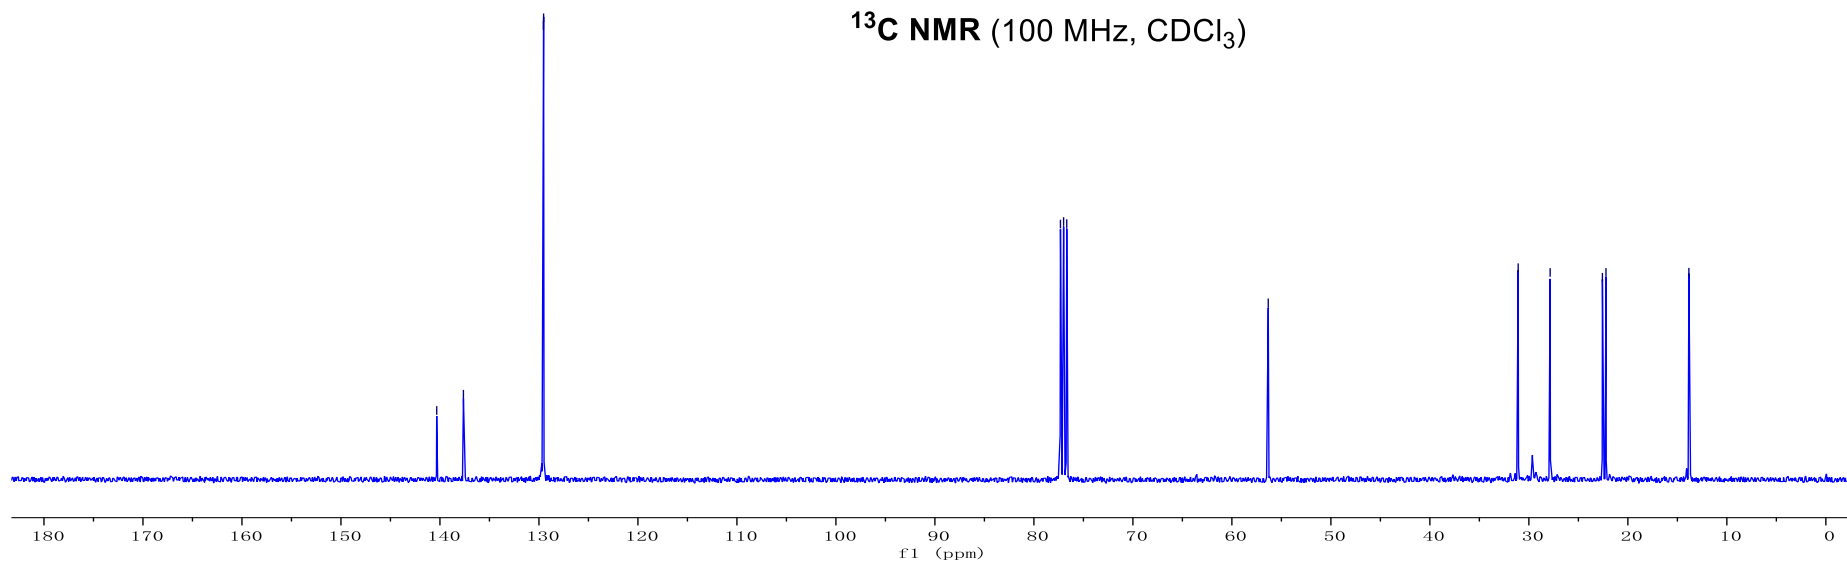

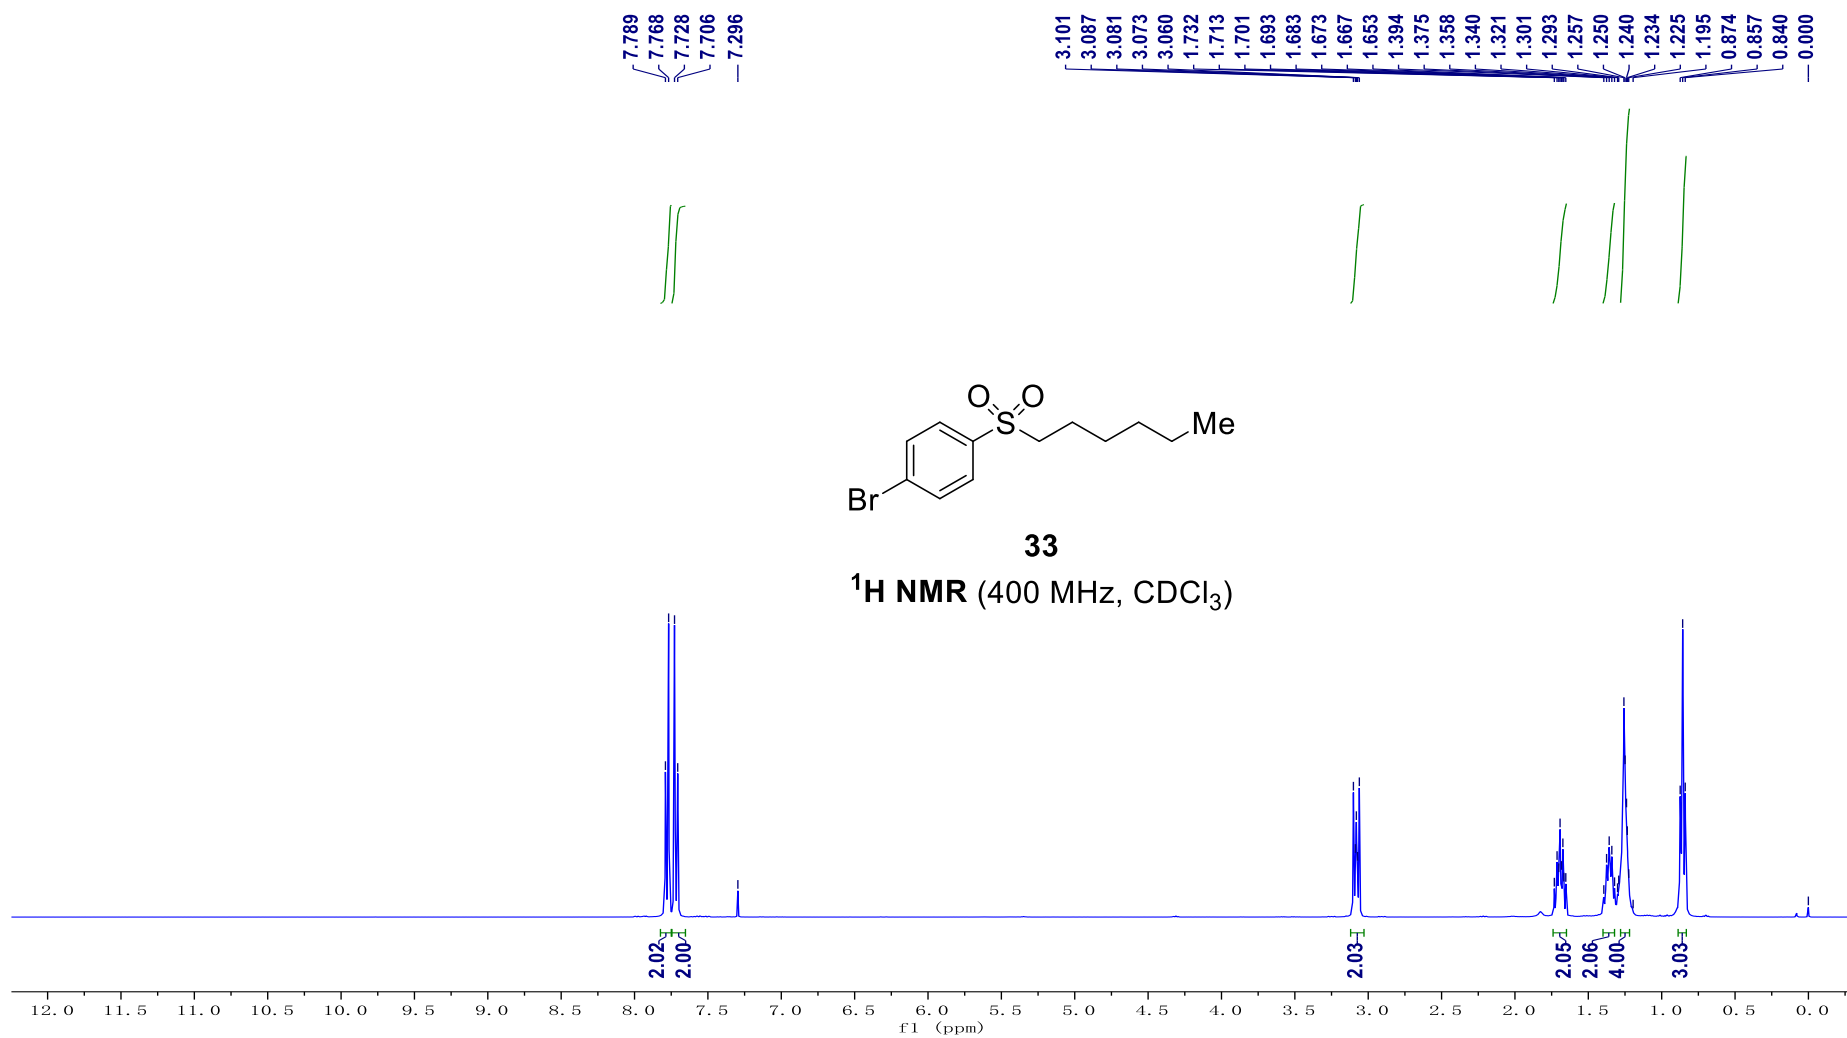

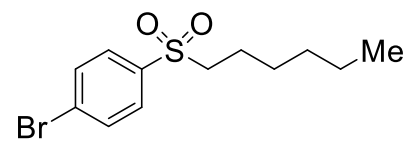

**33**

**<sup>13</sup>C NMR (75 MHz, CDCl<sub>3</sub>)**

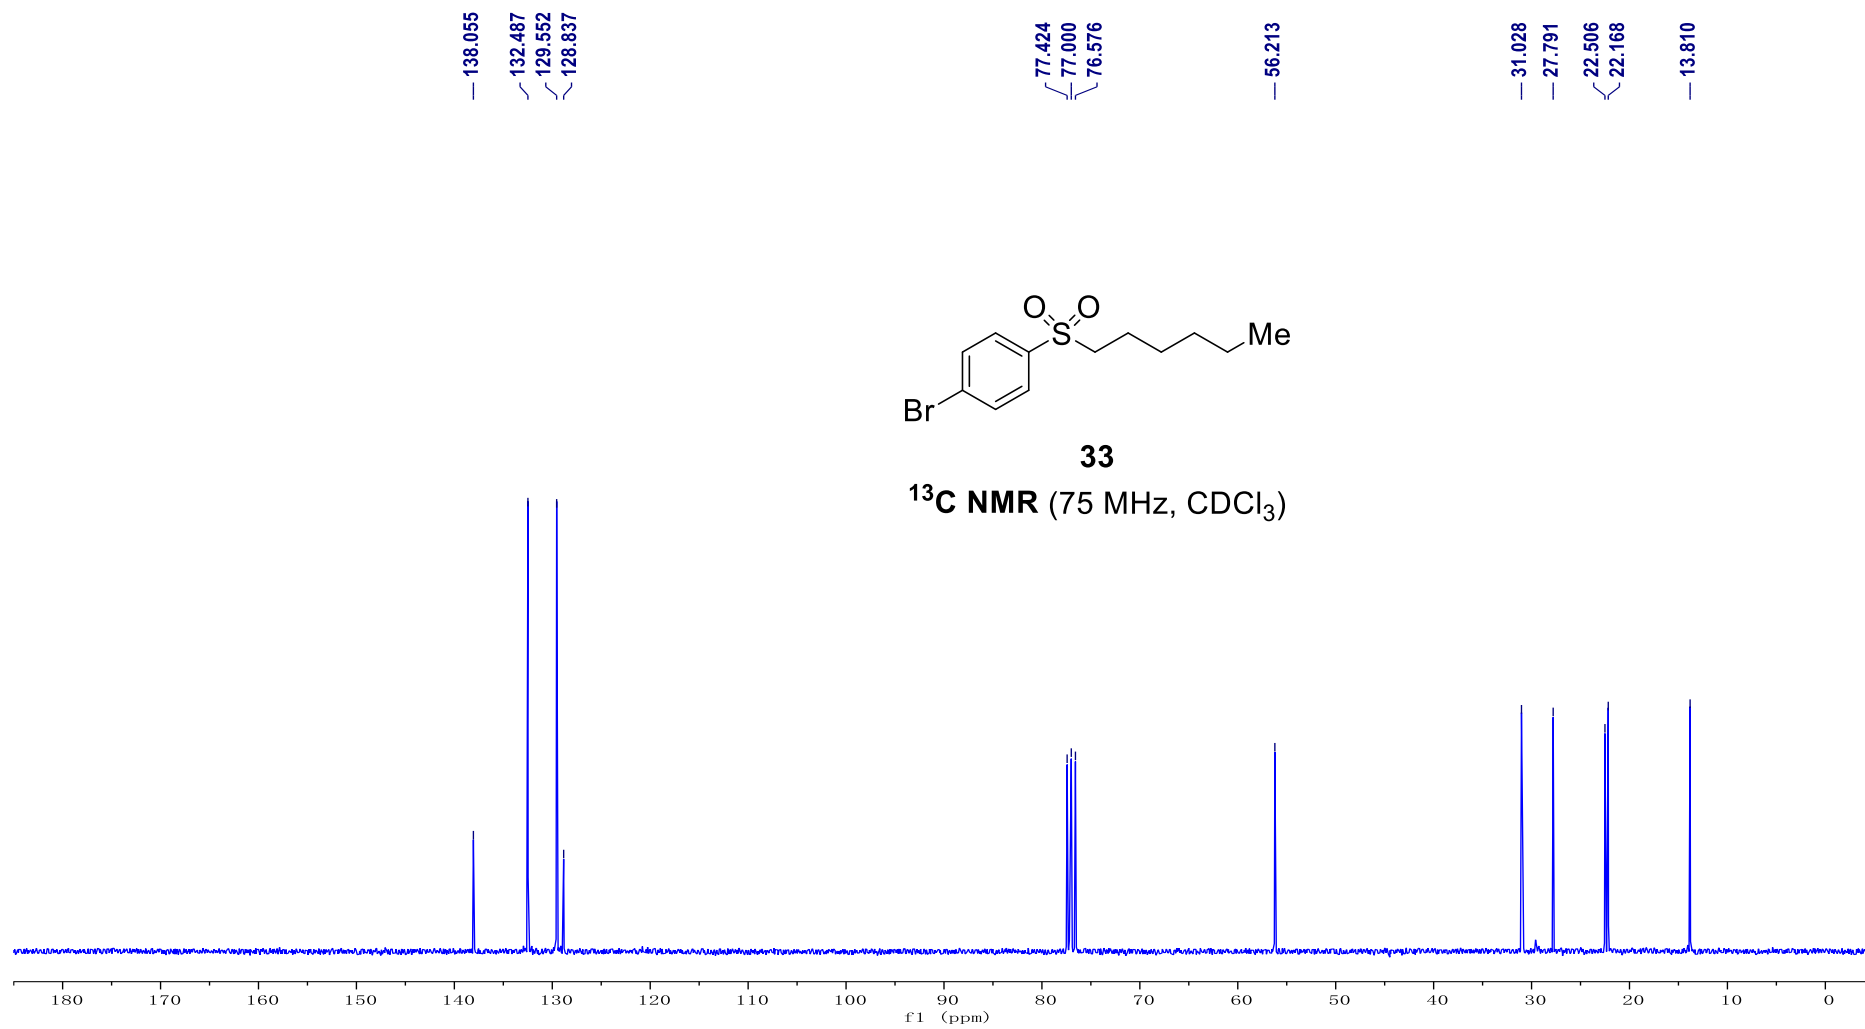

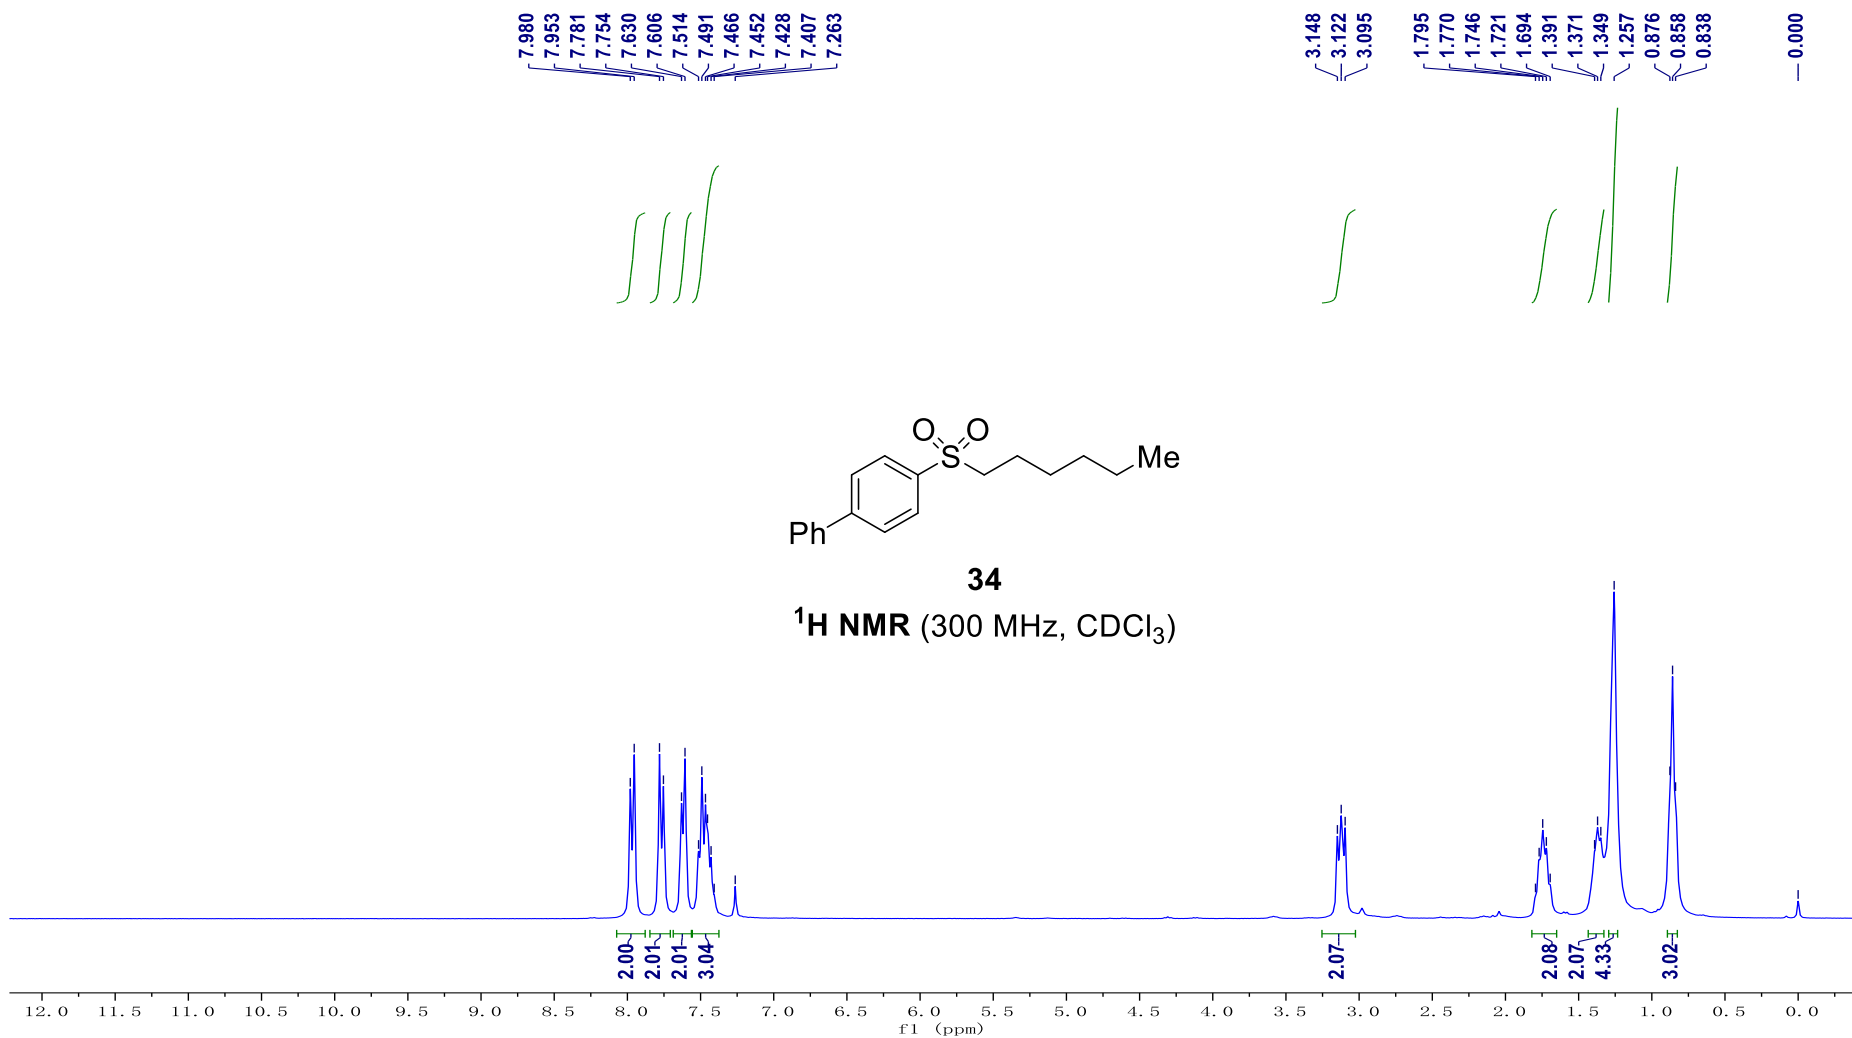

— 146.482  
— 139.050  
— 137.608  
— 129.022  
— 128.586  
— 128.515  
— 127.784  
— 127.306

— 77.424  
— 77.000  
— 76.576

— 56.354

— 31.096  
— 27.884  
— 22.583  
— 22.222

— 13.850

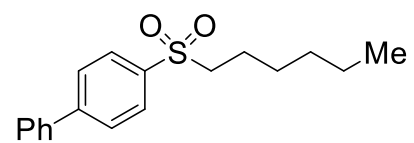

**34**

**<sup>13</sup>C NMR (75 MHz, CDCl<sub>3</sub>)**

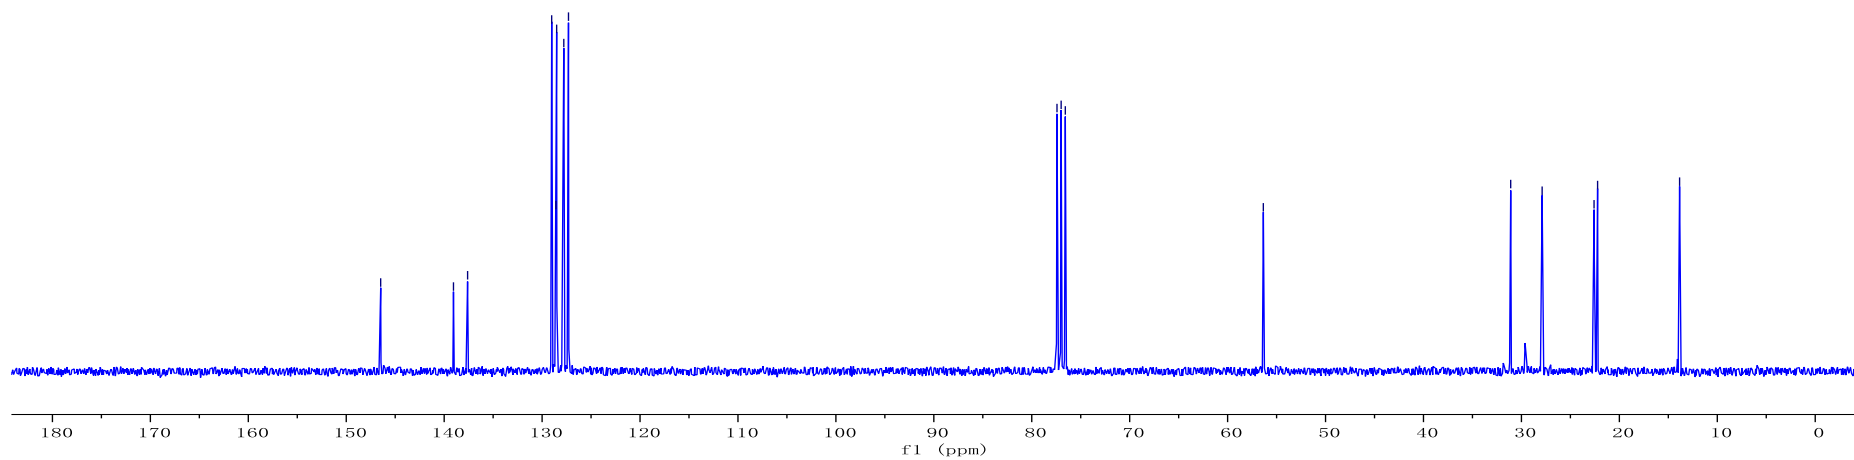

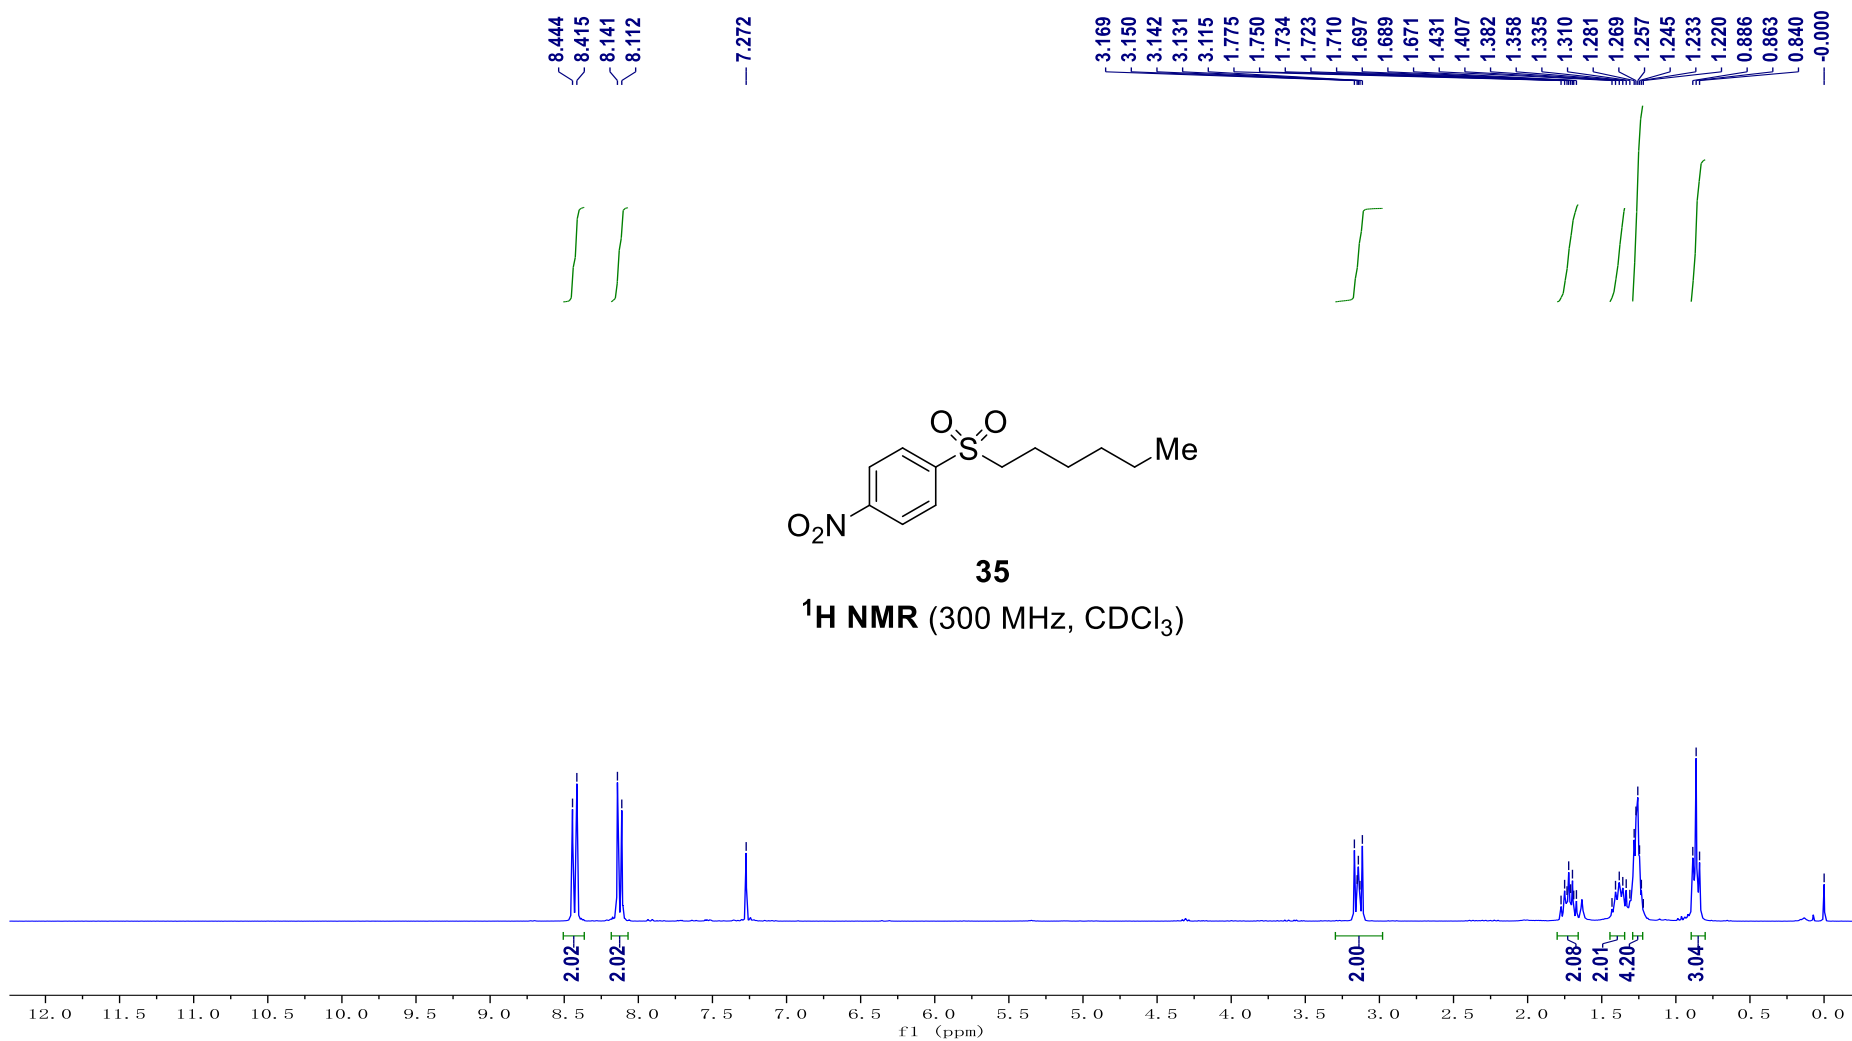



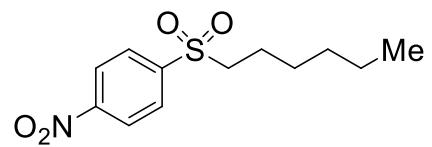

**35**

**<sup>13</sup>C NMR (75 MHz, CDCl<sub>3</sub>)**

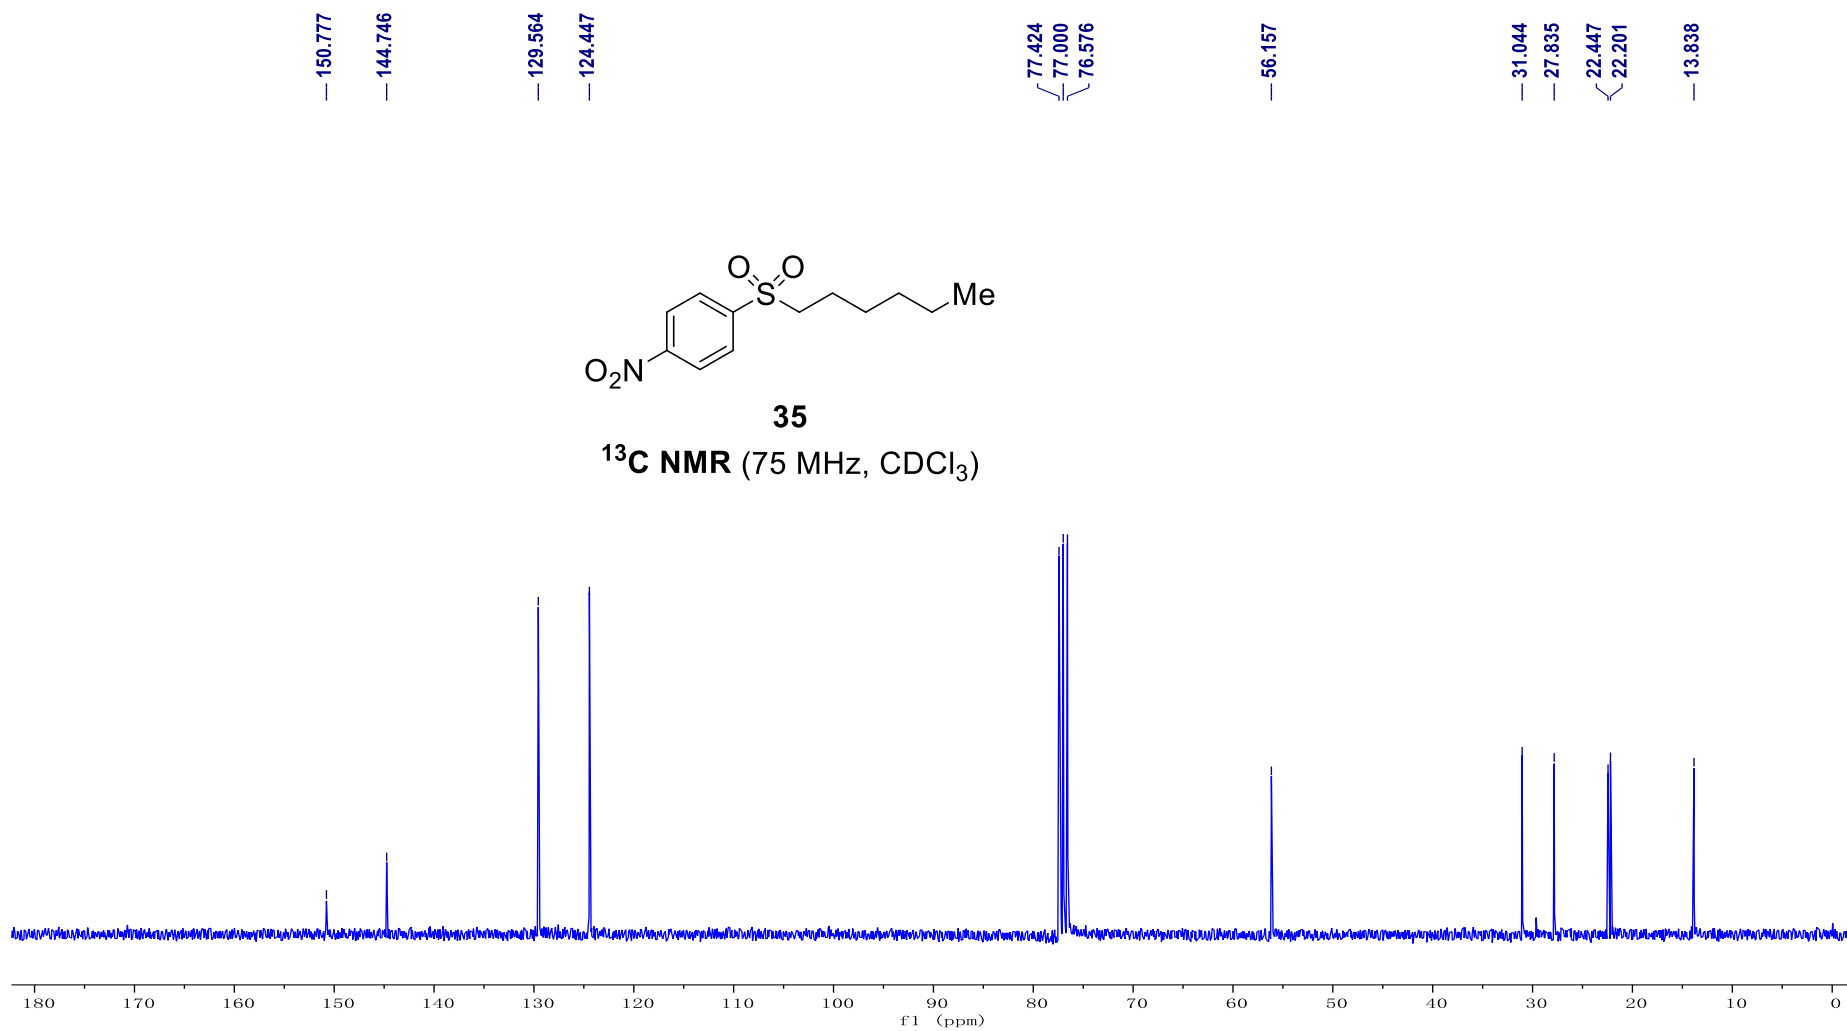

7.495  
7.480  
7.473  
7.464  
7.445  
7.404  
7.401  
7.267  
7.196  
7.183  
7.176  
7.166  
7.160  
7.153  
7.141

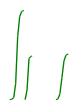

3.876  
3.099  
3.085  
3.079  
3.059  
1.752  
1.733  
1.721  
1.713  
1.703  
1.694  
1.687  
1.674  
1.394  
1.372  
1.358  
1.335  
1.322  
1.286  
1.260  
1.255  
1.243  
1.229  
0.875  
0.858  
0.841  
-0.000

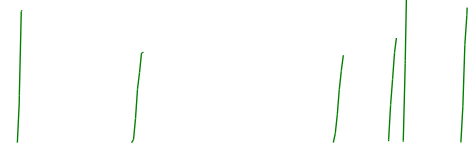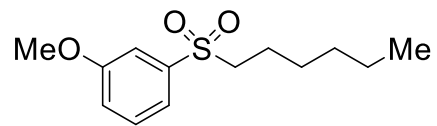

**36**

<sup>1</sup>H NMR (400 MHz, CDCl<sub>3</sub>)

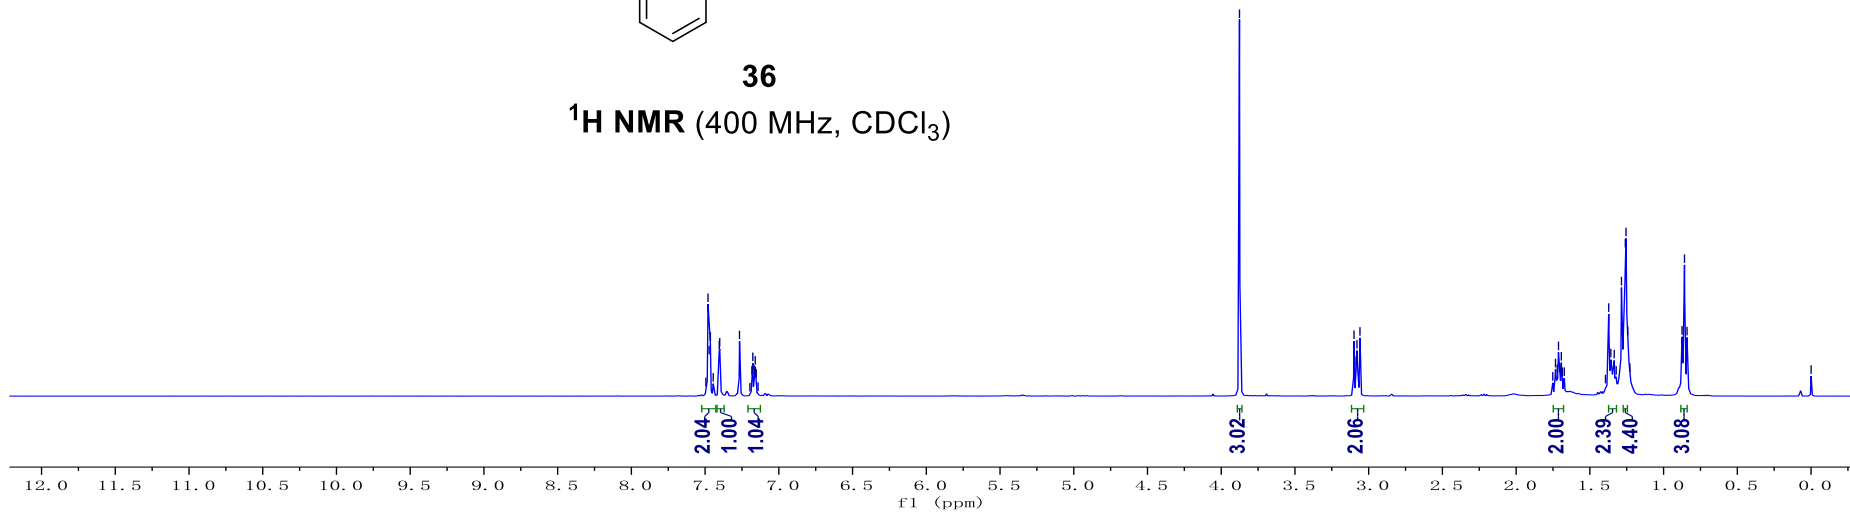

— 159.991  
— 140.354  
— 130.302  
120.134  
120.017  
— 112.448  
77.318  
77.000  
76.683  
56.241  
55.677  
— 31.113  
— 27.898  
22.530  
22.238  
— 13.856

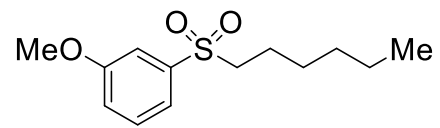

**36**

**<sup>13</sup>C NMR (100 MHz, CDCl<sub>3</sub>)**

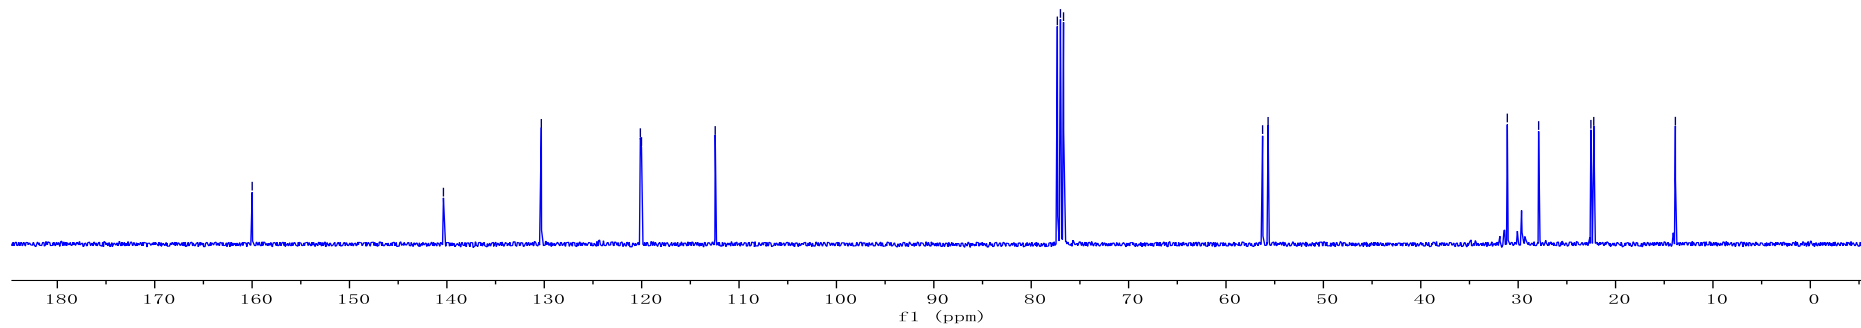

7.967  
7.963  
7.947  
7.943  
7.614  
7.610  
7.593  
7.575  
7.571  
7.275  
7.125  
7.106  
7.087  
7.059  
7.038

3.984  
3.363  
3.348  
3.343  
3.336  
3.322  
1.717  
1.698  
1.686  
1.678  
1.670  
1.659  
1.639  
1.403  
1.385  
1.366  
1.348  
1.330  
1.298  
1.286  
1.257  
1.248  
1.238  
1.229  
1.206  
0.872  
0.855  
0.837  
0.000

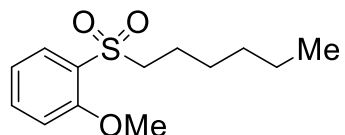

37

<sup>1</sup>H NMR (400 MHz, CDCl<sub>3</sub>)

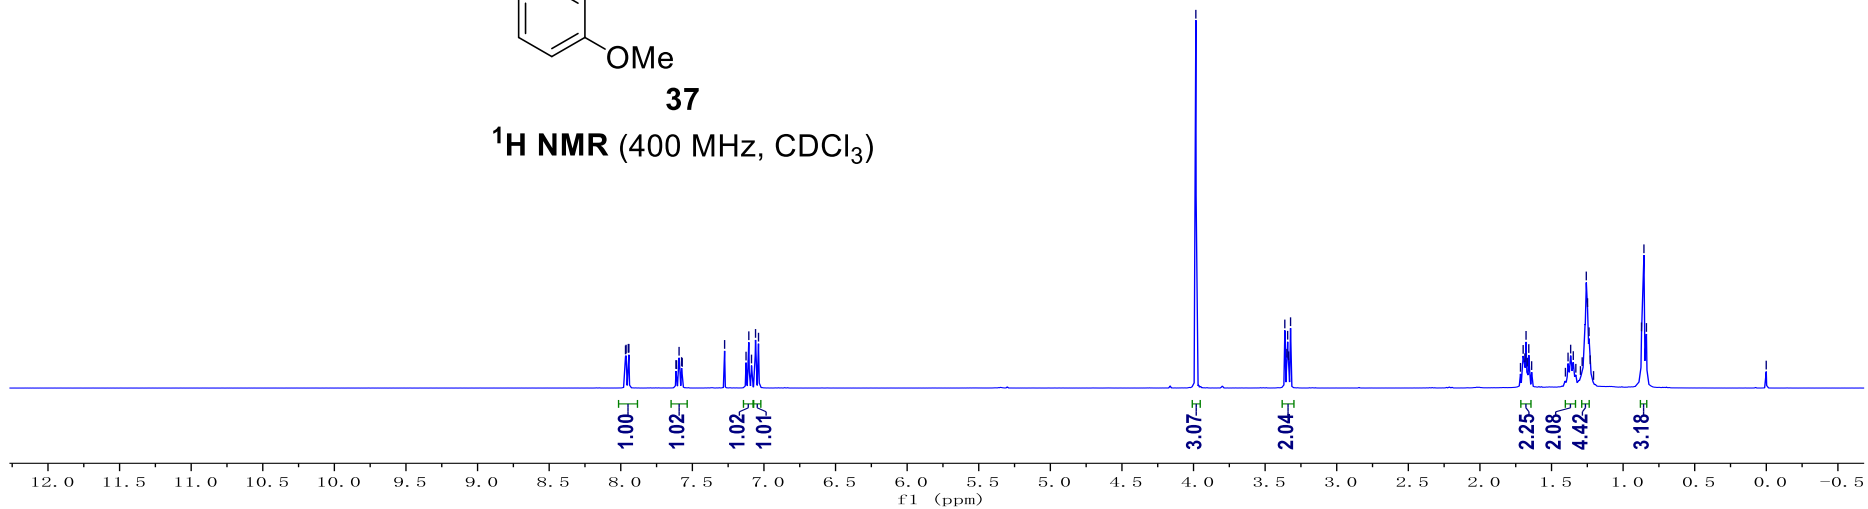

— 157.228

— 135.411  
— 130.509  
— 126.807

— 120.674

— 112.172

— 77.424  
— 77.000  
— 76.576

— 56.199  
— 54.264

— 31.082  
— 27.878  
— 22.276  
— 22.192

— 13.861

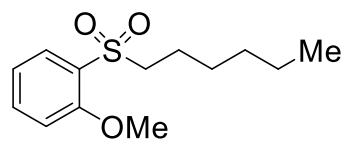

**37**

**<sup>13</sup>C NMR (75 MHz, CDCl<sub>3</sub>)**

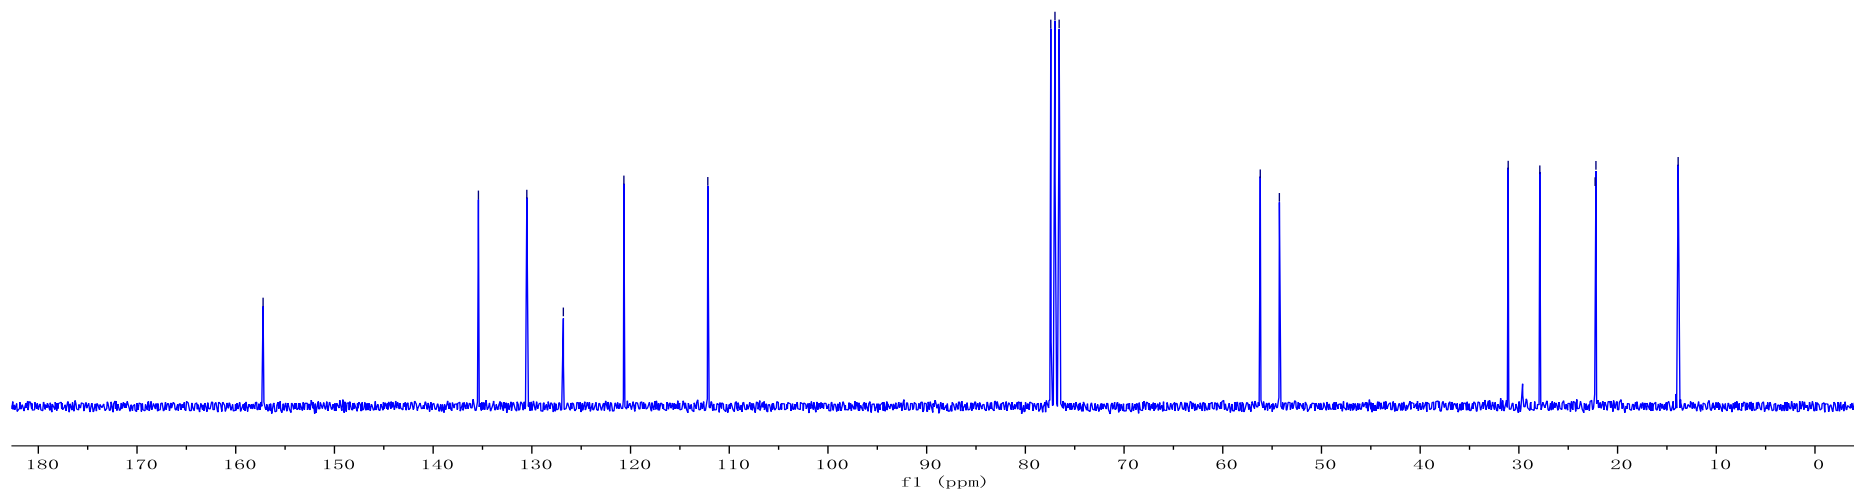

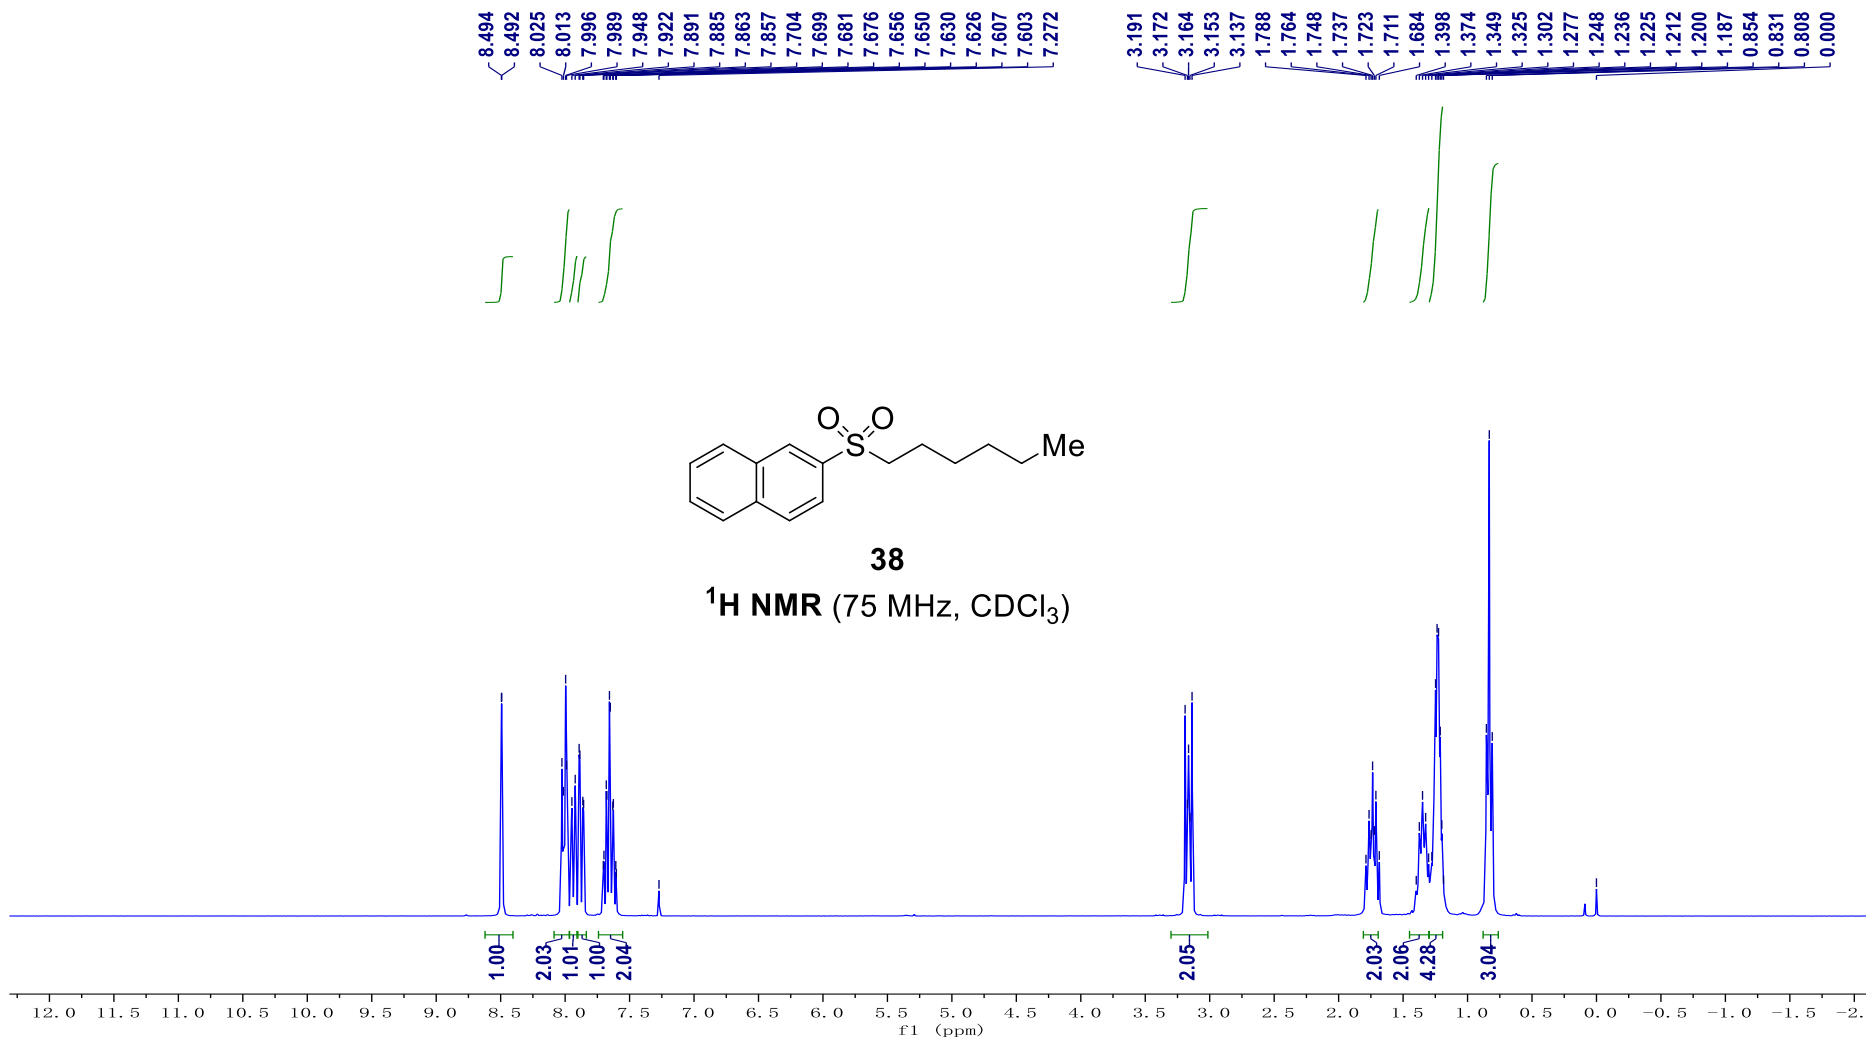

135.987  
135.190  
132.092  
129.745  
129.490  
129.321  
129.155  
127.917  
127.629  
122.680

77.318  
77.000  
76.682

56.284

31.068  
27.878  
22.626  
22.195  
13.818

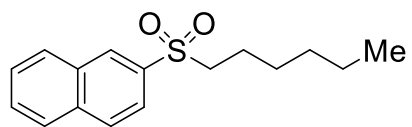

**38**

<sup>13</sup>C NMR (100 MHz, CDCl<sub>3</sub>)

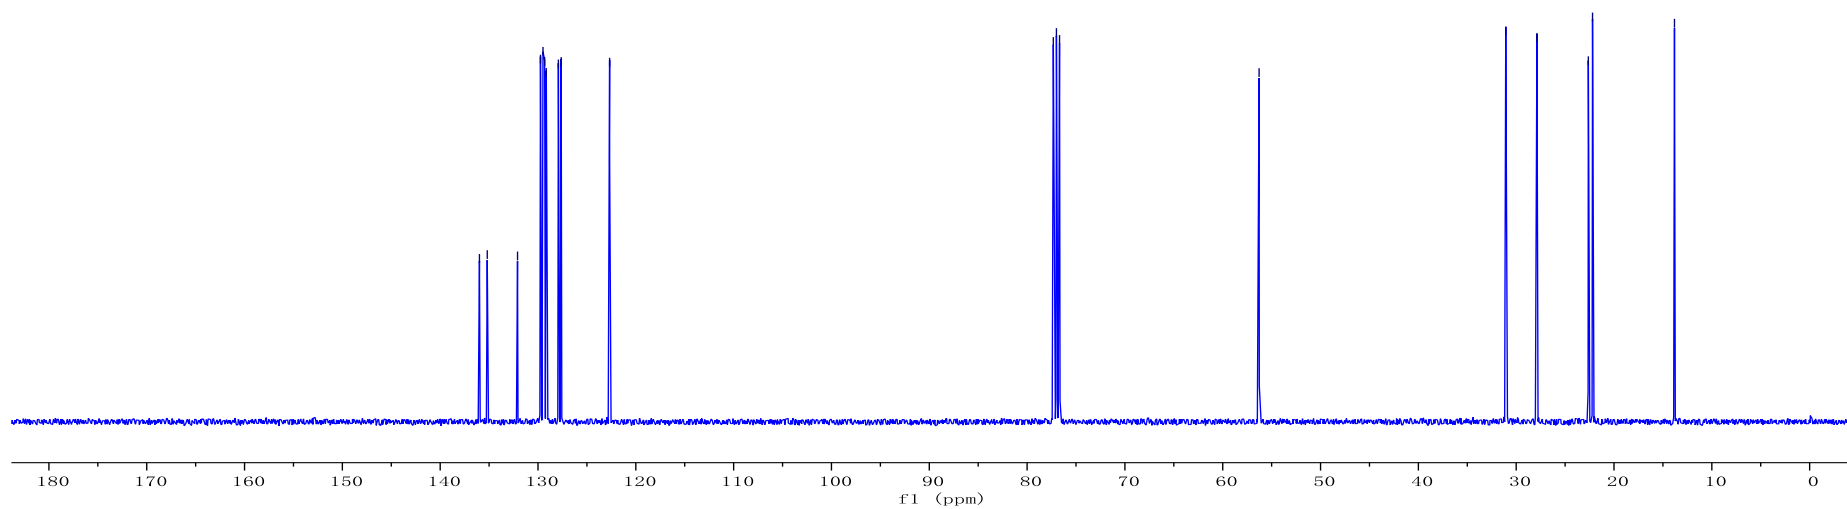

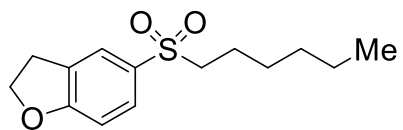

39

<sup>1</sup>H NMR (400 MHz, CDCl<sub>3</sub>)

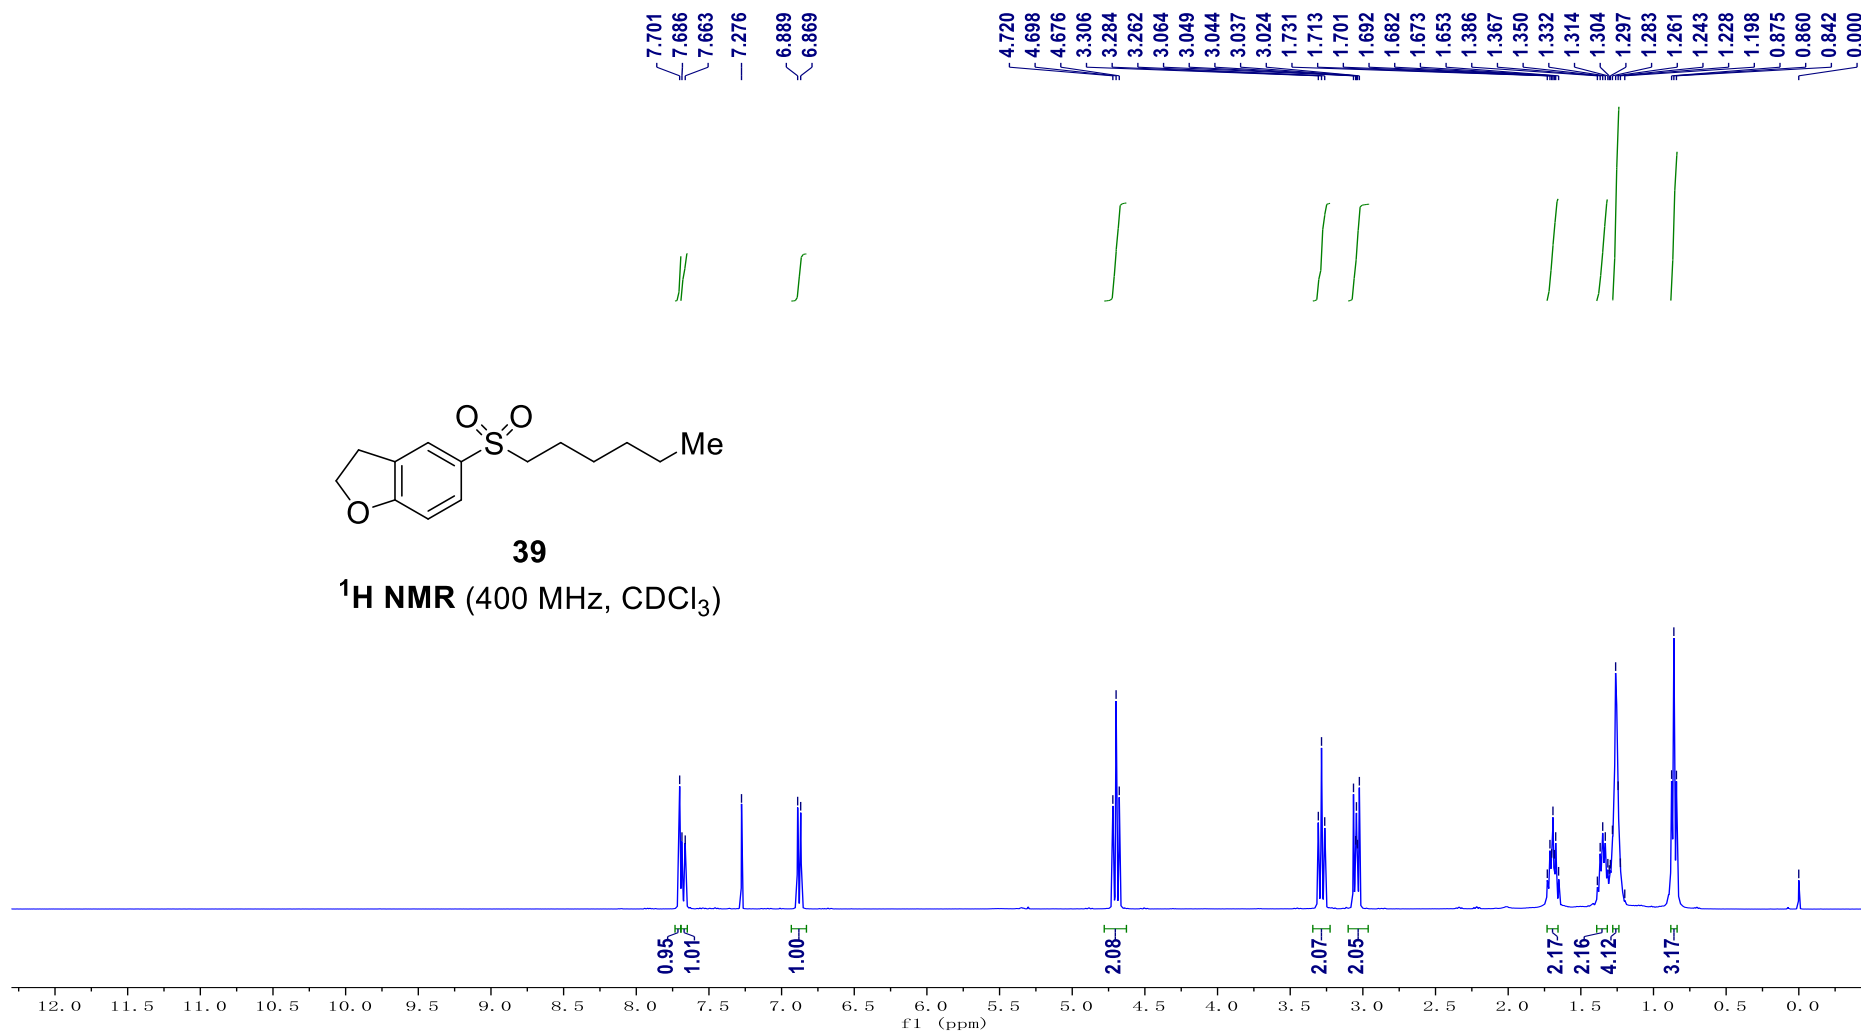



— 164.531

130.722  
129.697  
128.497  
125.168

— 109.645

77.317  
77.000  
76.682  
72.344

— 56.656

31.140  
28.949  
27.902  
22.763  
22.250

— 13.862

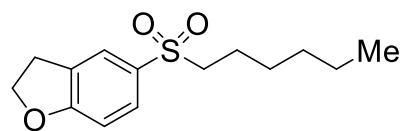

**39**

**<sup>13</sup>C NMR (100 MHz, CDCl<sub>3</sub>)**

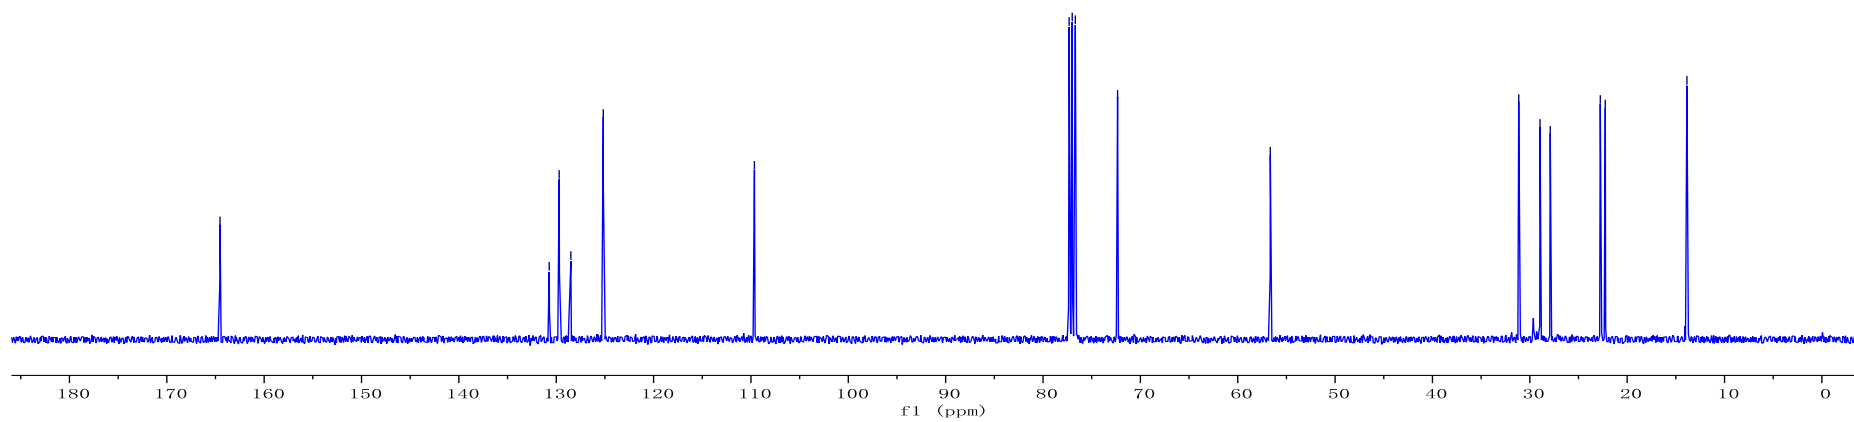

7.731  
7.715  
7.698  
7.686  
7.271  
7.182  
7.169  
7.153

3.219  
3.193  
3.165  
1.823  
1.799  
1.784  
1.772  
1.759  
1.746  
1.720  
1.430  
1.406  
1.382  
1.359  
1.335  
1.288  
1.277  
1.266  
1.256  
0.890  
0.868  
0.846

-0.000

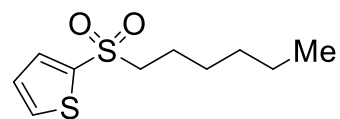

**40**

**<sup>1</sup>H NMR (300 MHz, CDCl<sub>3</sub>)**

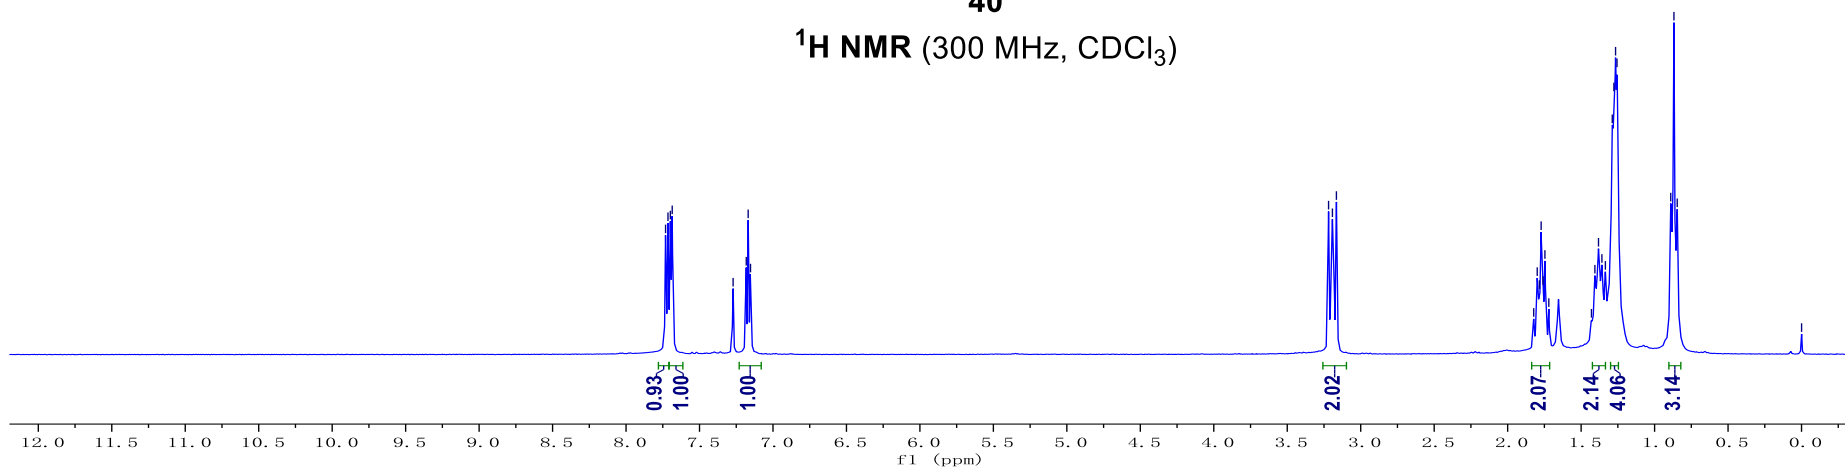

— 140.190  
133.945  
133.791  
— 127.841

77.423  
77.000  
76.576

— 57.722

31.115  
27.790  
22.934  
22.235

— 13.874

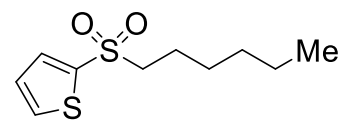

**40**

**<sup>13</sup>C NMR (75 MHz, CDCl<sub>3</sub>)**

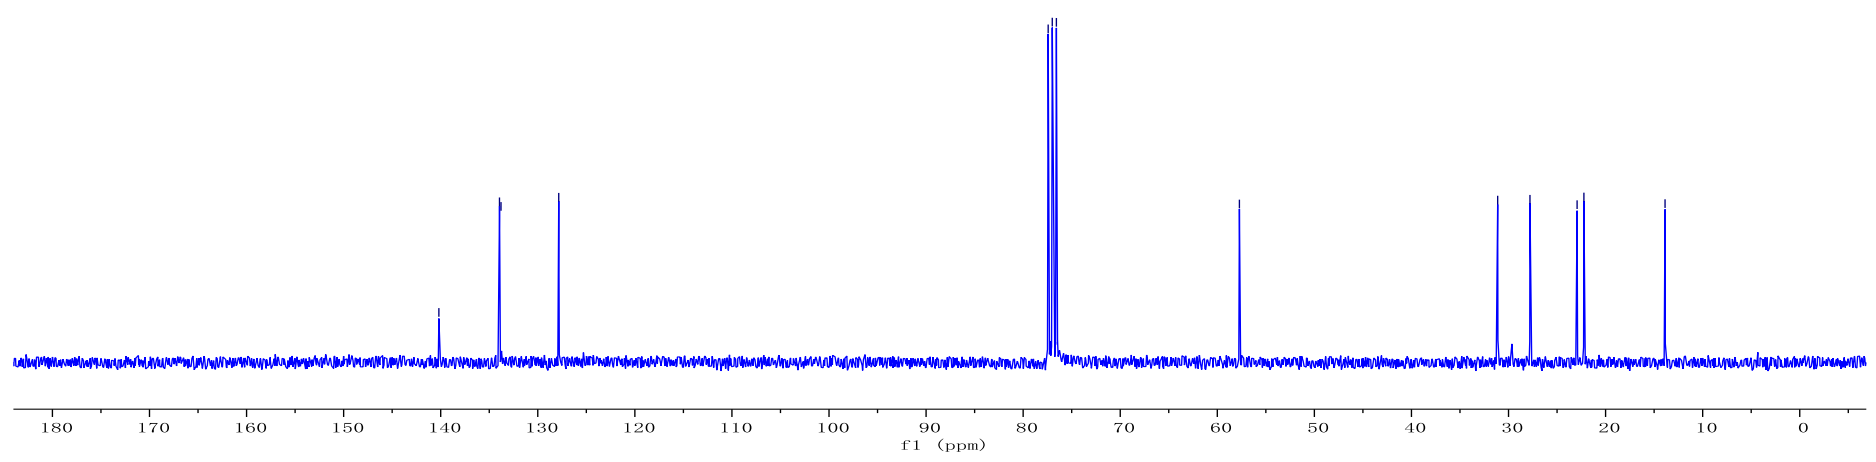

9.126  
9.121  
8.900  
8.898  
8.889  
8.886  
8.218  
8.214  
8.210  
8.199  
8.194  
8.190  
7.551  
7.539  
7.531  
7.519  
7.277

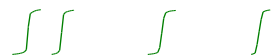

3.153  
3.133  
3.112  
1.773  
1.755  
1.734  
1.715  
1.695  
1.418  
1.399  
1.381  
1.363  
1.345  
1.335  
1.303  
1.269  
1.260  
0.881  
0.864  
0.847  
-0.000

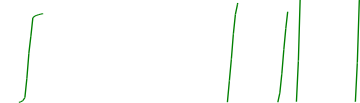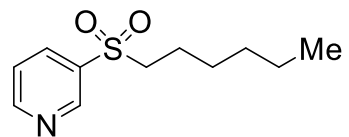

41

<sup>1</sup>H NMR (400 MHz, CDCl<sub>3</sub>)

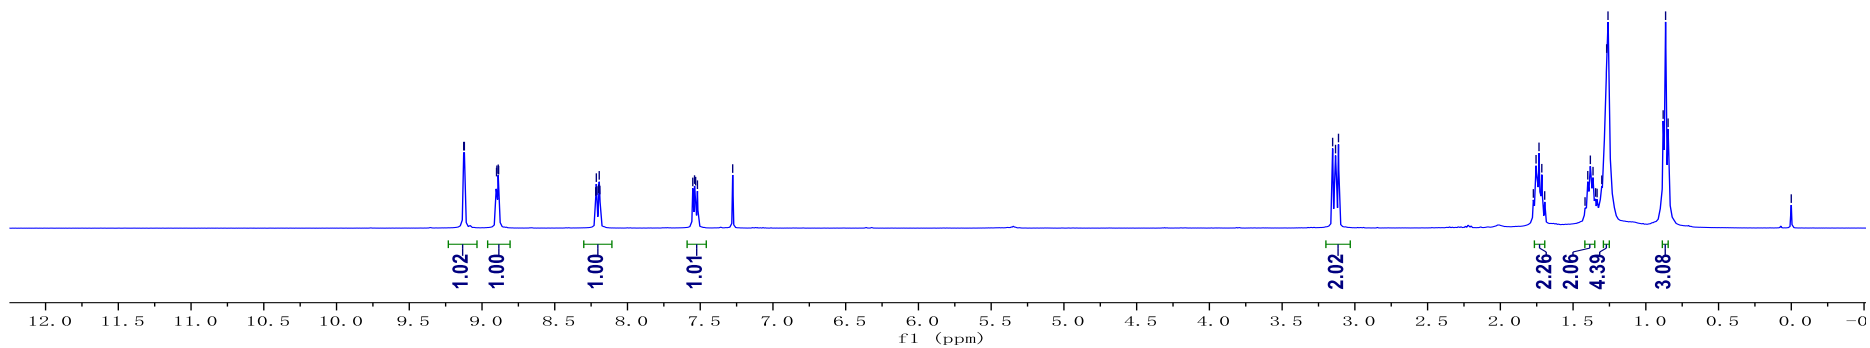

— 154.181

— 149.122

— 135.889  
— 135.613

— 123.817

— 77.424  
— 77.000  
— 76.577

— 56.630

— 31.062  
— 27.828

— 22.487  
— 22.208

— 13.846

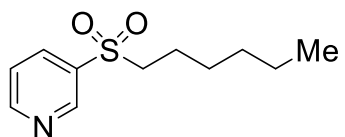

**41**

**<sup>1</sup>H NMR (75 MHz, CDCl<sub>3</sub>)**

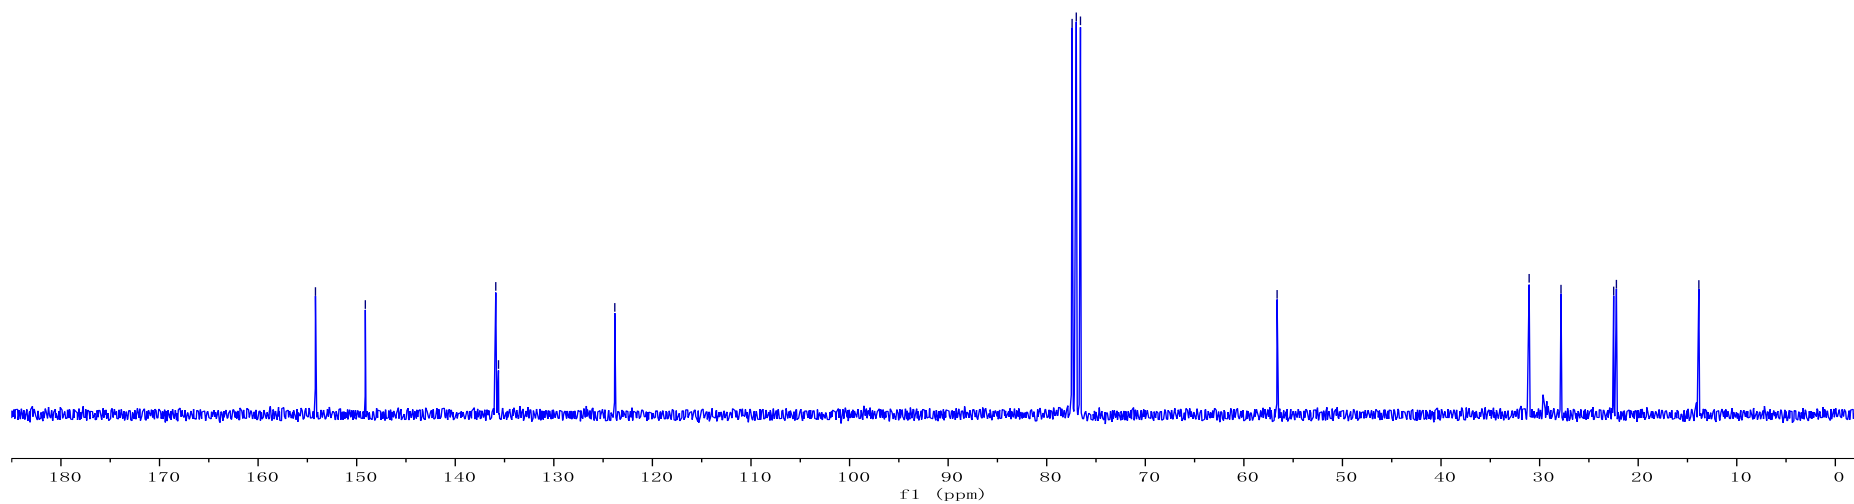

7.326  
7.308  
7.289  
7.259  
7.241  
7.223  
7.196  
7.178

3.036  
3.022  
3.016  
3.009  
2.996  
2.804  
2.785  
2.767  
2.370  
2.357  
2.349  
2.338  
2.326  
2.318  
2.306  
2.254  
2.235  
2.216  
2.196  
2.177  
1.237  
1.224  
1.219  
1.213  
1.207  
1.196  
1.031  
1.019  
1.014  
1.000  
0.995  
0.982  
0.000

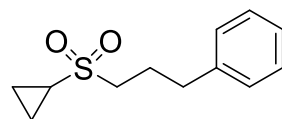

42

<sup>1</sup>H NMR (400 MHz, CDCl<sub>3</sub>)

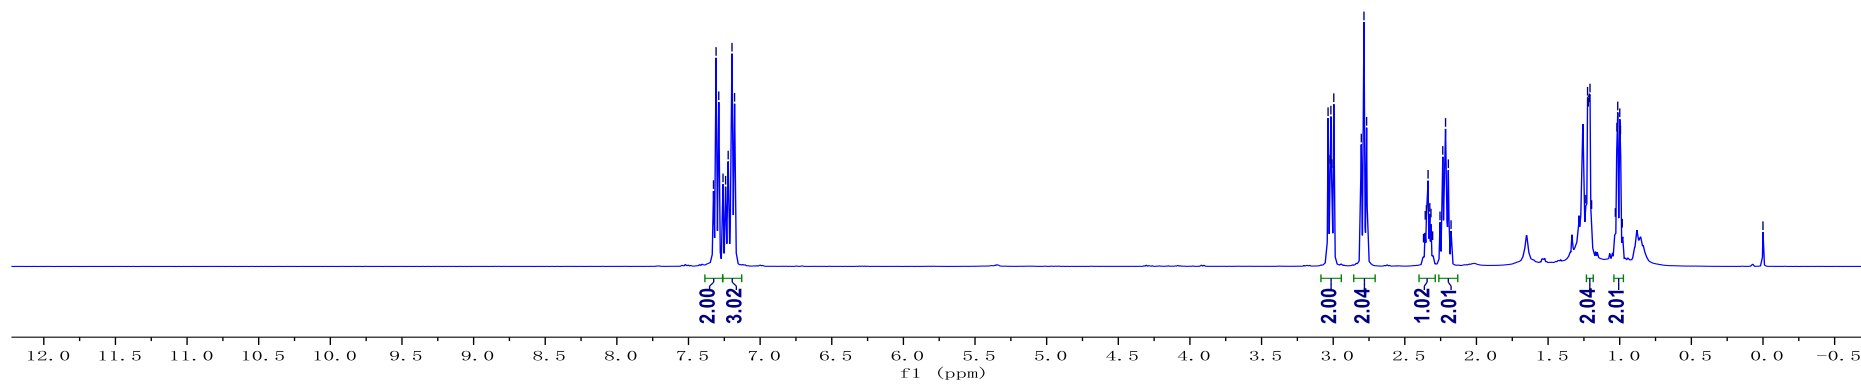

— 139.910

128.609  
128.397  
126.433

77.317  
77.000  
76.682

— 53.056

— 34.279

— 29.164

— 23.713

— 4.539

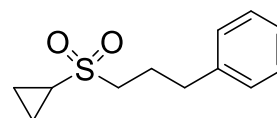

**42**

**<sup>13</sup>C NMR (100 MHz, CDCl<sub>3</sub>)**

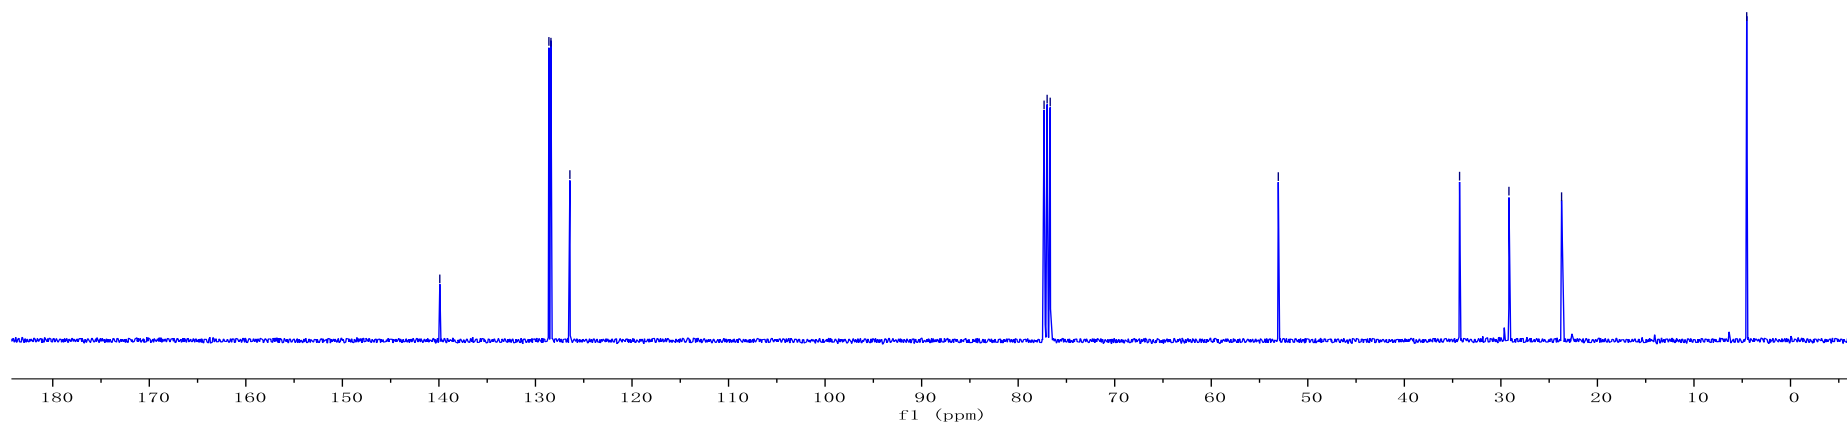

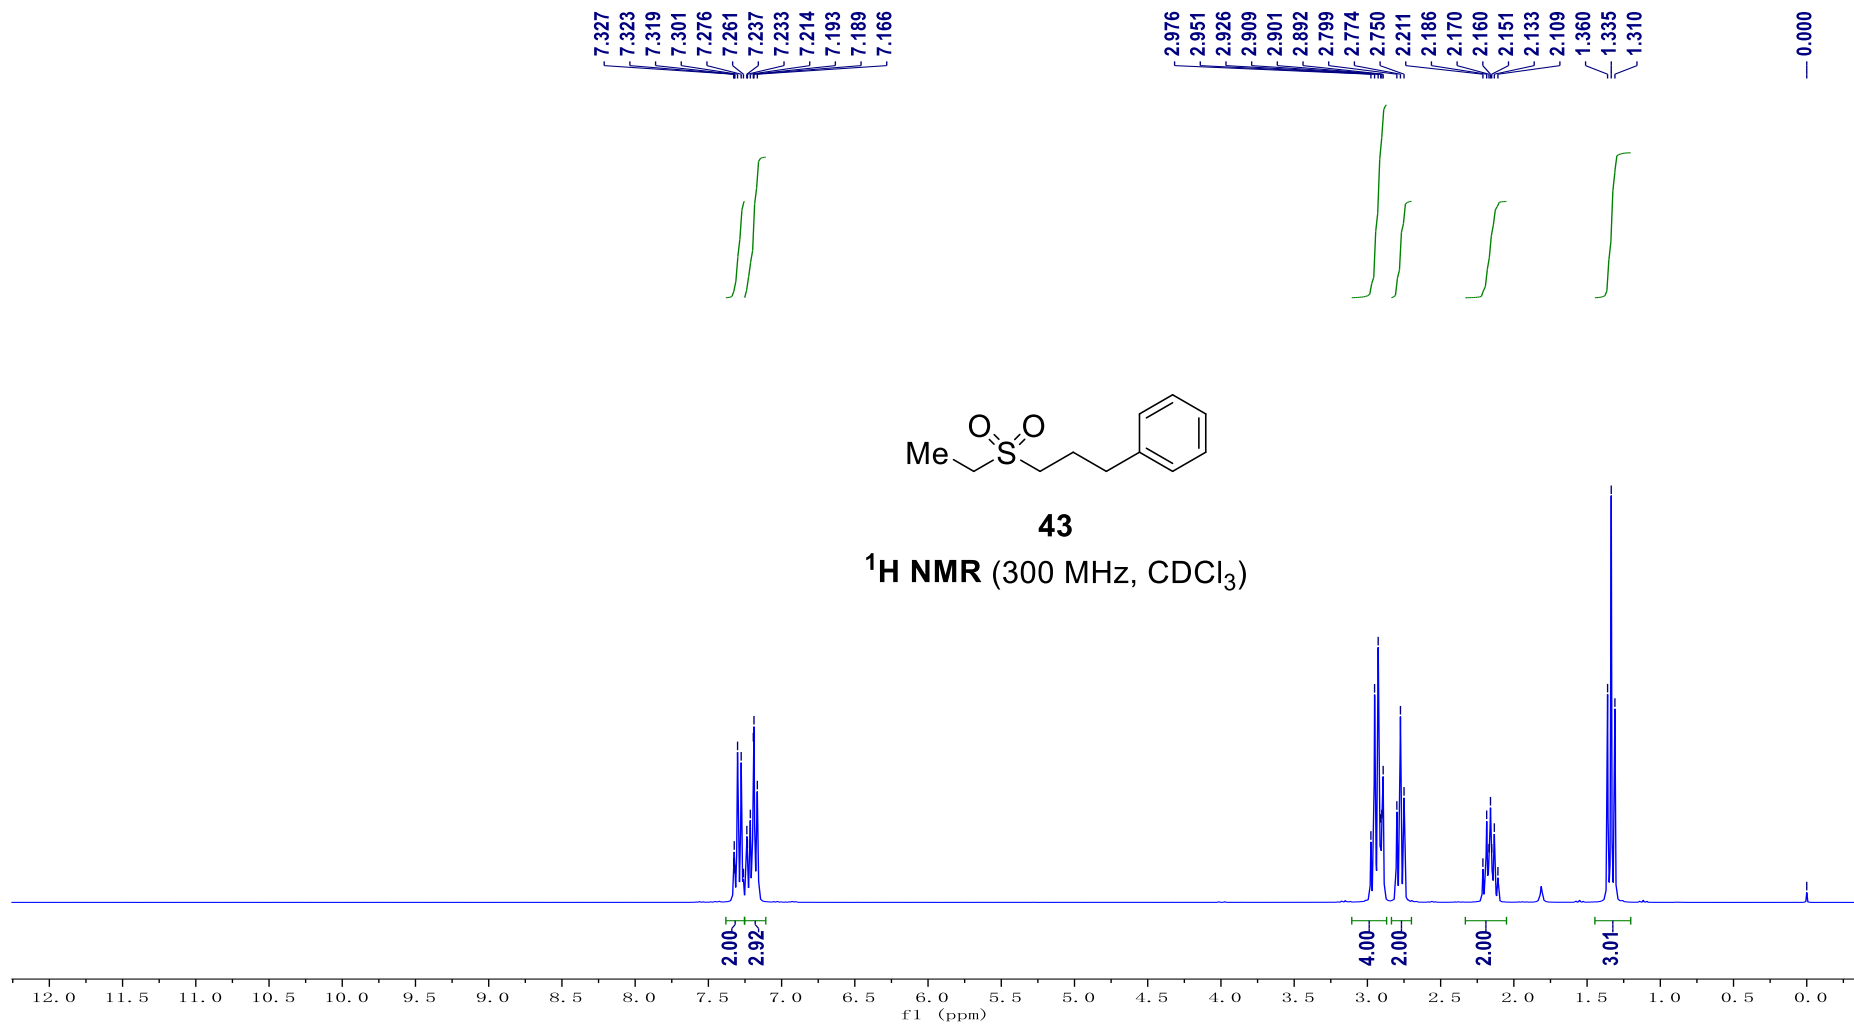



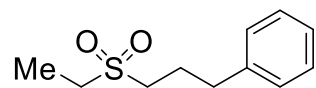

43

<sup>13</sup>C NMR (75 MHz, CDCl<sub>3</sub>)

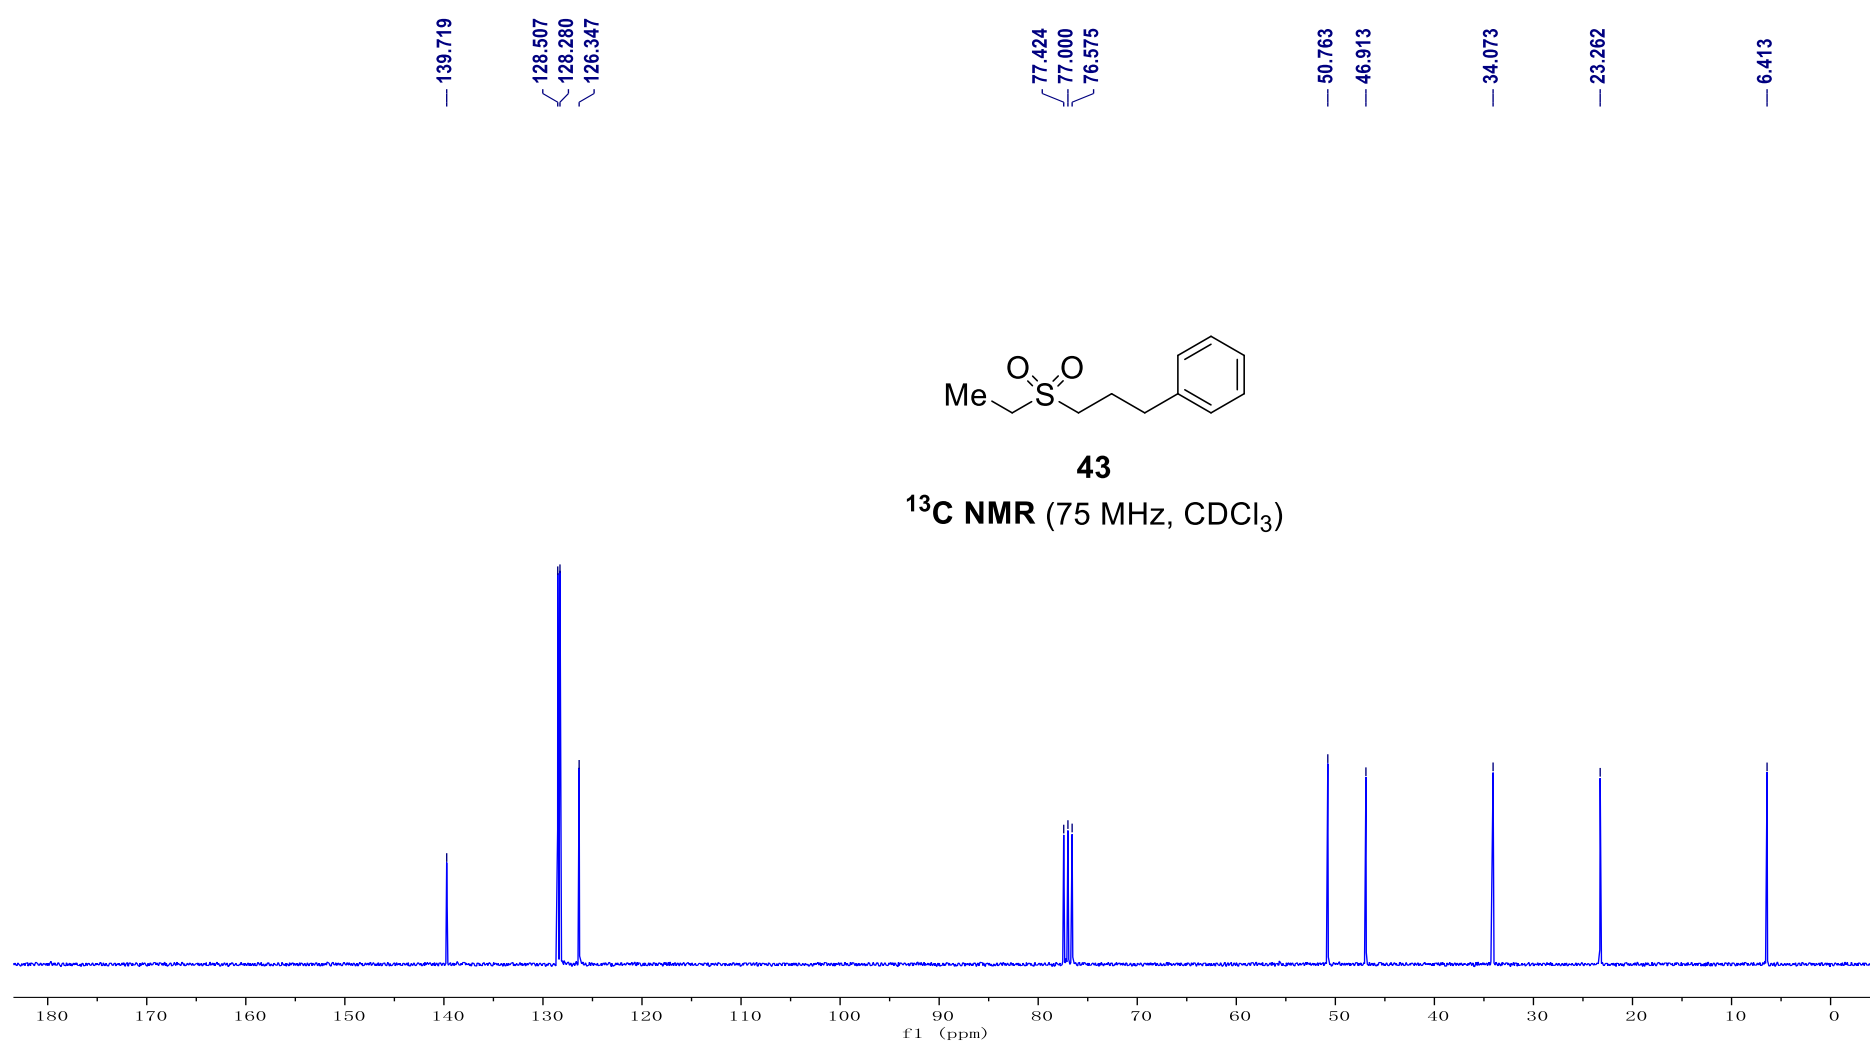

7.317  
7.300  
7.281  
7.249  
7.234  
7.216  
7.197  
7.183  
7.165

3.658  
3.643  
3.627  
3.099  
3.081  
3.061  
2.966  
2.952  
2.946  
2.939  
2.926  
2.788  
2.769  
2.751  
2.280  
2.265  
2.249  
2.243  
2.227  
2.212  
2.205  
2.186  
2.178  
2.173  
2.166  
2.160  
2.155  
2.147  
2.128  
-0.000

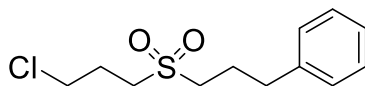

44

$^1\text{H}$  NMR (400 MHz,  $\text{CDCl}_3$ )

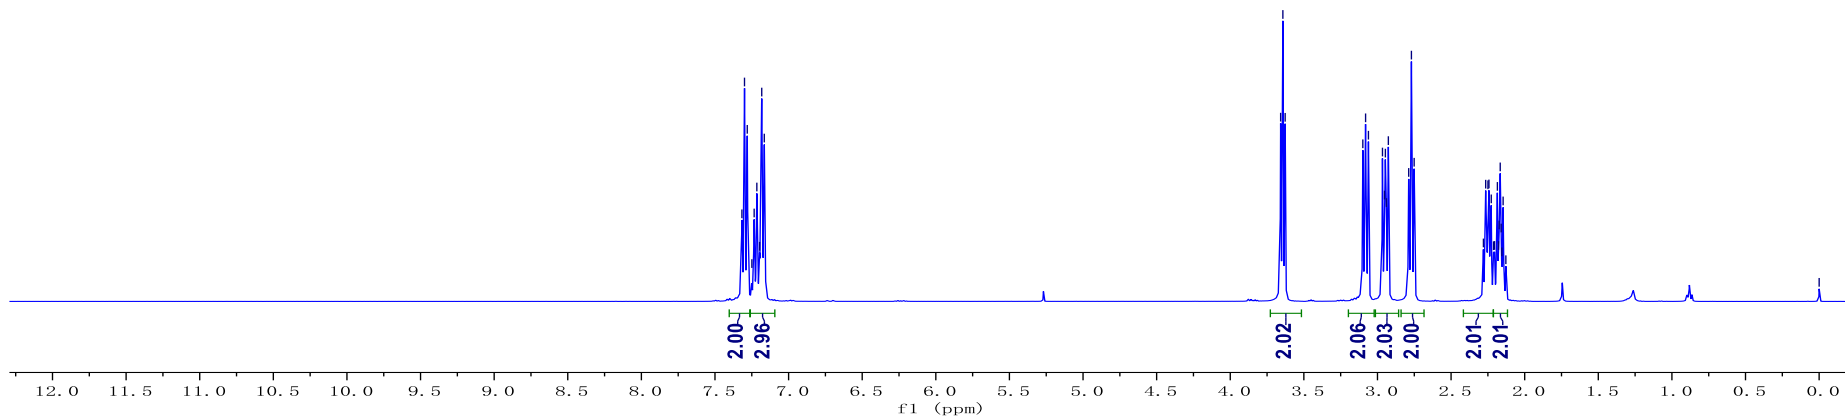

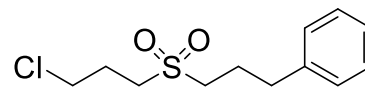

44

$^{13}\text{C}$  NMR (75 MHz,  $\text{CDCl}_3$ )

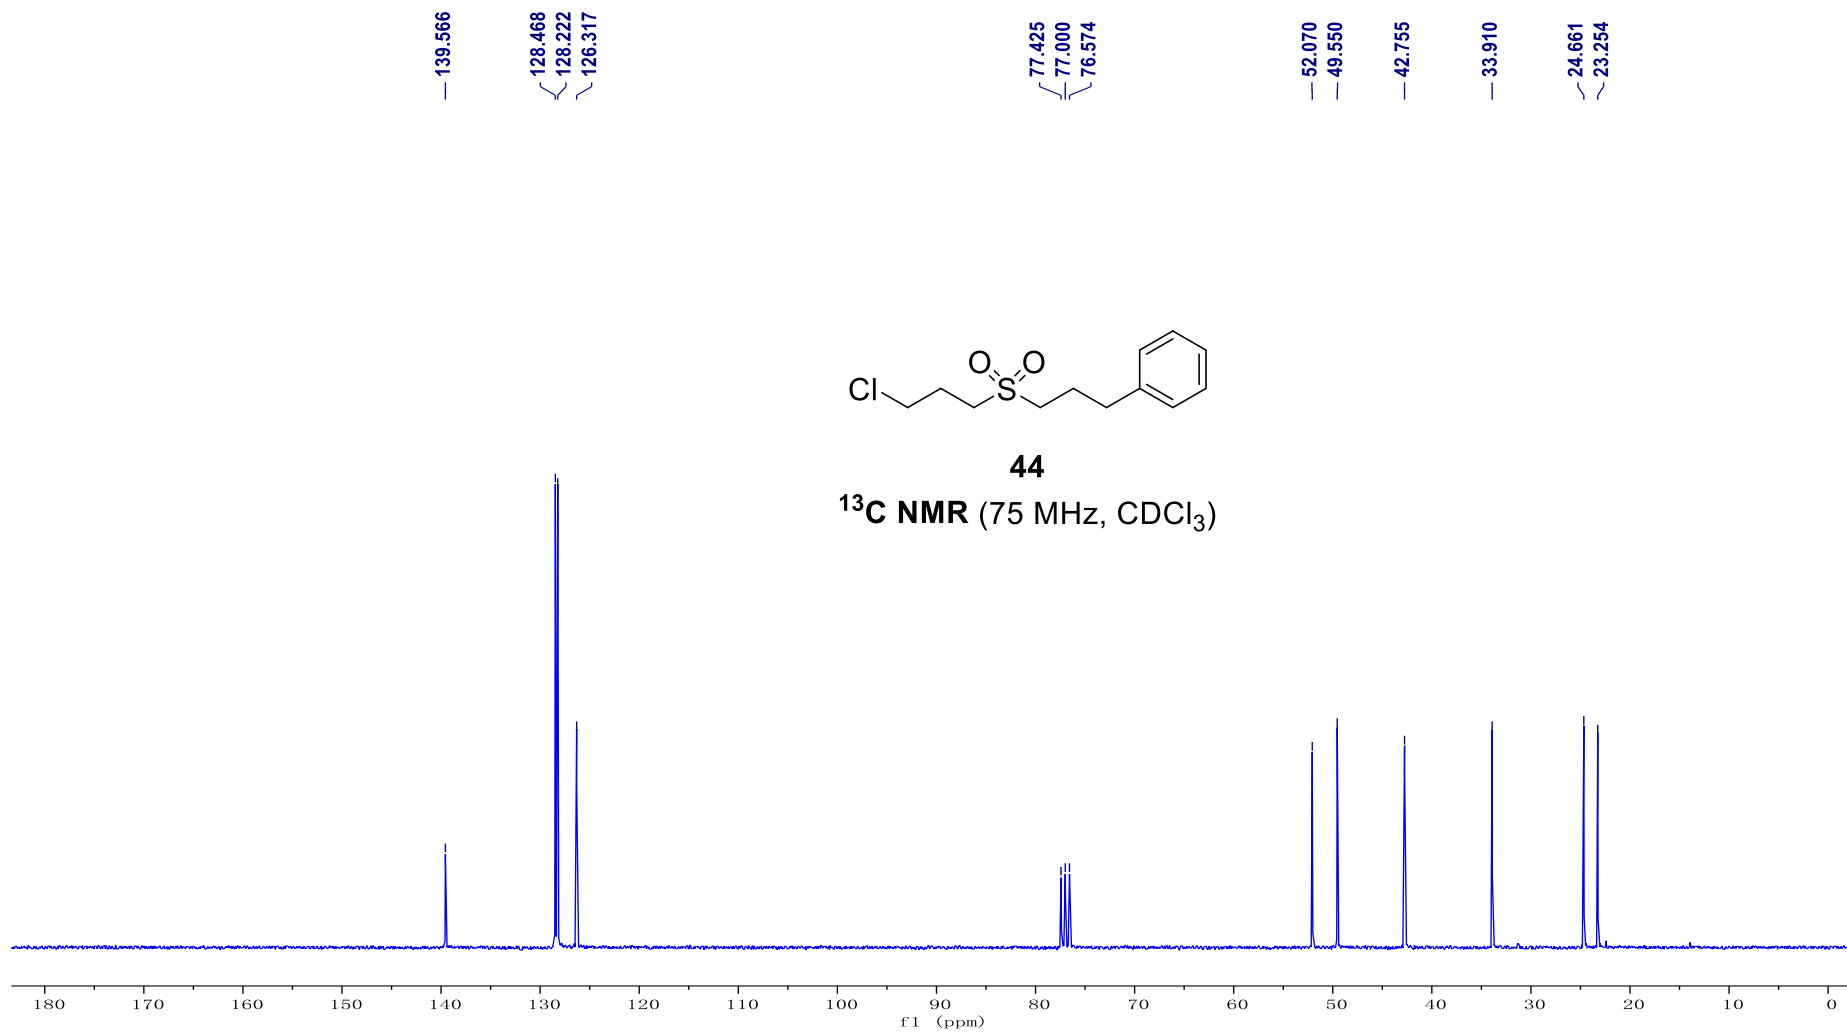

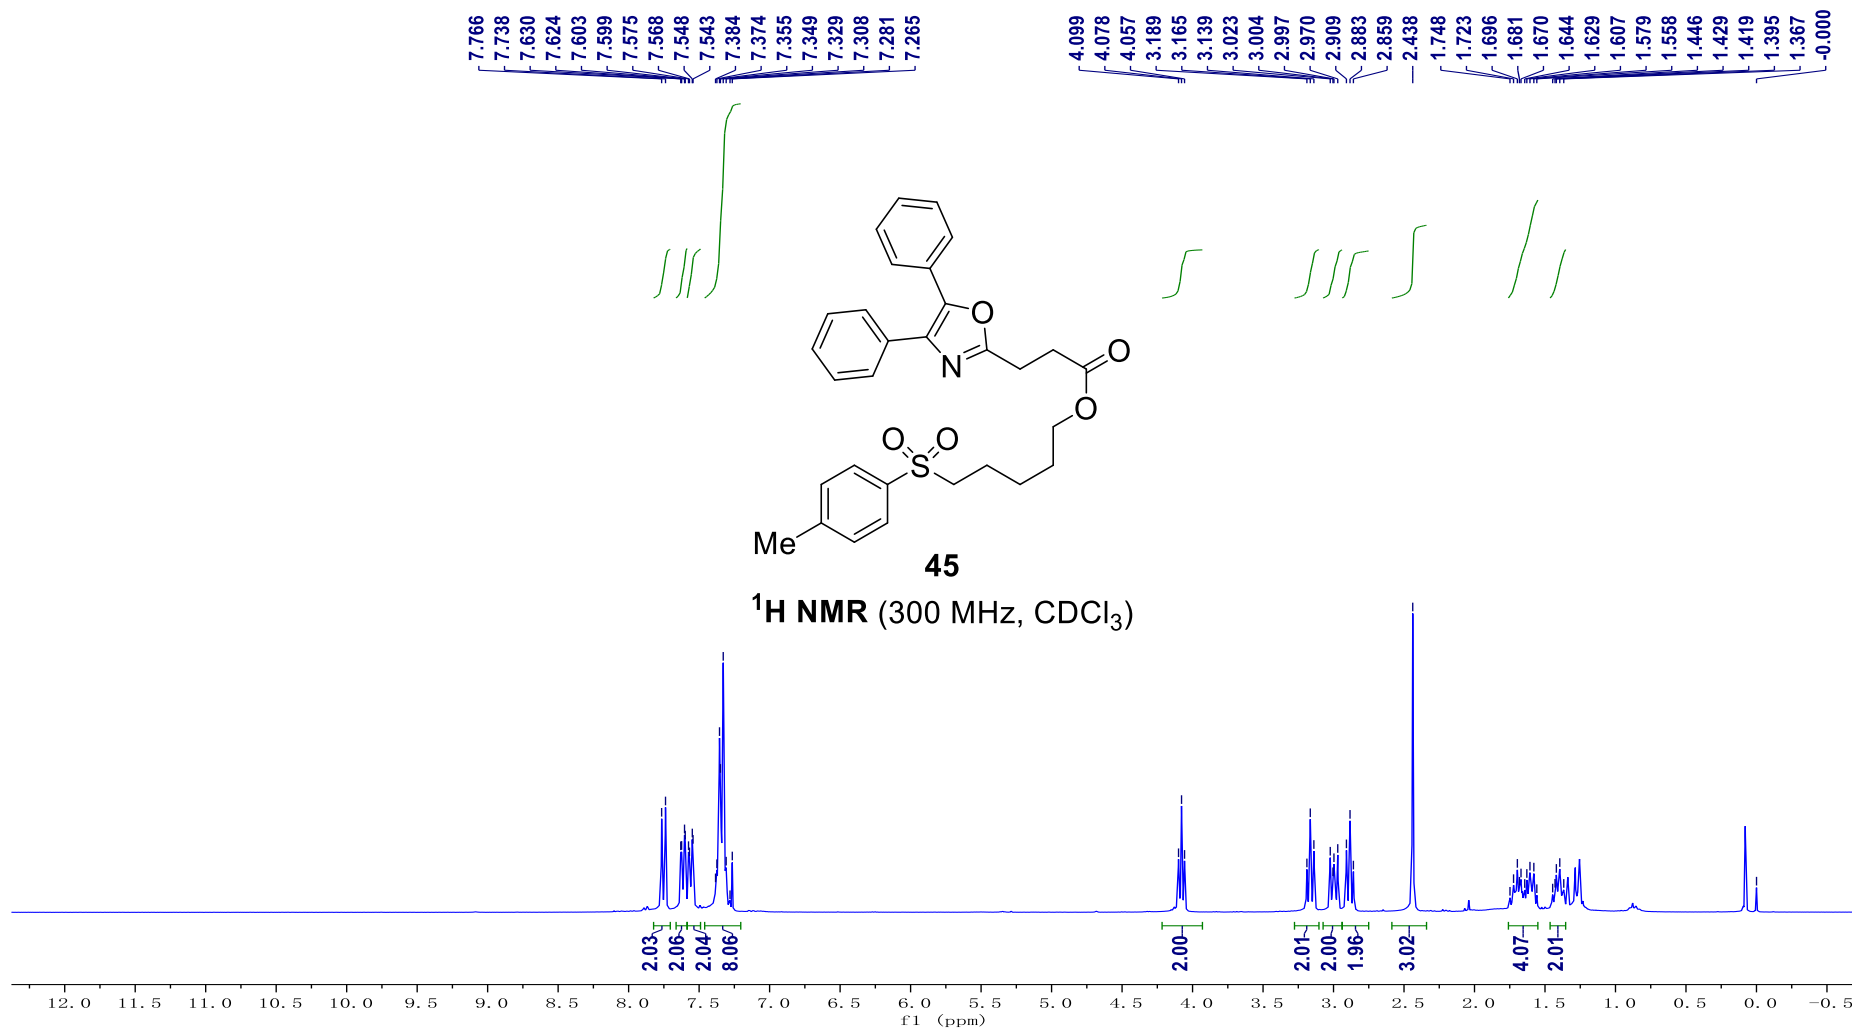

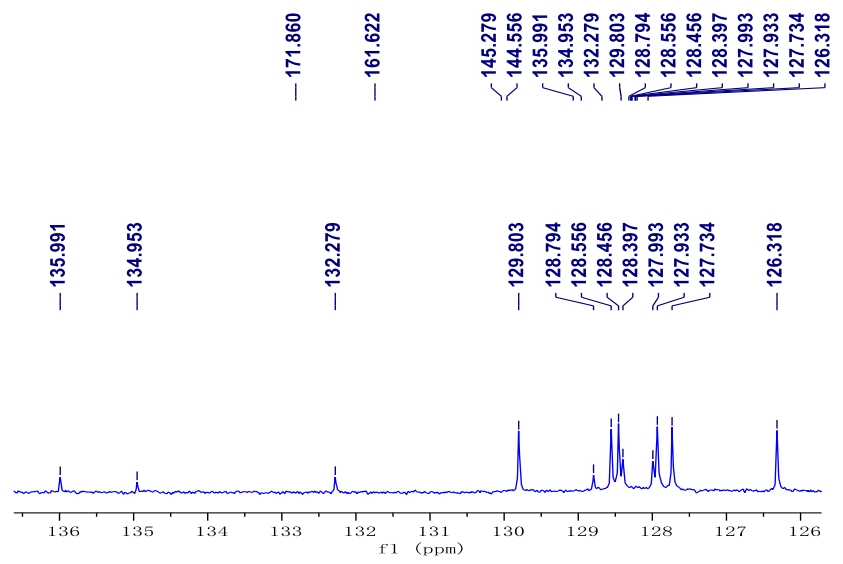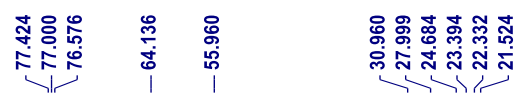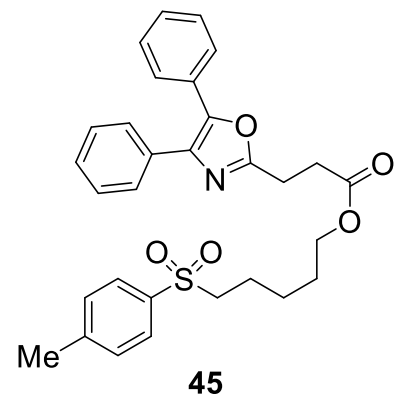

<sup>13</sup>C NMR (75 MHz, CDCl<sub>3</sub>)

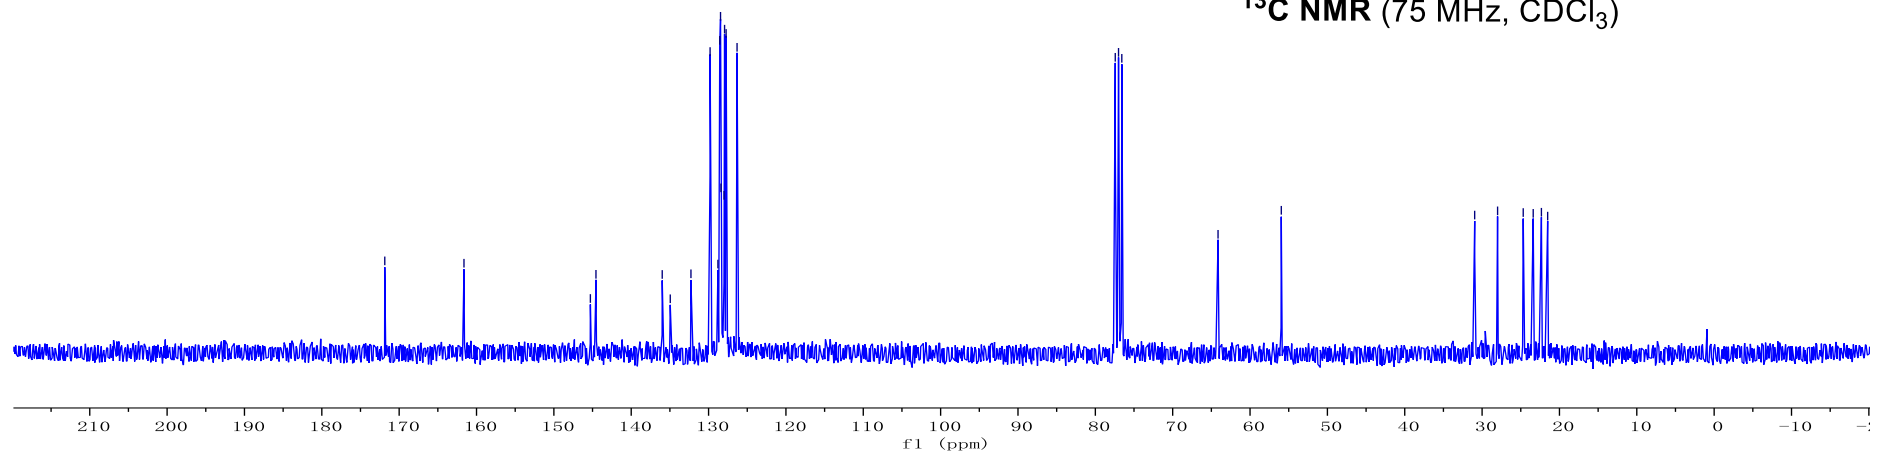

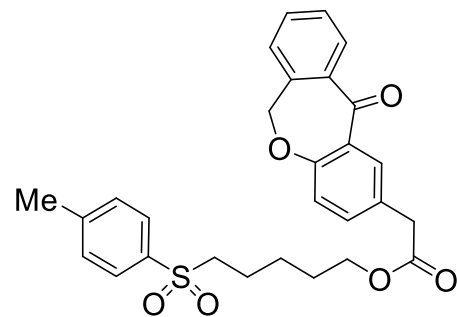

**46**

<sup>1</sup>H NMR (300 MHz, CDCl<sub>3</sub>)

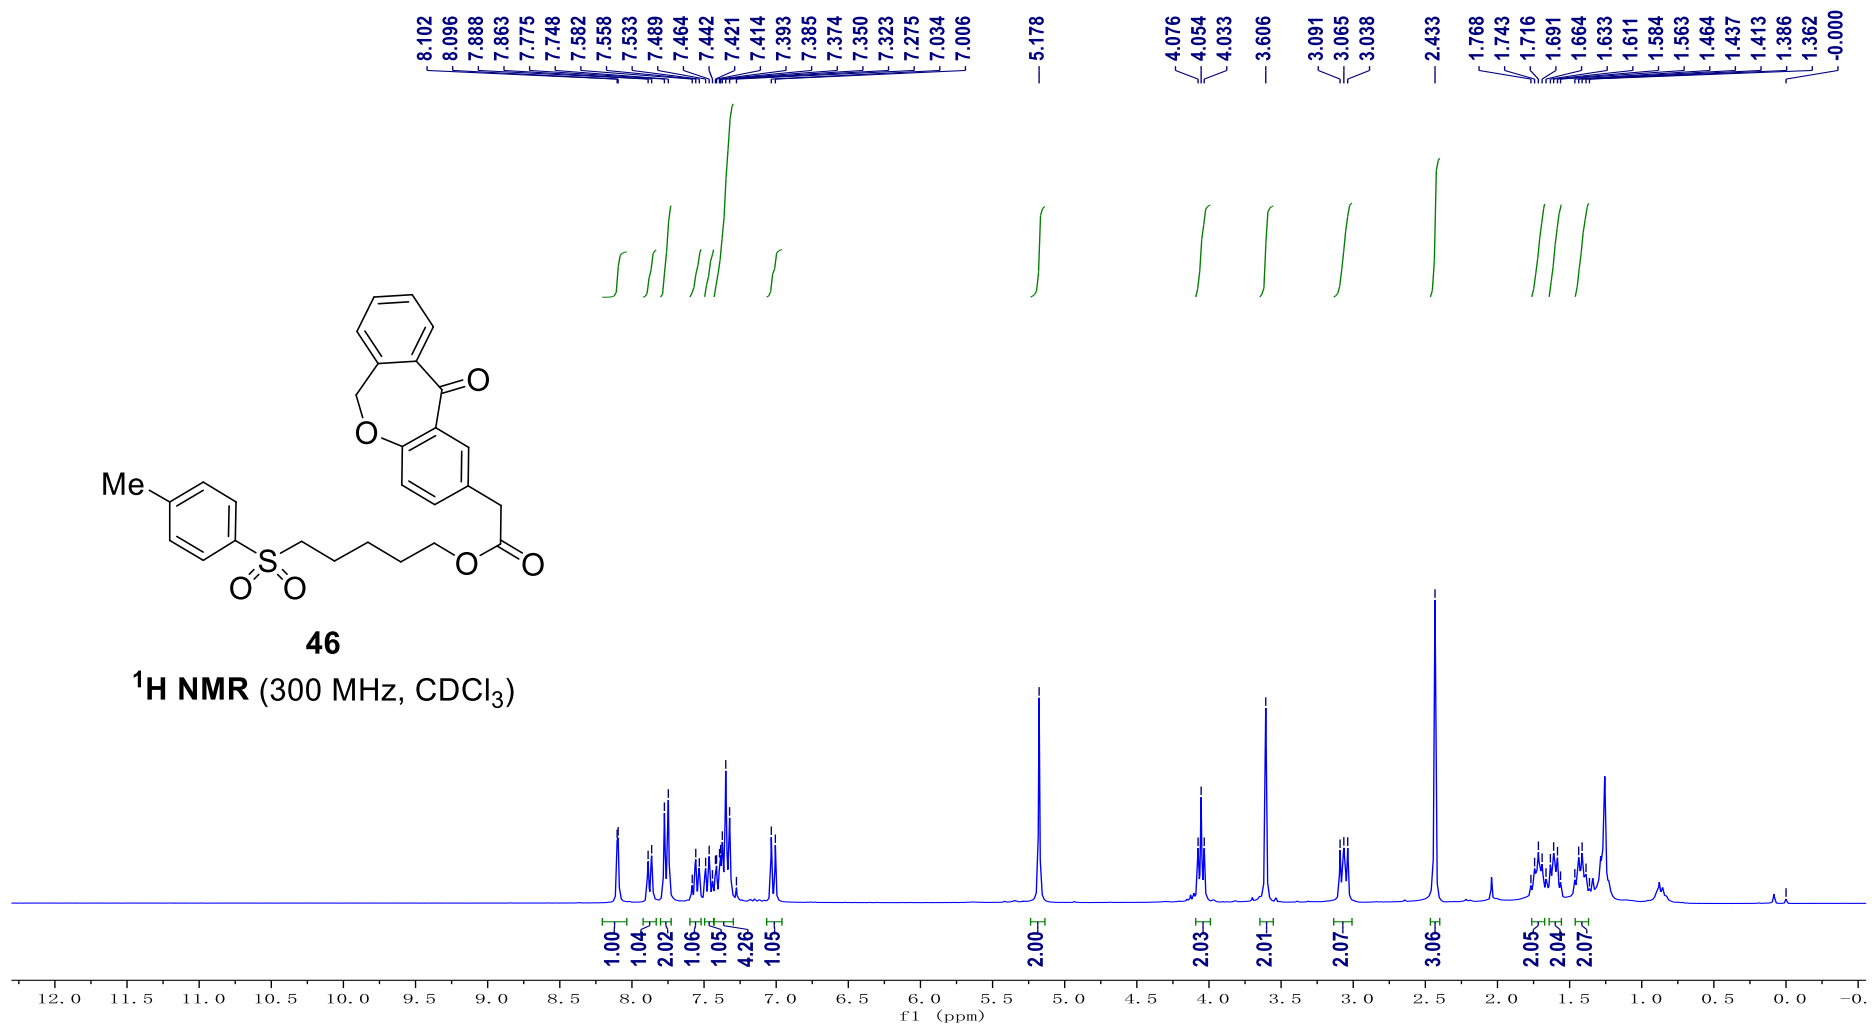

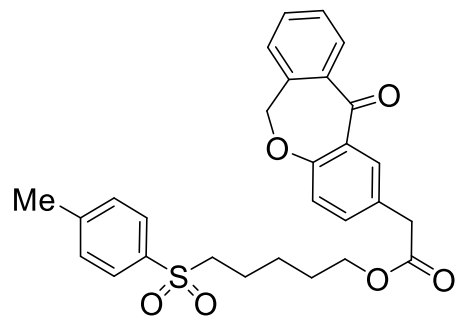

**46**

**<sup>13</sup>C NMR (75 MHz, CDCl<sub>3</sub>)**

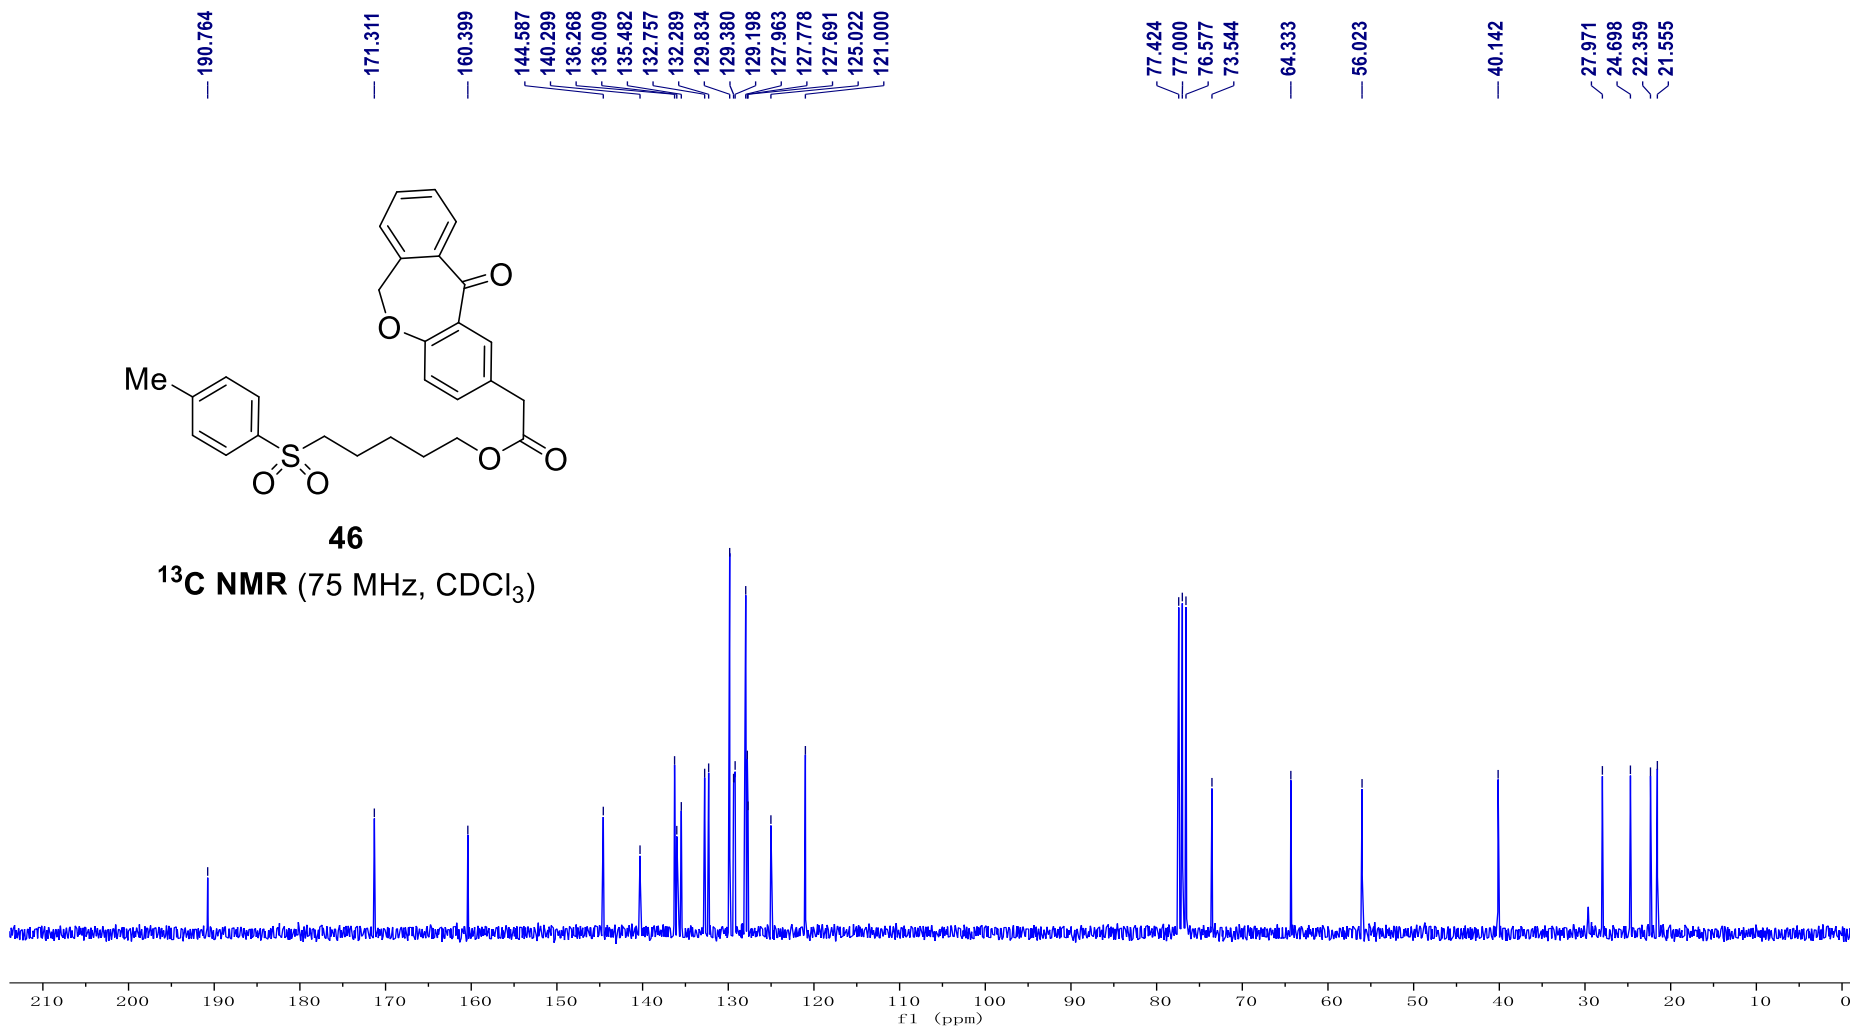

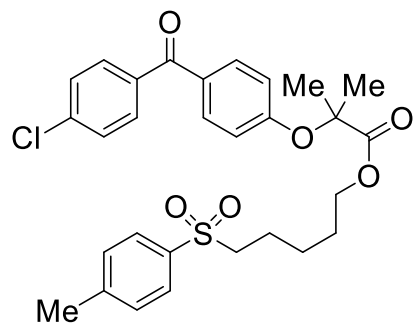

47

<sup>1</sup>H NMR (400 MHz, CDCl<sub>3</sub>)

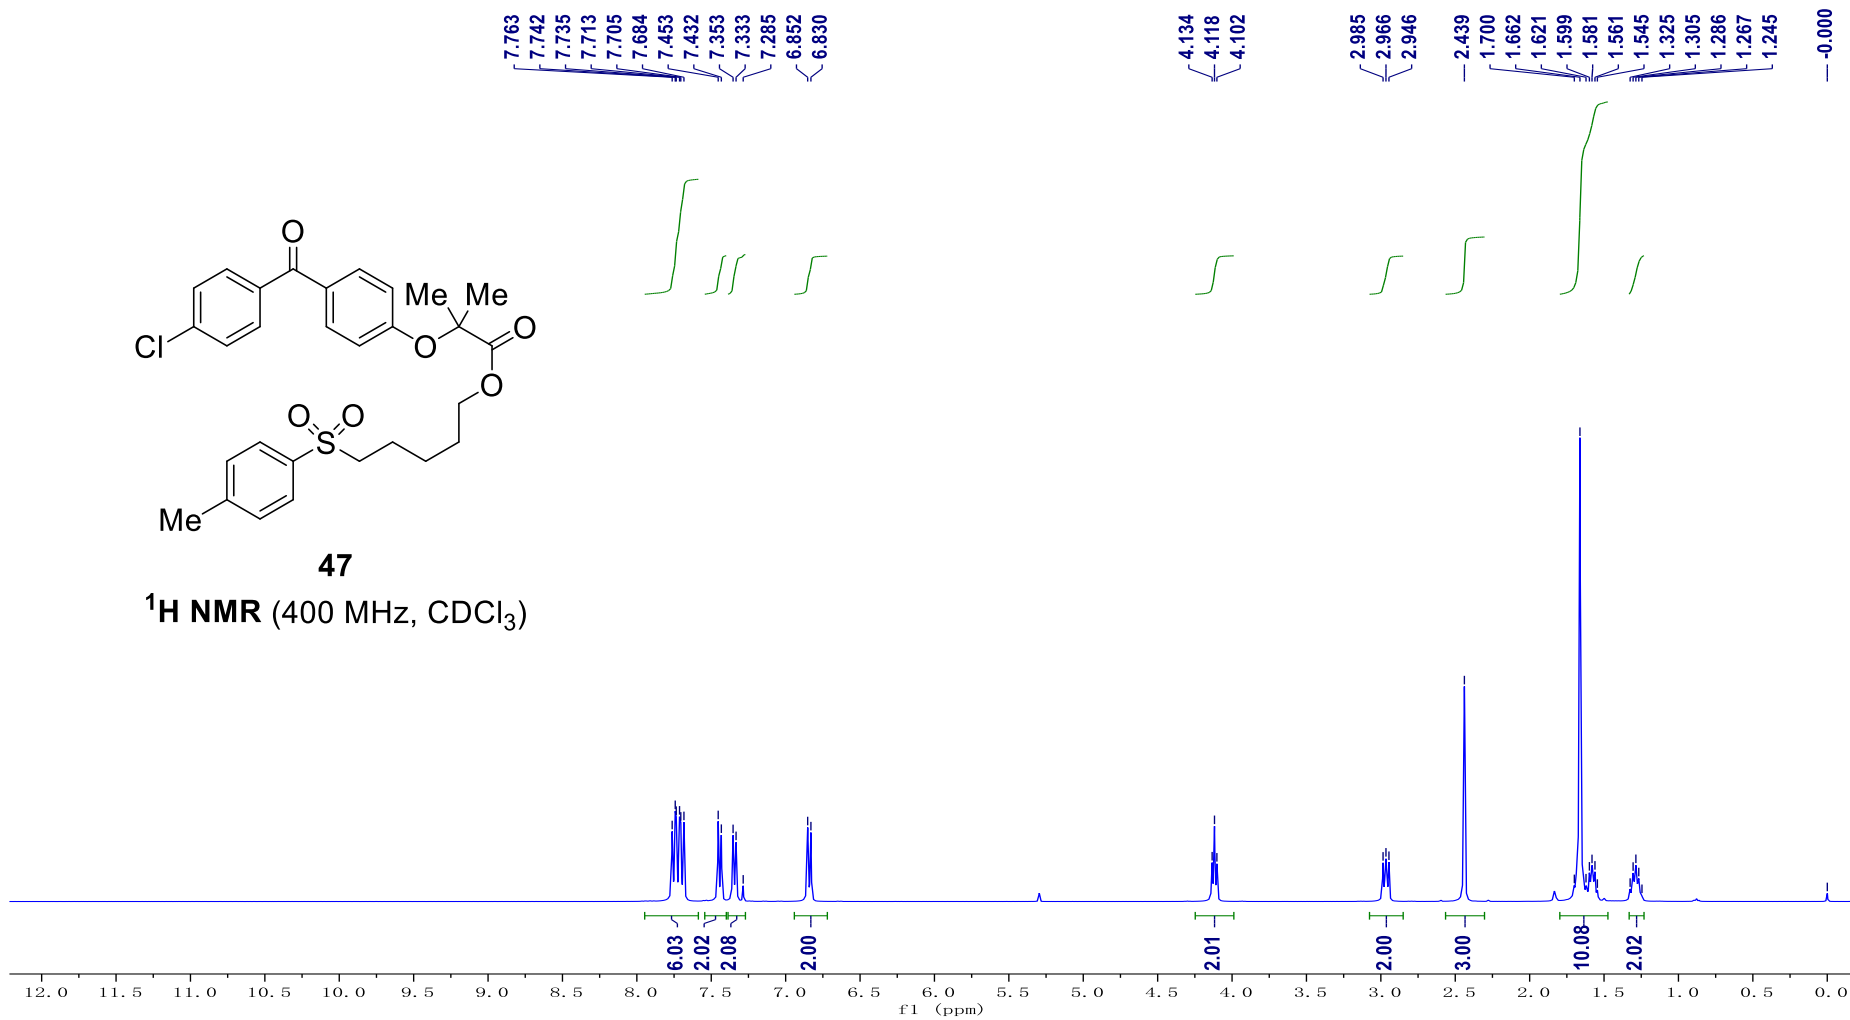



— 193.980  
 — 173.509  
 — 159.495  
 — 144.559  
 — 138.230  
 — 136.136  
 — 135.944  
 — 131.876  
 — 131.035  
 — 130.155  
 — 129.788  
 — 128.420  
 — 127.857  
 — 116.952  
 — 79.210  
 — 77.425  
 — 77.000  
 — 76.576  
 — 64.989  
 — 55.834  
 — 27.764  
 — 25.273  
 — 24.479  
 — 22.150  
 — 21.497

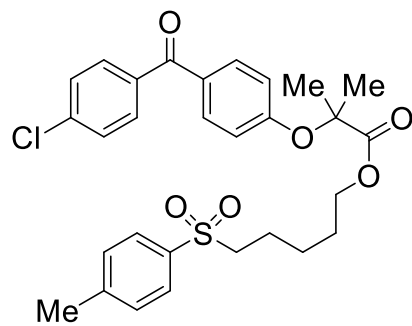

**47**

**<sup>13</sup>C NMR (75 MHz, CDCl<sub>3</sub>)**

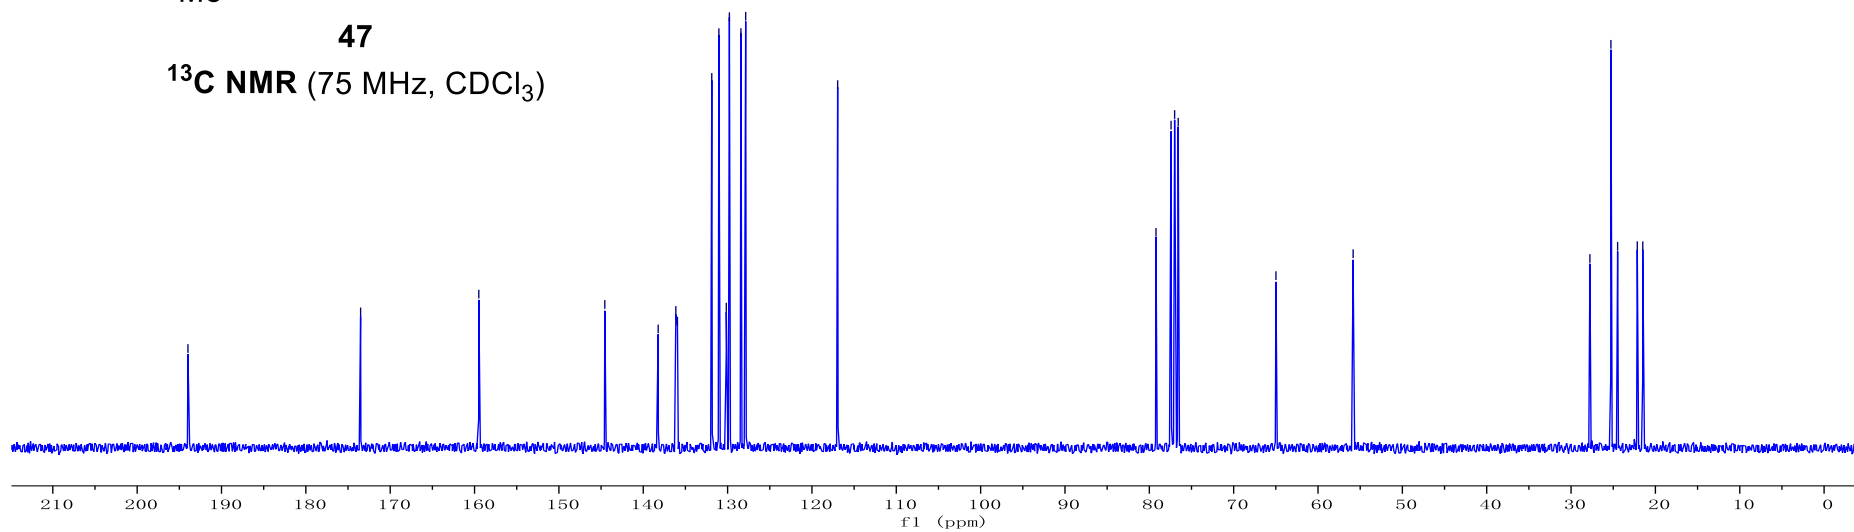

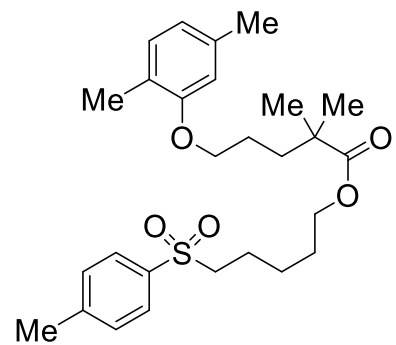

**48**

<sup>1</sup>H NMR (300 MHz, CDCl<sub>3</sub>)

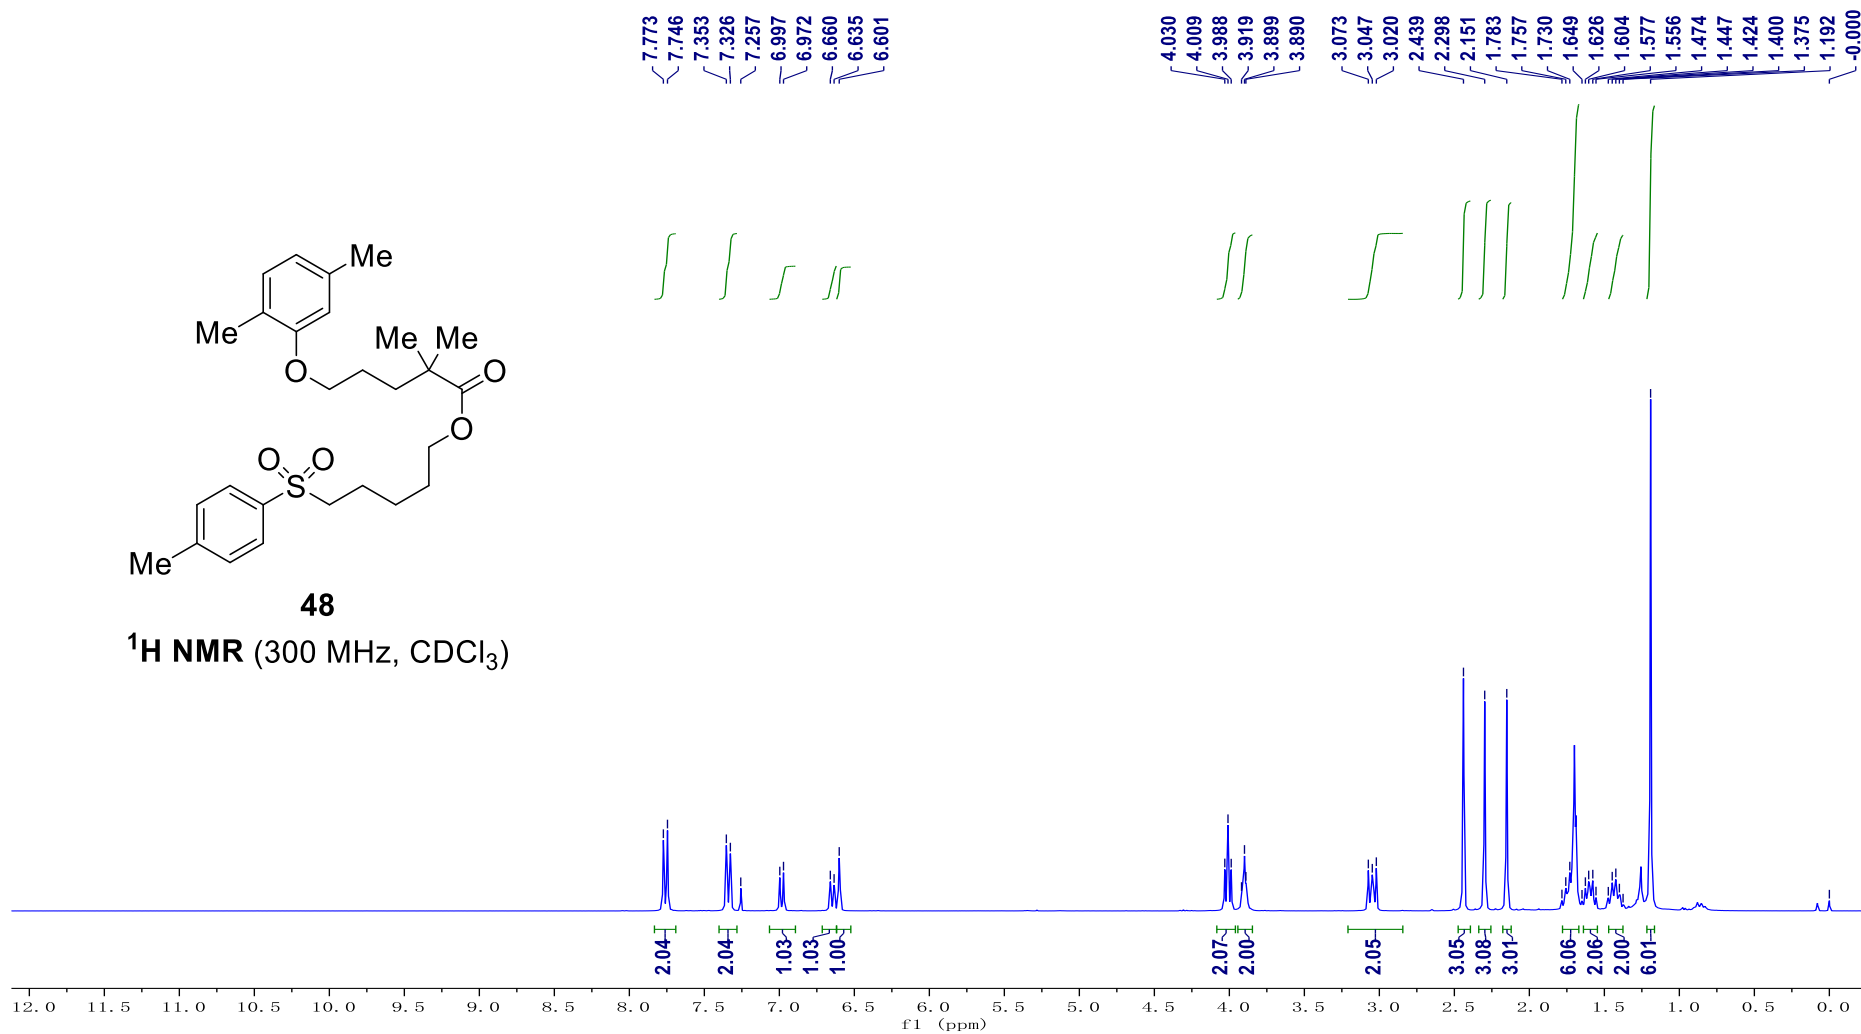

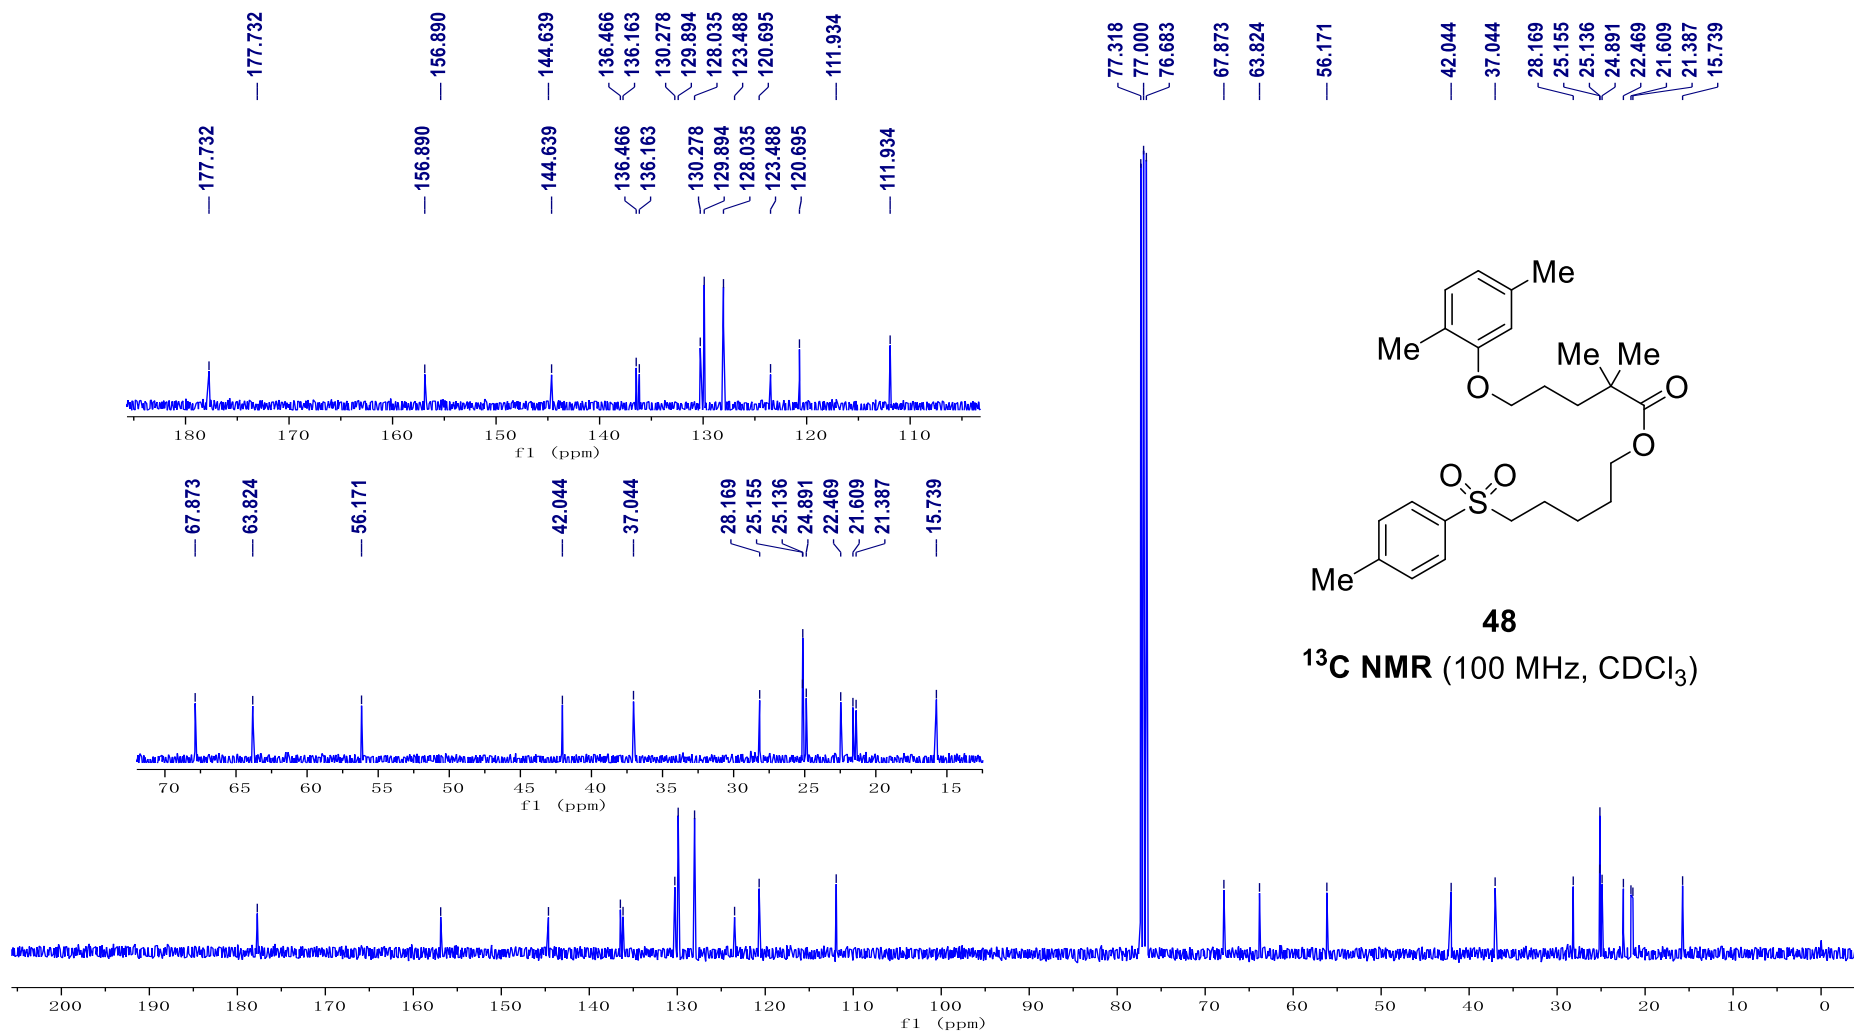

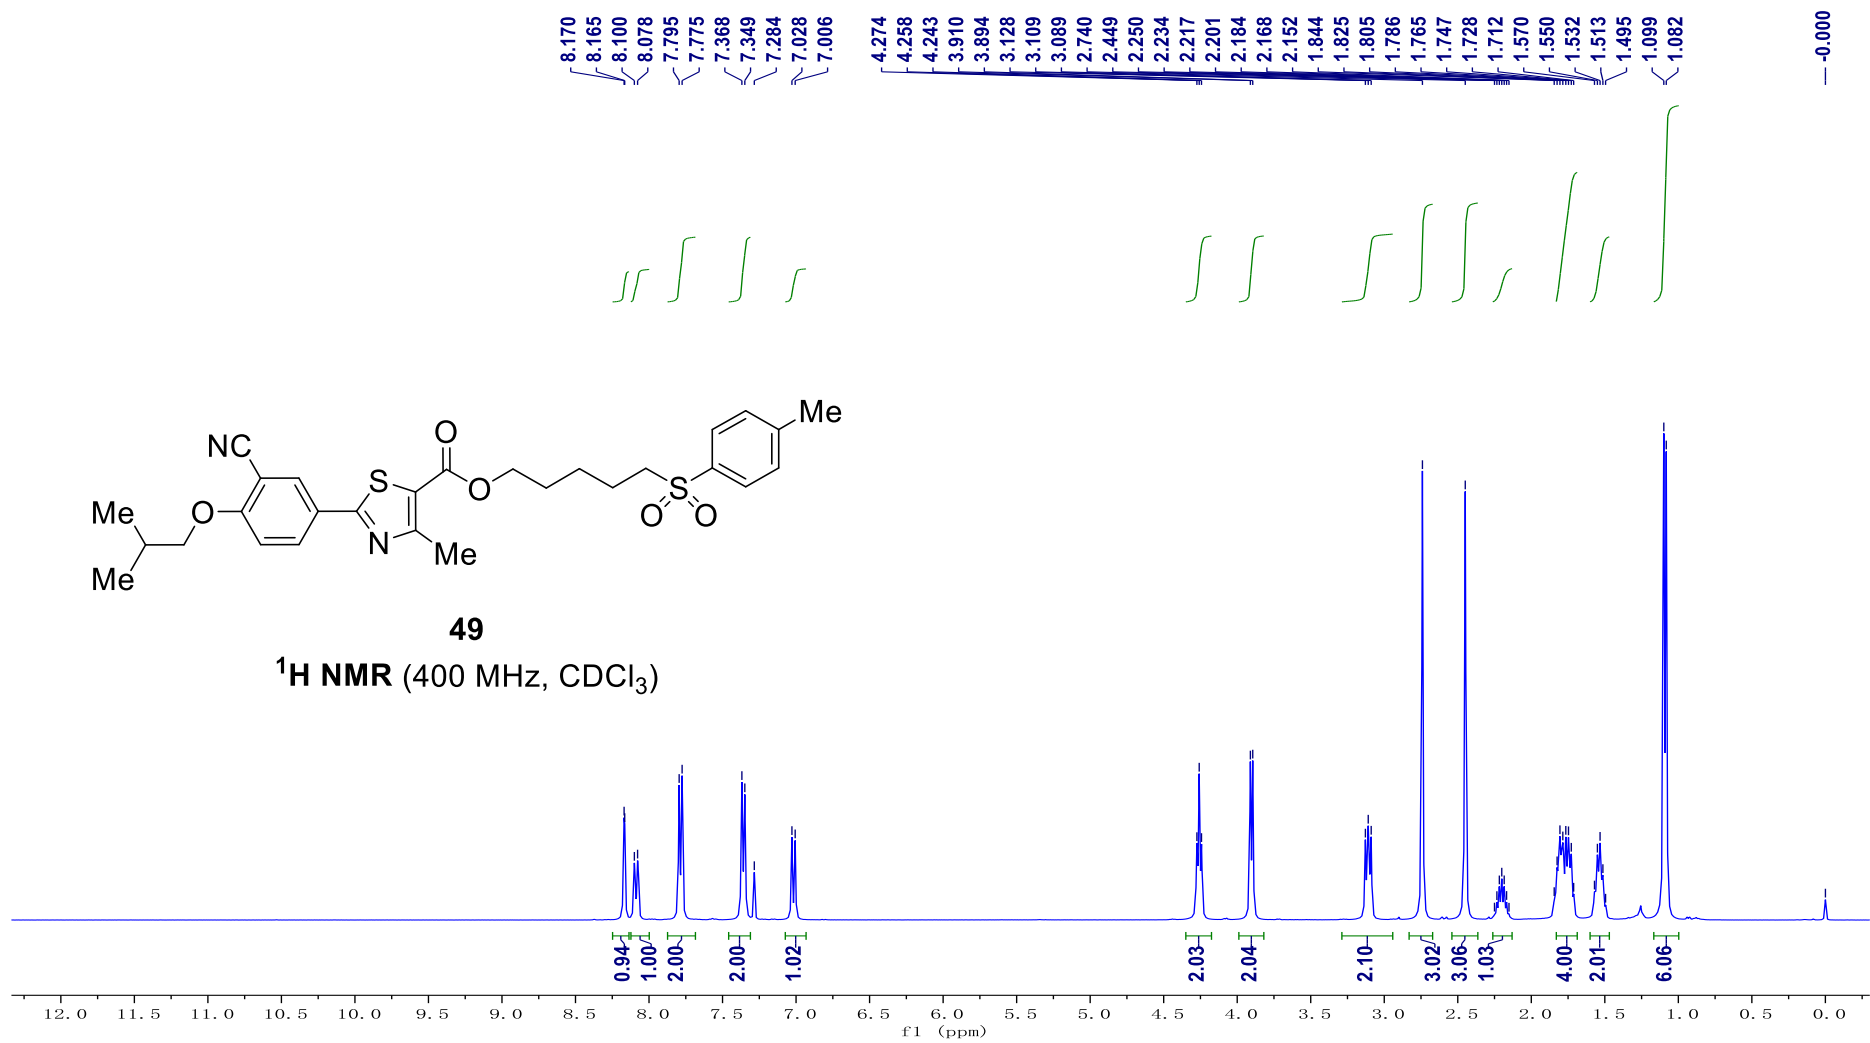

167.124  
162.365  
161.782  
161.112

144.619

135.956  
132.488  
131.856  
129.810  
127.898  
125.734  
121.387

115.274  
112.538

102.728

77.424  
77.000  
76.575  
75.533

64.641

56.041

28.068  
28.004  
24.822  
22.379  
21.510  
18.916  
17.347

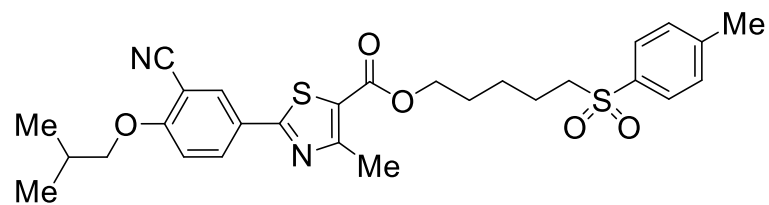

49

<sup>13</sup>C NMR (75 MHz, CDCl<sub>3</sub>)

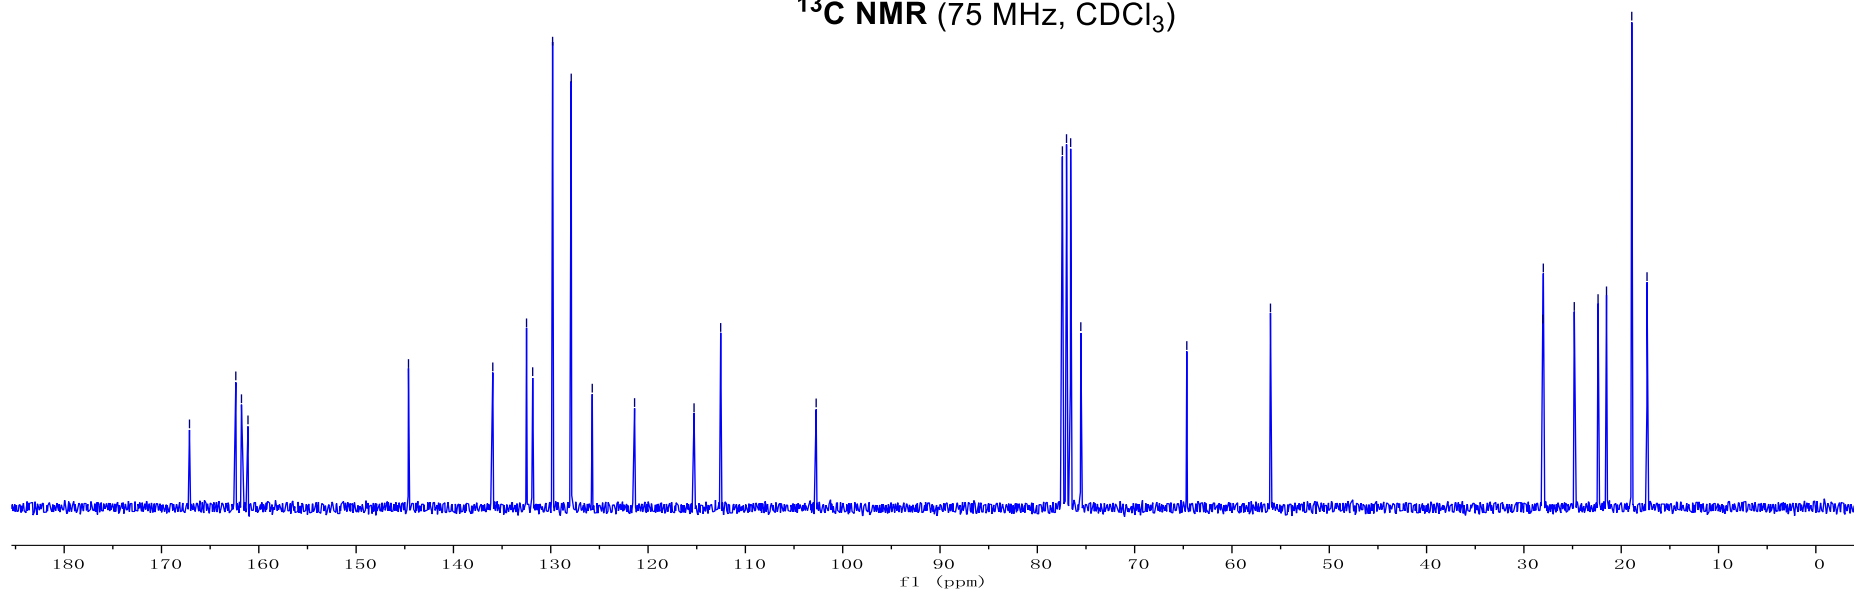

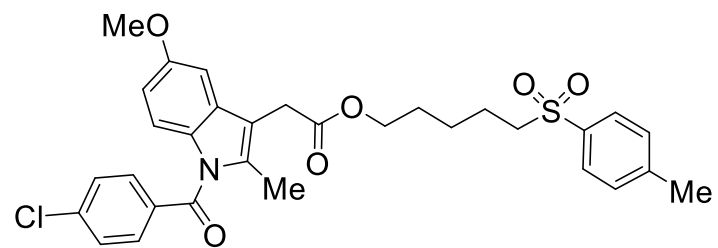

**50**

**<sup>1</sup>H NMR (400 MHz, CDCl<sub>3</sub>)**

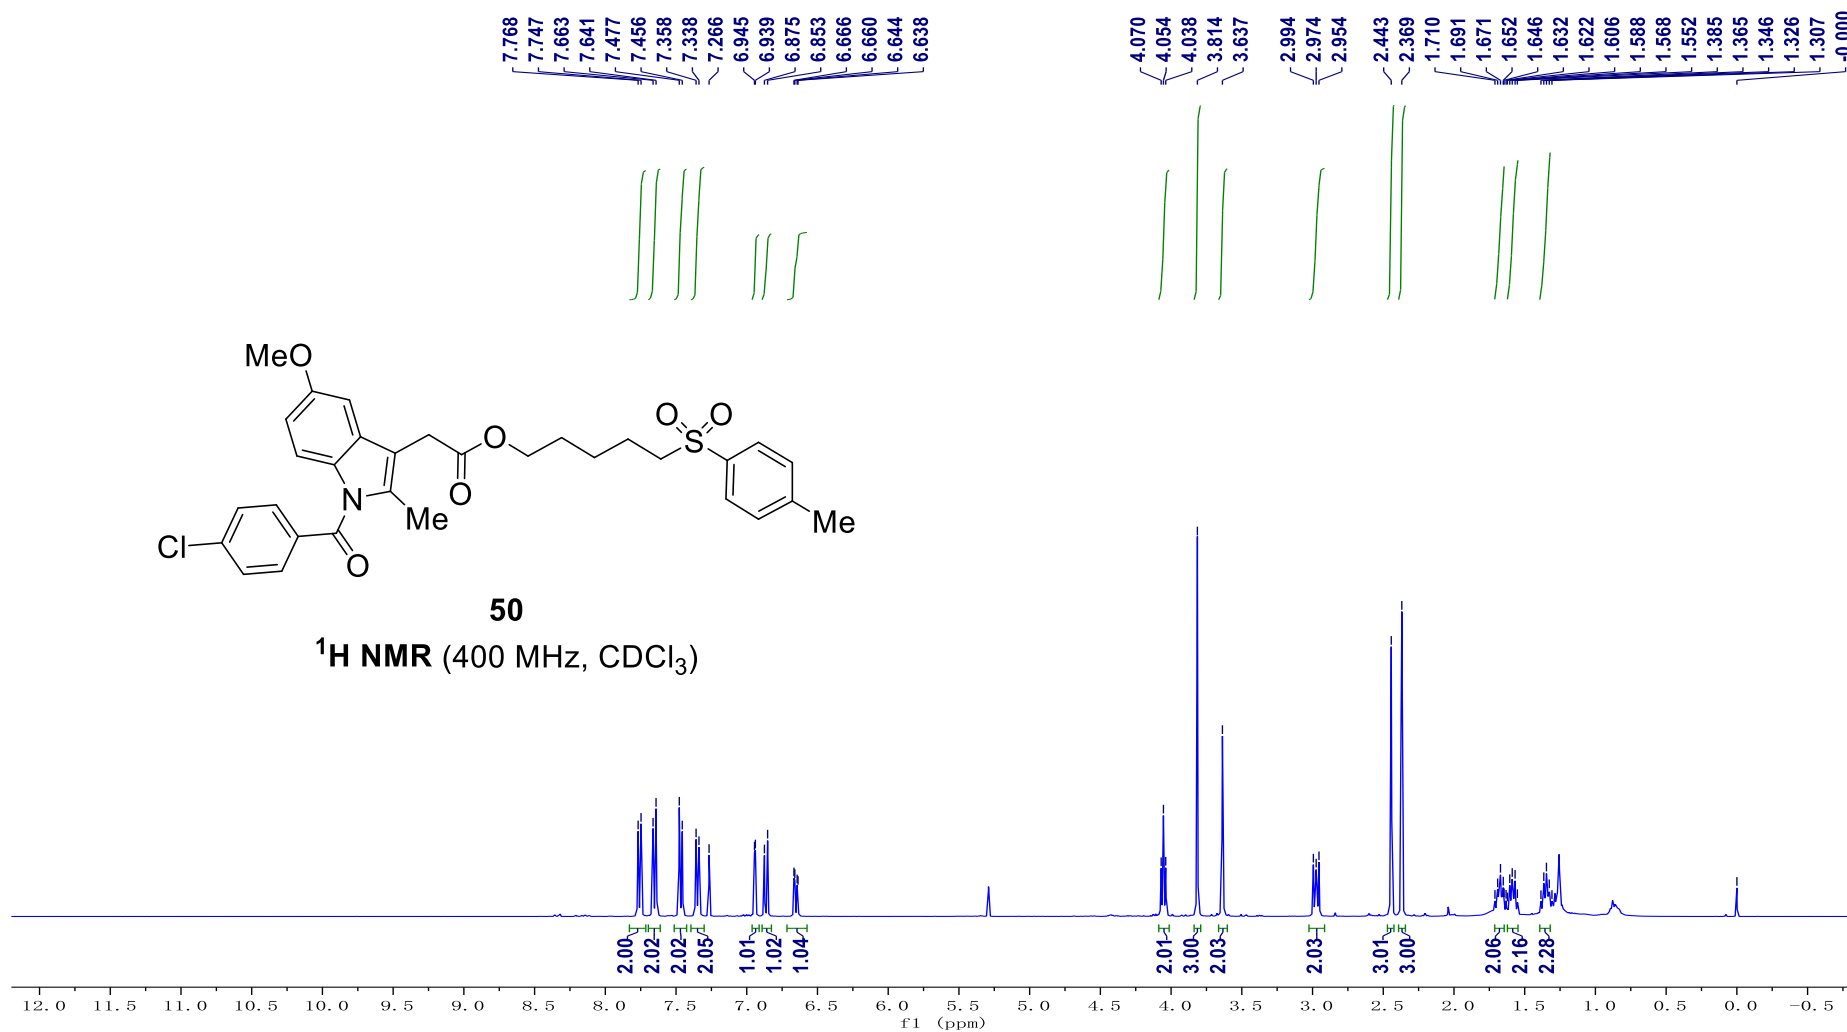

— 170.776  
 — 168.239  
 — 155.902  
 — 144.633  
 / 139.219  
 / 136.048  
 / 135.884  
 / 133.782  
 / 131.113  
 / 130.724  
 / 130.552  
 / 129.857  
 / 129.075  
 / 127.965  
 / 114.881  
 / 112.498  
 / 111.341  
 — 101.431

/ 77.424  
 / 77.000  
 / 76.576

— 64.330

/ 55.963  
 / 55.646

/ 30.308  
 / 28.033  
 / 24.664  
 / 22.288  
 / 21.577

— 13.304

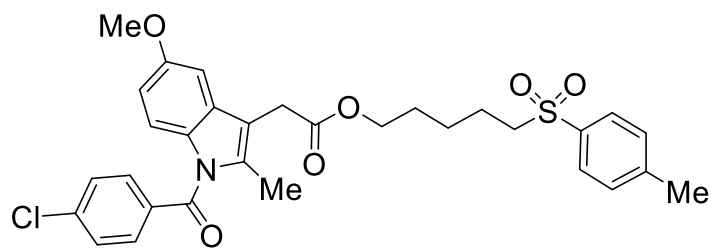

**50**

**<sup>13</sup>C NMR (75 MHz, CDCl<sub>3</sub>)**

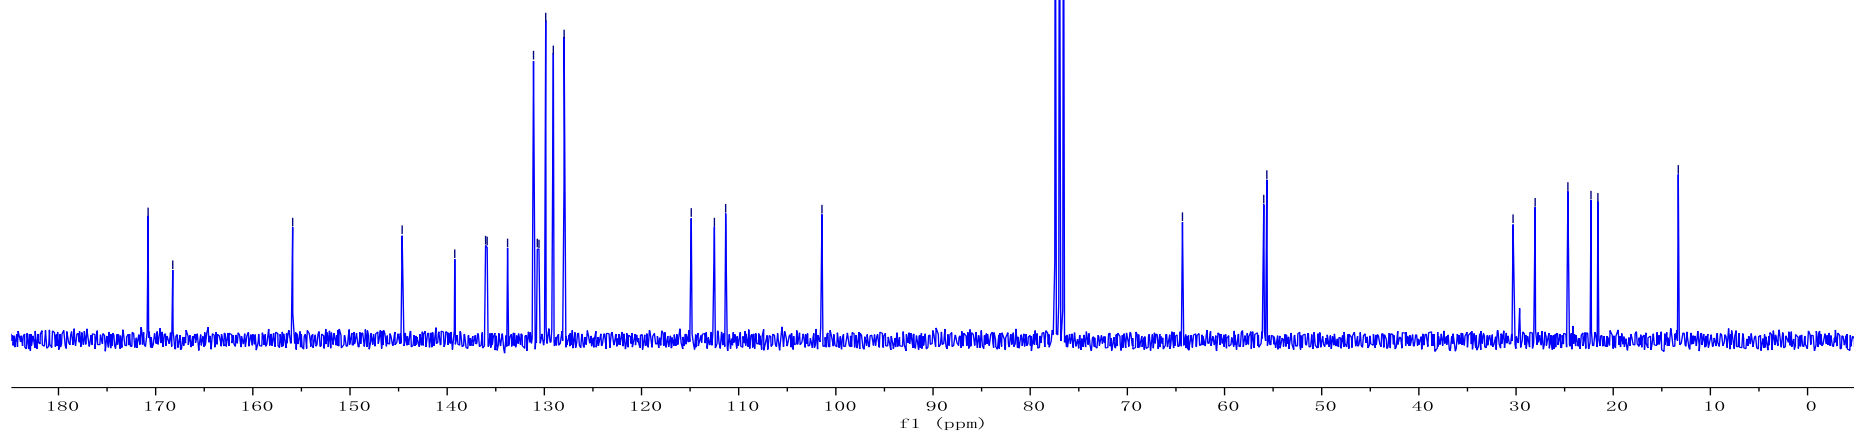

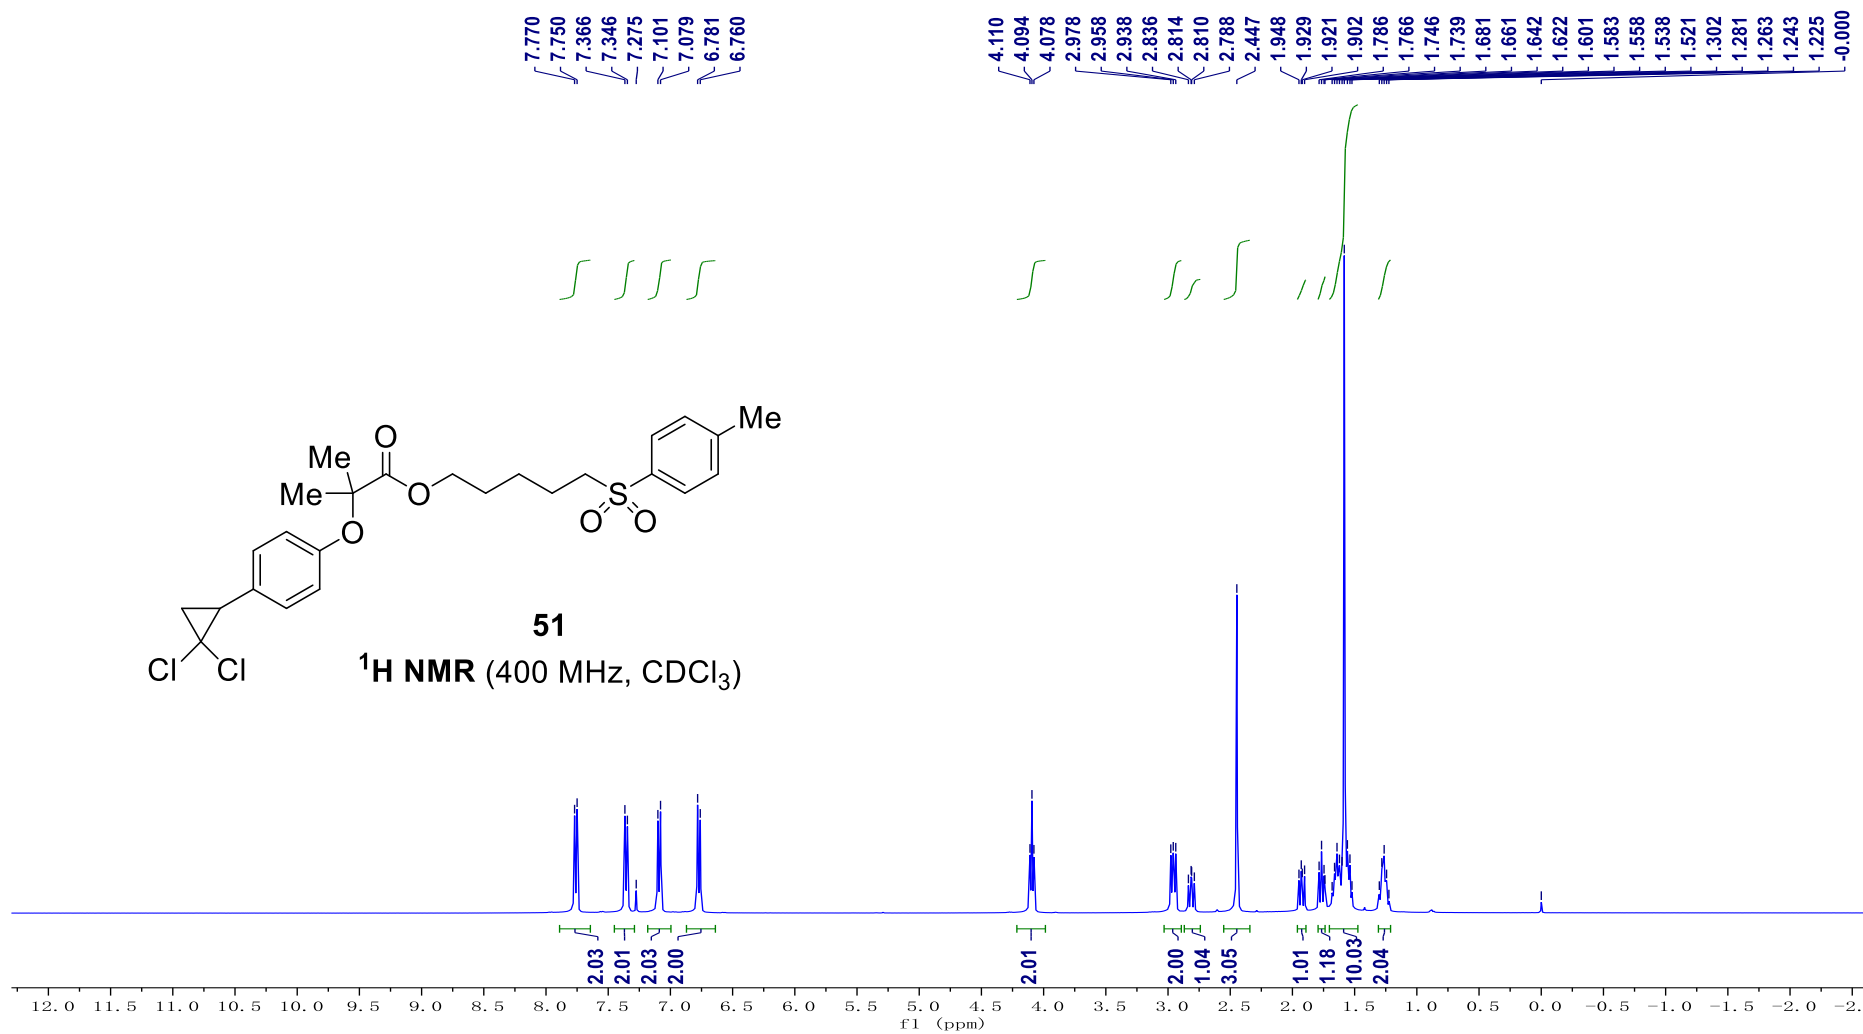



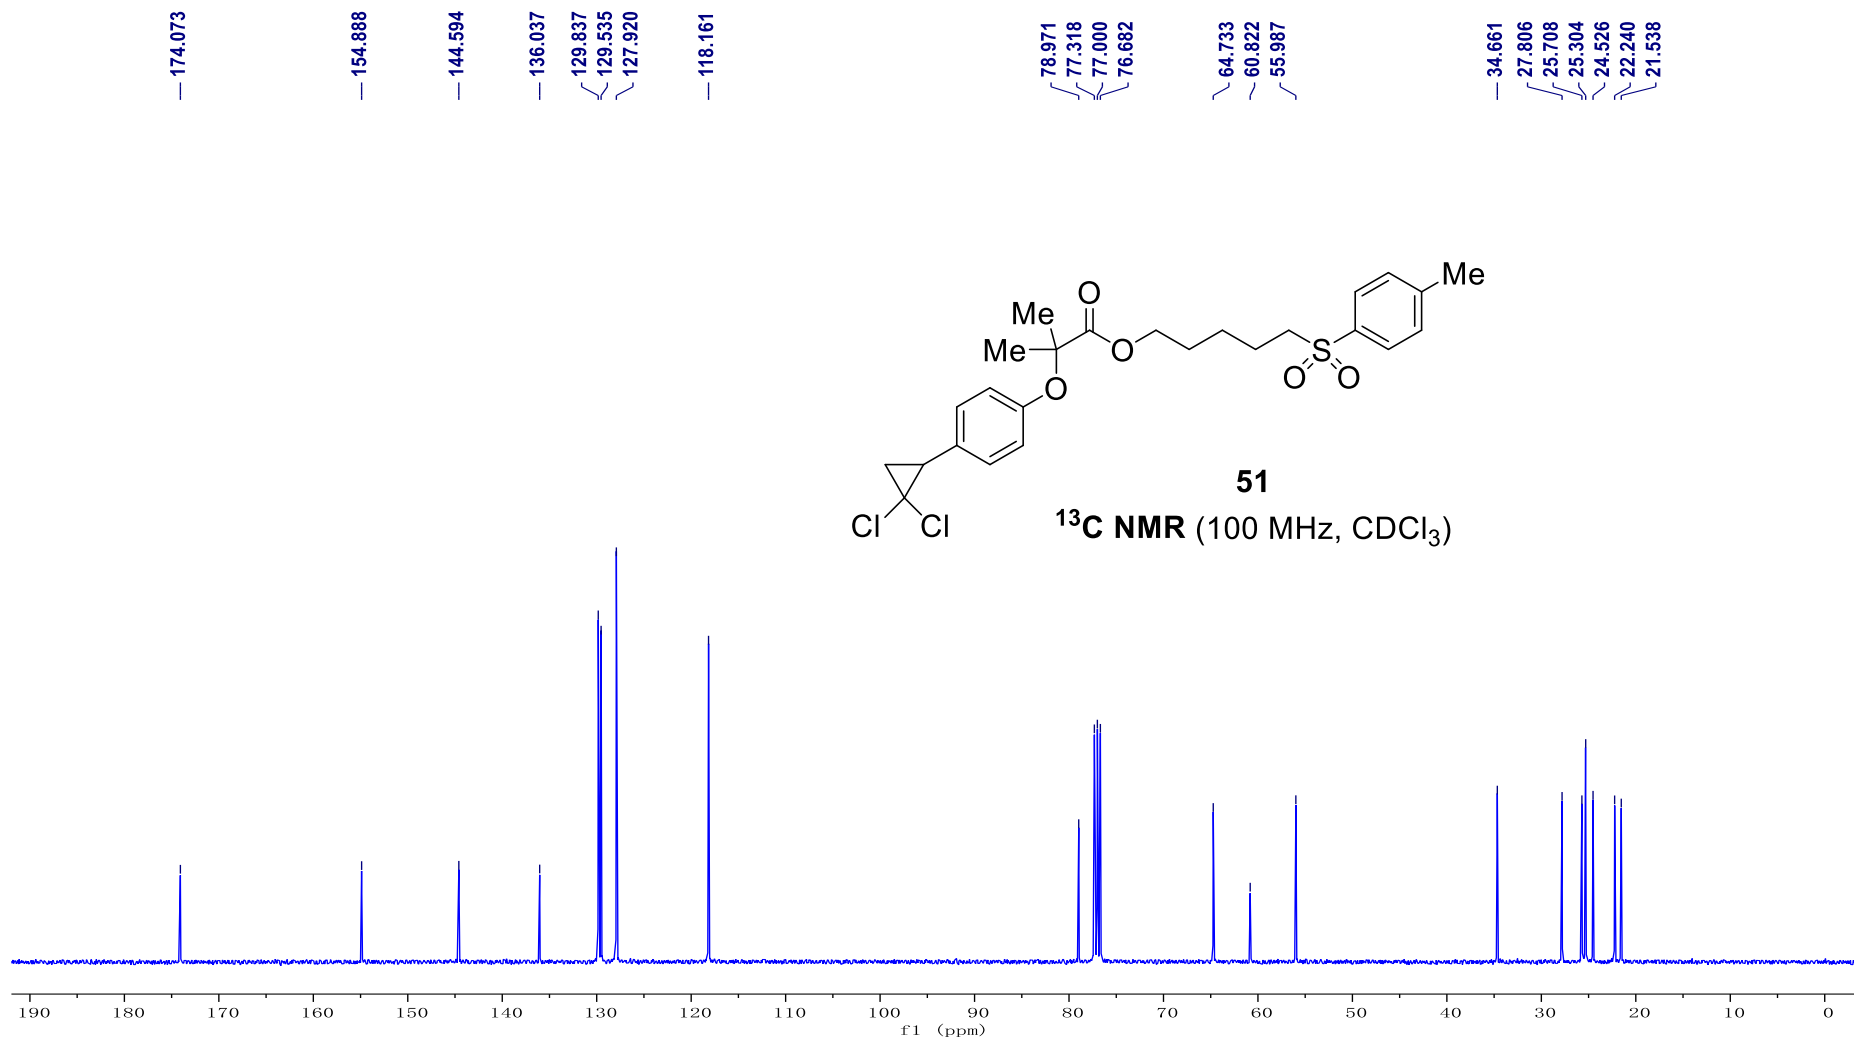

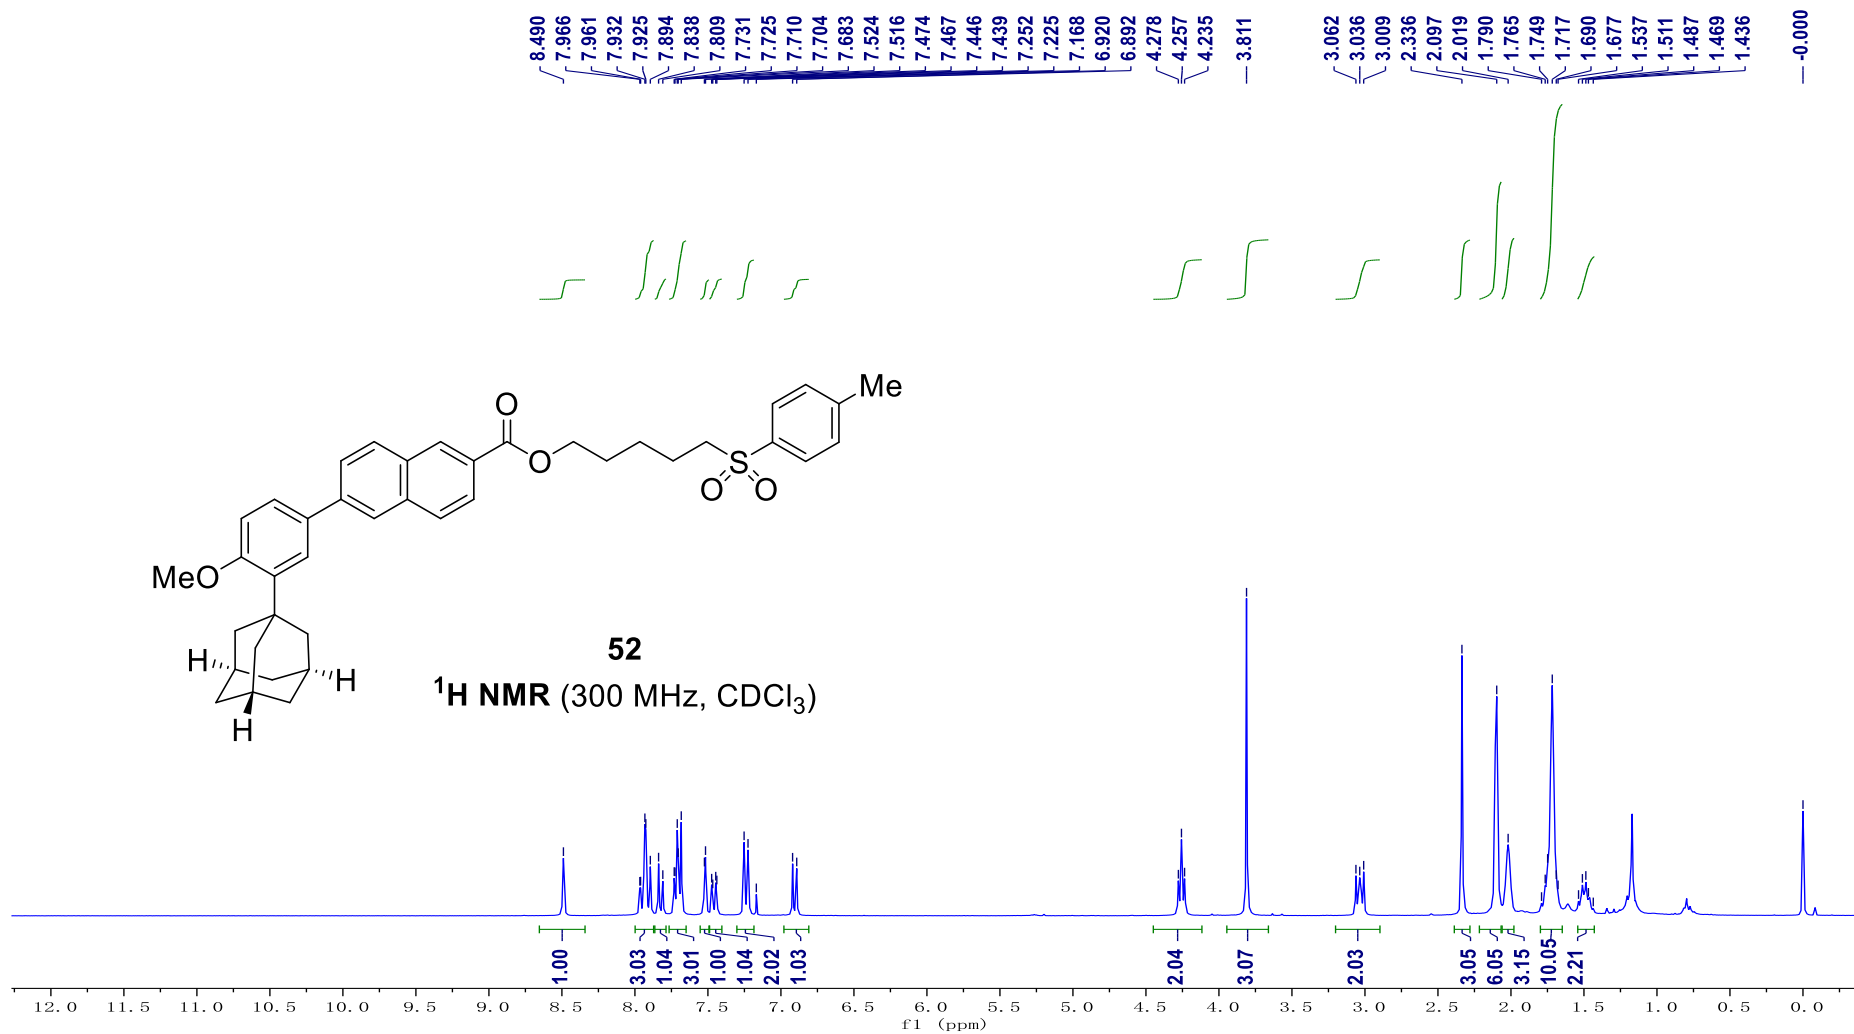

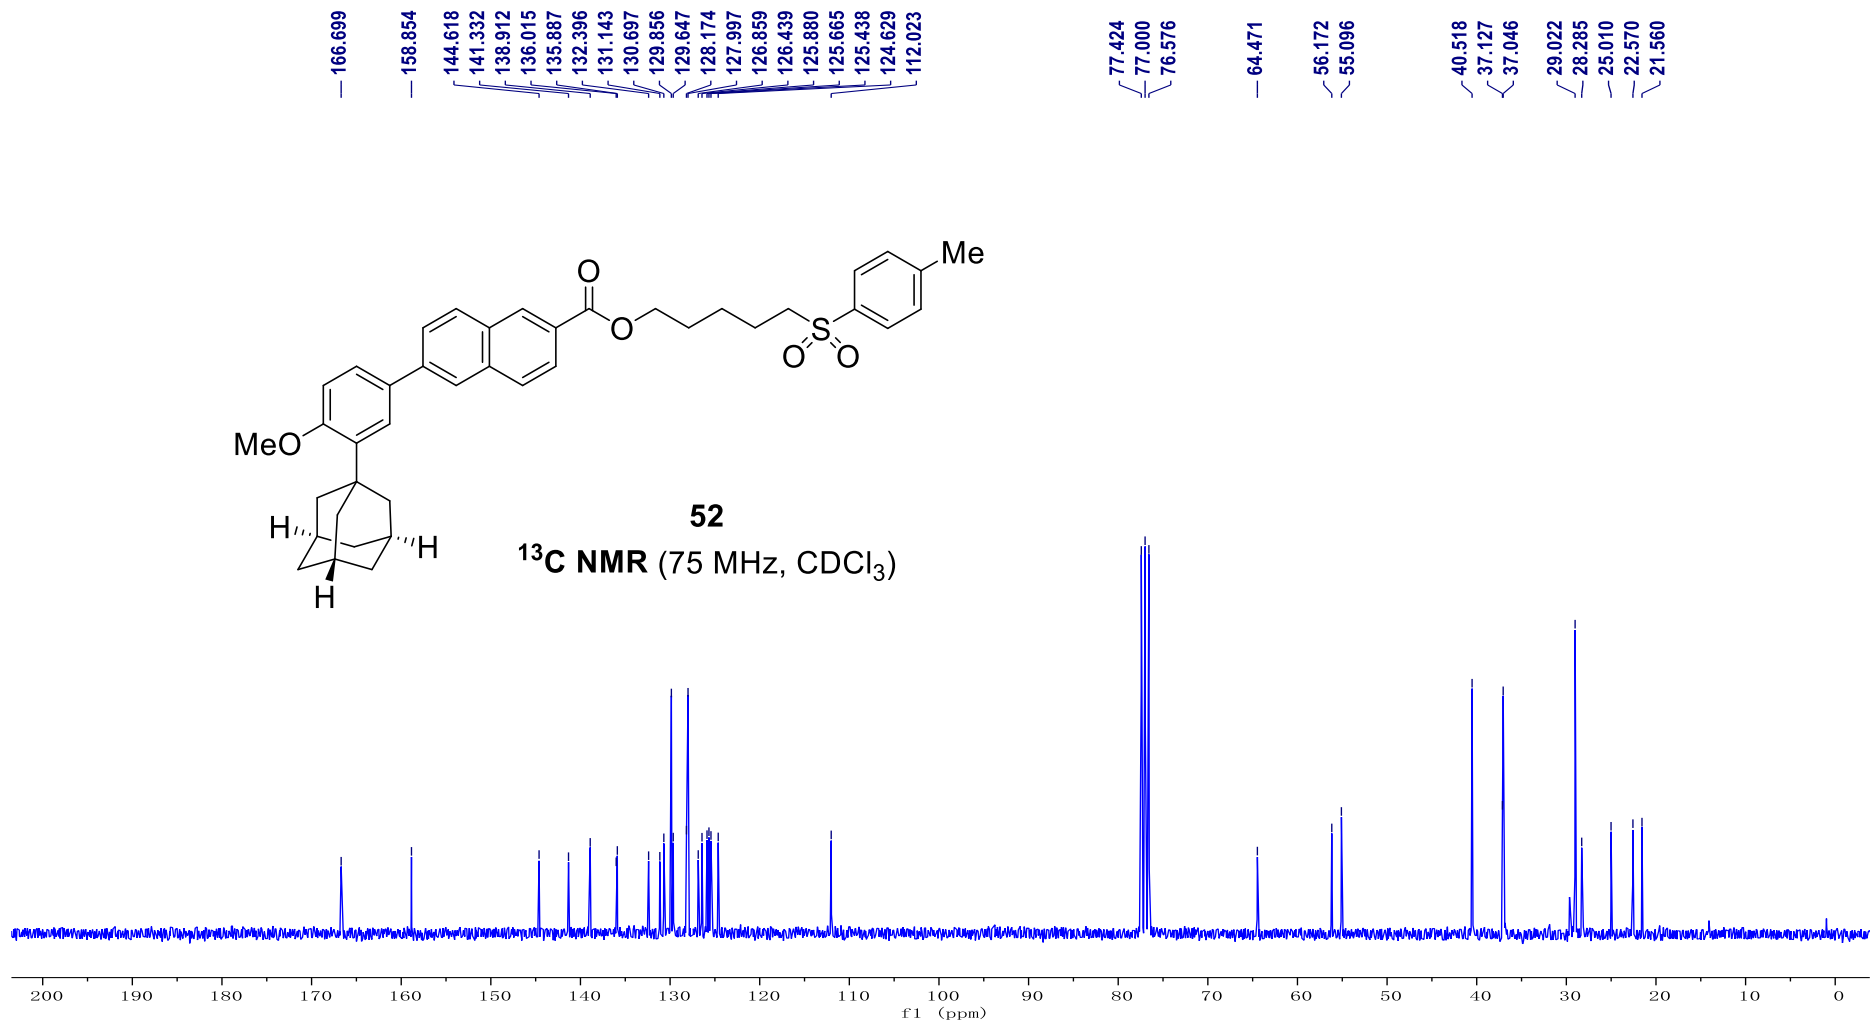

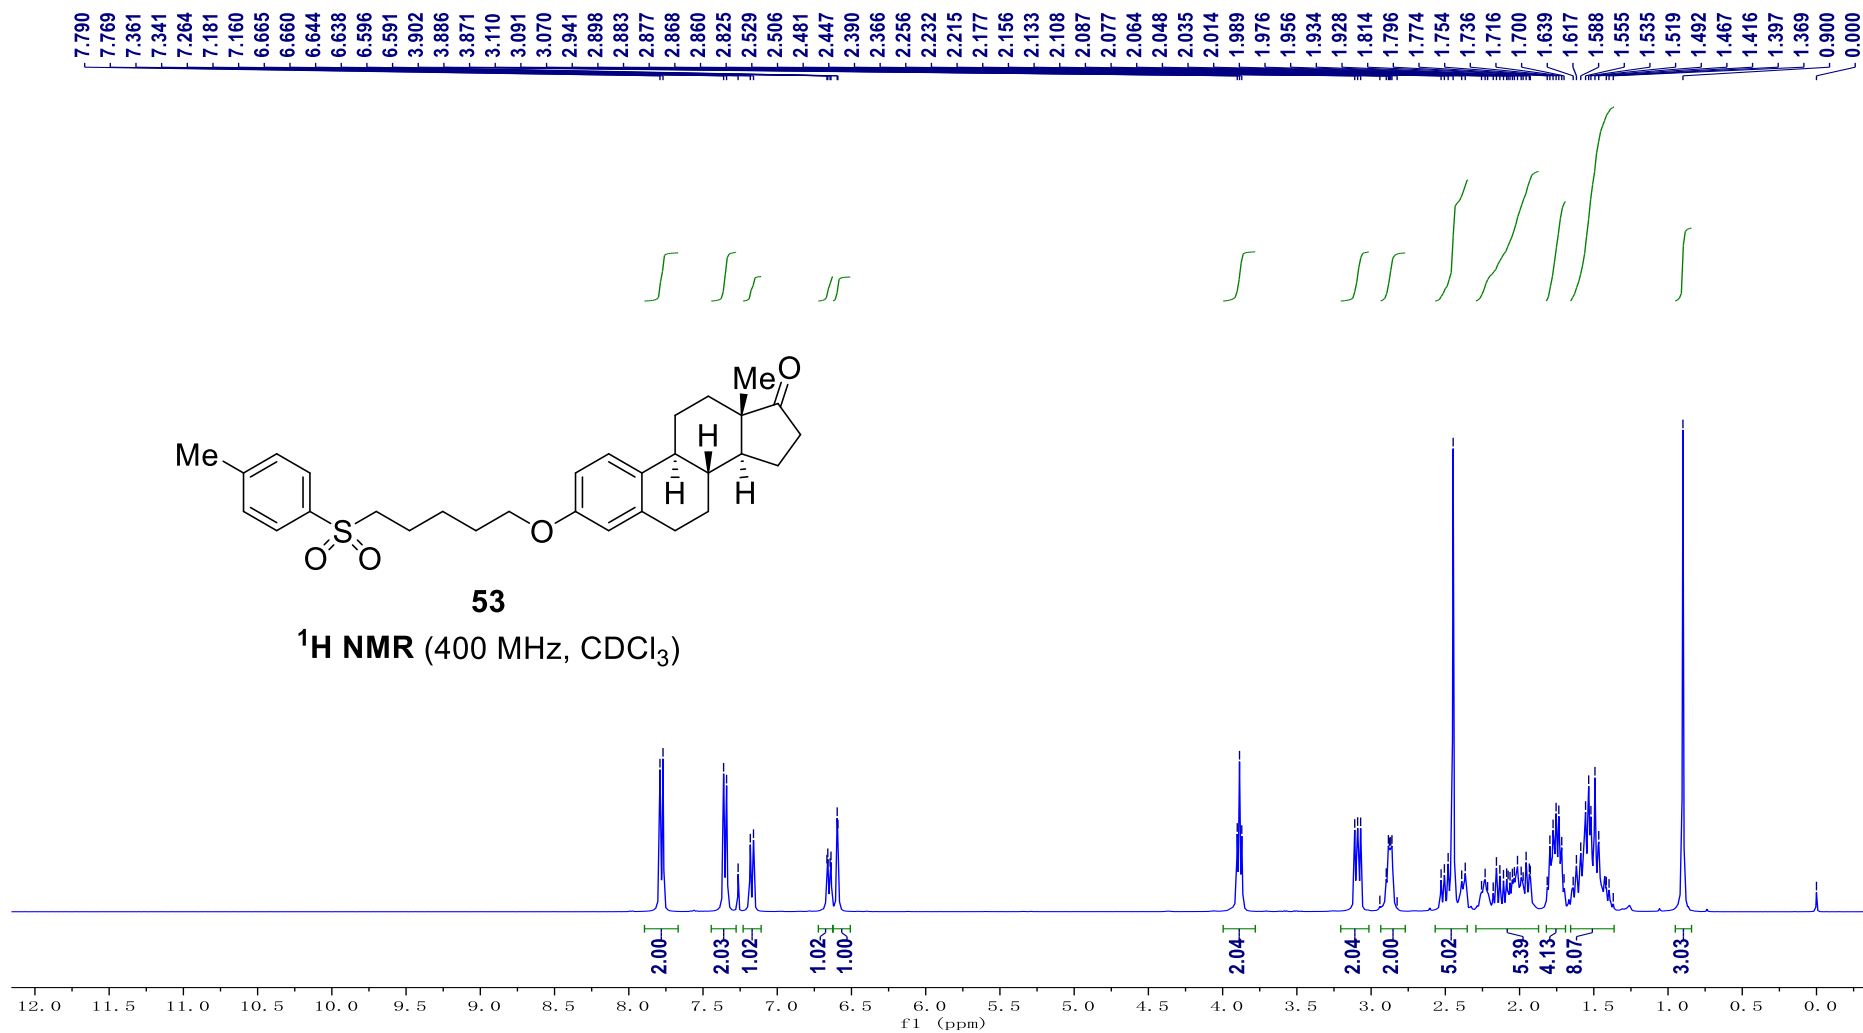

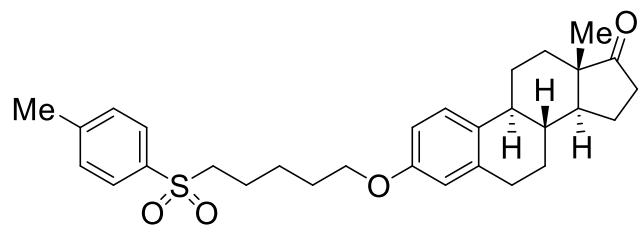

53

<sup>13</sup>C NMR (75 MHz, CDCl<sub>3</sub>)

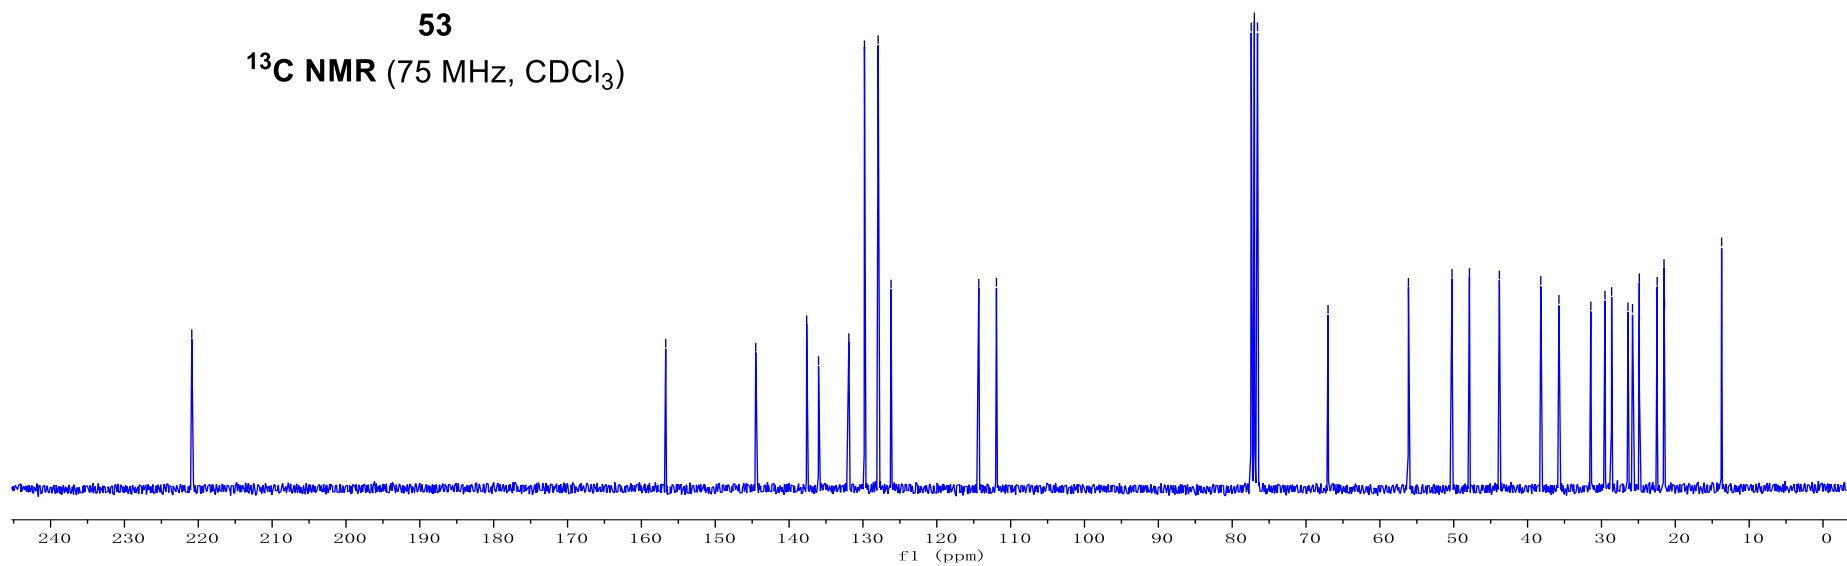

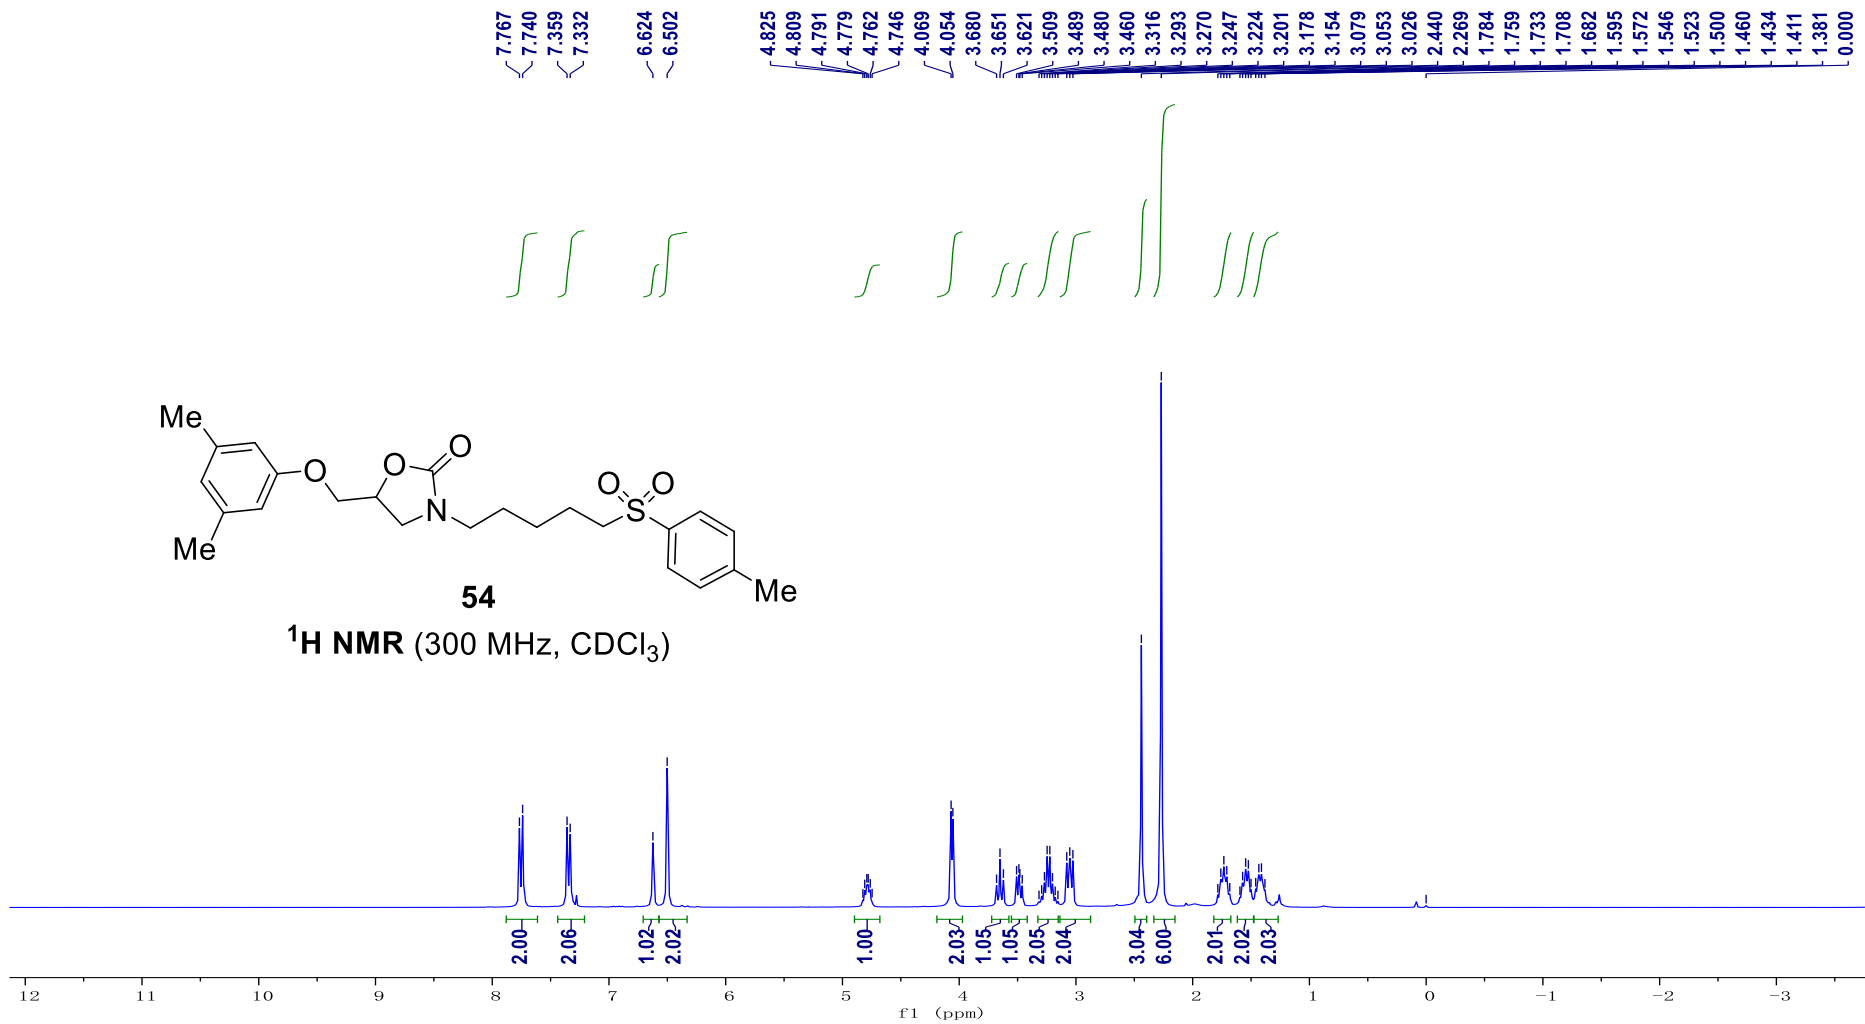

157.969  
157.432

144.549

139.194

135.871

129.769

127.793

123.140

112.132

77.425

77.000

76.575

70.647

67.839

55.843

46.297

43.476

26.632

25.092

22.263

21.443

21.226

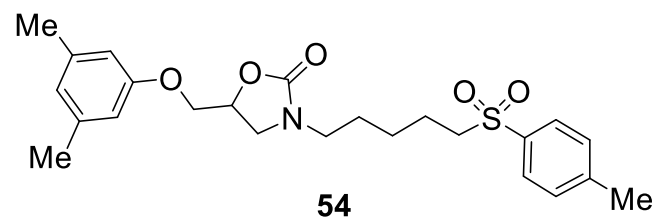

<sup>13</sup>C NMR (75 MHz, CDCl<sub>3</sub>)

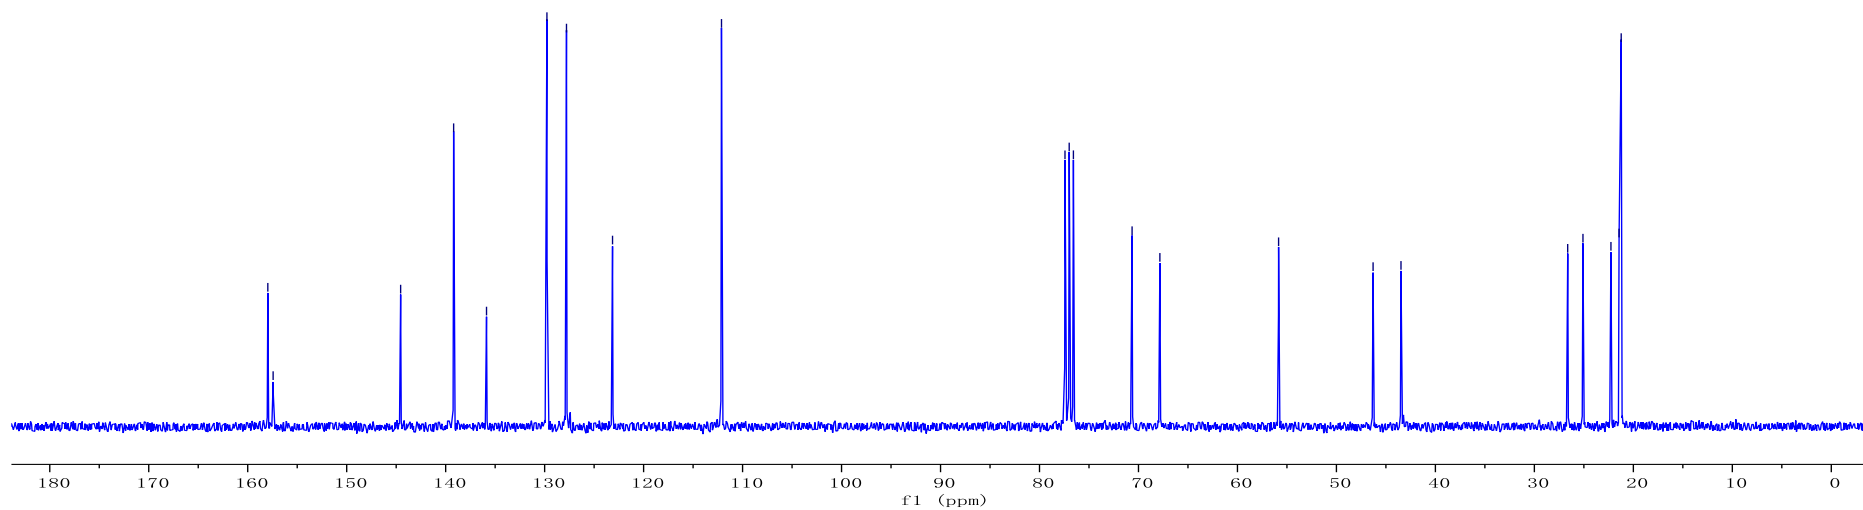

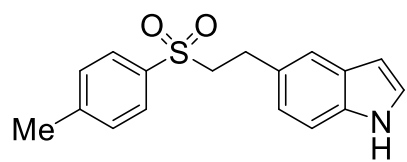

**56**

**<sup>1</sup>H NMR (300 MHz, CDCl<sub>3</sub>)**

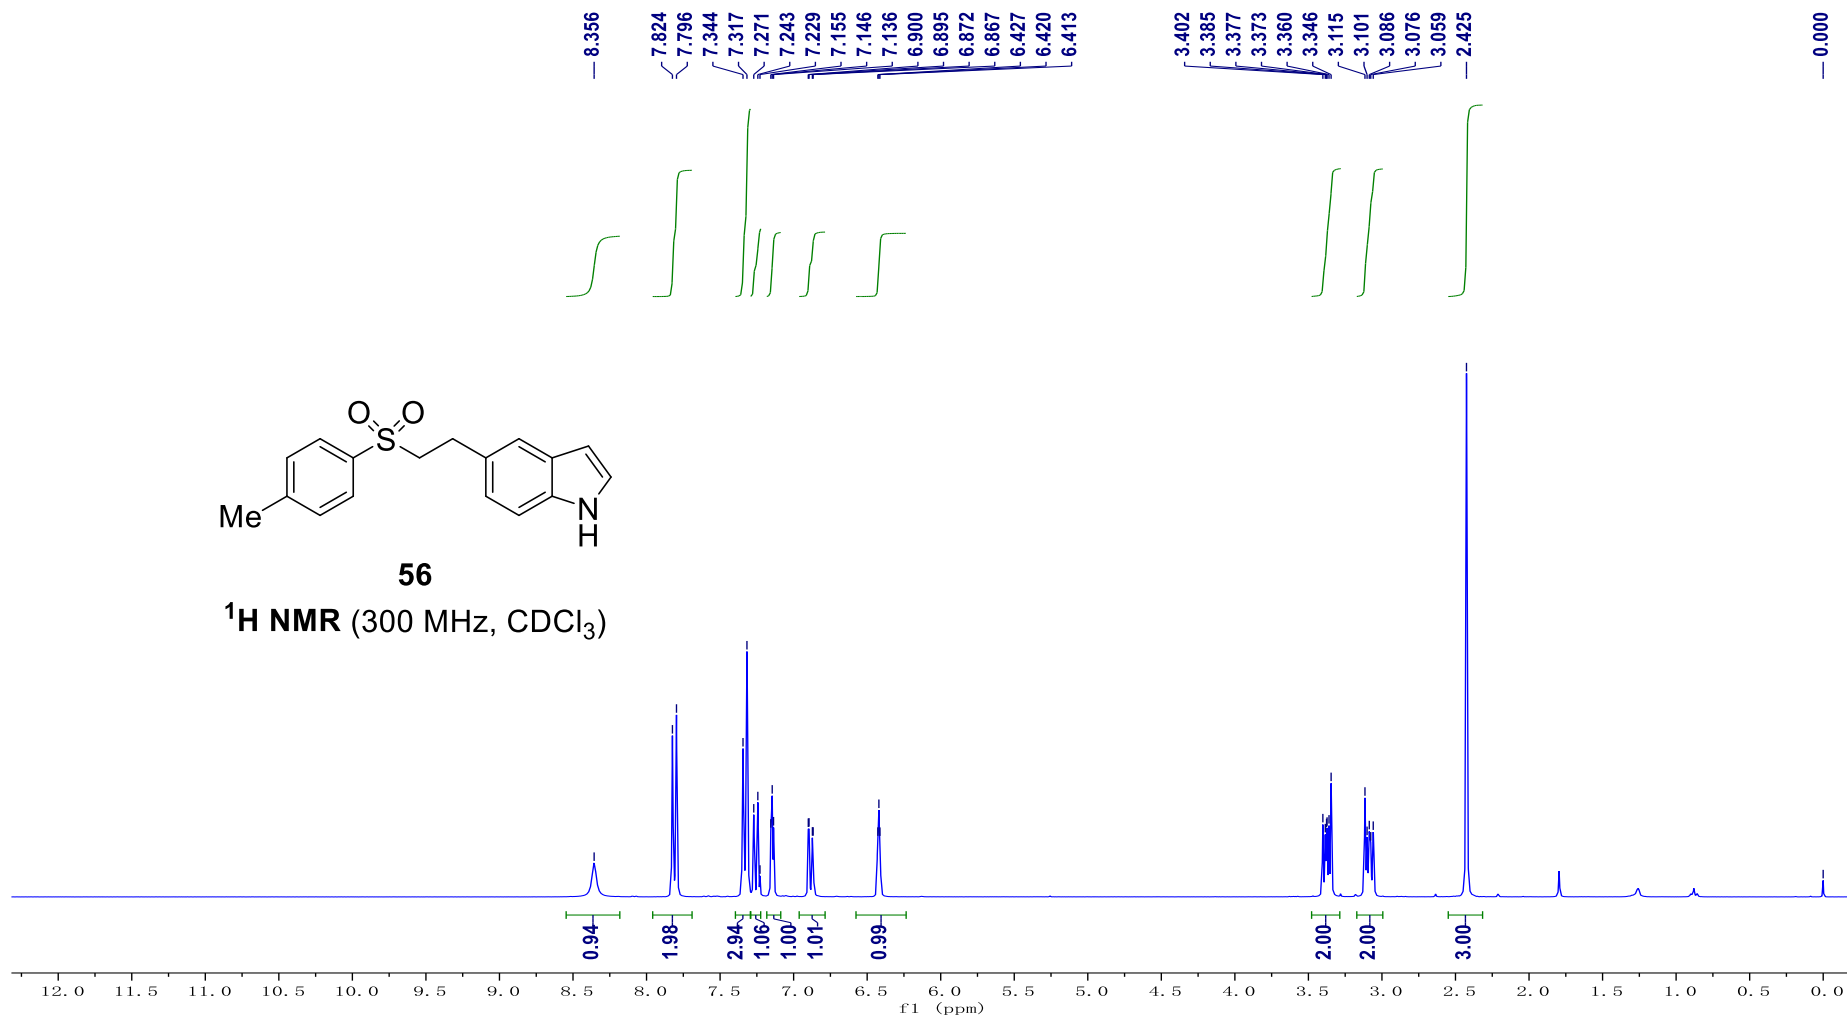



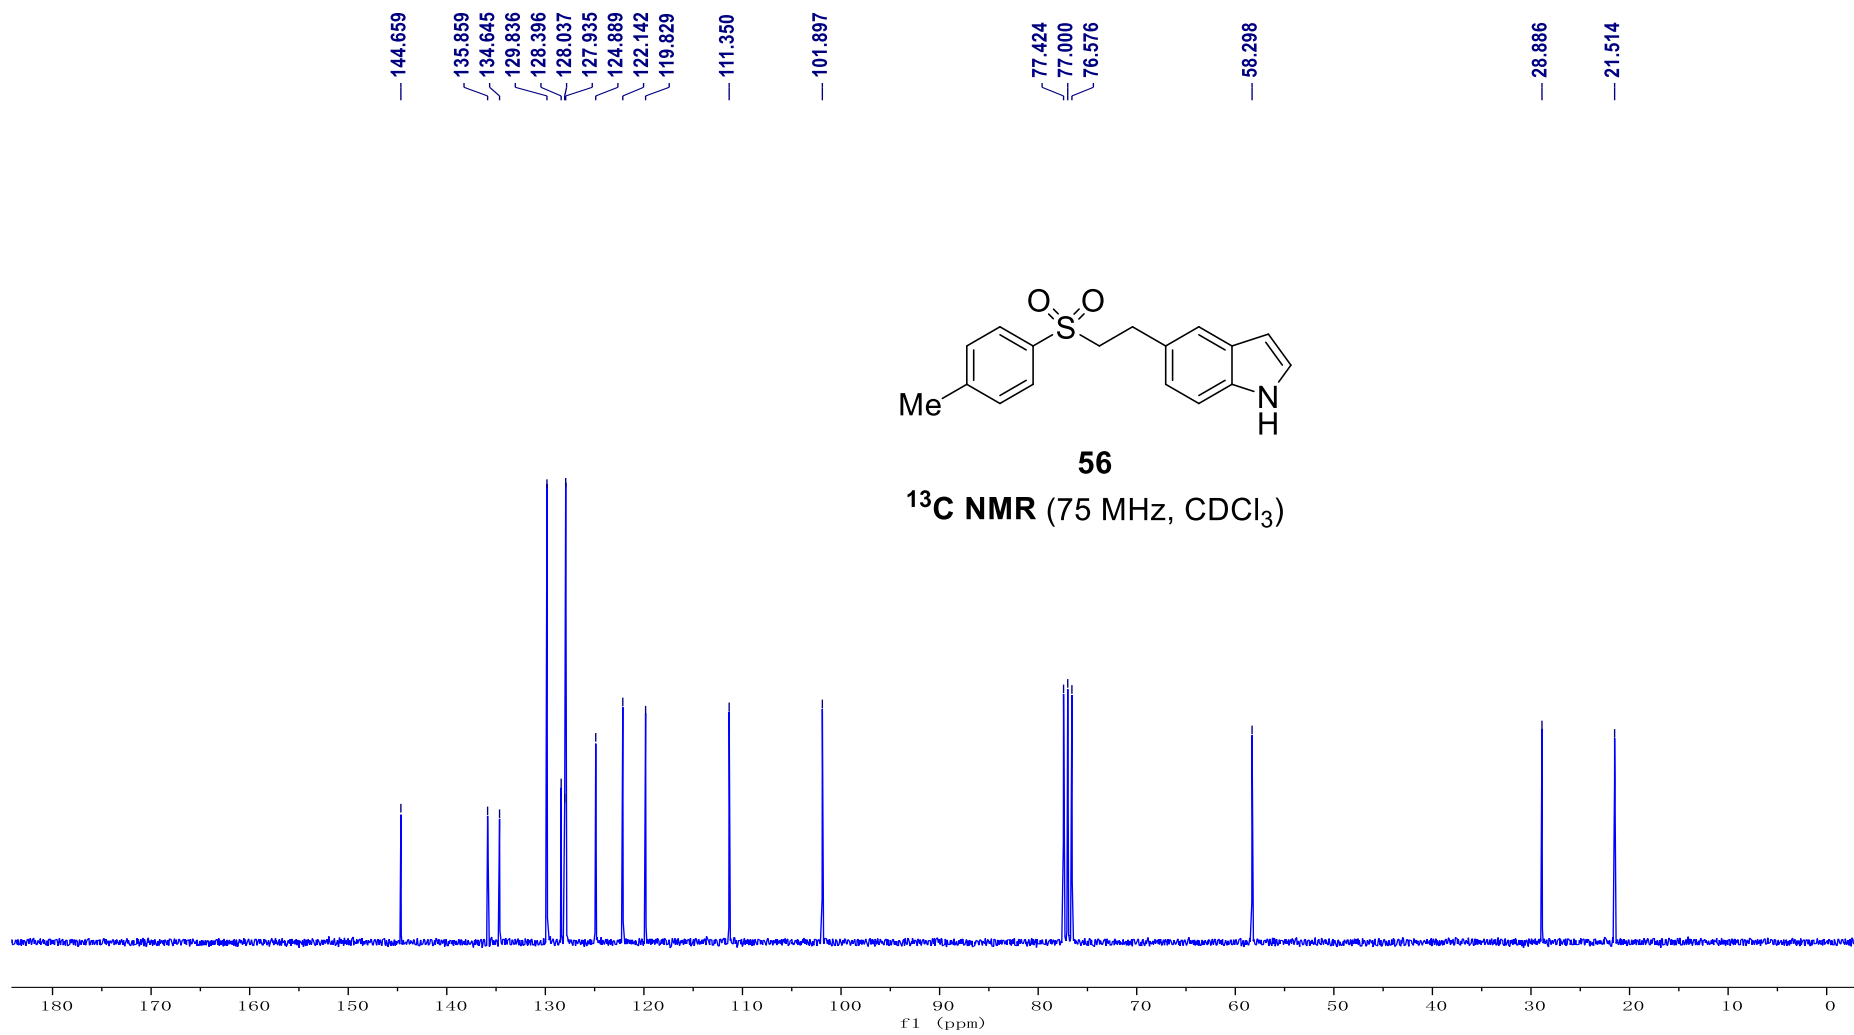

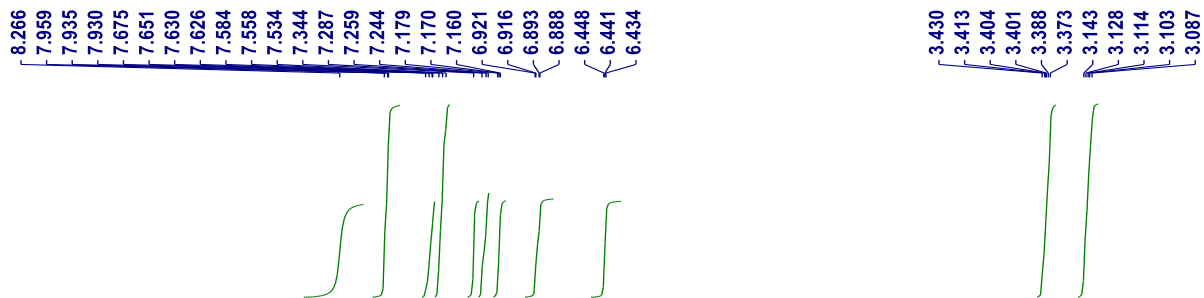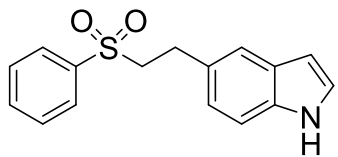

57

<sup>1</sup>H NMR (300 MHz, CDCl<sub>3</sub>)

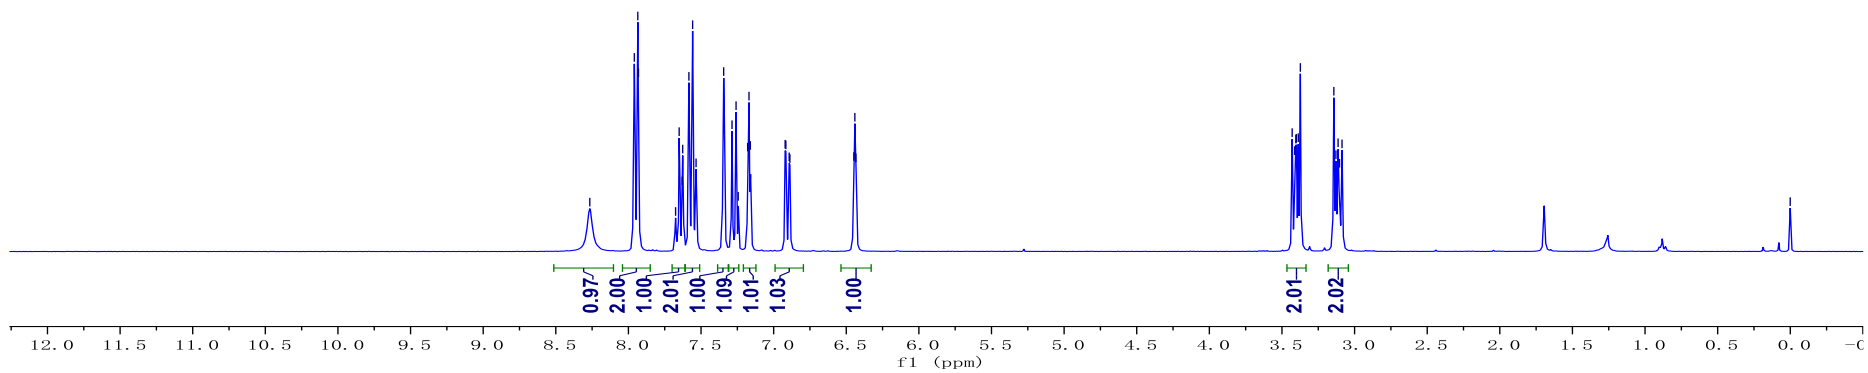

138.967  
134.683  
133.679  
129.258  
128.500  
128.117  
128.003  
124.859  
122.276  
119.970

111.349

102.124

77.424  
77.000  
76.576

58.291

28.840

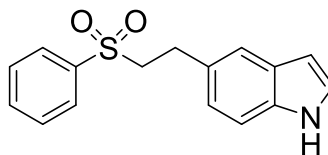

57

<sup>13</sup>C NMR (75 MHz, CDCl<sub>3</sub>)

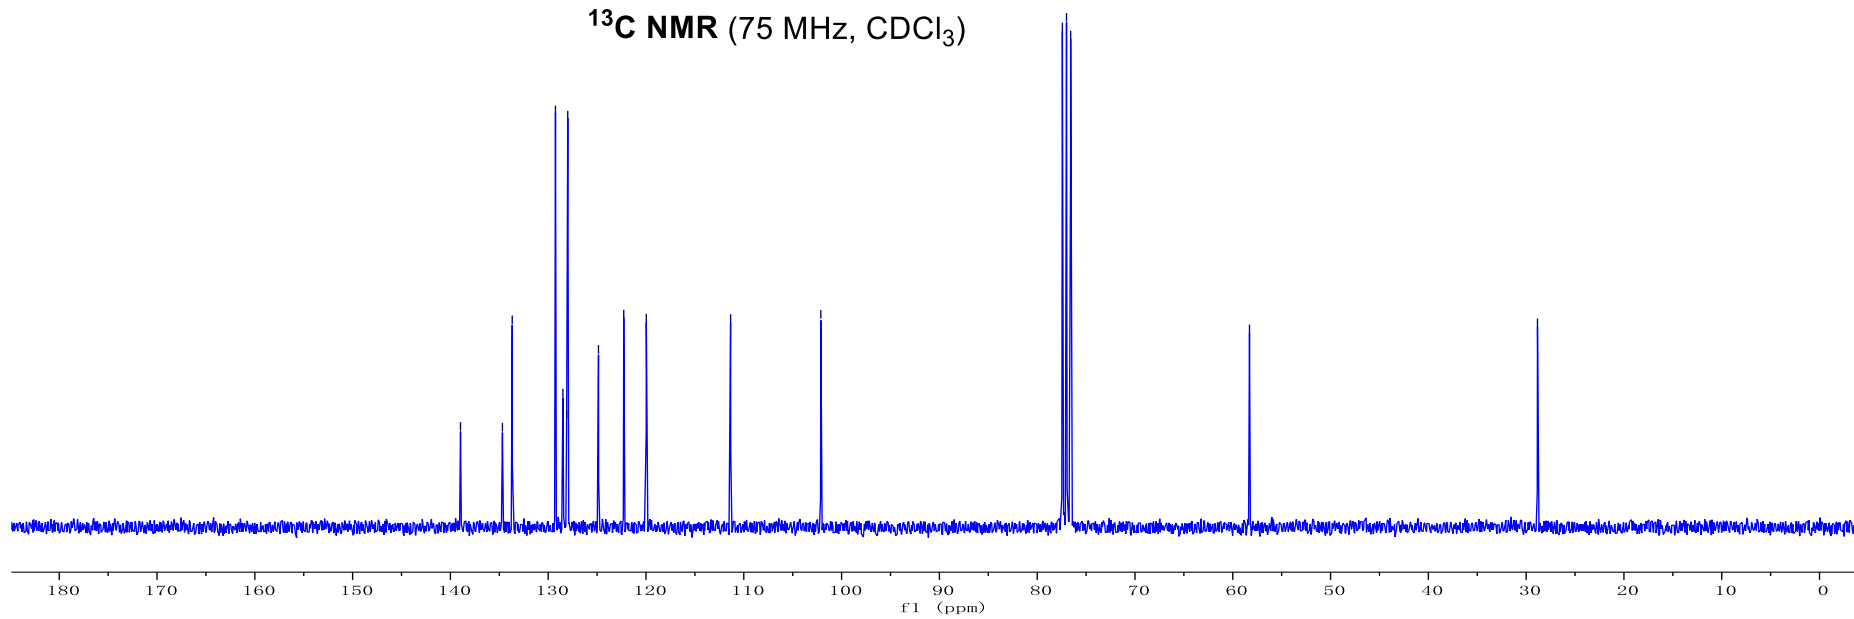

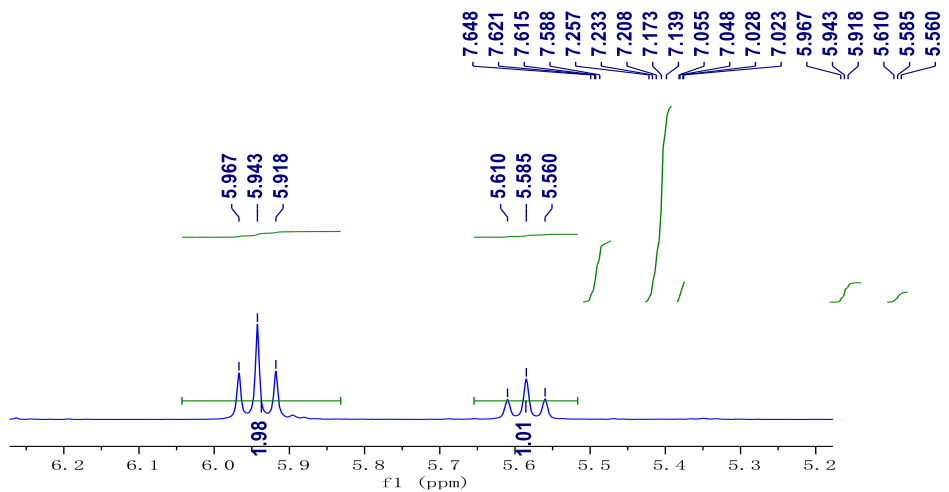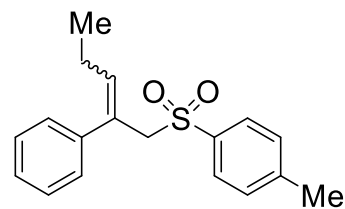

**60**

**<sup>1</sup>H NMR (300 MHz, CDCl<sub>3</sub>)**  
 major isomer/minor isomer = 2:1

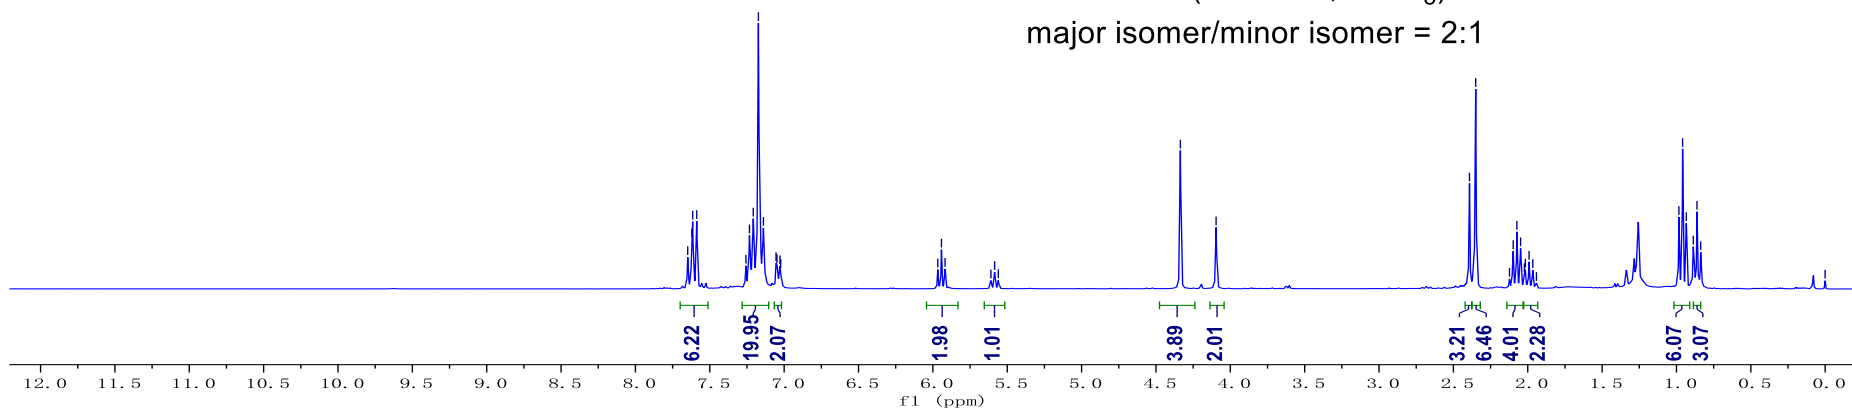

144.337  
144.252  
140.800  
140.134  
140.101  
138.304  
135.892  
135.706  
129.366  
129.337  
128.443  
128.396  
128.121  
127.969  
127.516  
127.260  
126.985  
126.877  
126.319

77.424  
77.000  
76.576

64.964

57.592

22.681  
22.620  
21.486  
21.452  
13.830  
13.510

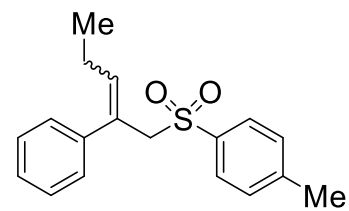

60

<sup>13</sup>C NMR (75 MHz, CDCl<sub>3</sub>)

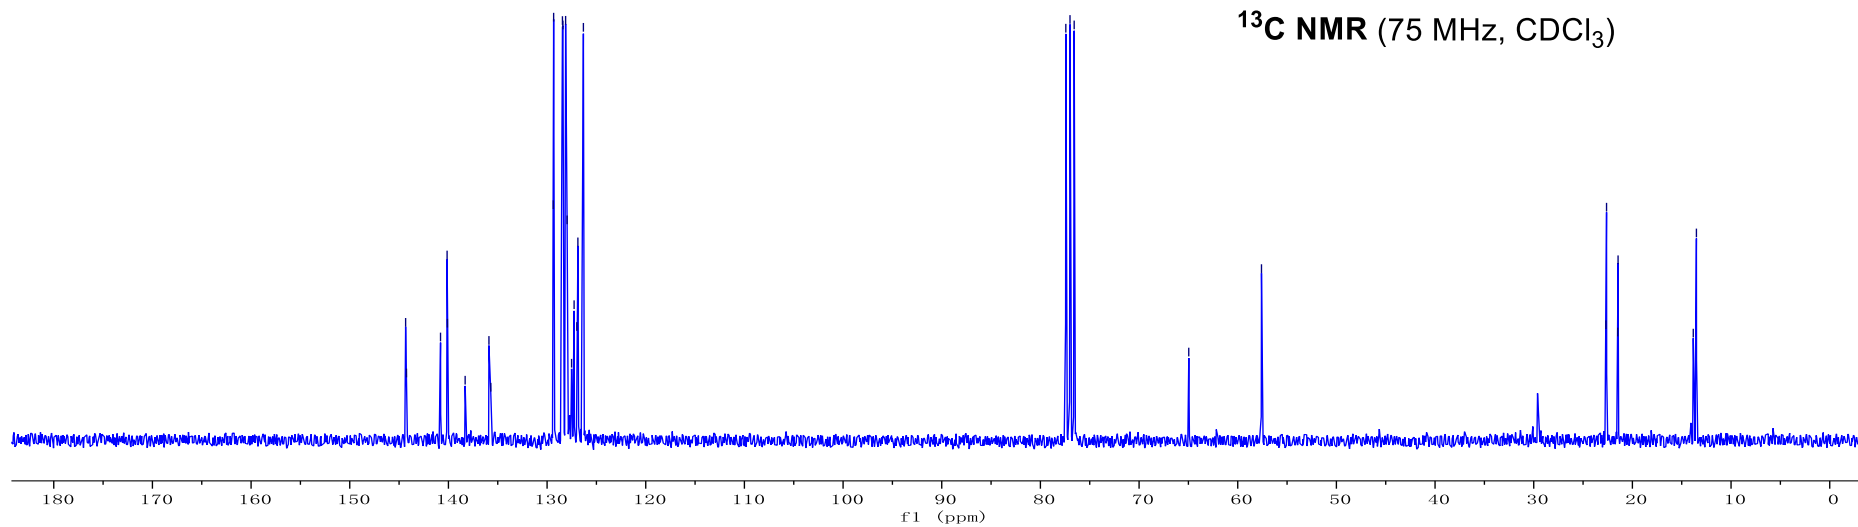

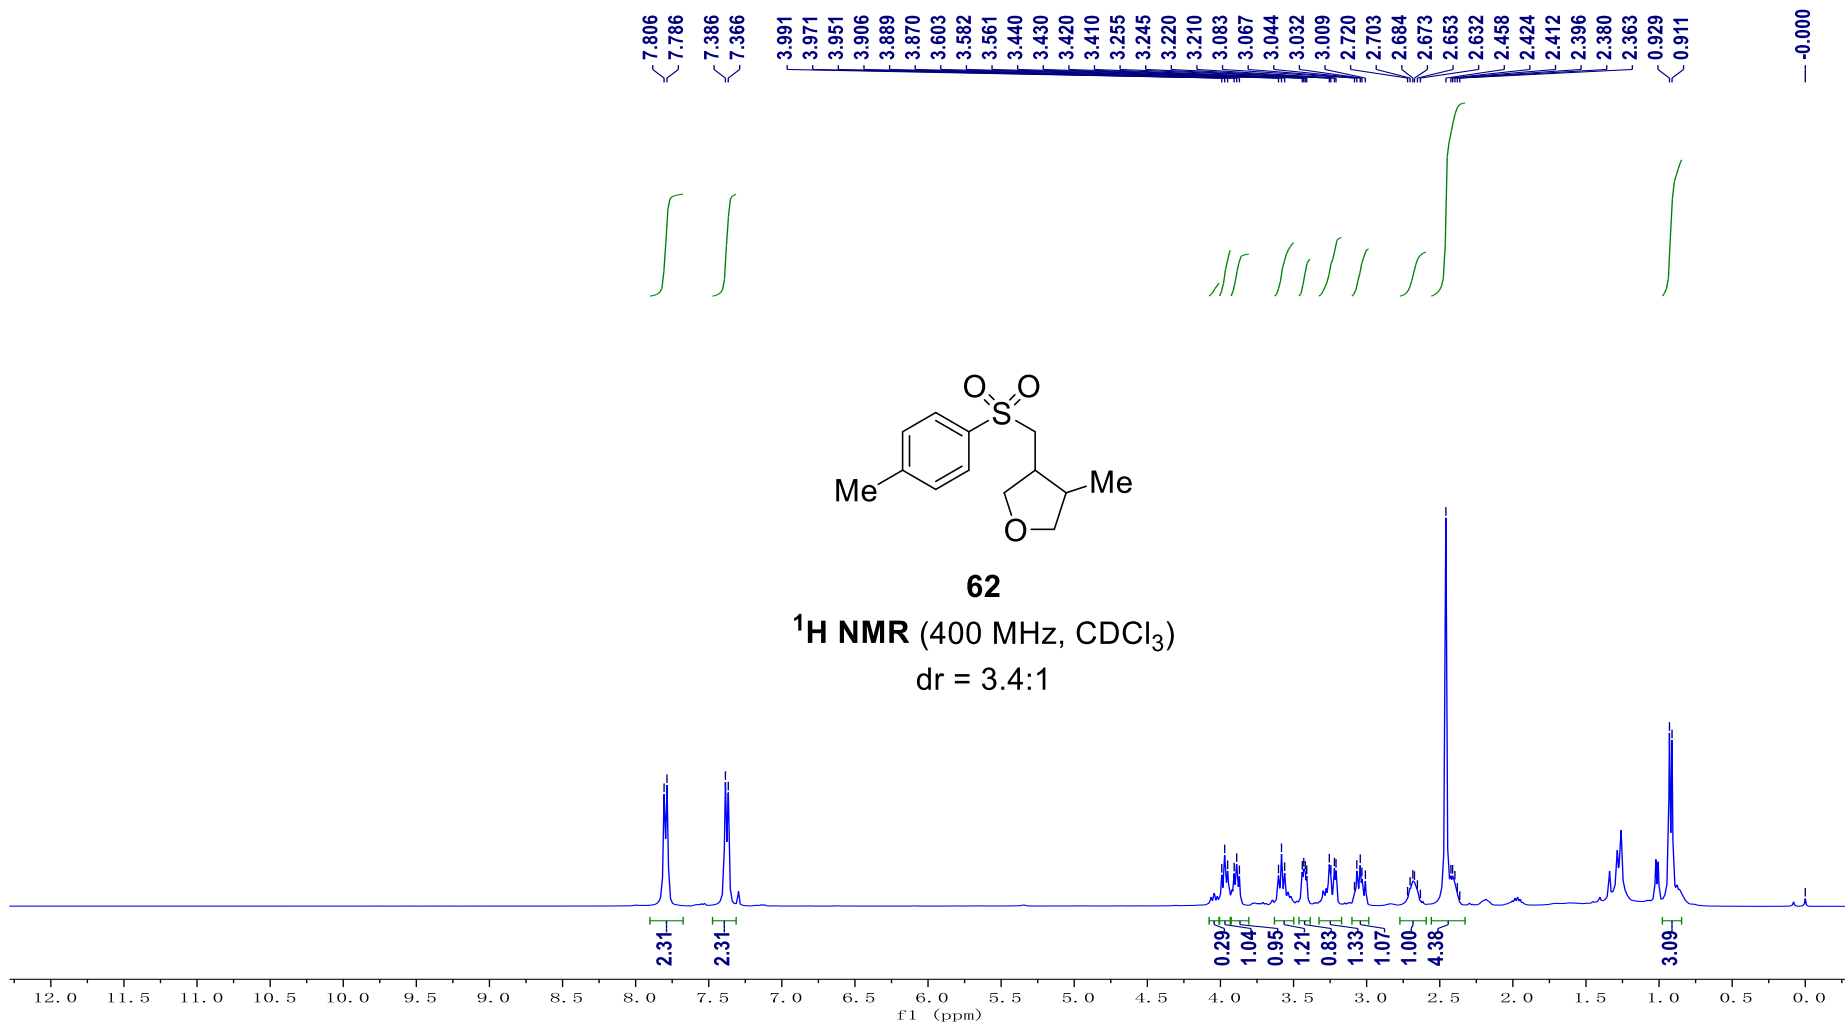

— 144.935

— 136.306

— 129.999

— 127.913

77.424

77.000

76.576

74.531

70.870

— 55.338

36.590

35.879

— 21.595

— 13.346

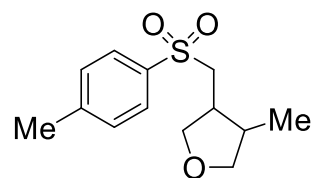

**62**

**<sup>13</sup>C NMR (75 MHz, CDCl<sub>3</sub>)**

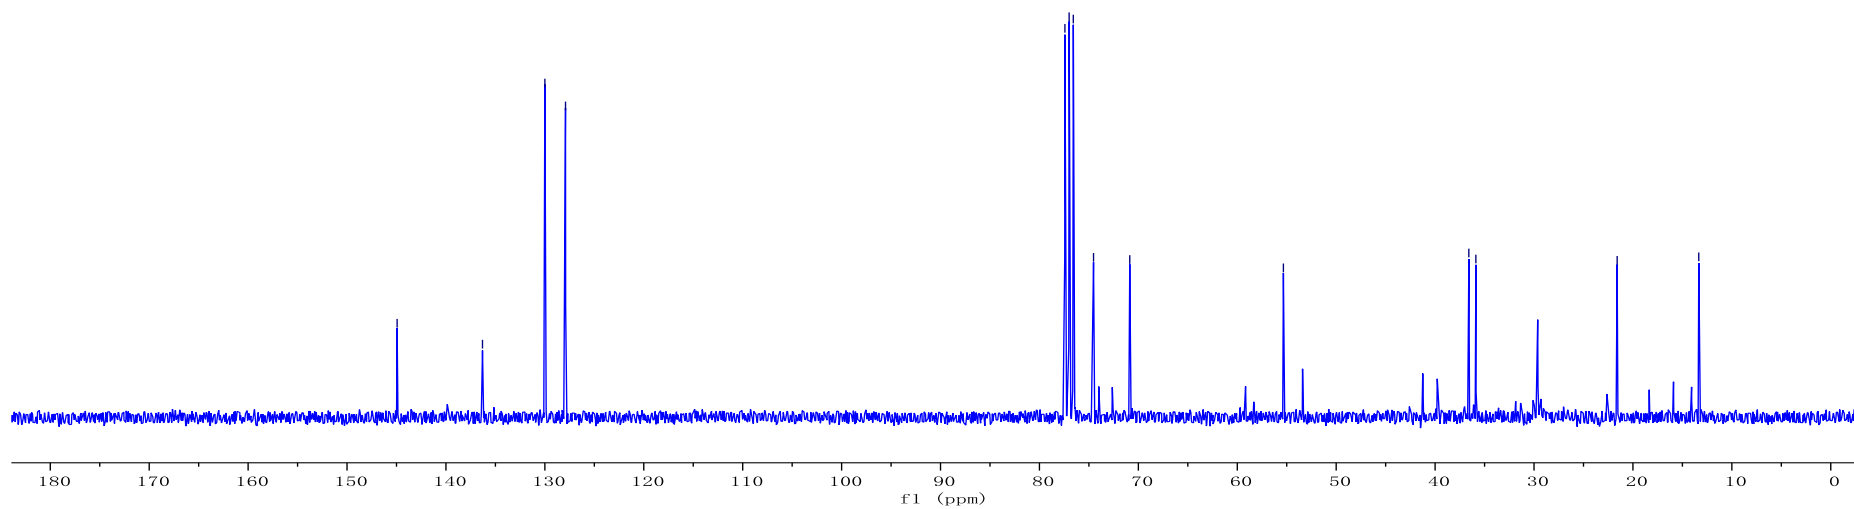

Supplement: d3gc00712j1.pdf [file d3gc00712j1.pdf]
